# Supplementary material for: Multiple Routes to Oncogenesis Are Promoted by the Human Papillomavirus–Host Protein Network
Source: Oxford University Press journal article supplement (doi:10.1158/2159-8290.cd-17-1018), 2018-09-12
Supplement: 21598290cd171018-sup-189143_3_supp_4844069_pwp08g.xlsx [file 21598290cd171018-sup-189143_3_supp_4844069_pwp08g.xlsx]

## Sheet: Combined significance
Supplemental Table S5 | Genes with Combined Significance in both HPV Interaction and Genetic Alteration. Related to Figure 3.
Gene	MiST	Propagated MiST	p-value of propagated MiST	Deviance	Propagated Deviance	p-value of propagated Deviance	Combined propagated score	Combined Significance (p-value)	Combined Significance (FDR)
TP53	0.985498	1.08073	0.0006	230.845	122.146	5e-05	132.007	0	0
CDKN2A	0.781586	0.466876	0.0036	121.849	62.1043	0.0001	28.995	0	0
CCND1	0	0.211221	0.05655	24.9367	14.7146	0.00015	3.10804	5e-05	0.0752063
MTAP	0.685513	0.401846	0.01055	13.9841	7.72189	0.001	3.10301	5e-05	0.0752063
PPP2R2A	0.68551	0.513838	0.00065	5.34419	3.30436	0.00995	1.69791	0.0001	0.109391
STRADA	0.685511	0.36744	0.01545	10.5948	5.51095	0.0025	2.02494	0.0001	0.109391
PNMA2	0.811611	0.417614	0.0047	7.67127	3.97752	0.0048	1.66107	0.00015	0.150413
KEAP1	0.809485	0.416808	0.00475	5.26021	2.73897	0.00925	1.14162	0.0002	0.150413
PPP2CB	0.468091	0.288061	0.03875	7.87967	4.62795	0.00395	1.33313	0.0002	0.150413
FAT4	0.68551	0.34807	0.0298	6.41937	3.2881	0.0074	1.14449	0.00025	0.176956
ST13	0.837319	0.469334	0.00225	4.65342	2.55086	0.01685	1.1972	0.0003	0.180495
AHCTF1	0.68551	0.380397	0.0088	5.45063	3.01826	0.009	1.14814	0.00035	0.20055
PTPN14	0.93277	0.472567	0.00085	4.22889	2.17082	0.02045	1.02586	0.0004	0.20055
SON	0.68551	0.351198	0.00765	5.04435	2.55014	0.01185	0.895603	0.00045	0.216594
ELOVL2	0.807183	0.411141	0.0056	4.33576	2.22314	0.01985	0.914023	0.0005	0.231404
SEC16A	0.68551	0.350398	0.02695	5.45063	2.85941	0.0102	1.00193	0.0006	0.24442
CANX	0.737495	0.406185	0.0117	3.27619	3.29273	0.0109	1.33746	0.00065	0.24442
RBBP7	0.51389	0.388867	0.03145	8.2072	5.2824	0.0042	2.05415	0.00075	0.246993
FOXK1	0.685511	0.348315	0.01075	4.65342	2.37894	0.01345	0.828621	0.00075	0.246993
XRCC6	0.426637	0.256946	0.03735	5.32271	3.19144	0.00835	0.820026	0.00075	0.246993
DDX21	0.393362	0.347866	0.0324	4.97199	2.70705	0.0164	0.941689	0.00075	0.246993
DNAJB1	0.916832	0.570574	5e-05	2.73362	1.48595	0.04725	0.847847	0.0009	0.246993
HIST1H1C	0.38048	0.237287	0.0388	6.25534	3.6678	0.006	0.87032	0.001	0.246993
CDK3	0.685512	0.46117	0.00355	3.70324	2.09096	0.0321	0.964288	0.00105	0.246993
LRP1	0.685511	0.396625	0.01025	3.47254	2.315	0.02755	0.918185	0.00105	0.246993
ATP5J	0.889184	0.54151	5e-05	2.73362	1.48003	0.05265	0.801453	0.0011	0.246993
SLC38A2	0.68551	0.344135	0.0092	4.01904	2.0231	0.0239	0.696218	0.0011	0.246993
PABPC3	0.685514	0.398973	0.0102	3.48575	1.9048	0.0373	0.759966	0.0011	0.246993
AP2B1	0.809611	0.44749	0.00435	3.27619	1.97005	0.0408	0.881578	0.00115	0.246993
CCT2	0.58013	0.393688	0.0098	4.01904	2.39139	0.02465	0.941461	0.00115	0.246993
HP1BP3	0.473524	0.24226	0.03705	4.65342	2.37434	0.0137	0.575206	0.00115	0.246993
SMARCC2	0.68551	0.389872	0.01005	2.94271	1.98286	0.0412	0.773061	0.0013	0.246993
RNF20	0.818047	0.605849	0.0002	0.919554	1.35371	0.07205	0.820142	0.00155	0.246993
HIST1H2BC	0.685531	0.413549	0.00735	3.33365	1.90572	0.03645	0.788109	0.0016	0.246993
HAT1	0.68551	0.397849	0.007	3.03293	1.60318	0.0415	0.637824	0.0016	0.246993
TAF15	0.565707	0.284053	0.03495	3.93907	1.97903	0.0259	0.562148	0.0016	0.246993
PELO	0.685511	0.370804	0.0107	3.33365	1.80781	0.03815	0.670341	0.00165	0.246993
SLC25A12	0.592658	0.297229	0.0308	3.33365	1.67621	0.0349	0.49822	0.0017	0.246993
SNRNP200	0.297326	0.236462	0.0443	6.57843	3.70241	0.0071	0.875478	0.00175	0.246993
ADRM1	0.595137	0.306047	0.0321	3.70324	1.86609	0.03015	0.57111	0.00175	0.246993
KPNA3	0.543764	0.314353	0.0317	3.39537	1.87369	0.0346	0.589002	0.00175	0.246993
RNF40	0.685511	0.376414	0.0078	3.068	1.60921	0.04225	0.605727	0.0018	0.246993
SNRNP70	0.404622	0.279018	0.0347	4.33576	2.83052	0.015	0.789766	0.0018	0.246993
CTNNB1	0.8027	0.622344	0.0174	4.31879	6.53025	0.01455	4.06406	0.00185	0.246993
EGFR	0	0.304027	0.20465	16.243	12.1194	0.00295	3.68463	0.00185	0.246993
OBSCN	0.68551	0.354231	0.00925	3.48206	1.85866	0.03455	0.658396	0.0019	0.246993
MSH2	0.68551	0.376942	0.0111	2.98718	1.85255	0.0364	0.698306	0.0019	0.246993
CREB1	0.896114	0.602067	0.0125	0	5.65946	0.01555	3.40738	0.00195	0.246993
PRKDC	0.454964	0.260357	0.0409	3.57181	2.35209	0.024	0.612385	0.00195	0.246993
RYR3	0.68551	0.355522	0.02495	3.78127	2.0859	0.03205	0.741584	0.002	0.248103
SF3B3	0.393046	0.290841	0.0359	4.15336	2.43345	0.02235	0.707746	0.002	0.248103
