# Supplementary material for: Multiple Routes to Oncogenesis Are Promoted by the Human Papillomavirus–Host Protein Network
Source: Oxford University Press journal article supplement (doi:10.1158/2159-8290.cd-17-1018), 2018-09-12
Supplement: 21598290cd171018-sup-189143_3_supp_4844070_pyp08g.xlsx [file 21598290cd171018-sup-189143_3_supp_4844070_pyp08g.xlsx]

## Sheet: Description of Columns
Supplemental Table S2 | MiST Scores for all HPV-Human PPIs. Related to Figures 1 and 2.
Column name	Description
Bait	bait name (HPV protein)
Prey	UniProtKB accession number
name	UniProtKB entry name (without _HUMAN)
Abundance	MiST abundance score
Reproducibility	MiST reproducibility score
Specificity	MiST specificity score
MiST score	MiST score (0-1; 1 highest; >0.75 = high confidence interaction)
Sample ID	sample IDs PPI detected in
Entry.name	prey UniProtKB entry name
Status	prey UniProtKB entry review status
Protein.names	prey UniProtKB entry protein names
Gene.names	prey gene names (from UniProtKB)
Organism	prey organism
Length	prey length (amino acids)

## Sheet: C33A
Bait	Prey	name	Abundance	Reproducibility	Specificity	MiST	Sample ID	Entry.name	Status	Protein.names	Gene.names	Organism	Length
HPV-31_E6	Q04837	SSBP	0.0151216	0.972971	1	0.985791	ME5.18,ME6.17,ME7.18,ME8.2,ME9.5	SSBP_HUMAN	reviewed	Single-stranded DNA-binding protein, mitochondrial (Mt-SSB) (MtSSB) (PWP1-interacting protein 17)	SSBP1 SSBP	Homo sapiens (Human)	148
HPV-31_E6	P04637	P53	0.0260317	0.971811	1	0.985498	ME5.18,ME6.17,ME7.18,ME8.2,ME9.5	P53_HUMAN	reviewed	Cellular tumor antigen p53 (Antigen NY-CO-13) (Phosphoprotein p53) (Tumor suppressor p53)	TP53 P53	Homo sapiens (Human)	393
HPV-31_E6	O95714	HERC2	0.00344738	0.971589	1	0.985295	ME5.18,ME6.17,ME7.18,ME8.2,ME9.5	HERC2_HUMAN	reviewed	E3 ubiquitin-protein ligase HERC2 (EC 6.3.2.-) (HECT domain and RCC1-like domain-containing protein 2)	HERC2	Homo sapiens (Human)	4834
HPV-31_L2	Q15036	SNX17	0.0050482	0.967361	1	0.984	ME5.22,ME6.21,ME7.20,ME8.7,ME9.7	SNX17_HUMAN	reviewed	Sorting nexin-17	SNX17 KIAA0064	Homo sapiens (Human)	470
HPV-31_E6	Q05086	UBE3A	0.0225156	0.966226	1	0.983754	ME5.18,ME6.17,ME7.18,ME8.2,ME9.5	UBE3A_HUMAN	reviewed	Ubiquitin-protein ligase E3A (EC 6.3.2.-) (E6AP ubiquitin-protein ligase) (Human papillomavirus E6-associated protein) (Oncogenic protein-associated protein E6-AP) (Renal carcinoma antigen NY-REN-54)	UBE3A E6AP EPVE6AP HPVE6A	Homo sapiens (Human)	875
HPV-31_E1	Q8TAF3	WDR48	0.0152441	0.947665	1	0.977984	ME5.21,ME6.22,ME7.23,ME8.11,ME9.10	WDR48_HUMAN	reviewed	WD repeat-containing protein 48 (USP1-associated factor 1) (WD repeat endosomal protein) (p80)	WDR48 KIAA1449 UAF1	Homo sapiens (Human)	677
HPV-31_E6	Q96JN8	NEUL4	0.00233875	0.946491	1	0.977545	ME5.18,ME6.17,ME7.18,ME8.2,ME9.5	NEUL4_HUMAN	reviewed	Neuralized-like protein 4	NEURL4 KIAA1787	Homo sapiens (Human)	1562
HPV-31_E8^E2C	P14735	IDE	0.00577665	0.935931	1	0.974307	ME5.15,ME6.15,ME7.15,ME8.4,ME9.2	IDE_HUMAN	reviewed	Insulin-degrading enzyme (EC 3.4.24.56) (Abeta-degrading protease) (Insulin protease) (Insulinase) (Insulysin)	IDE	Homo sapiens (Human)	1019
HPV-31_E2	O95071	UBR5	0.00557178	0.96195	0.983971	0.971345	ME5.20,ME6.19,ME7.21,ME8.9,ME9.9	UBR5_HUMAN	reviewed	E3 ubiquitin-protein ligase UBR5 (EC 6.3.2.-) (E3 ubiquitin-protein ligase, HECT domain-containing 1) (Hyperplastic discs protein homolog) (hHYD) (Progestin-induced protein)	UBR5 EDD EDD1 HYD KIAA0896	Homo sapiens (Human)	2799
HPV-31_E6	Q9P013	CWC15	0.00438077	0.909917	1	0.966273	ME5.18,ME6.17,ME7.18,ME8.2,ME9.5	CWC15_HUMAN	reviewed	Spliceosome-associated protein CWC15 homolog	CWC15 C11orf5 AD-002 HSPC148	Homo sapiens (Human)	229
HPV-31_E7	Q9P0J7	KCMF1	0.00851499	0.905372	1	0.964895	ME5.19,ME6.23,ME7.19,ME8.8,ME9.8	KCMF1_HUMAN	reviewed	E3 ubiquitin-protein ligase KCMF1 (EC 6.3.2.-) (FGF-induced in gastric cancer) (Potassium channel modulatory factor) (PCMF) (ZZ-type zinc finger-containing protein 1)	KCMF1 FIGC ZZZ1	Homo sapiens (Human)	381
HPV-31_E1	Q8IZL8	PELP1	0.00132904	0.891415	1	0.960546	ME5.21,ME6.22,ME7.23,ME8.11,ME9.10	PELP1_HUMAN	reviewed	Proline-, glutamic acid- and leucine-rich protein 1 (Modulator of non-genomic activity of estrogen receptor) (Transcription factor HMX3)	PELP1 HMX3 MNAR	Homo sapiens (Human)	1130
HPV-31_E2	Q5VSY0	GKAP1	0.00269032	0.837825	1	0.94402	ME6.19,ME7.21,ME8.9,ME9.9	GKAP1_HUMAN	reviewed	G kinase-anchoring protein 1 (cGMP-dependent protein kinase-anchoring protein of 42 kDa)	GKAP1 GKAP42 FKSG21	Homo sapiens (Human)	366
HPV-31_E1	Q8TBZ3	WDR20	0.00637984	0.831714	1	0.942157	ME5.21,ME6.22,ME7.23,ME8.11,ME9.10	WDR20_HUMAN	reviewed	WD repeat-containing protein 20 (Protein DMR)	WDR20	Homo sapiens (Human)	569
HPV-31_E7	Q08999	RBL2	0.00314425	0.820965	1	0.938821	ME6.23,ME7.19,ME8.8,ME9.8	RBL2_HUMAN	reviewed	Retinoblastoma-like protein 2 (130 kDa retinoblastoma-associated protein) (p130) (Retinoblastoma-related protein 2) (RBR-2) (pRb2)	RBL2 RB2	Homo sapiens (Human)	1139
HPV-31_E7	Q9BXS5	AP1M1	0.00213905	0.814992	1	0.936972	ME6.23,ME7.19,ME8.8,ME9.8	AP1M1_HUMAN	reviewed	AP-1 complex subunit mu-1 (AP-mu chain family member mu1A) (Adaptor protein complex AP-1 mu-1 subunit) (Adaptor-related protein complex 1 mu-1 subunit) (Clathrin assembly protein complex 1 medium chain 1) (Clathrin coat assembly protein AP47) (Clathrin coat-associated protein AP47) (Golgi adaptor HA1/AP1 adaptin mu-1 subunit) (Mu-adaptin 1) (Mu1A-adaptin)	AP1M1 CLTNM	Homo sapiens (Human)	423
HPV-31_E7	Q15678	PTN14	0.0060769	0.801296	1	0.93277	ME6.23,ME7.19,ME8.8,ME9.8	PTN14_HUMAN	reviewed	Tyrosine-protein phosphatase non-receptor type 14 (EC 3.1.3.48) (Protein-tyrosine phosphatase pez)	PTPN14 PEZ PTPD2	Homo sapiens (Human)	1187
HPV-31_E7	Q5T4S7	UBR4	0.00713541	0.824304	0.988725	0.932146	ME5.19,ME6.23,ME7.19,ME8.8,ME9.8	UBR4_HUMAN	reviewed	E3 ubiquitin-protein ligase UBR4 (EC 6.3.2.-) (600 kDa retinoblastoma protein-associated factor) (N-recognin-4) (Retinoblastoma-associated factor of 600 kDa) (RBAF600) (p600) (Zinc finger UBR1-type protein 1)	UBR4 KIAA0462 KIAA1307 RBAF600 ZUBR1	Homo sapiens (Human)	5183
HPV-31_E7	Q16254	E2F4	0.0035963	0.799072	1	0.932069	ME5.19,ME6.23,ME7.19,ME8.8	E2F4_HUMAN	reviewed	Transcription factor E2F4 (E2F-4)	E2F4	Homo sapiens (Human)	413
HPV-31_E1	P06493	CDK1	0.00378259	0.854226	0.969481	0.928166	ME6.22,ME7.23,ME8.11,ME9.10	CDK1_HUMAN	reviewed	Cyclin-dependent kinase 1 (CDK1) (EC 2.7.11.22) (EC 2.7.11.23) (Cell division control protein 2 homolog) (Cell division protein kinase 1) (p34 protein kinase)	CDK1 CDC2 CDC28A CDKN1 P34CDC2	Homo sapiens (Human)	297
HPV-31_E5	P46379	BAG6	0.00176444	0.784717	1	0.927629	ME6.18,ME7.17,ME8.6,ME9.6	BAG6_HUMAN	reviewed	Large proline-rich protein BAG6 (BAG family molecular chaperone regulator 6) (BCL2-associated athanogene 6) (BAG-6) (BAG6) (HLA-B-associated transcript 3) (Protein G3) (Protein Scythe)	BAG6 BAT3 G3	Homo sapiens (Human)	1132
HPV-31_E5	Q4ZIN3	MBRL	0.00113546	0.780811	1	0.92642	ME6.18,ME7.17,ME8.6,ME9.6	MBRL_HUMAN	reviewed	Membralin	C19orf6	Homo sapiens (Human)	620
HPV-31_E7	P11137	MAP2	0.000974437	0.775681	1	0.924837	ME6.23,ME7.19,ME8.8,ME9.8	MAP2_HUMAN	reviewed	Microtubule-associated protein 2 (MAP-2)	MAP2	Homo sapiens (Human)	1827
HPV-31_E7	P28749	RBL1	0.00701626	0.808867	0.981459	0.922401	ME6.23,ME7.19,ME8.8,ME9.8	RBL1_HUMAN	reviewed	Retinoblastoma-like protein 1 (107 kDa retinoblastoma-associated protein) (p107) (pRb1)	RBL1	Homo sapiens (Human)	1068
HPV-31_E1	O94782	UBP1	0.00562157	0.754458	1	0.918316	ME6.22,ME7.23,ME8.11,ME9.10	UBP1_HUMAN	reviewed	Ubiquitin carboxyl-terminal hydrolase 1 (EC 3.4.19.12) (Deubiquitinating enzyme 1) (hUBP) (Ubiquitin thioesterase 1) (Ubiquitin-specific-processing protease 1)	USP1	Homo sapiens (Human)	785
HPV-31_E5	P25685	DNJB1	0.00928739	0.82039	0.968128	0.916832	ME6.18,ME7.17,ME8.6,ME9.6	DNJB1_HUMAN	reviewed	DnaJ homolog subfamily B member 1 (DnaJ protein homolog 1) (Heat shock 40 kDa protein 1) (HSP40) (Heat shock protein 40) (Human DnaJ protein 1) (hDj-1)	DNAJB1 DNAJ1 HDJ1 HSPF1	Homo sapiens (Human)	340
HPV-31_E1	P39687	AN32A	0.00466495	0.719117	1	0.907407	ME5.21,ME6.22,ME7.23,ME8.11	AN32A_HUMAN	reviewed	Acidic leucine-rich nuclear phosphoprotein 32 family member A (Acidic nuclear phosphoprotein pp32) (Leucine-rich acidic nuclear protein) (LANP) (Mapmodulin) (Potent heat-stable protein phosphatase 2A inhibitor I1PP2A) (Putative HLA-DR-associated protein I) (PHAPI)	ANP32A C15orf1 LANP MAPM PHAP1	Homo sapiens (Human)	249
HPV-31_E6	O00231	PSD11	0.00139988	0.843231	0.942523	0.906279	ME5.18,ME6.17,ME7.18,ME8.2	PSD11_HUMAN	reviewed	26S proteasome non-ATPase regulatory subunit 11 (26S proteasome regulatory subunit RPN6) (26S proteasome regulatory subunit S9) (26S proteasome regulatory subunit p44.5)	PSMD11	Homo sapiens (Human)	422
HPV-31_E7	P16220	CREB1	0.00112653	0.682584	1	0.896114	ME6.23,ME7.19,ME9.8	CREB1_HUMAN	reviewed	Cyclic AMP-responsive element-binding protein 1 (CREB-1) (cAMP-responsive element-binding protein 1)	CREB1	Homo sapiens (Human)	341
HPV-31_E7	Q6P1L8	RM14	0.00470515	0.680501	1	0.895493	ME6.23,ME7.19,ME9.8	RM14_HUMAN	reviewed	39S ribosomal protein L14, mitochondrial (L14mt) (MRP-L14) (39S ribosomal protein L32, mitochondrial) (L32mt) (MRP-L32)	MRPL14 MRPL32 RPML32	Homo sapiens (Human)	145
HPV-31_E7	Q9NUJ1	ABHDA	0.00834454	0.795312	0.947932	0.895244	ME6.23,ME7.19,ME8.8,ME9.8	ABHDA_HUMAN	reviewed	Mycophenolic acid acyl-glucuronide esterase, mitochondrial (EC 3.1.1.93) (Alpha/beta hydrolase domain-containing protein 10) (Abhydrolase domain-containing protein 10)	ABHD10	Homo sapiens (Human)	306
HPV-31_E1	P46060	RAGP1	0.00134578	0.678025	1	0.894709	ME6.22,ME7.23,ME8.11	RAGP1_HUMAN	reviewed	Ran GTPase-activating protein 1 (RanGAP1)	RANGAP1 KIAA1835 SD	Homo sapiens (Human)	587
HPV-31_E5	Q96CS3	FAF2	0.000849327	0.677128	1	0.894429	ME6.18,ME7.17,ME9.6	FAF2_HUMAN	reviewed	FAS-associated factor 2 (Protein ETEA) (UBX domain-containing protein 3B) (UBX domain-containing protein 8)	FAF2 ETEA KIAA0887 UBXD8 UBXN3B	Homo sapiens (Human)	445
HPV-31_E1	P14635	CCNB1	0.00209308	0.676391	1	0.894209	ME7.23,ME8.11,ME9.10	CCNB1_HUMAN	reviewed	G2/mitotic-specific cyclin-B1	CCNB1 CCNB	Homo sapiens (Human)	433
HPV-31_E7	O15235	RT12	0.00349668	0.674455	1	0.89362	ME6.23,ME7.19,ME9.8	RT12_HUMAN	reviewed	28S ribosomal protein S12, mitochondrial (MRP-S12) (S12mt) (MT-RPS12)	MRPS12 RPMS12 RPSM12	Homo sapiens (Human)	138
HPV-31_E7	Q15004	PAF15	0.00280007	0.672788	1	0.893102	ME6.23,ME7.19,ME9.8	PAF15_HUMAN	reviewed	PCNA-associated factor (Hepatitis C virus NS5A-transactivated protein 9) (HCV NS5A-transactivated protein 9) (Overexpressed in anaplastic thyroid carcinoma 1) (OEATC-1) (PCNA-associated factor of 15 kDa) (PAF15) (p15PAF)	KIAA0101 NS5ATP9 PAF L5	Homo sapiens (Human)	111
HPV-31_E1	P40939	ECHA	0.00131245	0.671322	1	0.892641	ME6.22,ME7.23,ME8.11	ECHA_HUMAN	reviewed	Trifunctional enzyme subunit alpha, mitochondrial (78 kDa gastrin-binding protein) (TP-alpha) [Includes: Long-chain enoyl-CoA hydratase (EC 4.2.1.17); Long chain 3-hydroxyacyl-CoA dehydrogenase (EC 1.1.1.211)]	HADHA HADH	Homo sapiens (Human)	763
HPV-31_E1	Q9NXF1	TEX10	0.000449143	0.669187	1	0.891977	ME7.23,ME8.11,ME9.10	TEX10_HUMAN	reviewed	Testis-expressed sequence 10 protein	TEX10 L18 Nbla10363	Homo sapiens (Human)	929
HPV-31_E5	Q07065	CKAP4	0.00239638	0.667514	1	0.891472	ME6.18,ME7.17,ME9.6	CKAP4_HUMAN	reviewed	Cytoskeleton-associated protein 4 (63-kDa cytoskeleton-linking membrane protein) (Climp-63) (p63)	CKAP4	Homo sapiens (Human)	602
HPV-31_E6	O75521	ECI2	0.00286526	0.666116	1	0.891044	ME5.18,ME7.18,ME9.5	ECI2_HUMAN	reviewed	Enoyl-CoA delta isomerase 2, mitochondrial (EC 5.3.3.8) (DRS-1) (Delta(3),delta(2)-enoyl-CoA isomerase) (D3,D2-enoyl-CoA isomerase) (Diazepam-binding inhibitor-related protein 1) (DBI-related protein 1) (Dodecenoyl-CoA isomerase) (Hepatocellular carcinoma-associated antigen 88) (Peroxisomal 3,2-trans-enoyl-CoA isomerase) (pECI) (Renal carcinoma antigen NY-REN-1)	ECI2 DRS1 HCA88 PECI	Homo sapiens (Human)	394
HPV-31_E5	Q99615	DNJC7	0.00530221	0.743752	0.963669	0.890106	ME6.18,ME7.17,ME8.6,ME9.6	DNJC7_HUMAN	reviewed	DnaJ homolog subfamily C member 7 (Tetratricopeptide repeat protein 2) (TPR repeat protein 2)	DNAJC7 TPR2 TTC2	Homo sapiens (Human)	494
HPV-31_E1	P62068	UBP46	0.00316444	0.662588	1	0.889957	ME6.22,ME7.23,ME8.11	UBP46_HUMAN	reviewed	Ubiquitin carboxyl-terminal hydrolase 46 (EC 3.4.19.12) (Deubiquitinating enzyme 46) (Ubiquitin thioesterase 46) (Ubiquitin-specific-processing protease 46)	USP46	Homo sapiens (Human)	366
HPV-31_L1	O00629	IMA4	0.000668217	0.847752	0.915983	0.889476	ME6.20,ME7.22,ME8.10,ME9.12	IMA4_HUMAN	reviewed	Importin subunit alpha-4 (Importin alpha Q1) (Qip1) (Karyopherin subunit alpha-4)	KPNA4 QIP1	Homo sapiens (Human)	521
HPV-31_E5	P18859	ATP5J	0.00290809	0.660087	1	0.889184	ME6.18,ME7.17,ME9.6	ATP5J_HUMAN	reviewed	ATP synthase-coupling factor 6, mitochondrial (ATPase subunit F6)	ATP5J ATP5A ATPM	Homo sapiens (Human)	108
HPV-31_E5	P04843	RPN1	0.00106107	0.659367	1	0.888951	ME6.18,ME7.17,ME8.6	RPN1_HUMAN	reviewed	Dolichyl-diphosphooligosaccharide--protein glycosyltransferase subunit 1 (EC 2.4.99.18) (Dolichyl-diphosphooligosaccharide--protein glycosyltransferase 67 kDa subunit) (Ribophorin I) (RPN-I) (Ribophorin-1)	RPN1	Homo sapiens (Human)	607
HPV-31_E5	P11441	UBL4A	0.0029863	0.656275	1	0.888008	ME7.17,ME8.6,ME9.6	UBL4A_HUMAN	reviewed	Ubiquitin-like protein 4A (Ubiquitin-like protein GDX)	UBL4A DXS254E GDX UBL4	Homo sapiens (Human)	157
HPV-31_E5	P06576	ATPB	0.00573846	0.885389	0.896211	0.887565	ME5.14,ME6.18,ME7.17,ME8.6,ME9.6	ATPB_HUMAN	reviewed	ATP synthase subunit beta, mitochondrial (EC 3.6.3.14)	ATP5B ATPMB ATPSB	Homo sapiens (Human)	529
HPV-31_E7	Q14247	SRC8	0.00128965	0.640871	1	0.883246	ME6.23,ME7.19,ME9.8	SRC8_HUMAN	reviewed	Src substrate cortactin (Amplaxin) (Oncogene EMS1)	CTTN EMS1	Homo sapiens (Human)	550
HPV-31_E7	O94973	AP2A2	0.00077383	0.637503	1	0.882203	ME6.23,ME7.19,ME9.8	AP2A2_HUMAN	reviewed	AP-2 complex subunit alpha-2 (100 kDa coated vesicle protein C) (Adapter-related protein complex 2 alpha-2 subunit) (Adaptor protein complex AP-2 subunit alpha-2) (Alpha-adaptin C) (Alpha2-adaptin) (Clathrin assembly protein complex 2 alpha-C large chain) (Huntingtin yeast partner J) (Huntingtin-interacting protein 9) (HIP-9) (Huntingtin-interacting protein J) (Plasma membrane adaptor HA2/AP2 ada…	AP2A2 ADTAB CLAPA2 HIP9 HYPJ KIAA0899	Homo sapiens (Human)	939
HPV-31_L1	Q99832	TCPH	0.000540711	0.637179	1	0.882102	ME6.20,ME7.22,ME9.12	TCPH_HUMAN	reviewed	T-complex protein 1 subunit eta (TCP-1-eta) (CCT-eta) (HIV-1 Nef-interacting protein)	CCT7 CCTH NIP7-1	Homo sapiens (Human)	543
HPV-31_E1	Q92688	AN32B	0.00805508	0.740114	0.950134	0.879722	ME5.21,ME6.22,ME8.11,ME9.10	AN32B_HUMAN	reviewed	Acidic leucine-rich nuclear phosphoprotein 32 family member B (Acidic protein rich in leucines) (Putative HLA-DR-associated protein I-2) (PHAPI2) (Silver-stainable protein SSP29)	ANP32B APRIL PHAPI2	Homo sapiens (Human)	251
HPV-31_E7	Q14186	TFDP1	0.00143148	0.622507	1	0.877581	ME6.23,ME7.19,ME9.8	TFDP1_HUMAN	reviewed	Transcription factor Dp-1 (DRTF1-polypeptide 1) (DRTF1) (E2F dimerization partner 1)	TFDP1 DP1	Homo sapiens (Human)	410
HPV-31_E5	Q9UDY4	DNJB4	0.00235491	0.618558	1	0.876368	ME6.18,ME7.17,ME8.6	DNJB4_HUMAN	reviewed	DnaJ homolog subfamily B member 4 (Heat shock 40 kDa protein 1 homolog) (HSP40 homolog) (Heat shock protein 40 homolog) (Human liver DnaJ-like protein)	DNAJB4 DNAJW HLJ1	Homo sapiens (Human)	337
HPV-31_E8^E2C	Q9NR09	BIRC6	0.000177625	0.61333	1	0.874742	ME6.15,ME7.15,ME9.2	BIRC6_HUMAN	reviewed	Baculoviral IAP repeat-containing protein 6 (EC 6.3.2.-) (BIR repeat-containing ubiquitin-conjugating enzyme) (BRUCE) (Ubiquitin-conjugating BIR domain enzyme apollon) (APOLLON)	BIRC6 KIAA1289	Homo sapiens (Human)	4857
HPV-31_E1^E4	Q9NNW5	WDR6	0.000298815	0.610526	1	0.873877	ME6.16,ME7.16,ME9.3	WDR6_HUMAN	reviewed	WD repeat-containing protein 6	WDR6	Homo sapiens (Human)	1121
HPV-31_E7	Q9ULW0	TPX2	0.00117021	0.582922	1	0.865366	ME6.23,ME7.19,ME9.8	TPX2_HUMAN	reviewed	Targeting protein for Xklp2 (Differentially expressed in cancerous and non-cancerous lung cells 2) (DIL-2) (Hepatocellular carcinoma-associated antigen 519) (Protein fls353) (Restricted expression proliferation-associated protein 100) (p100)	TPX2 C20orf1 C20orf2 DIL2 HCA519	Homo sapiens (Human)	747
HPV-31_E5	P31948	STIP1	0.00369693	0.851454	0.873617	0.861595	ME5.14,ME6.18,ME7.17,ME8.6,ME9.6	STIP1_HUMAN	reviewed	Stress-induced-phosphoprotein 1 (STI1) (Hsc70/Hsp90-organizing protein) (Hop) (Renal carcinoma antigen NY-REN-11) (Transformation-sensitive protein IEF SSP 3521)	STIP1	Homo sapiens (Human)	543
HPV-31_E7	Q16825	PTN21	0.000328104	0.56301	1	0.859218	ME6.23,ME7.19,ME9.8	PTN21_HUMAN	reviewed	Tyrosine-protein phosphatase non-receptor type 21 (EC 3.1.3.48) (Protein-tyrosine phosphatase D1)	PTPN21 PTPD1	Homo sapiens (Human)	1174
HPV-31_L1	P52294	IMA1	0.00109621	0.672755	0.948978	0.858105	ME7.22,ME8.10,ME9.12	IMA1_HUMAN	reviewed	Importin subunit alpha-1 (Karyopherin subunit alpha-1) (Nucleoprotein interactor 1) (NPI-1) (RAG cohort protein 2) (SRP1-beta)	KPNA1 RCH2	Homo sapiens (Human)	538
HPV-31_E6	Q13011	ECH1	0.0122272	0.959944	0.817377	0.856565	ME5.18,ME6.17,ME7.18,ME8.2,ME9.5	ECH1_HUMAN	reviewed	Delta(3,5)-Delta(2,4)-dienoyl-CoA isomerase, mitochondrial (EC 5.3.3.-)	ECH1	Homo sapiens (Human)	328
HPV-31_E7	Q96CW1	AP2M1	0.00157373	0.621763	0.96482	0.853236	ME6.23,ME7.19,ME9.8	AP2M1_HUMAN	reviewed	AP-2 complex subunit mu (AP-2 mu chain) (Adapter-related protein complex 2 mu subunit) (Adaptin-mu2) (Adaptor protein complex AP-2 subunit mu) (Clathrin assembly protein complex 2 medium chain) (Clathrin coat assembly protein AP50) (Clathrin coat-associated protein AP50) (HA2 50 kDa subunit) (Plasma membrane adaptor AP-2 50 kDa protein)	AP2M1 CLAPM1 KIAA0109	Homo sapiens (Human)	435
HPV-31_L2	Q15149	PLEC	0.000105778	0.774511	0.887217	0.847157	ME5.22,ME6.21,ME7.20,ME9.7	PLEC_HUMAN	reviewed	Plectin (PCN) (PLTN) (Hemidesmosomal protein 1) (HD1) (Plectin-1)	PLEC PLEC1	Homo sapiens (Human)	4684
HPV-31_E7	P31040	DHSA	0.000697042	0.616273	0.945624	0.838378	ME6.23,ME7.19,ME9.8	DHSA_HUMAN	reviewed	Succinate dehydrogenase [ubiquinone] flavoprotein subunit, mitochondrial (EC 1.3.5.1) (Flavoprotein subunit of complex II) (Fp)	SDHA SDH2 SDHF	Homo sapiens (Human)	664
HPV-31_E5	P50502	F10A1	0.00254478	0.49199	1	0.837319	ME6.18,ME7.17,ME8.6	F10A1_HUMAN	reviewed	Hsc70-interacting protein (Hip) (Aging-associated protein 2) (Progesterone receptor-associated p48 protein) (Protein FAM10A1) (Putative tumor suppressor ST13) (Renal carcinoma antigen NY-REN-33) (Suppression of tumorigenicity 13 protein)	ST13 AAG2 FAM10A1 HIP SNC6	Homo sapiens (Human)	369
HPV-31_E7	Q13685	AAMP	0.000712352	0.633822	0.932581	0.834851	ME6.23,ME7.19,ME9.8	AAMP_HUMAN	reviewed	Angio-associated migratory cell protein	AAMP	Homo sapiens (Human)	434
HPV-31_L2	Q9UNF1	MAGD2	0.000623102	0.640621	0.909022	0.820798	ME5.22,ME7.20,ME8.7	MAGD2_HUMAN	reviewed	Melanoma-associated antigen D2 (11B6) (Breast cancer-associated gene 1 protein) (BCG-1) (Hepatocellular carcinoma-associated protein JCL-1) (MAGE-D2 antigen)	MAGED2 BCG1	Homo sapiens (Human)	606
HPV-31_E6	Q99460	PSMD1	0.000390957	0.633383	0.910889	0.819843	ME5.18,ME7.18,ME9.5	PSMD1_HUMAN	reviewed	26S proteasome non-ATPase regulatory subunit 1 (26S proteasome regulatory subunit RPN2) (26S proteasome regulatory subunit S1) (26S proteasome subunit p112)	PSMD1	Homo sapiens (Human)	953
HPV-31_E7	P48643	TCPE	0.00638795	0.675321	0.890797	0.819045	ME6.23,ME7.19,ME9.8	TCPE_HUMAN	reviewed	T-complex protein 1 subunit epsilon (TCP-1-epsilon) (CCT-epsilon)	CCT5 CCTE KIAA0098	Homo sapiens (Human)	541
HPV-31_E1	P55084	ECHB	0.00247575	0.927265	0.777393	0.819014	ME5.21,ME6.22,ME7.23,ME8.11,ME9.10	ECHB_HUMAN	reviewed	Trifunctional enzyme subunit beta, mitochondrial (TP-beta) [Includes: 3-ketoacyl-CoA thiolase (EC 2.3.1.16) (Acetyl-CoA acyltransferase) (Beta-ketothiolase)]	HADHB MSTP029	Homo sapiens (Human)	474
HPV-31_E5	Q9NRR5	UBQL4	0.000255246	0.430666	1	0.818385	ME7.17,ME9.6	UBQL4_HUMAN	reviewed	Ubiquilin-4 (Ataxin-1 interacting ubiquitin-like protein) (A1Up) (Ataxin-1 ubiquitin-like-interacting protein A1U) (Connexin43-interacting protein of 75 kDa) (CIP75)	UBQLN4 C1orf6 CIP75 UBIN	Homo sapiens (Human)	601
HPV-31_E6	Q96S55	WRIP1	0.000379854	0.430126	1	0.818219	ME5.18,ME6.17	WRIP1_HUMAN	reviewed	ATPase WRNIP1 (Werner helicase-interacting protein 1)	WRNIP1 WHIP	Homo sapiens (Human)	665
HPV-31_L1	Q9BZ72	PITM2	7.79516e-05	0.430014	1	0.818183	ME8.10,ME9.12	PITM2_HUMAN	reviewed	Membrane-associated phosphatidylinositol transfer protein 2 (Phosphatidylinositol transfer protein, membrane-associated 2) (PITPnm 2) (Pyk2 N-terminal domain-interacting receptor 3) (NIR-3)	PITPNM2 KIAA1457 NIR3	Homo sapiens (Human)	1349
HPV-31_L2	Q5VTR2	BRE1A	0.000272342	0.429569	1	0.818047	ME7.20,ME9.7	BRE1A_HUMAN	reviewed	E3 ubiquitin-protein ligase BRE1A (BRE1-A) (hBRE1) (EC 6.3.2.-) (RING finger protein 20)	RNF20 BRE1A	Homo sapiens (Human)	975
HPV-31_E1	P22492	H1T	0.00204972	0.427613	1	0.817454	ME8.11,ME9.10	H1T_HUMAN	reviewed	Histone H1t (Testicular H1 histone)	HIST1H1T H1FT H1T	Homo sapiens (Human)	207
HPV-31_E7	P60981	DEST	0.000865782	0.425168	1	0.816692	ME6.23,ME7.19	DEST_HUMAN	reviewed	Destrin (Actin-depolymerizing factor) (ADF)	DSTN ACTDP DSN	Homo sapiens (Human)	165
HPV-31_E7	Q03060	CREM	0.00020544	0.425168	1	0.816688	ME6.23,ME7.19	CREM_HUMAN	reviewed	cAMP-responsive element modulator (Inducible cAMP early repressor) (ICER)	CREM	Homo sapiens (Human)	361
HPV-31_L1	Q5JTH9	RRP12	0.000134751	0.424278	1	0.816413	ME6.20,ME9.12	RRP12_HUMAN	reviewed	RRP12-like protein	RRP12 KIAA0690	Homo sapiens (Human)	1297
HPV-31_L1	Q9NW13	RBM28	0.000283603	0.661596	0.893064	0.816328	ME7.22,ME8.10,ME9.12	RBM28_HUMAN	reviewed	RNA-binding protein 28 (RNA-binding motif protein 28)	RBM28	Homo sapiens (Human)	759
HPV-31_E2	Q8TD31	CCHCR	0.000902882	0.422133	1	0.815756	ME7.21,ME9.9	CCHCR_HUMAN	reviewed	Coiled-coil alpha-helical rod protein 1 (Alpha-helical coiled-coil rod protein) (Putative gene 8 protein) (Pg8)	CCHCR1 C6orf18 HCR	Homo sapiens (Human)	782
HPV-31_L1	Q8WZ42	TITIN	3.6229e-06	0.418216	1	0.814542	ME6.20,ME9.12	TITIN_HUMAN	reviewed	Titin (EC 2.7.11.1) (Connectin) (Rhabdomyosarcoma antigen MU-RMS-40.14)	TTN	Homo sapiens (Human)	34350
HPV-31_E7	P33992	MCM5	0.000210292	0.417835	1	0.814426	ME7.19,ME9.8	MCM5_HUMAN	reviewed	DNA replication licensing factor MCM5 (EC 3.6.4.12) (CDC46 homolog) (P1-CDC46)	MCM5 CDC46	Homo sapiens (Human)	734
HPV-31_E7	Q14188	TFDP2	0.00023323	0.416918	1	0.814143	ME6.23,ME7.19	TFDP2_HUMAN	reviewed	Transcription factor Dp-2 (E2F dimerization partner 2)	TFDP2 DP2	Homo sapiens (Human)	446
HPV-31_E1	Q9BV38	WDR18	0.00118269	0.416849	1	0.814127	ME7.23,ME9.10	WDR18_HUMAN	reviewed	WD repeat-containing protein 18	WDR18	Homo sapiens (Human)	432
HPV-31_E1^E4	P05114	HMGN1	0.00152192	0.41627	1	0.813951	ME6.16,ME9.3	HMGN1_HUMAN	reviewed	Non-histone chromosomal protein HMG-14 (High mobility group nucleosome-binding domain-containing protein 1)	HMGN1 HMG14	Homo sapiens (Human)	100
HPV-31_E8^E2C	O43149	ZZEF1	0.000261707	0.414637	1	0.813439	ME7.15,ME9.2	ZZEF1_HUMAN	reviewed	Zinc finger ZZ-type and EF-hand domain-containing protein 1	ZZEF1 KIAA0399	Homo sapiens (Human)	2961
HPV-31_E1	O43423	AN32C	0.00162755	0.408762	1	0.811635	ME5.21,ME6.22	AN32C_HUMAN	reviewed	Acidic leucine-rich nuclear phosphoprotein 32 family member C (Phosphoprotein 32-related protein 1) (Tumorigenic protein pp32r1)	ANP32C PP32R1	Homo sapiens (Human)	234
HPV-31_E2	P61981	1433G	0.00074763	0.408712	1	0.811614	ME7.21,ME9.9	1433G_HUMAN	reviewed	14-3-3 protein gamma (Protein kinase C inhibitor protein 1) (KCIP-1) [Cleaved into: 14-3-3 protein gamma, N-terminally processed]	YWHAG	Homo sapiens (Human)	247
HPV-31_E2	Q9UL42	PNMA2	0.000254829	0.408712	1	0.811611	ME7.21,ME9.9	PNMA2_HUMAN	reviewed	Paraneoplastic antigen Ma2 (40 kDa neuronal protein) (Onconeuronal antigen Ma2) (Paraneoplastic neuronal antigen MM2)	PNMA2 KIAA0883 MA2	Homo sapiens (Human)	364
HPV-31_E2	P68400	CSK21	0.000234318	0.408712	1	0.811611	ME7.21,ME9.9	CSK21_HUMAN	reviewed	Casein kinase II subunit alpha (CK II alpha) (EC 2.7.11.1)	CSNK2A1 CK2A1	Homo sapiens (Human)	391
HPV-31_E2	Q9Y230	RUVB2	0.000206603	0.408712	1	0.811611	ME7.21,ME9.9	RUVB2_HUMAN	reviewed	RuvB-like 2 (EC 3.6.4.12) (48 kDa TATA box-binding protein-interacting protein) (48 kDa TBP-interacting protein) (51 kDa erythrocyte cytosolic protein) (ECP-51) (INO80 complex subunit J) (Repressing pontin 52) (Reptin 52) (TIP49b) (TIP60-associated protein 54-beta) (TAP54-beta)	RUVBL2 INO80J TIP48 TIP49B CGI-46	Homo sapiens (Human)	463
HPV-31_E7	Q2M2I8	AAK1	0.000475151	0.408561	1	0.811566	ME6.23,ME7.19	AAK1_HUMAN	reviewed	AP2-associated protein kinase 1 (EC 2.7.11.1) (Adaptor-associated kinase 1)	AAK1 KIAA1048	Homo sapiens (Human)	961
HPV-31_E2	Q13136	LIPA1	0.000540512	0.407474	1	0.811231	ME7.21,ME9.9	LIPA1_HUMAN	reviewed	Liprin-alpha-1 (LAR-interacting protein 1) (LIP-1) (Protein tyrosine phosphatase receptor type f polypeptide-interacting protein alpha-1) (PTPRF-interacting protein alpha-1)	PPFIA1 LIP1	Homo sapiens (Human)	1202
HPV-31_E6	A6NKD9	CC85C	0.000245287	0.404344	1	0.810264	ME5.18,ME7.18	CC85C_HUMAN	reviewed	Coiled-coil domain-containing protein 85C	CCDC85C	Homo sapiens (Human)	419
HPV-31_E1	Q09019	DMWD	0.000272186	0.403537	1	0.810015	ME8.11,ME9.10	DMWD_HUMAN	reviewed	Dystrophia myotonica WD repeat-containing protein (Dystrophia myotonica-containing WD repeat motif protein) (Protein 59) (Protein DMR-N9)	DMWD DM9	Homo sapiens (Human)	674
HPV-31_E7	P63010	AP2B1	0.000867747	0.402215	1	0.809611	ME6.23,ME7.19	AP2B1_HUMAN	reviewed	AP-2 complex subunit beta (AP105B) (Adapter-related protein complex 2 beta subunit) (Adaptor protein complex AP-2 subunit beta) (Beta-2-adaptin) (Beta-adaptin) (Clathrin assembly protein complex 2 beta large chain) (Plasma membrane adaptor HA2/AP2 adaptin beta subunit)	AP2B1 ADTB2 CLAPB1	Homo sapiens (Human)	937
HPV-31_E1	Q14145	KEAP1	0.000303196	0.40182	1	0.809485	ME6.22,ME7.23	KEAP1_HUMAN	reviewed	Kelch-like ECH-associated protein 1 (Cytosolic inhibitor of Nrf2) (INrf2) (Kelch-like protein 19)	KEAP1 INRF2 KIAA0132 KLHL19	Homo sapiens (Human)	624
HPV-31_L2	P22695	QCR2	0.000346094	0.401285	1	0.809321	ME7.20,ME9.7	QCR2_HUMAN	reviewed	Cytochrome b-c1 complex subunit 2, mitochondrial (Complex III subunit 2) (Core protein II) (Ubiquinol-cytochrome-c reductase complex core protein 2)	UQCRC2	Homo sapiens (Human)	453
HPV-31_E7	Q9BRP1	PDD2L	0.00067049	0.399628	1	0.808811	ME6.23,ME7.19	PDD2L_HUMAN	reviewed	Programmed cell death protein 2-like	PDCD2L	Homo sapiens (Human)	358
HPV-31_E7	Q14680	MELK	0.000354034	0.399628	1	0.808809	ME6.23,ME7.19	MELK_HUMAN	reviewed	Maternal embryonic leucine zipper kinase (hMELK) (EC 2.7.11.1) (Protein kinase Eg3) (pEg3 kinase) (Protein kinase PK38) (hPK38) (Tyrosine-protein kinase MELK) (EC 2.7.10.2)	MELK KIAA0175	Homo sapiens (Human)	651
HPV-31_L1	Q9NUD5	ZCHC3	0.000373831	0.398205	1	0.80837	ME7.22,ME9.12	ZCHC3_HUMAN	reviewed	Zinc finger CCHC domain-containing protein 3	ZCCHC3 C20orf99	Homo sapiens (Human)	404
HPV-31_E5	P55060	XPO2	0.000219614	0.395806	1	0.807629	ME6.18,ME7.17	XPO2_HUMAN	reviewed	Exportin-2 (Exp2) (Cellular apoptosis susceptibility protein) (Chromosome segregation 1-like protein) (Importin-alpha re-exporter)	CSE1L CAS XPO2	Homo sapiens (Human)	971
HPV-31_E7	Q6AWC2	WWC2	0.000155157	0.394967	1	0.80737	ME7.19,ME9.8	WWC2_HUMAN	reviewed	Protein WWC2 (BH-3-only member B) (WW domain-containing protein 2)	WWC2 BOMB	Homo sapiens (Human)	1192
HPV-31_E5	Q9NYP7	ELOV5	0.000347654	0.394358	1	0.807183	ME7.17,ME9.6	ELOV5_HUMAN	reviewed	Elongation of very long chain fatty acids protein 5 (EC 2.3.1.199) (3-keto acyl-CoA synthase ELOVL5) (ELOVL fatty acid elongase 5) (ELOVL FA elongase 5) (Fatty acid elongase 1) (hELO1) (Very-long-chain 3-oxoacyl-CoA synthase 5)	ELOVL5 ELOVL2 PRO0530	Homo sapiens (Human)	299
HPV-31_E5	Q9UBM7	DHCR7	0.000224746	0.394358	1	0.807183	ME7.17,ME9.6	DHCR7_HUMAN	reviewed	7-dehydrocholesterol reductase (7-DHC reductase) (EC 1.3.1.21) (Putative sterol reductase SR-2) (Sterol Delta(7)-reductase)	DHCR7 D7SR	Homo sapiens (Human)	475
HPV-31_E5	Q9H3U1	UN45A	0.000118729	0.394358	1	0.807182	ME7.17,ME9.6	UN45A_HUMAN	reviewed	Protein unc-45 homolog A (Unc-45A) (GCUNC-45) (Smooth muscle cell-associated protein 1) (SMAP-1)	UNC45A SMAP1	Homo sapiens (Human)	944
HPV-31_E8^E2C	Q5T447	HECD3	0.000806477	0.39007	1	0.805863	ME7.15,ME9.2	HECD3_HUMAN	reviewed	E3 ubiquitin-protein ligase HECTD3 (EC 6.3.2.-) (HECT domain-containing protein 3)	HECTD3	Homo sapiens (Human)	861
HPV-31_E6	P17980	PRS6A	0.00254085	0.955007	0.744059	0.804723	ME5.18,ME6.17,ME7.18,ME8.2,ME9.5	PRS6A_HUMAN	reviewed	26S protease regulatory subunit 6A (26S proteasome AAA-ATPase subunit RPT5) (Proteasome 26S subunit ATPase 3) (Proteasome subunit P50) (Tat-binding protein 1) (TBP-1)	PSMC3 TBP1	Homo sapiens (Human)	439
HPV-31_L2	Q9UJS0	CMC2	0.000380525	0.384386	1	0.804107	ME6.21,ME7.20	CMC2_HUMAN	reviewed	Calcium-binding mitochondrial carrier protein Aralar2 (Citrin) (Mitochondrial aspartate glutamate carrier 2) (Solute carrier family 25 member 13)	SLC25A13 ARALAR2	Homo sapiens (Human)	675
HPV-31_L1	Q7Z739	YTHD3	0.000566644	0.382705	1	0.803589	ME7.22,ME9.12	YTHD3_HUMAN	reviewed	YTH domain family protein 3	YTHDF3	Homo sapiens (Human)	585
HPV-31_E7	Q6ZSR9	YJ005	0.00078714	0.38133	1	0.803166	ME6.23,ME7.19	YJ005_HUMAN	reviewed	Uncharacterized protein FLJ45252		Homo sapiens (Human)	355
HPV-31_E7	P21912	DHSB	0.000473107	0.38133	1	0.803165	ME6.23,ME7.19	DHSB_HUMAN	reviewed	Succinate dehydrogenase [ubiquinone] iron-sulfur subunit, mitochondrial (EC 1.3.5.1) (Iron-sulfur subunit of complex II) (Ip)	SDHB SDH SDH1	Homo sapiens (Human)	280
HPV-31_L1	Q6DKI1	RL7L	0.000415252	0.380471	1	0.802899	ME6.20,ME7.22	RL7L_HUMAN	reviewed	60S ribosomal protein L7-like 1	RPL7L1	Homo sapiens (Human)	246
HPV-31_E2	P35222	CTNB1	0.000260086	0.379827	1	0.8027	ME7.21,ME9.9	CTNB1_HUMAN	reviewed	Catenin beta-1 (Beta-catenin)	CTNNB1 CTNNB OK/SW-cl.35 PRO2286	Homo sapiens (Human)	781
HPV-31_E2	P25054	APC	0.000142666	0.379827	1	0.802699	ME7.21,ME9.9	APC_HUMAN	reviewed	Adenomatous polyposis coli protein (Protein APC) (Deleted in polyposis 2.5)	APC DP2.5	Homo sapiens (Human)	2843
HPV-31_E7	O95782	AP2A1	0.000708895	0.363415	1	0.797639	ME7.19,ME9.8	AP2A1_HUMAN	reviewed	AP-2 complex subunit alpha-1 (100 kDa coated vesicle protein A) (Adapter-related protein complex 2 alpha-1 subunit) (Adaptor protein complex AP-2 subunit alpha-1) (Alpha-adaptin A) (Alpha1-adaptin) (Clathrin assembly protein complex 2 alpha-A large chain) (Plasma membrane adaptor HA2/AP2 adaptin alpha A subunit)	AP2A1 ADTAA CLAPA1	Homo sapiens (Human)	977
HPV-31_E1	P27694	RFA1	0.000369798	0.361697	1	0.797107	ME7.23,ME9.10	RFA1_HUMAN	reviewed	Replication protein A 70 kDa DNA-binding subunit (RP-A p70) (Replication factor A protein 1) (RF-A protein 1) (Single-stranded DNA-binding protein)	RPA1 REPA1 RPA70	Homo sapiens (Human)	616
HPV-31_E7	P46937	YAP1	0.000507472	0.350093	1	0.793527	ME7.19,ME9.8	YAP1_HUMAN	reviewed	Yorkie homolog (65 kDa Yes-associated protein) (YAP65)	YAP1 YAP65	Homo sapiens (Human)	504
HPV-31_E5	O15260	SURF4	0.000532773	0.349548	1	0.793359	ME7.17,ME8.6	SURF4_HUMAN	reviewed	Surfeit locus protein 4	SURF4 SURF-4	Homo sapiens (Human)	269
HPV-31_E7	Q9UPQ3	AGAP1	0.000195	0.346806	1	0.792511	ME6.23,ME7.19	AGAP1_HUMAN	reviewed	Arf-GAP with GTPase, ANK repeat and PH domain-containing protein 1 (AGAP-1) (Centaurin-gamma-2) (Cnt-g2) (GTP-binding and GTPase-activating protein 1) (GGAP1)	AGAP1 CENTG2 KIAA1099	Homo sapiens (Human)	857
HPV-31_E7	Q8IWV8	UBR2	9.17771e-05	0.346806	1	0.792511	ME6.23,ME7.19	UBR2_HUMAN	reviewed	E3 ubiquitin-protein ligase UBR2 (EC 6.3.2.-) (N-recognin-2) (Ubiquitin-protein ligase E3-alpha-2) (Ubiquitin-protein ligase E3-alpha-II)	UBR2 C6orf133 KIAA0349	Homo sapiens (Human)	1755
HPV-31_E1^E4	P27694	RFA1	0.000758732	0.345494	1	0.79211	ME6.16,ME9.3	RFA1_HUMAN	reviewed	Replication protein A 70 kDa DNA-binding subunit (RP-A p70) (Replication factor A protein 1) (RF-A protein 1) (Single-stranded DNA-binding protein)	RPA1 REPA1 RPA70	Homo sapiens (Human)	616
HPV-31_L2	P34932	HSP74	0.00926344	0.87234	0.75169	0.784489	ME5.22,ME6.21,ME7.20,ME8.7,ME9.7	HSP74_HUMAN	reviewed	Heat shock 70 kDa protein 4 (HSP70RY) (Heat shock 70-related protein APG-2)	HSPA4 APG2	Homo sapiens (Human)	840
HPV-31_E2	Q9Y2S7	PDIP2	0.00210284	0.318461	1	0.783777	ME5.20,ME6.19	PDIP2_HUMAN	reviewed	Polymerase delta-interacting protein 2 (38 kDa DNA polymerase delta interaction protein) (p38)	POLDIP2 PDIP38 POLD4 HSPC017	Homo sapiens (Human)	368
HPV-31_E7	O60701	UGDH	0.000310242	0.313694	1	0.782296	ME6.23,ME7.19	UGDH_HUMAN	reviewed	UDP-glucose 6-dehydrogenase (UDP-Glc dehydrogenase) (UDP-GlcDH) (UDPGDH) (EC 1.1.1.22)	UGDH	Homo sapiens (Human)	494
HPV-31_E6	Q99436	PSB7	0.00216888	0.662918	0.84254	0.782113	ME5.18,ME6.17,ME8.2	PSB7_HUMAN	reviewed	Proteasome subunit beta type-7 (EC 3.4.25.1) (Macropain chain Z) (Multicatalytic endopeptidase complex chain Z) (Proteasome subunit Z)	PSMB7 Z	Homo sapiens (Human)	277
HPV-31_E7	Q5H9I0	TFDP3	0.000384697	0.311666	1	0.781671	ME7.19,ME9.8	TFDP3_HUMAN	reviewed	Transcription factor Dp family member 3 (Cancer/testis antigen 30) (CT30) (Hepatocellular carcinoma-associated antigen 661)	TFDP3 DP4 HCA661	Homo sapiens (Human)	405
HPV-31_E5	P42771	CD2A1	0.0012232	0.311376	1	0.781586	ME6.18,ME7.17	CD2A1_HUMAN	reviewed	Cyclin-dependent kinase inhibitor 2A, isoforms 1/2/3 (Cyclin-dependent kinase 4 inhibitor A) (CDK4I) (Multiple tumor suppressor 1) (MTS-1) (p16-INK4a) (p16-INK4) (p16INK4A)	CDKN2A CDKN2 MTS1	Homo sapiens (Human)	156
HPV-31_E5	P17302	CXA1	0.00094092	0.311376	1	0.781584	ME6.18,ME7.17	CXA1_HUMAN	reviewed	Gap junction alpha-1 protein (Connexin-43) (Cx43) (Gap junction 43 kDa heart protein)	GJA1 GJAL	Homo sapiens (Human)	382
HPV-31_E5	Q9BV68	RN126	0.000568048	0.311376	1	0.781582	ME6.18,ME7.17	RN126_HUMAN	reviewed	RING finger protein 126	RNF126	Homo sapiens (Human)	326
HPV-31_E6	P55036	PSMD4	0.00486828	0.851862	0.753965	0.779704	ME5.18,ME7.18,ME8.2,ME9.5	PSMD4_HUMAN	reviewed	26S proteasome non-ATPase regulatory subunit 4 (26S proteasome regulatory subunit RPN10) (26S proteasome regulatory subunit S5A) (Antisecretory factor 1) (AF) (ASF) (Multiubiquitin chain-binding protein)	PSMD4 MCB1	Homo sapiens (Human)	377
HPV-31_E1	Q9BTT0	AN32E	0.00225282	0.505021	0.906959	0.777557	ME5.21,ME6.22,ME7.23	AN32E_HUMAN	reviewed	Acidic leucine-rich nuclear phosphoprotein 32 family member E (LANP-like protein) (LANP-L)	ANP32E	Homo sapiens (Human)	268
HPV-31_E7	P27816	MAP4	0.000314969	0.293844	1	0.776172	ME7.19,ME9.8	MAP4_HUMAN	reviewed	Microtubule-associated protein 4 (MAP-4)	MAP4	Homo sapiens (Human)	1152
HPV-31_E8^E2C	Q9UQ52	CNTN6	0.000213532	0.285526	1	0.773605	ME6.15,ME7.15	CNTN6_HUMAN	reviewed	Contactin-6 (Neural recognition molecule NB-3) (hNB-3)	CNTN6	Homo sapiens (Human)	1028
HPV-31_E2	Q15154	PCM1	0.000233412	0.23443	1	0.75784	ME7.21,ME9.9	PCM1_HUMAN	reviewed	Pericentriolar material 1 protein (PCM-1) (hPCM-1)	PCM1	Homo sapiens (Human)	2024
HPV-31_E5	Q9Y277	VDAC3	0.00118764	0.217166	1	0.752519	ME6.18,ME7.17	VDAC3_HUMAN	reviewed	Voltage-dependent anion-selective channel protein 3 (VDAC-3) (hVDAC3) (Outer mitochondrial membrane protein porin 3)	VDAC3	Homo sapiens (Human)	283
HPV-31_E6	Q15008	PSMD6	0.000705159	0.663546	0.798291	0.751965	ME5.18,ME6.17,ME7.18	PSMD6_HUMAN	reviewed	26S proteasome non-ATPase regulatory subunit 6 (26S proteasome regulatory subunit RPN7) (26S proteasome regulatory subunit S10) (Breast cancer-associated protein SGA-113M) (Phosphonoformate immuno-associated protein 4) (Proteasome regulatory particle subunit p44S10) (p42A)	PSMD6 KIAA0107 PFAAP4	Homo sapiens (Human)	389
HPV-31_L1	Q07666	KHDR1	0.00215581	0.421448	0.906728	0.751613	ME7.22,ME9.12	KHDR1_HUMAN	reviewed	KH domain-containing, RNA-binding, signal transduction-associated protein 1 (GAP-associated tyrosine phosphoprotein p62) (Src-associated in mitosis 68 kDa protein) (Sam68) (p21 Ras GTPase-activating protein-associated p62) (p68)	KHDRBS1 SAM68	Homo sapiens (Human)	443
HPV-31_E7	P13995	MTDC	0.000845647	0.425168	0.899286	0.747651	ME6.23,ME7.19	MTDC_HUMAN	reviewed	Bifunctional methylenetetrahydrofolate dehydrogenase/cyclohydrolase, mitochondrial [Includes: NAD-dependent methylenetetrahydrofolate dehydrogenase (EC 1.5.1.15); Methenyltetrahydrofolate cyclohydrolase (EC 3.5.4.9)]	MTHFD2 NMDMC	Homo sapiens (Human)	350
HPV-31_E7	P63104	1433Z	0.00139004	0.562662	0.832108	0.744025	ME5.19,ME6.23,ME7.19	1433Z_HUMAN	reviewed	14-3-3 protein zeta/delta (Protein kinase C inhibitor protein 1) (KCIP-1)	YWHAZ	Homo sapiens (Human)	245
HPV-31_E7	Q96T17	MA7D2	0.000321736	0.674028	0.775923	0.739863	ME6.23,ME7.19,ME9.8	MA7D2_HUMAN	reviewed	MAP7 domain-containing protein 2	MAP7D2	Homo sapiens (Human)	732
HPV-31_E5	P55072	TERA	0.000644417	0.65692	0.780268	0.737565	ME5.14,ME7.17,ME8.6	TERA_HUMAN	reviewed	Transitional endoplasmic reticulum ATPase (TER ATPase) (EC 3.6.4.6) (15S Mg(2+)-ATPase p97 subunit) (Valosin-containing protein) (VCP)	VCP	Homo sapiens (Human)	806
HPV-31_E5	Q9P035	HACD3	0.000655782	0.424459	0.884793	0.737497	ME6.18,ME7.17	HACD3_HUMAN	reviewed	Very-long-chain (3R)-3-hydroxyacyl-[acyl-carrier protein] dehydratase 3 (EC 4.2.1.134) (3-hydroxyacyl-CoA dehydratase 3) (HACD3) (Butyrate-induced protein 1) (B-ind1) (hB-ind1) (Protein tyrosine phosphatase-like protein PTPLAD1) (Protein-tyrosine phosphatase-like A domain-containing protein 1)	PTPLAD1 BIND1 HACD3	Homo sapiens (Human)	362
HPV-31_E5	P27824	CALX	0.000418675	0.424459	0.884793	0.737495	ME6.18,ME7.17	CALX_HUMAN	reviewed	Calnexin (IP90) (Major histocompatibility complex class I antigen-binding protein p88) (p90)	CANX	Homo sapiens (Human)	592
HPV-31_L2	Q96EY1	DNJA3	0.00114881	0.759732	0.731268	0.735699	ME6.21,ME7.20,ME8.7,ME9.7	DNJA3_HUMAN	reviewed	DnaJ homolog subfamily A member 3, mitochondrial (DnaJ protein Tid-1) (hTid-1) (Hepatocellular carcinoma-associated antigen 57) (Tumorous imaginal discs protein Tid56 homolog)	DNAJA3 HCA57 TID1	Homo sapiens (Human)	480
HPV-31_E5	P28066	PSA5	0.00107057	0.424409	0.87786	0.732731	ME6.18,ME8.6	PSA5_HUMAN	reviewed	Proteasome subunit alpha type-5 (EC 3.4.25.1) (Macropain zeta chain) (Multicatalytic endopeptidase complex zeta chain) (Proteasome zeta chain)	PSMA5	Homo sapiens (Human)	241
HPV-31_E6	O43242	PSMD3	0.000936994	0.620088	0.779107	0.725407	ME5.18,ME7.18,ME9.5	PSMD3_HUMAN	reviewed	26S proteasome non-ATPase regulatory subunit 3 (26S proteasome regulatory subunit RPN3) (26S proteasome regulatory subunit S3) (Proteasome subunit p58)	PSMD3	Homo sapiens (Human)	534
HPV-31_E5	P25787	PSA2	0.0042311	0.791728	0.701167	0.724954	ME6.18,ME7.17,ME8.6,ME9.6	PSA2_HUMAN	reviewed	Proteasome subunit alpha type-2 (EC 3.4.25.1) (Macropain subunit C3) (Multicatalytic endopeptidase complex subunit C3) (Proteasome component C3)	PSMA2 HC3 PSC3	Homo sapiens (Human)	234
HPV-31_E7	P20248	CCNA2	0.00291375	0.760143	0.714977	0.724668	ME6.23,ME7.19,ME8.8,ME9.8	CCNA2_HUMAN	reviewed	Cyclin-A2 (Cyclin-A)	CCNA2 CCN1 CCNA	Homo sapiens (Human)	432
HPV-31_E1^E4	Q9NYF8	BCLF1	0.000136033	0.425821	0.85697	0.718841	ME7.16,ME9.3	BCLF1_HUMAN	reviewed	Bcl-2-associated transcription factor 1 (Btf)	BCLAF1 BTF KIAA0164	Homo sapiens (Human)	920
HPV-31_L2	O95757	HS74L	0.00101443	0.805756	0.682165	0.716237	ME5.22,ME6.21,ME7.20,ME8.7	HS74L_HUMAN	reviewed	Heat shock 70 kDa protein 4L (Heat shock 70-related protein APG-1) (Osmotic stress protein 94)	HSPA4L APG1 OSP94	Homo sapiens (Human)	839
HPV-31_E7	P49368	TCPG	0.00215874	0.593439	0.776909	0.715686	ME6.23,ME7.19,ME9.8	TCPG_HUMAN	reviewed	T-complex protein 1 subunit gamma (TCP-1-gamma) (CCT-gamma) (hTRiC5)	CCT3 CCTG TRIC5	Homo sapiens (Human)	545
HPV-31_E1	Q96HS1	PGAM5	0.00770665	0.91452	0.629928	0.714025	ME5.21,ME6.22,ME7.23,ME8.11,ME9.10	PGAM5_HUMAN	reviewed	Serine/threonine-protein phosphatase PGAM5, mitochondrial (EC 3.1.3.16) (Bcl-XL-binding protein v68) (Phosphoglycerate mutase family member 5)	PGAM5	Homo sapiens (Human)	289
HPV-31_E6	Q14974	IMB1	0.000622438	0.803132	0.676903	0.711818	ME5.18,ME6.17,ME7.18,ME9.5	IMB1_HUMAN	reviewed	Importin subunit beta-1 (Importin-90) (Karyopherin subunit beta-1) (Nuclear factor p97) (Pore targeting complex 97 kDa subunit) (PTAC97)	KPNB1 NTF97	Homo sapiens (Human)	876
HPV-31_E7	P24941	CDK2	0.00533865	0.781989	0.67979	0.707301	ME6.23,ME7.19,ME8.8,ME9.8	CDK2_HUMAN	reviewed	Cyclin-dependent kinase 2 (EC 2.7.11.22) (Cell division protein kinase 2) (p33 protein kinase)	CDK2 CDKN2	Homo sapiens (Human)	298
HPV-31_E6	P62333	PRS10	0.00200036	0.757679	0.687727	0.705222	ME5.18,ME7.18,ME8.2,ME9.5	PRS10_HUMAN	reviewed	26S protease regulatory subunit 10B (26S proteasome AAA-ATPase subunit RPT4) (Proteasome 26S subunit ATPase 6) (Proteasome subunit p42)	PSMC6 SUG2	Homo sapiens (Human)	389
HPV-31_E5	P49720	PSB3	0.00230498	0.839535	0.649803	0.704482	ME6.18,ME7.17,ME8.6,ME9.6	PSB3_HUMAN	reviewed	Proteasome subunit beta type-3 (EC 3.4.25.1) (Proteasome chain 13) (Proteasome component C10-II) (Proteasome theta chain)	PSMB3	Homo sapiens (Human)	205
HPV-31_E5	O94905	ERLN2	0.00118757	0.427765	0.831754	0.702161	ME7.17,ME9.6	ERLN2_HUMAN	reviewed	Erlin-2 (Endoplasmic reticulum lipid raft-associated protein 2) (Stomatin-prohibitin-flotillin-HflC/K domain-containing protein 2) (SPFH domain-containing protein 2)	ERLIN2 C8orf2 SPFH2 UNQ2441/PRO5003/PRO9924	Homo sapiens (Human)	339
HPV-31_E1^E4	Q9Y5V3	MAGD1	0.000347005	0.54535	0.773942	0.698804	ME6.16,ME7.16,ME9.3	MAGD1_HUMAN	reviewed	Melanoma-associated antigen D1 (MAGE tumor antigen CCF) (MAGE-D1 antigen) (Neurotrophin receptor-interacting MAGE homolog)	MAGED1 NRAGE PP2250 PRO2292	Homo sapiens (Human)	778
HPV-31_L1	P57053	H2BFS	0.0035028	6.21335e-11	1	0.685531	ME8.10	H2BFS_HUMAN	reviewed	Histone H2B type F-S (Histone H2B.s) (H2B/s)	H2BFS	Homo sapiens (Human)	126
HPV-31_L1	P58876	H2B1D	0.0035028	6.21335e-11	1	0.685531	ME8.10	H2B1D_HUMAN	reviewed	Histone H2B type 1-D (HIRA-interacting protein 2) (Histone H2B.1 B) (Histone H2B.b) (H2B/b)	HIST1H2BD H2BFB HIRIP2	Homo sapiens (Human)	126
HPV-31_L1	P62807	H2B1C	0.0035028	6.21335e-11	1	0.685531	ME8.10	H2B1C_HUMAN	reviewed	Histone H2B type 1-C/E/F/G/I (Histone H2B.1 A) (Histone H2B.a) (H2B/a) (Histone H2B.g) (H2B/g) (Histone H2B.h) (H2B/h) (Histone H2B.k) (H2B/k) (Histone H2B.l) (H2B/l)	HIST1H2BC H2BFL; HIST1H2BE H2BFH; HIST1H2BF H2BFG; HIST1H2BG H2BFA; HIST1H2BI H2BFK	Homo sapiens (Human)	126
HPV-31_L1	Q5QNW6	H2B2F	0.0035028	6.21335e-11	1	0.685531	ME8.10	H2B2F_HUMAN	reviewed	Histone H2B type 2-F	HIST2H2BF	Homo sapiens (Human)	126
HPV-31_L1	Q93079	H2B1H	0.0035028	6.21335e-11	1	0.685531	ME8.10	H2B1H_HUMAN	reviewed	Histone H2B type 1-H (Histone H2B.j) (H2B/j)	HIST1H2BH H2BFJ	Homo sapiens (Human)	126
HPV-31_L1	Q99877	H2B1N	0.0035028	6.21335e-11	1	0.685531	ME8.10	H2B1N_HUMAN	reviewed	Histone H2B type 1-N (Histone H2B.d) (H2B/d)	HIST1H2BN H2BFD	Homo sapiens (Human)	126
HPV-31_L1	Q99880	H2B1L	0.0035028	6.21335e-11	1	0.685531	ME8.10	H2B1L_HUMAN	reviewed	Histone H2B type 1-L (Histone H2B.c) (H2B/c)	HIST1H2BL H2BFC	Homo sapiens (Human)	126
HPV-31_L1	Q99879	H2B1M	0.00347522	6.21335e-11	1	0.685531	ME8.10	H2B1M_HUMAN	reviewed	Histone H2B type 1-M (Histone H2B.e) (H2B/e)	HIST1H2BM H2BFE	Homo sapiens (Human)	126
HPV-31_E5	P35232	PHB	0.0024529	6.21335e-11	1	0.685525	ME7.17	PHB_HUMAN	reviewed	Prohibitin	PHB	Homo sapiens (Human)	272
HPV-31_E2	P14923	PLAK	0.00206504	6.21335e-11	1	0.685522	ME8.9	PLAK_HUMAN	reviewed	Junction plakoglobin (Catenin gamma) (Desmoplakin III) (Desmoplakin-3)	JUP CTNNG DP3	Homo sapiens (Human)	745
HPV-31_E5	P40305	IFI27	0.0014381	6.21335e-11	1	0.685519	ME6.18	IFI27_HUMAN	reviewed	Interferon alpha-inducible protein 27, mitochondrial (p27) (Interferon alpha-induced 11.5 kDa protein) (Interferon-stimulated gene 12a protein) (ISG12(a))	IFI27	Homo sapiens (Human)	119
HPV-31_E2	P0C867	YB052	0.00138707	6.21335e-11	1	0.685518	ME6.19	YB052_HUMAN	reviewed	Putative uncharacterized protein LOC100130201		Homo sapiens (Human)	120
HPV-31_E2	Q02413	DSG1	0.00129839	6.21335e-11	1	0.685518	ME8.9	DSG1_HUMAN	reviewed	Desmoglein-1 (Cadherin family member 4) (Desmosomal glycoprotein 1) (DG1) (DGI) (Pemphigus foliaceus antigen)	DSG1 CDHF4	Homo sapiens (Human)	1049
HPV-31_E2	O76031	CLPX	0.00126282	6.21335e-11	1	0.685518	ME5.20	CLPX_HUMAN	reviewed	ATP-dependent Clp protease ATP-binding subunit clpX-like, mitochondrial	CLPX	Homo sapiens (Human)	633
HPV-31_E2	O60812	HNRCL	0.00114955	6.21335e-11	1	0.685517	ME6.19	HNRCL_HUMAN	reviewed	Heterogeneous nuclear ribonucleoprotein C-like 1 (hnRNP C-like-1) (hnRNP core protein C-like 1)	HNRNPCL1 HNRPCL1	Homo sapiens (Human)	293
HPV-31_E2	Q9NY12	GAR1	0.000944781	6.21335e-11	1	0.685516	ME8.9	GAR1_HUMAN	reviewed	H/ACA ribonucleoprotein complex subunit 1 (Nucleolar protein family A member 1) (snoRNP protein GAR1)	GAR1 NOLA1	Homo sapiens (Human)	217
HPV-31_L2	P04792	HSPB1	0.000894573	6.21335e-11	1	0.685515	ME7.20	HSPB1_HUMAN	reviewed	Heat shock protein beta-1 (HspB1) (28 kDa heat shock protein) (Estrogen-regulated 24 kDa protein) (Heat shock 27 kDa protein) (HSP 27) (Stress-responsive protein 27) (SRP27)	HSPB1 HSP27 HSP28	Homo sapiens (Human)	205
HPV-31_E5	Q06323	PSME1	0.000877575	6.21335e-11	1	0.685515	ME5.14	PSME1_HUMAN	reviewed	Proteasome activator complex subunit 1 (11S regulator complex subunit alpha) (REG-alpha) (Activator of multicatalytic protease subunit 1) (Interferon gamma up-regulated I-5111 protein) (IGUP I-5111) (Proteasome activator 28 subunit alpha) (PA28a) (PA28alpha)	PSME1 IFI5111	Homo sapiens (Human)	249
HPV-31_L2	A6NHL2	TBAL3	0.000781953	6.21335e-11	1	0.685515	ME6.21	TBAL3_HUMAN	reviewed	Tubulin alpha chain-like 3	TUBAL3	Homo sapiens (Human)	446
HPV-31_L1	P57057	GLPT	0.000776427	6.21335e-11	1	0.685515	ME5.23	GLPT_HUMAN	reviewed	Glycerol-3-phosphate transporter (G-3-P transporter) (Glycerol-3-phosphate permease) (G-3-P permease) (Solute carrier family 37 member 1)	SLC37A1 G3PP	Homo sapiens (Human)	533
HPV-31_E1	Q9H361	PABP3	0.000736806	6.21335e-11	1	0.685514	ME7.23	PABP3_HUMAN	reviewed	Polyadenylate-binding protein 3 (PABP-3) (Poly(A)-binding protein 3) (Testis-specific poly(A)-binding protein)	PABPC3 PABP3 PABPL3	Homo sapiens (Human)	631
HPV-31_E2	Q5VTM1	FAM25A	0.000722998	6.21335e-11	1	0.685514	ME9.9	NA	NA	NA	NA	NA	NA
HPV-31_E7	Q32P51	RA1L2	0.000662342	6.21335e-11	1	0.685514	ME6.23	RA1L2_HUMAN	reviewed	Heterogeneous nuclear ribonucleoprotein A1-like 2 (hnRNP A1-like 2) (hnRNP core protein A1-like 2)	HNRNPA1L2 HNRNPA1L	Homo sapiens (Human)	320
HPV-31_E6	O60220	TIM8A	0.000654738	6.21335e-11	1	0.685514	ME5.18	TIM8A_HUMAN	reviewed	Mitochondrial import inner membrane translocase subunit Tim8 A (Deafness dystonia protein 1) (X-linked deafness dystonia protein)	TIMM8A DDP DDP1 TIM8A	Homo sapiens (Human)	97
HPV-31_E1^E4	Q8N912	CN180	0.000636456	6.21335e-11	1	0.685514	ME5.17	CN180_HUMAN	reviewed	Transmembrane protein C14orf180	C14orf180 C14orf77	Homo sapiens (Human)	160
HPV-31_E1^E4	P53999	TCP4	0.000610829	6.21335e-11	1	0.685514	ME8.5	TCP4_HUMAN	reviewed	Activated RNA polymerase II transcriptional coactivator p15 (Positive cofactor 4) (PC4) (SUB1 homolog) (p14)	SUB1 PC4 RPO2TC1	Homo sapiens (Human)	127
HPV-31_E2	Q16740	CLPP	0.00057979	6.21335e-11	1	0.685513	ME5.20	CLPP_HUMAN	reviewed	Putative ATP-dependent Clp protease proteolytic subunit, mitochondrial (EC 3.4.21.92) (Endopeptidase Clp)	CLPP	Homo sapiens (Human)	277
HPV-31_E7	Q05639	EF1A2	0.000550707	6.21335e-11	1	0.685513	ME7.19	EF1A2_HUMAN	reviewed	Elongation factor 1-alpha 2 (EF-1-alpha-2) (Eukaryotic elongation factor 1 A-2) (eEF1A-2) (Statin-S1)	EEF1A2 EEF1AL STN	Homo sapiens (Human)	463
HPV-31_E2	P14920	OXDA	0.000535728	6.21335e-11	1	0.685513	ME8.9	OXDA_HUMAN	reviewed	D-amino-acid oxidase (DAAO) (DAMOX) (DAO) (EC 1.4.3.3)	DAO DAMOX	Homo sapiens (Human)	347
HPV-31_E5	P21796	VDAC1	0.000525756	6.21335e-11	1	0.685513	ME6.18	VDAC1_HUMAN	reviewed	Voltage-dependent anion-selective channel protein 1 (VDAC-1) (hVDAC1) (Outer mitochondrial membrane protein porin 1) (Plasmalemmal porin) (Porin 31HL) (Porin 31HM)	VDAC1 VDAC	Homo sapiens (Human)	283
HPV-31_E5	P48047	ATPO	0.000523131	6.21335e-11	1	0.685513	ME7.17	ATPO_HUMAN	reviewed	ATP synthase subunit O, mitochondrial (Oligomycin sensitivity conferral protein) (OSCP)	ATP5O ATPO	Homo sapiens (Human)	213
HPV-31_E5	Q13765	NACA	0.000520056	6.21335e-11	1	0.685513	ME8.6	NACA_HUMAN	reviewed	Nascent polypeptide-associated complex subunit alpha (NAC-alpha) (Alpha-NAC) (allergen Hom s 2)	NACA HSD48	Homo sapiens (Human)	215
HPV-31_E1	O75317	UBP12	0.000516278	6.21335e-11	1	0.685513	ME7.23	UBP12_HUMAN	reviewed	Ubiquitin carboxyl-terminal hydrolase 12 (EC 3.4.19.12) (Deubiquitinating enzyme 12) (Ubiquitin thioesterase 12) (Ubiquitin-hydrolyzing enzyme 1) (Ubiquitin-specific-processing protease 12)	USP12 UBH1 USP12L1	Homo sapiens (Human)	370
HPV-31_E5	P12273	PIP	0.000496372	6.21335e-11	1	0.685513	ME9.6	PIP_HUMAN	reviewed	Prolactin-inducible protein (Gross cystic disease fluid protein 15) (GCDFP-15) (Prolactin-induced protein) (Secretory actin-binding protein) (SABP) (gp17)	PIP GCDFP15 GPIP4	Homo sapiens (Human)	146
HPV-31_E6	O00233	PSMD9	0.000495461	6.21335e-11	1	0.685513	ME8.2	PSMD9_HUMAN	reviewed	26S proteasome non-ATPase regulatory subunit 9 (26S proteasome regulatory subunit p27)	PSMD9	Homo sapiens (Human)	223
HPV-31_E5	Q9UHD9	UBQL2	0.00049141	6.21335e-11	1	0.685513	ME6.18	UBQL2_HUMAN	reviewed	Ubiquilin-2 (Chap1) (DSK2 homolog) (Protein linking IAP with cytoskeleton 2) (PLIC-2) (hPLIC-2) (Ubiquitin-like product Chap1/Dsk2)	UBQLN2 N4BP4 PLIC2 HRIHFB2157	Homo sapiens (Human)	624
HPV-31_E6	Q15005	SPCS2	0.000488913	6.21335e-11	1	0.685513	ME8.2	SPCS2_HUMAN	reviewed	Signal peptidase complex subunit 2 (EC 3.4.-.-) (Microsomal signal peptidase 25 kDa subunit) (SPase 25 kDa subunit)	SPCS2 KIAA0102 SPC25	Homo sapiens (Human)	226
HPV-31_E2	Q9UHV9	PFD2	0.000468062	6.21335e-11	1	0.685513	ME7.21	PFD2_HUMAN	reviewed	Prefoldin subunit 2	PFDN2 PFD2 HSPC231	Homo sapiens (Human)	154
HPV-31_E6	Q13126	MTAP	0.000458085	6.21335e-11	1	0.685513	ME5.18	MTAP_HUMAN	reviewed	S-methyl-5'-thioadenosine phosphorylase (EC 2.4.2.28) (5'-methylthioadenosine phosphorylase) (MTA phosphorylase) (MTAP) (MTAPase)	MTAP MSAP	Homo sapiens (Human)	283
HPV-31_L2	Q96IX5	USMG5	0.0004561	6.21335e-11	1	0.685513	ME7.20	USMG5_HUMAN	reviewed	Up-regulated during skeletal muscle growth protein 5 (Diabetes-associated protein in insulin-sensitive tissues) (HCV F-transactivated protein 2)	USMG5 DAPIT HCVFTP2 PD04912	Homo sapiens (Human)	58
HPV-31_L1	Q9HBX8	LGR6	0.000429164	6.21335e-11	1	0.685513	ME5.23	LGR6_HUMAN	reviewed	Leucine-rich repeat-containing G-protein coupled receptor 6	LGR6 UNQ6427/PRO21331 VTS20631	Homo sapiens (Human)	967
HPV-31_E7	P56134	ATPK	0.000416138	6.21335e-11	1	0.685512	ME6.23	ATPK_HUMAN	reviewed	ATP synthase subunit f, mitochondrial	ATP5J2 ATP5JL	Homo sapiens (Human)	94
HPV-31_E5	Q7RTU5	ASCL5	0.000412928	6.21335e-11	1	0.685512	ME8.6	ASCL5_HUMAN	reviewed	Achaete-scute homolog 5 (ASH-5) (hASH5) (Class A basic helix-loop-helix protein 47) (bHLHa47)	ASCL5 BHLHA47	Homo sapiens (Human)	278
HPV-31_E5	Q13015	AF1Q	0.000404325	6.21335e-11	1	0.685512	ME7.17	AF1Q_HUMAN	reviewed	Protein AF1q	MLLT11 AF1Q	Homo sapiens (Human)	90
HPV-31_E5	Q99962	SH3G2	0.000404093	6.21335e-11	1	0.685512	ME6.18	SH3G2_HUMAN	reviewed	Endophilin-A1 (EEN-B1) (Endophilin-1) (SH3 domain protein 2A) (SH3 domain-containing GRB2-like protein 2)	SH3GL2 CNSA2 SH3D2A	Homo sapiens (Human)	352
HPV-31_E2	Q13867	BLMH	0.000402077	6.21335e-11	1	0.685512	ME8.9	BLMH_HUMAN	reviewed	Bleomycin hydrolase (BH) (BLM hydrolase) (BMH) (EC 3.4.22.40)	BLMH	Homo sapiens (Human)	455
HPV-31_E2	Q9NXG2	THUM1	0.000395951	6.21335e-11	1	0.685512	ME7.21	THUM1_HUMAN	reviewed	THUMP domain-containing protein 1	THUMPD1	Homo sapiens (Human)	353
HPV-31_E5	Q93045	STMN2	0.000393946	6.21335e-11	1	0.685512	ME9.6	STMN2_HUMAN	reviewed	Stathmin-2 (Superior cervical ganglion-10 protein) (Protein SCG10)	STMN2 SCG10 SCGN10	Homo sapiens (Human)	179
HPV-31_E6	Q00341	VIGLN	0.000389479	6.21335e-11	1	0.685512	ME7.18	VIGLN_HUMAN	reviewed	Vigilin (High density lipoprotein-binding protein) (HDL-binding protein)	HDLBP HBP VGL	Homo sapiens (Human)	1268
HPV-31_E1	P61024	CKS1	0.000384736	6.21335e-11	1	0.685512	ME7.23	CKS1_HUMAN	reviewed	Cyclin-dependent kinases regulatory subunit 1 (CKS-1)	CKS1B CKS1 PNAS-143 PNAS-16	Homo sapiens (Human)	79
HPV-31_E7	Q14549	GBX1	0.000379111	6.21335e-11	1	0.685512	ME8.8	GBX1_HUMAN	reviewed	Homeobox protein GBX-1 (Gastrulation and brain-specific homeobox protein 1)	GBX1	Homo sapiens (Human)	363
HPV-31_E1^E4	P61088	UBE2N	0.000370205	6.21335e-11	1	0.685512	ME9.3	UBE2N_HUMAN	reviewed	Ubiquitin-conjugating enzyme E2 N (EC 6.3.2.19) (Bendless-like ubiquitin-conjugating enzyme) (Ubc13) (UbcH13) (Ubiquitin carrier protein N) (Ubiquitin-protein ligase N)	UBE2N BLU	Homo sapiens (Human)	152
HPV-31_E7	Q8WVD3	RN138	0.000369468	6.21335e-11	1	0.685512	ME7.19	RN138_HUMAN	reviewed	E3 ubiquitin-protein ligase RNF138 (EC 6.3.2.-) (Nemo-like kinase-associated RING finger protein) (NLK-associated RING finger protein) (hNARF) (RING finger protein 138)	RNF138 NARF HSD-4 HSD4	Homo sapiens (Human)	245
HPV-31_E1^E4	P98179	RBM3	0.000367832	6.21335e-11	1	0.685512	ME9.3	RBM3_HUMAN	reviewed	Putative RNA-binding protein 3 (RNA-binding motif protein 3) (RNPL)	RBM3 RNPL	Homo sapiens (Human)	157
HPV-31_E7	Q8WW33	GTSF1	0.00036032	6.21335e-11	1	0.685512	ME7.19	GTSF1_HUMAN	reviewed	Gametocyte-specific factor 1 (Protein FAM112B)	GTSF1 FAM112B	Homo sapiens (Human)	167
HPV-31_E5	O75964	ATP5L	0.000357219	6.21335e-11	1	0.685512	ME7.17	ATP5L_HUMAN	reviewed	ATP synthase subunit g, mitochondrial (ATPase subunit g)	ATP5L	Homo sapiens (Human)	103
HPV-31_E1	Q5T9A4	ATD3B	0.000355545	6.21335e-11	1	0.685512	ME7.23	ATD3B_HUMAN	reviewed	ATPase family AAA domain-containing protein 3B (AAA-TOB3)	ATAD3B KIAA1273 TOB3	Homo sapiens (Human)	648
HPV-31_L2	P52434	RPAB3	0.00032056	6.21335e-11	1	0.685512	ME9.7	RPAB3_HUMAN	reviewed	DNA-directed RNA polymerases I, II, and III subunit RPABC3 (RNA polymerases I, II, and III subunit ABC3) (DNA-directed RNA polymerase II subunit H) (DNA-directed RNA polymerases I, II, and III 17.1 kDa polypeptide) (RPB17) (RPB8 homolog) (hRPB8)	POLR2H	Homo sapiens (Human)	150
HPV-31_L1	A0M8Q6	LAC7	0.000319404	6.21335e-11	1	0.685512	ME7.22	LAC7_HUMAN	reviewed	Ig lambda-7 chain C region	IGLC7	Homo sapiens (Human)	106
HPV-31_E7	P31350	RIR2	0.000318565	6.21335e-11	1	0.685512	ME8.8	RIR2_HUMAN	reviewed	Ribonucleoside-diphosphate reductase subunit M2 (EC 1.17.4.1) (Ribonucleotide reductase small chain) (Ribonucleotide reductase small subunit)	RRM2 RR2	Homo sapiens (Human)	389
HPV-31_E1	Q00526	CDK3	0.000315774	6.21335e-11	1	0.685512	ME7.23	CDK3_HUMAN	reviewed	Cyclin-dependent kinase 3 (EC 2.7.11.22) (Cell division protein kinase 3)	CDK3 CDKN3	Homo sapiens (Human)	305
HPV-31_L1	P01834	IGKC	0.000310278	6.21335e-11	1	0.685512	ME7.22	IGKC_HUMAN	reviewed	Ig kappa chain C region	IGKC	Homo sapiens (Human)	106
HPV-31_L2	Q9NQR7	CC177	0.000304067	6.21335e-11	1	0.685512	ME7.20	CC177_HUMAN	reviewed	Coiled-coil domain-containing protein 177 (Myelin proteolipid protein-like protein)	CCDC177 C14orf162 PLPL	Homo sapiens (Human)	707
HPV-31_E7	P43487	RANG	0.000298843	6.21335e-11	1	0.685512	ME7.19	RANG_HUMAN	reviewed	Ran-specific GTPase-activating protein (Ran-binding protein 1) (RanBP1)	RANBP1	Homo sapiens (Human)	201
HPV-31_E1^E4	Q7Z7K6	CENPV	0.00029194	6.21335e-11	1	0.685512	ME8.5	CENPV_HUMAN	reviewed	Centromere protein V (CENP-V) (Nuclear protein p30) (Proline-rich protein 6)	CENPV PRR6	Homo sapiens (Human)	275
HPV-31_E7	Q96P47	AGAP3	0.000291926	6.21335e-11	1	0.685512	ME7.19	AGAP3_HUMAN	reviewed	Arf-GAP with GTPase, ANK repeat and PH domain-containing protein 3 (AGAP-3) (CRAM-associated GTPase) (CRAG) (Centaurin-gamma-3) (Cnt-g3) (MR1-interacting protein) (MRIP-1)	AGAP3 CENTG3	Homo sapiens (Human)	875
HPV-31_L1	P01876	IGHA1	0.000285783	6.21335e-11	1	0.685512	ME7.22	IGHA1_HUMAN	reviewed	Ig alpha-1 chain C region	IGHA1	Homo sapiens (Human)	353
HPV-31_E1	P83110	HTRA3	0.000283399	6.21335e-11	1	0.685512	ME6.22	HTRA3_HUMAN	reviewed	Serine protease HTRA3 (EC 3.4.21.-) (High-temperature requirement factor A3) (Pregnancy-related serine protease)	HTRA3 PRSP	Homo sapiens (Human)	453
HPV-31_E5	P54727	RD23B	0.000281255	6.21335e-11	1	0.685512	ME8.6	RD23B_HUMAN	reviewed	UV excision repair protein RAD23 homolog B (HR23B) (hHR23B) (XP-C repair-complementing complex 58 kDa protein) (p58)	RAD23B	Homo sapiens (Human)	409
HPV-31_E8^E2C	Q8NEJ0	DUS18	0.000280871	6.21335e-11	1	0.685512	ME9.2	DUS18_HUMAN	reviewed	Dual specificity protein phosphatase 18 (EC 3.1.3.16) (EC 3.1.3.48) (Low molecular weight dual specificity phosphatase 20) (LMW-DSP20)	DUSP18 LMWDSP20	Homo sapiens (Human)	188
HPV-31_E2	Q04917	1433F	0.000276083	6.21335e-11	1	0.685512	ME7.21	1433F_HUMAN	reviewed	14-3-3 protein eta (Protein AS1)	YWHAH YWHA1	Homo sapiens (Human)	246
HPV-31_E2	P14373	TRI27	0.000266205	6.21335e-11	1	0.685512	ME7.21	TRI27_HUMAN	reviewed	Zinc finger protein RFP (EC 6.3.2.-) (RING finger protein 76) (Ret finger protein) (Tripartite motif-containing protein 27)	TRIM27 RFP RNF76	Homo sapiens (Human)	513
HPV-31_E6	P31946	1433B	0.000254192	6.21335e-11	1	0.685512	ME5.18	1433B_HUMAN	reviewed	14-3-3 protein beta/alpha (Protein 1054) (Protein kinase C inhibitor protein 1) (KCIP-1) [Cleaved into: 14-3-3 protein beta/alpha, N-terminally processed]	YWHAB	Homo sapiens (Human)	246
HPV-31_L2	Q9H936	GHC1	0.000253551	6.21335e-11	1	0.685512	ME7.20	GHC1_HUMAN	reviewed	Mitochondrial glutamate carrier 1 (GC-1) (Glutamate/H(+) symporter 1) (Solute carrier family 25 member 22)	SLC25A22 GC1	Homo sapiens (Human)	323
HPV-31_E6	P46926	GNPI1	0.000251341	6.21335e-11	1	0.685511	ME9.5	GNPI1_HUMAN	reviewed	Glucosamine-6-phosphate isomerase 1 (EC 3.5.99.6) (Glucosamine-6-phosphate deaminase 1) (GNPDA 1) (GlcN6P deaminase 1) (Oscillin)	GNPDA1 GNPI HLN KIAA0060	Homo sapiens (Human)	289
HPV-31_E1	Q6UXB8	PI16	0.0002509	6.21335e-11	1	0.685511	ME8.11	PI16_HUMAN	reviewed	Peptidase inhibitor 16 (PI-16) (Cysteine-rich secretory protein 9) (CRISP-9) (PSP94-binding protein)	PI16 CRISP9 PSPBP PSEC0164 UNQ289/PRO328	Homo sapiens (Human)	463
HPV-31_L1	P14678	RSMB	0.000247395	6.21335e-11	1	0.685511	ME8.10	RSMB_HUMAN	reviewed	Small nuclear ribonucleoprotein-associated proteins B and B' (snRNP-B) (Sm protein B/B') (Sm-B/B') (SmB/B')	SNRPB COD SNRPB1	Homo sapiens (Human)	240
HPV-31_E1	P17480	UBF1	0.00024733	6.21335e-11	1	0.685511	ME7.23	UBF1_HUMAN	reviewed	Nucleolar transcription factor 1 (Autoantigen NOR-90) (Upstream-binding factor 1) (UBF-1)	UBTF UBF UBF1	Homo sapiens (Human)	764
HPV-31_L1	Q15434	RBMS2	0.000244957	6.21335e-11	1	0.685511	ME7.22	RBMS2_HUMAN	reviewed	RNA-binding motif, single-stranded-interacting protein 2 (Suppressor of CDC2 with RNA-binding motif 3)	RBMS2 SCR3	Homo sapiens (Human)	407
HPV-31_E5	P63241	IF5A1	0.000240481	6.21335e-11	1	0.685511	ME7.17	IF5A1_HUMAN	reviewed	Eukaryotic translation initiation factor 5A-1 (eIF-5A-1) (eIF-5A1) (Eukaryotic initiation factor 5A isoform 1) (eIF-5A) (Rev-binding factor) (eIF-4D)	EIF5A	Homo sapiens (Human)	154
HPV-31_E7	Q9P2B7	K1430	0.000240104	6.21335e-11	1	0.685511	ME8.8	K1430_HUMAN	reviewed	UPF0501 protein KIAA1430	KIAA1430	Homo sapiens (Human)	532
HPV-31_L1	O60684	IMA7	0.000239114	6.21335e-11	1	0.685511	ME7.22	IMA7_HUMAN	reviewed	Importin subunit alpha-7 (Karyopherin subunit alpha-6)	KPNA6 IPOA7	Homo sapiens (Human)	536
HPV-31_E7	P36954	RPB9	0.000238848	6.21335e-11	1	0.685511	ME7.19	RPB9_HUMAN	reviewed	DNA-directed RNA polymerase II subunit RPB9 (RNA polymerase II subunit B9) (DNA-directed RNA polymerase II subunit I) (RNA polymerase II 14.5 kDa subunit) (RPB14.5)	POLR2I	Homo sapiens (Human)	125
HPV-31_E7	P18846	ATF1	0.000237947	6.21335e-11	1	0.685511	ME7.19	ATF1_HUMAN	reviewed	Cyclic AMP-dependent transcription factor ATF-1 (cAMP-dependent transcription factor ATF-1) (Activating transcription factor 1) (Protein TREB36)	ATF1	Homo sapiens (Human)	271
HPV-31_E7	O95433	AHSA1	0.000237451	6.21335e-11	1	0.685511	ME6.23	AHSA1_HUMAN	reviewed	Activator of 90 kDa heat shock protein ATPase homolog 1 (AHA1) (p38)	AHSA1 C14orf3 HSPC322	Homo sapiens (Human)	338
HPV-31_E1	P23219	PGH1	0.000233234	6.21335e-11	1	0.685511	ME5.21	PGH1_HUMAN	reviewed	Prostaglandin G/H synthase 1 (EC 1.14.99.1) (Cyclooxygenase-1) (COX-1) (Prostaglandin H2 synthase 1) (PGH synthase 1) (PGHS-1) (PHS 1) (Prostaglandin-endoperoxide synthase 1)	PTGS1 COX1	Homo sapiens (Human)	599
HPV-31_E7	Q8WXK3	ASB13	0.000230567	6.21335e-11	1	0.685511	ME9.8	ASB13_HUMAN	reviewed	Ankyrin repeat and SOCS box protein 13 (ASB-13)	ASB13	Homo sapiens (Human)	278
HPV-31_L2	Q5XKP0	QIL1	0.000224185	6.21335e-11	1	0.685511	ME7.20	QIL1_HUMAN	reviewed	Protein QIL1 (Protein P117)	QIL1 C19orf70	Homo sapiens (Human)	118
HPV-31_E7	P11310	ACADM	0.000223603	6.21335e-11	1	0.685511	ME7.19	ACADM_HUMAN	reviewed	Medium-chain specific acyl-CoA dehydrogenase, mitochondrial (MCAD) (EC 1.3.8.7)	ACADM	Homo sapiens (Human)	421
HPV-31_L1	Q86UY6	NAA40	0.000223357	6.21335e-11	1	0.685511	ME8.10	NAA40_HUMAN	reviewed	N-alpha-acetyltransferase 40 (EC 2.3.1.-) (N-acetyltransferase 11) (NatD catalytic subunit)	NAA40 NAT11	Homo sapiens (Human)	237
HPV-31_E5	Q9BQB6	VKOR1	0.000222991	6.21335e-11	1	0.685511	ME7.17	VKOR1_HUMAN	reviewed	Vitamin K epoxide reductase complex subunit 1 (EC 1.1.4.1) (Vitamin K1 2,3-epoxide reductase subunit 1)	VKORC1 VKOR MSTP134 MSTP576 UNQ308/PRO351	Homo sapiens (Human)	163
HPV-31_E5	Q7L5D6	GET4	0.000222318	6.21335e-11	1	0.685511	ME7.17	GET4_HUMAN	reviewed	Golgi to ER traffic protein 4 homolog (Conserved edge-expressed protein) (Transmembrane domain recognition complex 35 kDa subunit) (TRC35)	GET4 C7orf20 CEE TRC35 CGI-20	Homo sapiens (Human)	327
HPV-31_E6	P68036	UB2L3	0.000220671	6.21335e-11	1	0.685511	ME7.18	UB2L3_HUMAN	reviewed	Ubiquitin-conjugating enzyme E2 L3 (EC 6.3.2.19) (L-UBC) (UbcH7) (Ubiquitin carrier protein L3) (Ubiquitin-conjugating enzyme E2-F1) (Ubiquitin-protein ligase L3)	UBE2L3 UBCE7 UBCH7	Homo sapiens (Human)	154
HPV-31_E5	O75947	ATP5H	0.000219009	6.21335e-11	1	0.685511	ME7.17	ATP5H_HUMAN	reviewed	ATP synthase subunit d, mitochondrial (ATPase subunit d)	ATP5H My032	Homo sapiens (Human)	161
HPV-31_E2	Q08554	DSC1	0.000211223	6.21335e-11	1	0.685511	ME8.9	DSC1_HUMAN	reviewed	Desmocollin-1 (Cadherin family member 1) (Desmosomal glycoprotein 2/3) (DG2/DG3)	DSC1 CDHF1	Homo sapiens (Human)	894
HPV-31_E2	Q52LJ0	FA98B	0.000209104	6.21335e-11	1	0.685511	ME7.21	FA98B_HUMAN	reviewed	Protein FAM98B	FAM98B	Homo sapiens (Human)	330
HPV-31_E6	Q12904	AIMP1	0.000207753	6.21335e-11	1	0.685511	ME5.18	AIMP1_HUMAN	reviewed	Aminoacyl tRNA synthase complex-interacting multifunctional protein 1 (Multisynthase complex auxiliary component p43) [Cleaved into: Endothelial monocyte-activating polypeptide 2 (EMAP-2) (Endothelial monocyte-activating polypeptide II) (EMAP-II) (Small inducible cytokine subfamily E member 1)]	AIMP1 EMAP2 SCYE1	Homo sapiens (Human)	312
HPV-31_L2	Q9H7B7	CG069	0.000201937	6.21335e-11	1	0.685511	ME7.20	CG069_HUMAN	reviewed	Uncharacterized protein C7orf69	C7orf69	Homo sapiens (Human)	122
HPV-31_E2	Q96NL1	TMM74	0.000200435	6.21335e-11	1	0.685511	ME9.9	TMM74_HUMAN	reviewed	Transmembrane protein 74	TMEM74	Homo sapiens (Human)	305
HPV-31_L1	Q8TC26	TM163	0.000192899	6.21335e-11	1	0.685511	ME8.10	TM163_HUMAN	reviewed	Transmembrane protein 163	TMEM163	Homo sapiens (Human)	289
HPV-31_E5	Q9UNL2	SSRG	0.000192636	6.21335e-11	1	0.685511	ME7.17	SSRG_HUMAN	reviewed	Translocon-associated protein subunit gamma (TRAP-gamma) (Signal sequence receptor subunit gamma) (SSR-gamma)	SSR3 TRAPG	Homo sapiens (Human)	185
HPV-31_L1	Q15024	EXOS7	0.000190897	6.21335e-11	1	0.685511	ME8.10	EXOS7_HUMAN	reviewed	Exosome complex component RRP42 (Exosome component 7) (Ribosomal RNA-processing protein 42) (p8)	EXOSC7 KIAA0116 RRP42	Homo sapiens (Human)	291
HPV-31_E2	O43150	ASAP2	0.000188956	6.21335e-11	1	0.685511	ME8.9	ASAP2_HUMAN	reviewed	Arf-GAP with SH3 domain, ANK repeat and PH domain-containing protein 2 (Development and differentiation-enhancing factor 2) (Paxillin-associated protein with ARF GAP activity 3) (PAG3) (Pyk2 C-terminus-associated protein) (PAP)	ASAP2 DDEF2 KIAA0400	Homo sapiens (Human)	1006
HPV-31_E7	Q8NFP7	NUD10	0.000187666	6.21335e-11	1	0.685511	ME7.19	NUD10_HUMAN	reviewed	Diphosphoinositol polyphosphate phosphohydrolase 3-alpha (DIPP-3-alpha) (DIPP3-alpha) (hDIPP3alpha) (EC 3.6.1.52) (Diadenosine 5',5'''-P1,P6-hexaphosphate hydrolase 3-alpha) (Diadenosine hexaphosphate hydrolase (AMP-forming)) (EC 3.6.1.60) (Nucleoside diphosphate-linked moiety X motif 10) (Nudix motif 10) (hAps2)	NUDT10 APS2 DIPP3A	Homo sapiens (Human)	164
HPV-31_E7	Q8WWY3	PRP31	0.000187666	6.21335e-11	1	0.685511	ME7.19	PRP31_HUMAN	reviewed	U4/U6 small nuclear ribonucleoprotein Prp31 (Pre-mRNA-processing factor 31) (Serologically defined breast cancer antigen NY-BR-99) (U4/U6 snRNP 61 kDa protein) (Protein 61K) (hPrp31)	PRPF31 PRP31	Homo sapiens (Human)	499
HPV-31_L1	O14813	PHX2A	0.000186987	6.21335e-11	1	0.685511	ME9.12	PHX2A_HUMAN	reviewed	Paired mesoderm homeobox protein 2A (ARIX1 homeodomain protein) (Aristaless homeobox protein homolog) (Paired-like homeobox 2A)	PHOX2A ARIX PMX2A	Homo sapiens (Human)	284
HPV-31_E7	Q14CB8	RHG19	0.000186925	6.21335e-11	1	0.685511	ME7.19	RHG19_HUMAN	reviewed	Rho GTPase-activating protein 19 (Rho-type GTPase-activating protein 19)	ARHGAP19	Homo sapiens (Human)	494
HPV-31_E6	P35613	BASI	0.000186677	6.21335e-11	1	0.685511	ME7.18	BASI_HUMAN	reviewed	Basigin (5F7) (Collagenase stimulatory factor) (Extracellular matrix metalloproteinase inducer) (EMMPRIN) (Leukocyte activation antigen M6) (OK blood group antigen) (Tumor cell-derived collagenase stimulatory factor) (TCSF) (CD antigen CD147)	BSG UNQ6505/PRO21383	Homo sapiens (Human)	385
HPV-31_E7	Q15329	E2F5	0.000184915	6.21335e-11	1	0.685511	ME7.19	E2F5_HUMAN	reviewed	Transcription factor E2F5 (E2F-5)	E2F5	Homo sapiens (Human)	346
HPV-31_E6	O60232	SSA27	0.000183326	6.21335e-11	1	0.685511	ME7.18	SSA27_HUMAN	reviewed	Sjoegren syndrome/scleroderma autoantigen 1 (Autoantigen p27)	SSSCA1	Homo sapiens (Human)	199
HPV-31_E6	Q9UNM6	PSD13	0.000183326	6.21335e-11	1	0.685511	ME7.18	PSD13_HUMAN	reviewed	26S proteasome non-ATPase regulatory subunit 13 (26S proteasome regulatory subunit RPN9) (26S proteasome regulatory subunit S11) (26S proteasome regulatory subunit p40.5)	PSMD13	Homo sapiens (Human)	376
HPV-31_E1	Q96BT7	ALKB8	0.000182985	6.21335e-11	1	0.685511	ME6.22	ALKB8_HUMAN	reviewed	Alkylated DNA repair protein alkB homolog 8 (EC 1.14.11.-) (Probable alpha-ketoglutarate-dependent dioxygenase ABH8) (S-adenosyl-L-methionine-dependent tRNA methyltransferase ABH8) (tRNA (carboxymethyluridine(34)-5-O)-methyltransferase ABH8) (EC 2.1.1.229)	ALKBH8 ABH8	Homo sapiens (Human)	664
HPV-31_E6	Q9Y312	AAR2	0.000181006	6.21335e-11	1	0.685511	ME7.18	AAR2_HUMAN	reviewed	Protein AAR2 homolog (AAR2 splicing factor homolog)	AAR2 C20orf4 CGI-23 PRO0225	Homo sapiens (Human)	384
HPV-31_E5	Q9BTV4	TMM43	0.000180804	6.21335e-11	1	0.685511	ME7.17	TMM43_HUMAN	reviewed	Transmembrane protein 43 (Protein LUMA)	TMEM43 UNQ2564/PRO6244	Homo sapiens (Human)	400
HPV-31_E7	Q00688	FKBP3	0.000180692	6.21335e-11	1	0.685511	ME6.23	FKBP3_HUMAN	reviewed	Peptidyl-prolyl cis-trans isomerase FKBP3 (PPIase FKBP3) (EC 5.2.1.8) (25 kDa FK506-binding protein) (25 kDa FKBP) (FKBP-25) (FK506-binding protein 3) (FKBP-3) (Immunophilin FKBP25) (Rapamycin-selective 25 kDa immunophilin) (Rotamase)	FKBP3 FKBP25	Homo sapiens (Human)	224
HPV-31_E6	P08134	RHOC	0.000178743	6.21335e-11	1	0.685511	ME7.18	RHOC_HUMAN	reviewed	Rho-related GTP-binding protein RhoC (Rho cDNA clone 9) (h9)	RHOC ARH9 ARHC	Homo sapiens (Human)	193
HPV-31_E1^E4	Q6UXB8	PI16	0.000176855	6.21335e-11	1	0.685511	ME8.5	PI16_HUMAN	reviewed	Peptidase inhibitor 16 (PI-16) (Cysteine-rich secretory protein 9) (CRISP-9) (PSP94-binding protein)	PI16 CRISP9 PSPBP PSEC0164 UNQ289/PRO328	Homo sapiens (Human)	463
HPV-31_E2	P51530	DNA2	0.000175311	6.21335e-11	1	0.685511	ME8.9	DNA2_HUMAN	reviewed	DNA replication ATP-dependent helicase/nuclease DNA2 (hDNA2) (DNA replication ATP-dependent helicase-like homolog) [Includes: DNA replication nuclease DNA2 (EC 3.1.-.-); DNA replication ATP-dependent helicase DNA2 (EC 3.6.4.12)]	DNA2 DNA2L KIAA0083	Homo sapiens (Human)	1060
HPV-31_E1	Q15669	RHOH	0.00017343	6.21335e-11	1	0.685511	ME7.23	RHOH_HUMAN	reviewed	Rho-related GTP-binding protein RhoH (GTP-binding protein TTF) (Translocation three four protein)	RHOH ARHH TTF	Homo sapiens (Human)	191
HPV-31_E5	Q86Y56	HEAT2	0.000172572	6.21335e-11	1	0.685511	ME6.18	HEAT2_HUMAN	reviewed	HEAT repeat-containing protein 2	HEATR2	Homo sapiens (Human)	855
HPV-31_L1	Q9Y3C1	NOP16	0.000169684	6.21335e-11	1	0.685511	ME7.22	NOP16_HUMAN	reviewed	Nucleolar protein 16 (HBV pre-S2 trans-regulated protein 3)	NOP16 CGI-117 HSPC111	Homo sapiens (Human)	178
HPV-31_E7	P82912	RT11	0.000168599	6.21335e-11	1	0.685511	ME7.19	RT11_HUMAN	reviewed	28S ribosomal protein S11, mitochondrial (MRP-S11) (S11mt) (Cervical cancer proto-oncogene 2 protein) (HCC-2)	MRPS11 RPMS11 HCC2	Homo sapiens (Human)	194
HPV-31_E2	Q2TBE0	C19L2	0.000168465	6.21335e-11	1	0.685511	ME5.20	C19L2_HUMAN	reviewed	CWF19-like protein 2	CWF19L2	Homo sapiens (Human)	894
HPV-31_E6	Q9Y5T5	UBP16	0.000168229	6.21335e-11	1	0.685511	ME7.18	UBP16_HUMAN	reviewed	Ubiquitin carboxyl-terminal hydrolase 16 (EC 3.4.19.12) (Deubiquitinating enzyme 16) (Ubiquitin thioesterase 16) (Ubiquitin-processing protease UBP-M) (Ubiquitin-specific-processing protease 16)	USP16 MSTP039	Homo sapiens (Human)	823
HPV-31_E7	Q99755	PI51A	0.000166228	6.21335e-11	1	0.685511	ME7.19	PI51A_HUMAN	reviewed	Phosphatidylinositol 4-phosphate 5-kinase type-1 alpha (PIP5K1-alpha) (PtdIns(4)P-5-kinase 1 alpha) (EC 2.7.1.68) (68 kDa type I phosphatidylinositol 4-phosphate 5-kinase alpha) (Phosphatidylinositol 4-phosphate 5-kinase type I alpha) (PIP5KIalpha)	PIP5K1A	Homo sapiens (Human)	562
HPV-31_E7	P17028	ZNF24	0.000164637	6.21335e-11	1	0.685511	ME7.19	ZNF24_HUMAN	reviewed	Zinc finger protein 24 (Retinoic acid suppression protein A) (RSG-A) (Zinc finger and SCAN domain-containing protein 3) (Zinc finger protein 191) (Zinc finger protein KOX17)	ZNF24 KOX17 ZNF191 ZSCAN3	Homo sapiens (Human)	368
HPV-31_L1	Q9NX58	LYAR	0.000164542	6.21335e-11	1	0.685511	ME7.22	LYAR_HUMAN	reviewed	Cell growth-regulating nucleolar protein	LYAR PNAS-5	Homo sapiens (Human)	379
HPV-31_E5	P00846	ATP6	0.000163527	6.21335e-11	1	0.685511	ME7.17	ATP6_HUMAN	reviewed	ATP synthase subunit a (F-ATPase protein 6)	MT-ATP6 ATP6 ATPASE6 MTATP6	Homo sapiens (Human)	226
HPV-31_E7	P08237	K6PF	0.000162935	6.21335e-11	1	0.685511	ME7.19	K6PF_HUMAN	reviewed	6-phosphofructokinase, muscle type (EC 2.7.1.11) (Phosphofructo-1-kinase isozyme A) (PFK-A) (Phosphofructokinase-M) (Phosphofructokinase 1) (Phosphohexokinase)	PFKM PFKX	Homo sapiens (Human)	780
HPV-31_E2	Q9UNS2	CSN3	0.000162477	6.21335e-11	1	0.685511	ME7.21	CSN3_HUMAN	reviewed	COP9 signalosome complex subunit 3 (SGN3) (Signalosome subunit 3) (JAB1-containing signalosome subunit 3)	COPS3 CSN3	Homo sapiens (Human)	423
HPV-31_L1	P29558	RBMS1	0.000161283	6.21335e-11	1	0.685511	ME7.22	RBMS1_HUMAN	reviewed	RNA-binding motif, single-stranded-interacting protein 1 (Single-stranded DNA-binding protein MSSP-1) (Suppressor of CDC2 with RNA-binding motif 2)	RBMS1 C2orf12 MSSP MSSP1 SCR2	Homo sapiens (Human)	406
HPV-31_E1	Q9P1Z2	CACO1	0.000160247	6.21335e-11	1	0.685511	ME8.11	CACO1_HUMAN	reviewed	Calcium-binding and coiled-coil domain-containing protein 1 (Calphoglin) (Coiled-coil coactivator protein) (Sarcoma antigen NY-SAR-3)	CALCOCO1 KIAA1536 PP13275 UNQ2436/PRO4996	Homo sapiens (Human)	691
HPV-31_E5	P39656	OST48	0.000159625	6.21335e-11	1	0.685511	ME7.17	OST48_HUMAN	reviewed	Dolichyl-diphosphooligosaccharide--protein glycosyltransferase 48 kDa subunit (DDOST 48 kDa subunit) (Oligosaccharyl transferase 48 kDa subunit) (EC 2.4.99.18)	DDOST KIAA0115 OST48 OK/SW-cl.45	Homo sapiens (Human)	456
HPV-31_E7	Q9BRX2	PELO	0.000159173	6.21335e-11	1	0.685511	ME9.8	PELO_HUMAN	reviewed	Protein pelota homolog (EC 3.1.-.-)	PELO CGI-17	Homo sapiens (Human)	385
HPV-31_E2	P19388	RPAB1	0.000158469	6.21335e-11	1	0.685511	ME7.21	RPAB1_HUMAN	reviewed	DNA-directed RNA polymerases I, II, and III subunit RPABC1 (RNA polymerases I, II, and III subunit ABC1) (DNA-directed RNA polymerase II 23 kDa polypeptide) (DNA-directed RNA polymerase II subunit E) (RPB5 homolog) (XAP4)	POLR2E	Homo sapiens (Human)	210
HPV-31_E7	P30044	PRDX5	0.00015764	6.21335e-11	1	0.685511	ME7.19	PRDX5_HUMAN	reviewed	Peroxiredoxin-5, mitochondrial (EC 1.11.1.15) (Alu corepressor 1) (Antioxidant enzyme B166) (AOEB166) (Liver tissue 2D-page spot 71B) (PLP) (Peroxiredoxin V) (Prx-V) (Peroxisomal antioxidant enzyme) (TPx type VI) (Thioredoxin peroxidase PMP20) (Thioredoxin reductase)	PRDX5 ACR1 SBBI10	Homo sapiens (Human)	214
HPV-31_E2	Q13895	BYST	0.000157061	6.21335e-11	1	0.685511	ME7.21	BYST_HUMAN	reviewed	Bystin	BYSL	Homo sapiens (Human)	437
HPV-31_L2	P25106	CXCR7	0.000156598	6.21335e-11	1	0.685511	ME6.21	CXCR7_HUMAN	reviewed	C-X-C chemokine receptor type 7 (CXC-R7) (CXCR-7) (Chemokine orphan receptor 1) (G-protein coupled receptor 159) (G-protein coupled receptor RDC1 homolog) (RDC-1)	CXCR7 CMKOR1 GPR159 RDC1	Homo sapiens (Human)	362
HPV-31_E5	P56975	NRG3	0.000155723	6.21335e-11	1	0.685511	ME8.6	NRG3_HUMAN	reviewed	Pro-neuregulin-3, membrane-bound isoform (Pro-NRG3) [Cleaved into: Neuregulin-3 (NRG-3)]	NRG3	Homo sapiens (Human)	720
HPV-31_E5	Q9NX63	CHCH3	0.000155247	6.21335e-11	1	0.685511	ME7.17	CHCH3_HUMAN	reviewed	Coiled-coil-helix-coiled-coil-helix domain-containing protein 3, mitochondrial	CHCHD3 MINOS3	Homo sapiens (Human)	227
HPV-31_E1^E4	Q16650	TBR1	0.000155095	6.21335e-11	1	0.685511	ME5.17	TBR1_HUMAN	reviewed	T-box brain protein 1 (T-brain-1) (TBR-1) (TES-56)	TBR1	Homo sapiens (Human)	682
HPV-31_E5	P54105	ICLN	0.000154595	6.21335e-11	1	0.685511	ME7.17	ICLN_HUMAN	reviewed	Methylosome subunit pICln (Chloride channel, nucleotide sensitive 1A) (Chloride conductance regulatory protein ICln) (I(Cln)) (Chloride ion current inducer protein) (ClCI) (Reticulocyte pICln)	CLNS1A CLCI ICLN	Homo sapiens (Human)	237
HPV-31_E7	P52943	CRIP2	0.000154549	6.21335e-11	1	0.685511	ME7.19	CRIP2_HUMAN	reviewed	Cysteine-rich protein 2 (CRP-2) (Protein ESP1)	CRIP2 CRP2	Homo sapiens (Human)	208
HPV-31_E5	Q9HCG7	GBA2	0.000154244	6.21335e-11	1	0.685511	ME6.18	GBA2_HUMAN	reviewed	Non-lysosomal glucosylceramidase (NLGase) (EC 3.2.1.45) (Beta-glucocerebrosidase 2) (Beta-glucosidase 2) (Glucosylceramidase 2)	GBA2 KIAA1605 AD035	Homo sapiens (Human)	927
HPV-31_E7	P40617	ARL4A	0.000153795	6.21335e-11	1	0.685511	ME7.19	ARL4A_HUMAN	reviewed	ADP-ribosylation factor-like protein 4A	ARL4A ARL4	Homo sapiens (Human)	200
HPV-31_E7	Q6YN16	HSDL2	0.000153048	6.21335e-11	1	0.685511	ME7.19	HSDL2_HUMAN	reviewed	Hydroxysteroid dehydrogenase-like protein 2 (EC 1.-.-.-)	HSDL2 C9orf99	Homo sapiens (Human)	418
HPV-31_E2	P61201	CSN2	0.000150698	6.21335e-11	1	0.685511	ME7.21	CSN2_HUMAN	reviewed	COP9 signalosome complex subunit 2 (SGN2) (Signalosome subunit 2) (Alien homolog) (JAB1-containing signalosome subunit 2) (Thyroid receptor-interacting protein 15) (TR-interacting protein 15) (TRIP-15)	COPS2 CSN2 TRIP15	Homo sapiens (Human)	443
HPV-31_E8^E2C	Q15165	PON2	0.00014985	6.21335e-11	1	0.685511	ME9.2	PON2_HUMAN	reviewed	Serum paraoxonase/arylesterase 2 (PON 2) (EC 3.1.1.2) (EC 3.1.1.81) (Aromatic esterase 2) (A-esterase 2) (Serum aryldialkylphosphatase 2)	PON2	Homo sapiens (Human)	354
HPV-31_L2	Q9NZL4	HPBP1	0.000147787	6.21335e-11	1	0.685511	ME7.20	HPBP1_HUMAN	reviewed	Hsp70-binding protein 1 (HspBP1) (Heat shock protein-binding protein 1) (Hsp70-binding protein 2) (HspBP2) (Hsp70-interacting protein 1) (Hsp70-interacting protein 2)	HSPBP1 HSPBP PP1845	Homo sapiens (Human)	362
HPV-31_E5	Q9UPY6	WASF3	0.000146588	6.21335e-11	1	0.685511	ME7.17	WASF3_HUMAN	reviewed	Wiskott-Aldrich syndrome protein family member 3 (WASP family protein member 3) (Protein WAVE-3) (Verprolin homology domain-containing protein 3)	WASF3 KIAA0900 SCAR3 WAVE3	Homo sapiens (Human)	502
HPV-31_E5	Q969M3	YIPF5	0.000144857	6.21335e-11	1	0.685511	ME7.17	YIPF5_HUMAN	reviewed	Protein YIPF5 (Five-pass transmembrane protein localizing in the Golgi apparatus and the endoplasmic reticulum 5) (Smooth muscle cell-associated protein 5) (SMAP-5) (YIP1 family member 5) (YPT-interacting protein 1 A)	YIPF5 FINGER5 YIP1A PP12723 SB140 UNQ3123/PRO10275	Homo sapiens (Human)	257
HPV-31_L2	A6NDJ8	RB43L	0.000144556	6.21335e-11	1	0.685511	ME7.20	RB43L_HUMAN	reviewed	Putative Rab-43-like protein ENSP00000330714		Homo sapiens (Human)	181
HPV-31_E7	Q7RTN6	STRAA	0.000143635	6.21335e-11	1	0.685511	ME7.19	STRAA_HUMAN	reviewed	STE20-related kinase adapter protein alpha (STRAD alpha) (STE20-related adapter protein) (Serologically defined breast cancer antigen NY-BR-96)	STRADA LYK5 STRAD	Homo sapiens (Human)	431
HPV-31_E5	Q9Y4B6	VPRBP	0.000143557	6.21335e-11	1	0.685511	ME8.6	VPRBP_HUMAN	reviewed	Protein VPRBP (DDB1- and CUL4-associated factor 1) (HIV-1 Vpr-binding protein) (VprBP) (Vpr-interacting protein)	VPRBP DCAF1 KIAA0800 RIP	Homo sapiens (Human)	1507
HPV-31_E8^E2C	Q6IN85	P4R3A	0.000142965	6.21335e-11	1	0.685511	ME8.4	P4R3A_HUMAN	reviewed	Serine/threonine-protein phosphatase 4 regulatory subunit 3A (SMEK homolog 1)	SMEK1 KIAA2010 PP4R3A PPP4R3A MSTP033	Homo sapiens (Human)	833
HPV-31_L2	P18085	ARF4	0.000142225	6.21335e-11	1	0.685511	ME7.20	ARF4_HUMAN	reviewed	ADP-ribosylation factor 4	ARF4 ARF2	Homo sapiens (Human)	180
HPV-31_E5	P24539	AT5F1	0.000140433	6.21335e-11	1	0.685511	ME7.17	AT5F1_HUMAN	reviewed	ATP synthase subunit b, mitochondrial (ATPase subunit b)	ATP5F1	Homo sapiens (Human)	256
HPV-31_E5	Q58FF6	H90B4	0.000139106	6.21335e-11	1	0.685511	ME7.17	H90B4_HUMAN	reviewed	Putative heat shock protein HSP 90-beta 4	HSP90AB4P	Homo sapiens (Human)	505
HPV-31_E7	P06753	TPM3	0.000138247	6.21335e-11	1	0.685511	ME6.23	TPM3_HUMAN	reviewed	Tropomyosin alpha-3 chain (Gamma-tropomyosin) (Tropomyosin-3) (Tropomyosin-5) (hTM5)	TPM3	Homo sapiens (Human)	284
HPV-31_E6	A2A3N6	PIPSL	0.000137924	6.21335e-11	1	0.685511	ME6.17	PIPSL_HUMAN	reviewed	Putative PIP5K1A and PSMD4-like protein (PIP5K1A-PSMD4)	PIPSL PSMD4P2	Homo sapiens (Human)	862
HPV-31_L1	Q9Y295	DRG1	0.000136683	6.21335e-11	1	0.685511	ME9.12	DRG1_HUMAN	reviewed	Developmentally-regulated GTP-binding protein 1 (DRG-1) (Neural precursor cell expressed developmentally down-regulated protein 3) (NEDD-3)	DRG1 NEDD3	Homo sapiens (Human)	367
HPV-31_E1	Q08945	SSRP1	0.00013625	6.21335e-11	1	0.685511	ME7.23	SSRP1_HUMAN	reviewed	FACT complex subunit SSRP1 (Chromatin-specific transcription elongation factor 80 kDa subunit) (Facilitates chromatin transcription complex 80 kDa subunit) (FACT 80 kDa subunit) (FACTp80) (Facilitates chromatin transcription complex subunit SSRP1) (Recombination signal sequence recognition protein 1) (Structure-specific recognition protein 1) (hSSRP1) (T160)	SSRP1 FACT80	Homo sapiens (Human)	709
HPV-31_E1^E4	P07199	CENPB	0.000134135	6.21335e-11	1	0.685511	ME8.5	CENPB_HUMAN	reviewed	Major centromere autoantigen B (Centromere protein B) (CENP-B)	CENPB	Homo sapiens (Human)	599
HPV-31_E5	Q9UMX0	UBQL1	0.000129555	6.21335e-11	1	0.685511	ME7.17	UBQL1_HUMAN	reviewed	Ubiquilin-1 (Protein linking IAP with cytoskeleton 1) (PLIC-1) (hPLIC-1)	UBQLN1 DA41 PLIC1	Homo sapiens (Human)	589
HPV-31_E7	P08047	SP1	0.000129037	6.21335e-11	1	0.685511	ME7.19	SP1_HUMAN	reviewed	Transcription factor Sp1	SP1 TSFP1	Homo sapiens (Human)	785
HPV-31_E1	Q6ZMY6	WDR88	0.000128755	6.21335e-11	1	0.685511	ME9.10	WDR88_HUMAN	reviewed	WD repeat-containing protein 88 (PQQ repeat and WD repeat-containing protein)	WDR88 PQWD	Homo sapiens (Human)	472
HPV-31_E2	P39880	CUX1	0.000128546	6.21335e-11	1	0.685511	ME8.9	CUX1_HUMAN	reviewed	Homeobox protein cut-like 1 (CCAAT displacement protein) (CDP) (Homeobox protein cux-1)	CUX1 CUTL1	Homo sapiens (Human)	1505
HPV-31_E7	Q07002	CDK18	0.000128162	6.21335e-11	1	0.685511	ME7.19	CDK18_HUMAN	reviewed	Cyclin-dependent kinase 18 (EC 2.7.11.22) (Cell division protein kinase 18) (PCTAIRE-motif protein kinase 3) (Serine/threonine-protein kinase PCTAIRE-3)	CDK18 PCTAIRE3 PCTK3	Homo sapiens (Human)	472
HPV-31_L2	O75150	BRE1B	0.000128044	6.21335e-11	1	0.685511	ME7.20	BRE1B_HUMAN	reviewed	E3 ubiquitin-protein ligase BRE1B (BRE1-B) (EC 6.3.2.-) (95 kDa retinoblastoma-associated protein) (RBP95) (RING finger protein 40)	RNF40 BRE1B KIAA0661	Homo sapiens (Human)	1001
HPV-31_L2	P63092	GNAS2	0.000127488	6.21335e-11	1	0.685511	ME7.20	GNAS2_HUMAN	reviewed	Guanine nucleotide-binding protein G(s) subunit alpha isoforms short (Adenylate cyclase-stimulating G alpha protein)	GNAS GNAS1 GSP	Homo sapiens (Human)	394
HPV-31_E2	Q07954	LRP1	0.000123265	6.21335e-11	1	0.685511	ME7.21	LRP1_HUMAN	reviewed	Prolow-density lipoprotein receptor-related protein 1 (LRP-1) (Alpha-2-macroglobulin receptor) (A2MR) (Apolipoprotein E receptor) (APOER) (CD antigen CD91) [Cleaved into: Low-density lipoprotein receptor-related protein 1 85 kDa subunit (LRP-85); Low-density lipoprotein receptor-related protein 1 515 kDa subunit (LRP-515); Low-density lipoprotein receptor-related protein 1 intracellular domain (L…	LRP1 A2MR APR	Homo sapiens (Human)	4544
HPV-31_E6	Q86SE5	RALYL	0.000122009	6.21335e-11	1	0.685511	ME7.18	RALYL_HUMAN	reviewed	RNA-binding Raly-like protein (hRALYL) (Heterogeneous nuclear ribonucleoprotein C-like 3) (hnRNP core protein C-like 3)	RALYL HNRPCL3	Homo sapiens (Human)	291
HPV-31_L2	Q9ULX6	AKP8L	0.000121907	6.21335e-11	1	0.685511	ME7.20	AKP8L_HUMAN	reviewed	A-kinase anchor protein 8-like (AKAP8-like protein) (Helicase A-binding protein 95) (HAP95) (Homologous to AKAP95 protein) (HA95) (Neighbor of A-kinase-anchoring protein 95) (Neighbor of AKAP95)	AKAP8L NAKAP NAKAP95 HRIHFB2018	Homo sapiens (Human)	646
HPV-31_E6	P49591	SYSC	0.000121384	6.21335e-11	1	0.685511	ME5.18	SYSC_HUMAN	reviewed	Serine--tRNA ligase, cytoplasmic (EC 6.1.1.11) (Seryl-tRNA synthetase) (SerRS) (Seryl-tRNA(Ser/Sec) synthetase)	SARS SERS	Homo sapiens (Human)	514
HPV-31_L2	Q15645	PCH2	0.000119972	6.21335e-11	1	0.685511	ME7.20	PCH2_HUMAN	reviewed	Pachytene checkpoint protein 2 homolog (Human papillomavirus type 16 E1 protein-binding protein) (16E1-BP) (HPV16 E1 protein-binding protein) (Thyroid hormone receptor interactor 13) (Thyroid receptor-interacting protein 13) (TR-interacting protein 13) (TRIP-13)	TRIP13 PCH2	Homo sapiens (Human)	432
HPV-31_E7	P54886	P5CS	0.000119274	6.21335e-11	1	0.685511	ME7.19	P5CS_HUMAN	reviewed	Delta-1-pyrroline-5-carboxylate synthase (P5CS) (Aldehyde dehydrogenase family 18 member A1) [Includes: Glutamate 5-kinase (GK) (EC 2.7.2.11) (Gamma-glutamyl kinase); Gamma-glutamyl phosphate reductase (GPR) (EC 1.2.1.41) (Glutamate-5-semialdehyde dehydrogenase) (Glutamyl-gamma-semialdehyde dehydrogenase)]	ALDH18A1 GSAS P5CS PYCS	Homo sapiens (Human)	795
HPV-31_E7	P31274	HXC9	0.000118973	6.21335e-11	1	0.685511	ME7.19	HXC9_HUMAN	reviewed	Homeobox protein Hox-C9 (Homeobox protein Hox-3B)	HOXC9 HOX3B	Homo sapiens (Human)	260
HPV-31_E5	P04844	RPN2	0.000118372	6.21335e-11	1	0.685511	ME9.6	RPN2_HUMAN	reviewed	Dolichyl-diphosphooligosaccharide--protein glycosyltransferase subunit 2 (EC 2.4.99.18) (Dolichyl-diphosphooligosaccharide--protein glycosyltransferase 63 kDa subunit) (RIBIIR) (Ribophorin II) (RPN-II) (Ribophorin-2)	RPN2	Homo sapiens (Human)	631
HPV-31_E7	P03971	MIS	0.000116569	6.21335e-11	1	0.685511	ME9.8	MIS_HUMAN	reviewed	Muellerian-inhibiting factor (Anti-Muellerian hormone) (AMH) (Muellerian-inhibiting substance) (MIS)	AMH MIF	Homo sapiens (Human)	560
HPV-31_E6	Q9NQV8	PRDM8	0.000114281	6.21335e-11	1	0.685511	ME9.5	PRDM8_HUMAN	reviewed	PR domain zinc finger protein 8 (PR domain-containing protein 8)	PRDM8 PFM5	Homo sapiens (Human)	689
HPV-31_L2	Q9NQ84	GPC5C	0.00011344	6.21335e-11	1	0.685511	ME9.7	GPC5C_HUMAN	reviewed	G-protein coupled receptor family C group 5 member C (Retinoic acid-induced gene 3 protein) (RAIG-3)	GPRC5C RAIG3 PSEC0087	Homo sapiens (Human)	441
HPV-31_E1	Q9H4L4	SENP3	0.000113273	6.21335e-11	1	0.685511	ME7.23	SENP3_HUMAN	reviewed	Sentrin-specific protease 3 (EC 3.4.22.68) (SUMO-1-specific protease 3) (Sentrin/SUMO-specific protease SENP3)	SENP3 SSP3 SUSP3	Homo sapiens (Human)	574
HPV-31_E1	Q9BYV6	TRI55	0.000112104	6.21335e-11	1	0.685511	ME9.10	TRI55_HUMAN	reviewed	Tripartite motif-containing protein 55 (Muscle-specific RING finger protein 2) (MuRF-2) (MuRF2) (RING finger protein 29)	TRIM55 MURF2 RNF29	Homo sapiens (Human)	548
HPV-31_E8^E2C	Q9NXG2	THUM1	0.000106674	6.21335e-11	1	0.685511	ME7.15	THUM1_HUMAN	reviewed	THUMP domain-containing protein 1	THUMPD1	Homo sapiens (Human)	353
HPV-31_E1^E4	Q9Y2X3	NOP58	0.000106066	6.21335e-11	1	0.685511	ME9.3	NOP58_HUMAN	reviewed	Nucleolar protein 58 (Nucleolar protein 5)	NOP58 NOL5 NOP5 HSPC120	Homo sapiens (Human)	529
HPV-31_L2	Q9GZP9	DERL2	0.000105815	6.21335e-11	1	0.685511	ME7.20	DERL2_HUMAN	reviewed	Derlin-2 (Degradation in endoplasmic reticulum protein 2) (DERtrin-2) (Der1-like protein 2) (F-LAN-1) (F-LANa)	DERL2 DER2 FLANA CGI-101 SBBI53	Homo sapiens (Human)	239
HPV-31_E7	Q9UL40	ZN346	0.000105445	6.21335e-11	1	0.685511	ME7.19	ZN346_HUMAN	reviewed	Zinc finger protein 346 (Just another zinc finger protein)	ZNF346 JAZ	Homo sapiens (Human)	294
HPV-31_L2	Q92769	HDAC2	0.000105184	6.21335e-11	1	0.685511	ME7.20	HDAC2_HUMAN	reviewed	Histone deacetylase 2 (HD2) (EC 3.5.1.98)	HDAC2	Homo sapiens (Human)	488
HPV-31_L1	P48431	SOX2	0.000104756	6.21335e-11	1	0.685511	ME7.22	SOX2_HUMAN	reviewed	Transcription factor SOX-2	SOX2	Homo sapiens (Human)	317
HPV-31_E7	Q9Y314	NOSIP	0.000104744	6.21335e-11	1	0.685511	ME7.19	NOSIP_HUMAN	reviewed	Nitric oxide synthase-interacting protein (eNOS-interacting protein)	NOSIP CGI-25	Homo sapiens (Human)	301
HPV-31_E5	Q9NRK6	ABCBA	0.000103555	6.21335e-11	1	0.685511	ME9.6	ABCBA_HUMAN	reviewed	ATP-binding cassette sub-family B member 10, mitochondrial (ATP-binding cassette transporter 10) (ABC transporter 10 protein) (Mitochondrial ATP-binding cassette 2) (M-ABC2)	ABCB10	Homo sapiens (Human)	738
HPV-31_E7	Q9H871	RMD5A	0.000103252	6.21335e-11	1	0.685511	ME6.23	RMD5A_HUMAN	reviewed	Protein RMD5 homolog A	RMND5A	Homo sapiens (Human)	391
HPV-31_E7	Q9NXW9	ALKB4	0.000102697	6.21335e-11	1	0.685511	ME7.19	ALKB4_HUMAN	reviewed	Alpha-ketoglutarate-dependent dioxygenase alkB homolog 4 (EC 1.14.11.-) (Alkylated DNA repair protein alkB homolog 4)	ALKBH4 ABH4	Homo sapiens (Human)	302
HPV-31_E6	P11177	ODPB	0.000100417	6.21335e-11	1	0.685511	ME7.18	ODPB_HUMAN	reviewed	Pyruvate dehydrogenase E1 component subunit beta, mitochondrial (PDHE1-B) (EC 1.2.4.1)	PDHB PHE1B	Homo sapiens (Human)	359
HPV-31_L2	Q9BZX2	UCK2	9.94504e-05	6.21335e-11	1	0.685511	ME7.20	UCK2_HUMAN	reviewed	Uridine-cytidine kinase 2 (UCK 2) (EC 2.7.1.48) (Cytidine monophosphokinase 2) (Testis-specific protein TSA903) (Uridine monophosphokinase 2)	UCK2 UMPK	Homo sapiens (Human)	261
HPV-31_E1^E4	Q5GH72	XKR7	9.89342e-05	6.21335e-11	1	0.685511	ME9.3	XKR7_HUMAN	reviewed	XK-related protein 7	XKR7 C20orf159 XRG7	Homo sapiens (Human)	579
HPV-31_L2	Q9Y4W6	AFG32	9.85856e-05	6.21335e-11	1	0.685511	ME7.20	AFG32_HUMAN	reviewed	AFG3-like protein 2 (EC 3.4.24.-) (Paraplegin-like protein)	AFG3L2	Homo sapiens (Human)	797
HPV-31_E7	A8K8V0	ZN785	9.83239e-05	6.21335e-11	1	0.685511	ME6.23	ZN785_HUMAN	reviewed	Zinc finger protein 785	ZNF785	Homo sapiens (Human)	405
HPV-31_L2	P12268	IMDH2	9.80016e-05	6.21335e-11	1	0.685511	ME9.7	IMDH2_HUMAN	reviewed	Inosine-5'-monophosphate dehydrogenase 2 (IMP dehydrogenase 2) (IMPD 2) (IMPDH 2) (EC 1.1.1.205) (IMPDH-II)	IMPDH2 IMPD2	Homo sapiens (Human)	514
HPV-31_L1	Q12899	TRI26	9.76445e-05	6.21335e-11	1	0.685511	ME8.10	TRI26_HUMAN	reviewed	Tripartite motif-containing protein 26 (Acid finger protein) (AFP) (RING finger protein 95) (Zinc finger protein 173)	TRIM26 RNF95 ZNF173	Homo sapiens (Human)	539
HPV-31_E5	Q7LGA3	HS2ST	9.68251e-05	6.21335e-11	1	0.685511	ME7.17	HS2ST_HUMAN	reviewed	Heparan sulfate 2-O-sulfotransferase 1 (2-O-sulfotransferase) (2OST) (EC 2.8.2.-)	HS2ST1 HS2ST KIAA0448	Homo sapiens (Human)	356
HPV-31_E7	Q53H12	AGK	9.62563e-05	6.21335e-11	1	0.685511	ME6.23	AGK_HUMAN	reviewed	Acylglycerol kinase, mitochondrial (hAGK) (EC 2.7.1.107) (EC 2.7.1.94) (Multiple substrate lipid kinase) (HsMuLK) (MuLK) (Multi-substrate lipid kinase)	AGK MULK	Homo sapiens (Human)	422
HPV-31_E2	P80370	DLK1	9.42364e-05	6.21335e-11	1	0.685511	ME7.21	DLK1_HUMAN	reviewed	Protein delta homolog 1 (DLK-1) (pG2) [Cleaved into: Fetal antigen 1 (FA1)]	DLK1 DLK	Homo sapiens (Human)	383
HPV-31_E7	Q15853	USF2	9.41133e-05	6.21335e-11	1	0.685511	ME7.19	USF2_HUMAN	reviewed	Upstream stimulatory factor 2 (Class B basic helix-loop-helix protein 12) (bHLHb12) (FOS-interacting protein) (FIP) (Major late transcription factor 2) (Upstream transcription factor 2)	USF2 BHLHB12	Homo sapiens (Human)	346
HPV-31_E7	Q8WU90	ZC3HF	9.34188e-05	6.21335e-11	1	0.685511	ME6.23	ZC3HF_HUMAN	reviewed	Zinc finger CCCH domain-containing protein 15 (DRG family-regulatory protein 1) (Likely ortholog of mouse immediate early response erythropoietin 4)	ZC3H15 DFRP1 LEREPO4 HSPC303 HT010 MSTP012 PP730	Homo sapiens (Human)	426
HPV-31_E1^E4	Q6VY07	PACS1	9.30985e-05	6.21335e-11	1	0.685511	ME6.16	PACS1_HUMAN	reviewed	Phosphofurin acidic cluster sorting protein 1 (PACS-1)	PACS1 KIAA1175	Homo sapiens (Human)	963
HPV-31_E7	Q9P273	TEN3	9.22207e-05	6.21335e-11	1	0.685511	ME7.19	TEN3_HUMAN	reviewed	Teneurin-3 (Ten-3) (Protein Odd Oz/ten-m homolog 3) (Tenascin-M3) (Ten-m3) (Teneurin transmembrane protein 3)	TENM3 KIAA1455 ODZ3 TNM3	Homo sapiens (Human)	2699
HPV-31_E7	P85037	FOXK1	9.20525e-05	6.21335e-11	1	0.685511	ME7.19	FOXK1_HUMAN	reviewed	Forkhead box protein K1 (Myocyte nuclear factor) (MNF)	FOXK1 MNF	Homo sapiens (Human)	733
HPV-31_E7	Q6NTE8	CE045	9.19183e-05	6.21335e-11	1	0.685511	ME7.19	CE045_HUMAN	reviewed	UPF0544 protein C5orf45	C5orf45	Homo sapiens (Human)	343
HPV-31_E7	Q8IUR7	ARMC8	9.19183e-05	6.21335e-11	1	0.685511	ME7.19	ARMC8_HUMAN	reviewed	Armadillo repeat-containing protein 8	ARMC8 S863-2	Homo sapiens (Human)	673
HPV-31_E1^E4	Q16543	CDC37	9.12797e-05	6.21335e-11	1	0.685511	ME7.16	CDC37_HUMAN	reviewed	Hsp90 co-chaperone Cdc37 (Hsp90 chaperone protein kinase-targeting subunit) (p50Cdc37)	CDC37 CDC37A	Homo sapiens (Human)	378
HPV-31_E8^E2C	Q5TGP6	CA129	9.07723e-05	6.21335e-11	1	0.685511	ME9.2	CA129_HUMAN	reviewed	Uncharacterized protein C1orf129	C1orf129	Homo sapiens (Human)	573
HPV-31_E2	P10644	KAP0	9.06119e-05	6.21335e-11	1	0.685511	ME7.21	KAP0_HUMAN	reviewed	cAMP-dependent protein kinase type I-alpha regulatory subunit (Tissue-specific extinguisher 1) (TSE1) [Cleaved into: cAMP-dependent protein kinase type I-alpha regulatory subunit, N-terminally processed]	PRKAR1A PKR1 PRKAR1 TSE1	Homo sapiens (Human)	381
HPV-31_L1	P35249	RFC4	9.04979e-05	6.21335e-11	1	0.685511	ME7.22	RFC4_HUMAN	reviewed	Replication factor C subunit 4 (Activator 1 37 kDa subunit) (A1 37 kDa subunit) (Activator 1 subunit 4) (Replication factor C 37 kDa subunit) (RF-C 37 kDa subunit) (RFC37)	RFC4	Homo sapiens (Human)	363
HPV-31_E2	Q96B23	CR025	8.99203e-05	6.21335e-11	1	0.685511	ME7.21	CR025_HUMAN	reviewed	Uncharacterized protein C18orf25	C18orf25	Homo sapiens (Human)	403
HPV-31_L1	Q6IS24	GLTL3	8.9706e-05	6.21335e-11	1	0.685511	ME8.10	GLTL3_HUMAN	reviewed	Putative polypeptide N-acetylgalactosaminyltransferase-like protein 3 (EC 2.4.1.41) (Polypeptide GalNAc transferase-like protein 3) (GalNAc-T-like protein 3) (pp-GaNTase-like protein 3) (Protein-UDP acetylgalactosaminyltransferase-like protein 3) (UDP-GalNAc:polypeptide N-acetylgalactosaminyltransferase-like protein 3) (Williams-Beuren syndrome chromosomal region 17 protein)	WBSCR17 GALNTL3	Homo sapiens (Human)	598
HPV-31_L2	Q6UXB4	CLC4G	8.9371e-05	6.21335e-11	1	0.685511	ME7.20	CLC4G_HUMAN	reviewed	C-type lectin domain family 4 member G	CLEC4G UNQ431/PRO792	Homo sapiens (Human)	293
HPV-31_E7	P46734	MP2K3	8.83136e-05	6.21335e-11	1	0.685511	ME7.19	MP2K3_HUMAN	reviewed	Dual specificity mitogen-activated protein kinase kinase 3 (MAP kinase kinase 3) (MAPKK 3) (EC 2.7.12.2) (MAPK/ERK kinase 3) (MEK 3) (Stress-activated protein kinase kinase 2) (SAPK kinase 2) (SAPKK-2) (SAPKK2)	MAP2K3 MEK3 MKK3 PRKMK3 SKK2	Homo sapiens (Human)	347
HPV-31_E6	Q96DV4	RM38	8.82682e-05	6.21335e-11	1	0.685511	ME7.18	RM38_HUMAN	reviewed	39S ribosomal protein L38, mitochondrial (L38mt) (MRP-L38)	MRPL38 HSPC262	Homo sapiens (Human)	380
HPV-31_E1^E4	Q9BY77	PDIP3	8.82225e-05	6.21335e-11	1	0.685511	ME7.16	PDIP3_HUMAN	reviewed	Polymerase delta-interacting protein 3 (46 kDa DNA polymerase delta interaction protein) (p46) (S6K1 Aly/REF-like target) (SKAR)	POLDIP3 KIAA1649 PDIP46	Homo sapiens (Human)	421
HPV-31_E7	O95232	LC7L3	8.82178e-05	6.21335e-11	1	0.685511	ME6.23	LC7L3_HUMAN	reviewed	Luc7-like protein 3 (Cisplatin resistance-associated-overexpressed protein) (Luc7A) (Okadaic acid-inducible phosphoprotein OA48-18) (cAMP regulatory element-associated protein 1) (CRE-associated protein 1) (CREAP-1)	LUC7L3 CREAP1 CROP O48	Homo sapiens (Human)	432
HPV-31_E5	Q9HDC9	APMAP	8.71885e-05	6.21335e-11	1	0.685511	ME7.17	APMAP_HUMAN	reviewed	Adipocyte plasma membrane-associated protein (Protein BSCv)	APMAP C20orf3 UNQ1869/PRO4305	Homo sapiens (Human)	416
HPV-31_E2	Q9NTK5	OLA1	8.7041e-05	6.21335e-11	1	0.685511	ME7.21	OLA1_HUMAN	reviewed	Obg-like ATPase 1 (EC 3.6.3.-) (DNA damage-regulated overexpressed in cancer 45) (DOC45) (GTP-binding protein 9)	OLA1 GTPBP9 PRO2455 PTD004	Homo sapiens (Human)	396
HPV-31_E2	Q96RY5	CRML	8.66144e-05	6.21335e-11	1	0.685511	ME7.21	CRML_HUMAN	reviewed	Protein cramped-like (Hematological and neurological expressed 1-like protein)	CRAMP1L C16orf34 HN1L KIAA1426	Homo sapiens (Human)	1269
HPV-31_L1	P01833	PIGR	8.60746e-05	6.21335e-11	1	0.685511	ME7.22	PIGR_HUMAN	reviewed	Polymeric immunoglobulin receptor (PIgR) (Poly-Ig receptor) (Hepatocellular carcinoma-associated protein TB6) [Cleaved into: Secretory component]	PIGR	Homo sapiens (Human)	764
HPV-31_E7	Q9NRM2	ZN277	8.60077e-05	6.21335e-11	1	0.685511	ME6.23	ZN277_HUMAN	reviewed	Zinc finger protein 277 (Nuclear receptor-interacting factor 4)	ZNF277 NRIF4 ZNF277P	Homo sapiens (Human)	450
HPV-31_E2	P51398	RT29	8.53591e-05	6.21335e-11	1	0.685511	ME7.21	RT29_HUMAN	reviewed	28S ribosomal protein S29, mitochondrial (MRP-S29) (S29mt) (Death-associated protein 3) (DAP-3) (Ionizing radiation resistance conferring protein)	DAP3 MRPS29	Homo sapiens (Human)	398
HPV-31_E7	Q02447	SP3	8.47526e-05	6.21335e-11	1	0.685511	ME7.19	SP3_HUMAN	reviewed	Transcription factor Sp3 (SPR-2)	SP3	Homo sapiens (Human)	781
HPV-31_E1^E4	Q9NVP1	DDX18	8.37691e-05	6.21335e-11	1	0.68551	ME9.3	DDX18_HUMAN	reviewed	ATP-dependent RNA helicase DDX18 (EC 3.6.4.13) (DEAD box protein 18) (Myc-regulated DEAD box protein) (MrDb)	DDX18	Homo sapiens (Human)	670
HPV-31_E7	Q6PJT7	ZC3HE	8.37396e-05	6.21335e-11	1	0.68551	ME7.19	ZC3HE_HUMAN	reviewed	Zinc finger CCCH domain-containing protein 14 (Mammalian suppressor of tau pathology-2) (MSUT-2) (Renal carcinoma antigen NY-REN-37)	ZC3H14	Homo sapiens (Human)	736
HPV-31_E1^E4	O43909	EXTL3	8.34115e-05	6.21335e-11	1	0.68551	ME8.5	EXTL3_HUMAN	reviewed	Exostosin-like 3 (EC 2.4.1.223) (EXT-related protein 1) (Glucuronyl-galactosyl-proteoglycan 4-alpha-N-acetylglucosaminyltransferase) (Hereditary multiple exostoses gene isolog) (Multiple exostosis-like protein 3) (Putative tumor suppressor protein EXTL3)	EXTL3 EXTL1L EXTR1 KIAA0519	Homo sapiens (Human)	919
HPV-31_E1^E4	Q13838	DX39B	8.28697e-05	6.21335e-11	1	0.68551	ME7.16	DX39B_HUMAN	reviewed	Spliceosome RNA helicase DDX39B (EC 3.6.4.13) (56 kDa U2AF65-associated protein) (ATP-dependent RNA helicase p47) (DEAD box protein UAP56) (HLA-B-associated transcript 1 protein)	DDX39B BAT1 UAP56	Homo sapiens (Human)	428
HPV-31_E6	Q14940	SL9A5	8.26634e-05	6.21335e-11	1	0.68551	ME9.5	SL9A5_HUMAN	reviewed	Sodium/hydrogen exchanger 5 (Na(+)/H(+) exchanger 5) (NHE-5) (Solute carrier family 9 member 5)	SLC9A5 NHE5	Homo sapiens (Human)	896
HPV-31_L1	Q9NQ29	LUC7L	8.20636e-05	6.21335e-11	1	0.68551	ME7.22	LUC7L_HUMAN	reviewed	Putative RNA-binding protein Luc7-like 1 (Putative SR protein LUC7B1) (SR+89)	LUC7L LUC7L1	Homo sapiens (Human)	371
HPV-31_E7	P15170	ERF3A	8.14184e-05	6.21335e-11	1	0.68551	ME6.23	ERF3A_HUMAN	reviewed	Eukaryotic peptide chain release factor GTP-binding subunit ERF3A (Eukaryotic peptide chain release factor subunit 3a) (eRF3a) (G1 to S phase transition protein 1 homolog)	GSPT1 ERF3A	Homo sapiens (Human)	499
HPV-31_E1	P21127	CD11B	7.9506e-05	6.21335e-11	1	0.68551	ME7.23	CD11B_HUMAN	reviewed	Cyclin-dependent kinase 11B (EC 2.7.11.22) (Cell division cycle 2-like protein kinase 1) (CLK-1) (Cell division protein kinase 11B) (Galactosyltransferase-associated protein kinase p58/GTA) (PITSLRE serine/threonine-protein kinase CDC2L1) (p58 CLK-1)	CDK11B CDC2L1 CDK11 PITSLREA PK58	Homo sapiens (Human)	795
HPV-31_E2	Q14684	RRP1B	7.9181e-05	6.21335e-11	1	0.68551	ME9.9	RRP1B_HUMAN	reviewed	Ribosomal RNA processing protein 1 homolog B (RRP1-like protein B)	RRP1B KIAA0179	Homo sapiens (Human)	758
HPV-31_E6	Q9BXU7	UBP26	7.87271e-05	6.21335e-11	1	0.68551	ME9.5	UBP26_HUMAN	reviewed	Ubiquitin carboxyl-terminal hydrolase 26 (EC 3.4.19.12) (Deubiquitinating enzyme 26) (Ubiquitin thioesterase 26) (Ubiquitin-specific-processing protease 26)	USP26	Homo sapiens (Human)	913
HPV-31_L1	P82933	RT09	7.83155e-05	6.21335e-11	1	0.68551	ME7.22	RT09_HUMAN	reviewed	28S ribosomal protein S9, mitochondrial (MRP-S9) (S9mt)	MRPS9 RPMS9	Homo sapiens (Human)	396
HPV-31_E7	Q96GM5	SMRD1	7.78785e-05	6.21335e-11	1	0.68551	ME6.23	SMRD1_HUMAN	reviewed	SWI/SNF-related matrix-associated actin-dependent regulator of chromatin subfamily D member 1 (60 kDa BRG-1/Brm-associated factor subunit A) (BRG1-associated factor 60A) (BAF60A) (SWI/SNF complex 60 kDa subunit)	SMARCD1 BAF60A	Homo sapiens (Human)	515
HPV-31_E7	Q02880	TOP2B	7.78247e-05	6.21335e-11	1	0.68551	ME8.8	TOP2B_HUMAN	reviewed	DNA topoisomerase 2-beta (EC 5.99.1.3) (DNA topoisomerase II, beta isozyme)	TOP2B	Homo sapiens (Human)	1626
HPV-31_E2	Q9Y265	RUVB1	7.74971e-05	6.21335e-11	1	0.68551	ME7.21	RUVB1_HUMAN	reviewed	RuvB-like 1 (EC 3.6.4.12) (49 kDa TATA box-binding protein-interacting protein) (49 kDa TBP-interacting protein) (54 kDa erythrocyte cytosolic protein) (ECP-54) (INO80 complex subunit H) (Nuclear matrix protein 238) (NMP 238) (Pontin 52) (TIP49a) (TIP60-associated protein 54-alpha) (TAP54-alpha)	RUVBL1 INO80H NMP238 TIP49 TIP49A	Homo sapiens (Human)	456
HPV-31_L2	Q14739	LBR	7.73938e-05	6.21335e-11	1	0.68551	ME9.7	LBR_HUMAN	reviewed	Lamin-B receptor (Integral nuclear envelope inner membrane protein) (LMN2R)	LBR	Homo sapiens (Human)	615
HPV-31_E6	Q9Y4C2	F115A	7.70444e-05	6.21335e-11	1	0.68551	ME7.18	F115A_HUMAN	reviewed	Protein FAM115A	FAM115A KIAA0738	Homo sapiens (Human)	921
HPV-31_E2	Q9H0S4	DDX47	7.68232e-05	6.21335e-11	1	0.68551	ME7.21	DDX47_HUMAN	reviewed	Probable ATP-dependent RNA helicase DDX47 (EC 3.6.4.13) (DEAD box protein 47)	DDX47	Homo sapiens (Human)	455
HPV-31_E7	Q9NYF0	DACT1	7.65741e-05	6.21335e-11	1	0.68551	ME9.8	DACT1_HUMAN	reviewed	Dapper homolog 1 (hDPR1) (Dapper antagonist of catenin 1) (Hepatocellular carcinoma novel gene 3 protein)	DACT1 DPR1 HNG3	Homo sapiens (Human)	836
HPV-31_L2	O75436	VP26A	7.62358e-05	6.21335e-11	1	0.68551	ME7.20	VP26A_HUMAN	reviewed	Vacuolar protein sorting-associated protein 26A (Vesicle protein sorting 26A) (hVPS26)	VPS26A VPS26	Homo sapiens (Human)	327
HPV-31_E6	P63151	2ABA	7.62231e-05	6.21335e-11	1	0.68551	ME7.18	2ABA_HUMAN	reviewed	Serine/threonine-protein phosphatase 2A 55 kDa regulatory subunit B alpha isoform (PP2A subunit B isoform B55-alpha) (PP2A subunit B isoform PR55-alpha) (PP2A subunit B isoform R2-alpha) (PP2A subunit B isoform alpha)	PPP2R2A	Homo sapiens (Human)	447
HPV-31_L2	O60299	PRIP1	7.62068e-05	6.21335e-11	1	0.68551	ME9.7	PRIP1_HUMAN	reviewed	ProSAP-interacting protein 1 (ProSAPiP1)	PROSAPIP1 KIAA0552	Homo sapiens (Human)	673
HPV-31_L1	Q9NQX3	GEPH	7.62005e-05	6.21335e-11	1	0.68551	ME8.10	GEPH_HUMAN	reviewed	Gephyrin [Includes: Molybdopterin adenylyltransferase (MPT adenylyltransferase) (EC 2.7.7.75) (Domain G); Molybdopterin molybdenumtransferase (MPT Mo-transferase) (EC 2.10.1.1) (Domain E)]	GPHN GPH KIAA1385	Homo sapiens (Human)	736
HPV-31_E5	O15069	NACAD	7.53086e-05	6.21335e-11	1	0.68551	ME8.6	NACAD_HUMAN	reviewed	NAC-alpha domain-containing protein 1	NACAD KIAA0363	Homo sapiens (Human)	1562
HPV-31_E7	P10589	COT1	7.52457e-05	6.21335e-11	1	0.68551	ME7.19	COT1_HUMAN	reviewed	COUP transcription factor 1 (COUP-TF1) (COUP transcription factor I) (COUP-TF I) (Nuclear receptor subfamily 2 group F member 1) (V-erbA-related protein 3) (EAR-3)	NR2F1 EAR3 ERBAL3 TFCOUP1	Homo sapiens (Human)	423
HPV-31_E5	Q15043	S39AE	7.47836e-05	6.21335e-11	1	0.68551	ME7.17	S39AE_HUMAN	reviewed	Zinc transporter ZIP14 (LIV-1 subfamily of ZIP zinc transporter 4) (LZT-Hs4) (Solute carrier family 39 member 14) (Zrt- and Irt-like protein 14) (ZIP-14)	SLC39A14 KIAA0062 ZIP14	Homo sapiens (Human)	492
HPV-31_L2	Q4G0F5	VP26B	7.45178e-05	6.21335e-11	1	0.68551	ME7.20	VP26B_HUMAN	reviewed	Vacuolar protein sorting-associated protein 26B (Vesicle protein sorting 26B)	VPS26B	Homo sapiens (Human)	336
HPV-31_E7	O00159	MYO1C	7.44986e-05	6.21335e-11	1	0.68551	ME6.23	MYO1C_HUMAN	reviewed	Unconventional myosin-Ic (Myosin I beta) (MMI-beta) (MMIb)	MYO1C	Homo sapiens (Human)	1063
HPV-31_L1	P28698	MZF1	7.40526e-05	6.21335e-11	1	0.68551	ME8.10	MZF1_HUMAN	reviewed	Myeloid zinc finger 1 (MZF-1) (Zinc finger and SCAN domain-containing protein 6) (Zinc finger protein 42)	MZF1 MZF ZNF42 ZSCAN6	Homo sapiens (Human)	734
HPV-31_E7	Q92738	US6NL	7.37496e-05	6.21335e-11	1	0.68551	ME7.19	US6NL_HUMAN	reviewed	USP6 N-terminal-like protein (Related to the N-terminus of tre) (RN-tre)	USP6NL KIAA0019	Homo sapiens (Human)	828
HPV-31_E7	Q8NBS9	TXND5	7.29814e-05	6.21335e-11	1	0.68551	ME7.19	TXND5_HUMAN	reviewed	Thioredoxin domain-containing protein 5 (Endoplasmic reticulum resident protein 46) (ER protein 46) (ERp46) (Thioredoxin-like protein p46)	TXNDC5 TLP46 UNQ364/PRO700	Homo sapiens (Human)	432
HPV-31_E1	Q9Y2E4	DIP2C	7.25863e-05	6.21335e-11	1	0.68551	ME8.11	DIP2C_HUMAN	reviewed	Disco-interacting protein 2 homolog C (DIP2 homolog C)	DIP2C KIAA0934	Homo sapiens (Human)	1556
HPV-31_E5	Q96QD8	S38A2	7.2286e-05	6.21335e-11	1	0.68551	ME7.17	S38A2_HUMAN	reviewed	Sodium-coupled neutral amino acid transporter 2 (Amino acid transporter A2) (Protein 40-9-1) (Solute carrier family 38 member 2) (System A amino acid transporter 2) (System A transporter 1) (System N amino acid transporter 2)	SLC38A2 ATA2 KIAA1382 SAT2 SNAT2	Homo sapiens (Human)	506
HPV-31_L2	Q9BWF3	RBM4	7.22782e-05	6.21335e-11	1	0.68551	ME7.20	RBM4_HUMAN	reviewed	RNA-binding protein 4 (Lark homolog) (hLark) (RNA-binding motif protein 4) (RNA-binding motif protein 4a)	RBM4 RBM4A	Homo sapiens (Human)	364
HPV-31_E8^E2C	Q6ZN90	PRAML	7.21259e-05	6.21335e-11	1	0.68551	ME7.15	PRAML_HUMAN	reviewed	Leucine-rich repeat-containing protein PRAME-like	PRAMEL	Homo sapiens (Human)	520
HPV-31_E8^E2C	Q9NVR2	INT10	7.18158e-05	6.21335e-11	1	0.68551	ME9.2	INT10_HUMAN	reviewed	Integrator complex subunit 10 (Int10)	INTS10 C8orf35	Homo sapiens (Human)	710
HPV-31_E5	P14868	SYDC	7.08932e-05	6.21335e-11	1	0.68551	ME7.17	SYDC_HUMAN	reviewed	Aspartate--tRNA ligase, cytoplasmic (EC 6.1.1.12) (Aspartyl-tRNA synthetase) (AspRS) (Cell proliferation-inducing gene 40 protein)	DARS PIG40	Homo sapiens (Human)	501
HPV-31_L1	Q00G26	PLIN5	7.06708e-05	6.21335e-11	1	0.68551	ME7.22	PLIN5_HUMAN	reviewed	Perilipin-5 (Lipid storage droplet protein 5)	PLIN5 LSDP5	Homo sapiens (Human)	463
HPV-31_E2	Q9UKZ1	CB029	7.05362e-05	6.21335e-11	1	0.68551	ME7.21	CB029_HUMAN	reviewed	UPF0760 protein C2orf29	C2orf29 C40	Homo sapiens (Human)	510
HPV-31_L2	Q9NXW2	DJB12	6.96153e-05	6.21335e-11	1	0.68551	ME7.20	DJB12_HUMAN	reviewed	DnaJ homolog subfamily B member 12	DNAJB12	Homo sapiens (Human)	375
HPV-31_E2	Q16401	PSMD5	6.92915e-05	6.21335e-11	1	0.68551	ME7.21	PSMD5_HUMAN	reviewed	26S proteasome non-ATPase regulatory subunit 5 (26S protease subunit S5 basic) (26S proteasome subunit S5B)	PSMD5 KIAA0072	Homo sapiens (Human)	504
HPV-31_E6	Q8TEX9	IPO4	6.895e-05	6.21335e-11	1	0.68551	ME9.5	IPO4_HUMAN	reviewed	Importin-4 (Imp4) (Importin-4b) (Imp4b) (Ran-binding protein 4) (RanBP4)	IPO4 IMP4B RANBP4	Homo sapiens (Human)	1081
HPV-31_E7	P11586	C1TC	6.83163e-05	6.21335e-11	1	0.68551	ME7.19	C1TC_HUMAN	reviewed	C-1-tetrahydrofolate synthase, cytoplasmic (C1-THF synthase) [Includes: Methylenetetrahydrofolate dehydrogenase (EC 1.5.1.5); Methenyltetrahydrofolate cyclohydrolase (EC 3.5.4.9); Formyltetrahydrofolate synthetase (EC 6.3.4.3)]	MTHFD1 MTHFC MTHFD	Homo sapiens (Human)	935
HPV-31_E6	Q9NWH9	SLTM	6.71967e-05	6.21335e-11	1	0.68551	ME7.18	SLTM_HUMAN	reviewed	SAFB-like transcription modulator (Modulator of estrogen-induced transcription)	SLTM MET	Homo sapiens (Human)	1034
HPV-31_E5	Q6DD88	ATLA3	6.68974e-05	6.21335e-11	1	0.68551	ME7.17	ATLA3_HUMAN	reviewed	Atlastin-3 (EC 3.6.5.-)	ATL3	Homo sapiens (Human)	541
HPV-31_L1	Q9HCB6	SPON1	6.671e-05	6.21335e-11	1	0.68551	ME8.10	SPON1_HUMAN	reviewed	Spondin-1 (F-spondin) (Vascular smooth muscle cell growth-promoting factor)	SPON1 KIAA0762 VSGP	Homo sapiens (Human)	807
HPV-31_E1^E4	Q15942	ZYX	6.62065e-05	6.21335e-11	1	0.68551	ME7.16	ZYX_HUMAN	reviewed	Zyxin (Zyxin-2)	ZYX	Homo sapiens (Human)	572
HPV-31_E7	O15198	SMAD9	6.60964e-05	6.21335e-11	1	0.68551	ME7.19	SMAD9_HUMAN	reviewed	Mothers against decapentaplegic homolog 9 (MAD homolog 9) (Mothers against DPP homolog 9) (Madh6) (SMAD family member 9) (SMAD 9) (Smad9)	SMAD9 MADH6 MADH9	Homo sapiens (Human)	467
HPV-31_E1^E4	Q96M91	CCD11	6.56174e-05	6.21335e-11	1	0.68551	ME7.16	CCD11_HUMAN	reviewed	Coiled-coil domain-containing protein 11	CCDC11	Homo sapiens (Human)	514
HPV-31_E2	Q9NUL7	DDX28	6.5321e-05	6.21335e-11	1	0.68551	ME7.21	DDX28_HUMAN	reviewed	Probable ATP-dependent RNA helicase DDX28 (EC 3.6.4.13) (Mitochondrial DEAD box protein 28)	DDX28 MDDX28	Homo sapiens (Human)	540
HPV-31_L1	Q5T764	IFT1B	6.52891e-05	6.21335e-11	1	0.68551	ME7.22	IFT1B_HUMAN	reviewed	Interferon-induced protein with tetratricopeptide repeats 1B (Interferon-induced protein with tetratricopeptide repeats 1-like protein)	IFIT1B IFIT1L	Homo sapiens (Human)	474
HPV-31_E1	O43824	GTPB6	6.47428e-05	6.21335e-11	1	0.68551	ME7.23	GTPB6_HUMAN	reviewed	Putative GTP-binding protein 6 (Pseudoautosomal GTP-binding protein-like)	GTPBP6 PGPL	Homo sapiens (Human)	516
HPV-31_E1	Q6VY07	PACS1	6.45803e-05	6.21335e-11	1	0.68551	ME9.10	PACS1_HUMAN	reviewed	Phosphofurin acidic cluster sorting protein 1 (PACS-1)	PACS1 KIAA1175	Homo sapiens (Human)	963
HPV-31_L2	Q9H5Q4	TFB2M	6.42083e-05	6.21335e-11	1	0.68551	ME7.20	TFB2M_HUMAN	reviewed	Dimethyladenosine transferase 2, mitochondrial (EC 2.1.1.-) (Hepatitis C virus NS5A-transactivated protein 5) (HCV NS5A-transactivated protein 5) (Mitochondrial 12S rRNA dimethylase 2) (Mitochondrial transcription factor B2) (h-mtTFB) (h-mtTFB2) (hTFB2M) (mtTFB2) (S-adenosylmethionine-6-N', N'-adenosyl(rRNA) dimethyltransferase 2)	TFB2M NS5ATP5	Homo sapiens (Human)	396
HPV-31_E8^E2C	Q9UQ84	EXO1	6.27443e-05	6.21335e-11	1	0.68551	ME9.2	EXO1_HUMAN	reviewed	Exonuclease 1 (hExo1) (EC 3.1.-.-) (Exonuclease I) (hExoI)	EXO1 EXOI HEX1	Homo sapiens (Human)	846
HPV-31_E1^E4	Q9UPP5	K1107	6.27017e-05	6.21335e-11	1	0.68551	ME6.16	K1107_HUMAN	reviewed	Uncharacterized protein KIAA1107	KIAA1107	Homo sapiens (Human)	1409
HPV-31_L1	Q9UI17	M2GD	6.26922e-05	6.21335e-11	1	0.68551	ME8.10	M2GD_HUMAN	reviewed	Dimethylglycine dehydrogenase, mitochondrial (EC 1.5.8.4) (ME2GLYDH)	DMGDH	Homo sapiens (Human)	866
HPV-31_E2	P19525	E2AK2	6.26572e-05	6.21335e-11	1	0.68551	ME7.21	E2AK2_HUMAN	reviewed	Interferon-induced, double-stranded RNA-activated protein kinase (EC 2.7.11.1) (Eukaryotic translation initiation factor 2-alpha kinase 2) (eIF-2A protein kinase 2) (Interferon-inducible RNA-dependent protein kinase) (P1/eIF-2A protein kinase) (Protein kinase RNA-activated) (PKR) (Tyrosine-protein kinase EIF2AK2) (EC 2.7.10.2) (p68 kinase)	EIF2AK2 PKR PRKR	Homo sapiens (Human)	551
HPV-31_E5	Q9NQC3	RTN4	6.23092e-05	6.21335e-11	1	0.68551	ME7.17	RTN4_HUMAN	reviewed	Reticulon-4 (Foocen) (Neurite outgrowth inhibitor) (Nogo protein) (Neuroendocrine-specific protein) (NSP) (Neuroendocrine-specific protein C homolog) (RTN-x) (Reticulon-5)	RTN4 KIAA0886 NOGO My043 SP1507	Homo sapiens (Human)	1192
HPV-31_L2	Q659C4	LAR1B	6.16901e-05	6.21335e-11	1	0.68551	ME6.21	LAR1B_HUMAN	reviewed	La-related protein 1B (La ribonucleoprotein domain family member 1B) (La ribonucleoprotein domain family member 2) (La-related protein 2)	LARP1B LARP2	Homo sapiens (Human)	914
HPV-31_E1	Q9Y5B9	SP16H	6.14166e-05	6.21335e-11	1	0.68551	ME7.23	SP16H_HUMAN	reviewed	FACT complex subunit SPT16 (Chromatin-specific transcription elongation factor 140 kDa subunit) (FACT 140 kDa subunit) (FACTp140) (Facilitates chromatin transcription complex subunit SPT16) (hSPT16)	SUPT16H FACT140 FACTP140	Homo sapiens (Human)	1047
HPV-31_E1	Q7Z5J4	RAI1	6.096e-05	6.21335e-11	1	0.68551	ME8.11	RAI1_HUMAN	reviewed	Retinoic acid-induced protein 1	RAI1 KIAA1820	Homo sapiens (Human)	1906
HPV-31_L2	Q5C9Z4	NOM1	6.04658e-05	6.21335e-11	1	0.68551	ME7.20	NOM1_HUMAN	reviewed	Nucleolar MIF4G domain-containing protein 1 (SGD1 homolog)	NOM1 C7orf3	Homo sapiens (Human)	860
HPV-31_E2	Q9BXS0	COPA1	6.00998e-05	6.21335e-11	1	0.68551	ME7.21	COPA1_HUMAN	reviewed	Collagen alpha-1(XXV) chain (Alzheimer disease amyloid-associated protein) (AMY) (CLAC-P) [Cleaved into: Collagen-like Alzheimer amyloid plaque component (CLAC)]	COL25A1	Homo sapiens (Human)	654
HPV-31_E6	O00267	SPT5H	5.89264e-05	6.21335e-11	1	0.68551	ME5.18	SPT5H_HUMAN	reviewed	Transcription elongation factor SPT5 (hSPT5) (DRB sensitivity-inducing factor 160 kDa subunit) (DSIF p160) (DRB sensitivity-inducing factor large subunit) (DSIF large subunit) (Tat-cotransactivator 1 protein) (Tat-CT1 protein)	SUPT5H SPT5 SPT5H	Homo sapiens (Human)	1087
HPV-31_L2	O14929	HAT1	5.87862e-05	6.21335e-11	1	0.68551	ME7.20	HAT1_HUMAN	reviewed	Histone acetyltransferase type B catalytic subunit (EC 2.3.1.48) (Histone acetyltransferase 1)	HAT1 KAT1	Homo sapiens (Human)	419
HPV-31_L1	Q8IY81	SPB1	5.73539e-05	6.21335e-11	1	0.68551	ME9.12	SPB1_HUMAN	reviewed	pre-rRNA processing protein FTSJ3 (EC 2.1.1.-) (2'-O-ribose RNA methyltransferase SPB1 homolog) (Protein ftsJ homolog 3) (Putative rRNA methyltransferase 3)	FTSJ3 SB92	Homo sapiens (Human)	847
HPV-31_E5	P58401	NRX2B	5.71329e-05	6.21335e-11	1	0.68551	ME7.17	NRX2B_HUMAN	reviewed	Neurexin-2-beta (Neurexin II-beta)	NRXN2	Homo sapiens (Human)	666
HPV-31_E2	P38606	VATA	5.69978e-05	6.21335e-11	1	0.68551	ME7.21	VATA_HUMAN	reviewed	V-type proton ATPase catalytic subunit A (V-ATPase subunit A) (EC 3.6.3.14) (V-ATPase 69 kDa subunit) (Vacuolar ATPase isoform VA68) (Vacuolar proton pump subunit alpha)	ATP6V1A ATP6A1 ATP6V1A1 VPP2	Homo sapiens (Human)	617
HPV-31_L1	Q96JP5	ZFP91	5.65612e-05	6.21335e-11	1	0.68551	ME7.22	ZFP91_HUMAN	reviewed	E3 ubiquitin-protein ligase ZFP91 (EC 6.3.2.-) (Zinc finger protein 757) (Zinc finger protein 91 homolog) (Zfp-91)	ZFP91 ZNF757 FKSG11	Homo sapiens (Human)	570
HPV-31_E7	Q9ULE0	WWC3	5.65524e-05	6.21335e-11	1	0.68551	ME7.19	WWC3_HUMAN	reviewed	Protein WWC3	WWC3 KIAA1280	Homo sapiens (Human)	1092
HPV-31_E1^E4	Q9NTW7	ZF64B	5.62149e-05	6.21335e-11	1	0.68551	ME7.16	ZF64B_HUMAN	reviewed	Zinc finger protein 64 homolog, isoforms 3 and 4 (Zfp-64) (Zinc finger protein 338)	ZFP64 ZNF338	Homo sapiens (Human)	645
HPV-31_E5	Q8WVM8	SCFD1	5.59173e-05	6.21335e-11	1	0.68551	ME7.17	SCFD1_HUMAN	reviewed	Sec1 family domain-containing protein 1 (SLY1 homolog) (Sly1p) (Syntaxin-binding protein 1-like 2)	SCFD1 C14orf163 KIAA0917 STXBP1L2 FKSG23	Homo sapiens (Human)	642
HPV-31_E1	Q8IVV2	LOXH1	5.58523e-05	6.21335e-11	1	0.68551	ME8.11	LOXH1_HUMAN	reviewed	Lipoxygenase homology domain-containing protein 1	LOXHD1	Homo sapiens (Human)	1947
HPV-31_E8^E2C	Q86XJ1	GA2L3	5.57577e-05	6.21335e-11	1	0.68551	ME7.15	GA2L3_HUMAN	reviewed	GAS2-like protein 3 (Growth arrest-specific protein 2-like 3)	GAS2L3	Homo sapiens (Human)	694
HPV-31_E5	Q68BL7	OLM2A	5.5412e-05	6.21335e-11	1	0.68551	ME7.17	OLM2A_HUMAN	reviewed	Olfactomedin-like protein 2A (Photomedin-1)	OLFML2A UNQ9394/PRO34319	Homo sapiens (Human)	652
HPV-31_E2	Q9C0C9	UBE2O	5.50446e-05	6.21335e-11	1	0.68551	ME7.21	UBE2O_HUMAN	reviewed	Ubiquitin-conjugating enzyme E2 O (EC 6.3.2.19) (Ubiquitin carrier protein O) (Ubiquitin-conjugating enzyme E2 of 230 kDa) (Ubiquitin-conjugating enzyme E2-230K) (Ubiquitin-protein ligase O)	UBE2O KIAA1734	Homo sapiens (Human)	1292
HPV-31_L1	Q5BKZ1	ZN326	5.46632e-05	6.21335e-11	1	0.68551	ME7.22	ZN326_HUMAN	reviewed	DBIRD complex subunit ZNF326 (Zinc finger protein 326) (Zinc finger protein interacting with mRNPs and DBC1)	ZNF326 ZIRD	Homo sapiens (Human)	582
HPV-31_E7	Q7Z3D6	CN159	5.22852e-05	6.21335e-11	1	0.68551	ME7.19	CN159_HUMAN	reviewed	UPF0317 protein C14orf159, mitochondrial	C14orf159 UNQ2439/PRO5000	Homo sapiens (Human)	616
HPV-31_L2	P43246	MSH2	5.2192e-05	6.21335e-11	1	0.68551	ME9.7	MSH2_HUMAN	reviewed	DNA mismatch repair protein Msh2 (hMSH2) (MutS protein homolog 2)	MSH2	Homo sapiens (Human)	934
HPV-31_L1	P36776	LONM	5.19622e-05	6.21335e-11	1	0.68551	ME9.12	LONM_HUMAN	reviewed	Lon protease homolog, mitochondrial (EC 3.4.21.-) (LONHs) (Lon protease-like protein) (LONP) (Mitochondrial ATP-dependent protease Lon) (Serine protease 15)	LONP1 PRSS15	Homo sapiens (Human)	959
HPV-31_E7	Q8IXK2	GLT12	5.18552e-05	6.21335e-11	1	0.68551	ME7.19	GLT12_HUMAN	reviewed	Polypeptide N-acetylgalactosaminyltransferase 12 (EC 2.4.1.41) (Polypeptide GalNAc transferase 12) (GalNAc-T12) (pp-GaNTase 12) (Protein-UDP acetylgalactosaminyltransferase 12) (UDP-GalNAc:polypeptide N-acetylgalactosaminyltransferase 12)	GALNT12	Homo sapiens (Human)	581
HPV-31_E7	Q96SZ6	CK5P1	5.1265e-05	6.21335e-11	1	0.68551	ME7.19	CK5P1_HUMAN	reviewed	CDK5 regulatory subunit-associated protein 1 (CDK5 activator-binding protein C42)	CDK5RAP1 C20orf34 CGI-05 HSPC167	Homo sapiens (Human)	601
HPV-31_L1	Q5HYK9	ZN667	5.11448e-05	6.21335e-11	1	0.68551	ME7.22	ZN667_HUMAN	reviewed	Zinc finger protein 667	ZNF667	Homo sapiens (Human)	610
HPV-31_L2	A5PL33	KRBA1	5.08565e-05	6.21335e-11	1	0.68551	ME9.7	KRBA1_HUMAN	reviewed	Protein KRBA1	KRBA1 KIAA1862	Homo sapiens (Human)	1030
HPV-31_E7	P52747	ZN143	5.03642e-05	6.21335e-11	1	0.68551	ME7.19	ZN143_HUMAN	reviewed	Zinc finger protein 143 (SPH-binding factor) (Selenocysteine tRNA gene transcription-activating factor) (hStaf)	ZNF143 SBF STAF	Homo sapiens (Human)	638
HPV-31_E2	Q96EY7	PTCD3	4.94939e-05	6.21335e-11	1	0.68551	ME7.21	PTCD3_HUMAN	reviewed	Pentatricopeptide repeat domain-containing protein 3, mitochondrial (Transformation-related gene 15 protein) (TRG-15)	PTCD3 TRG15	Homo sapiens (Human)	689
HPV-31_E8^E2C	Q32MH5	F214A	4.85049e-05	6.21335e-11	1	0.68551	ME9.2	F214A_HUMAN	reviewed	Protein FAM214A	FAM214A KIAA1370	Homo sapiens (Human)	1076
HPV-31_E2	Q96JG8	MAGD4	4.78196e-05	6.21335e-11	1	0.68551	ME7.21	MAGD4_HUMAN	reviewed	Melanoma-associated antigen D4 (MAGE-D4 antigen) (MAGE-E1 antigen)	MAGED4 KIAA1859 MAGED4A MAGEE1; MAGED4B	Homo sapiens (Human)	741
HPV-31_L1	O43823	AKAP8	4.7148e-05	6.21335e-11	1	0.68551	ME7.22	AKAP8_HUMAN	reviewed	A-kinase anchor protein 8 (AKAP-8) (A-kinase anchor protein 95 kDa) (AKAP 95)	AKAP8 AKAP95	Homo sapiens (Human)	692
HPV-31_L1	P15918	RAG1	4.64874e-05	6.21335e-11	1	0.68551	ME9.12	RAG1_HUMAN	reviewed	V(D)J recombination-activating protein 1 (RAG-1) (RING finger protein 74) [Includes: Endonuclease RAG1 (EC 3.1.-.-); E3 ubiquitin-protein ligase RAG1 (EC 6.3.2.-)]	RAG1 RNF74	Homo sapiens (Human)	1043
HPV-31_E2	Q14692	BMS1	4.58353e-05	6.21335e-11	1	0.68551	ME9.9	BMS1_HUMAN	reviewed	Ribosome biogenesis protein BMS1 homolog (Ribosome assembly protein BMS1 homolog)	BMS1 BMS1L KIAA0187	Homo sapiens (Human)	1282
HPV-31_E8^E2C	Q96GP6	SREC2	4.57173e-05	6.21335e-11	1	0.68551	ME7.15	SREC2_HUMAN	reviewed	Scavenger receptor class F member 2 (SRECRP-1) (Scavenger receptor expressed by endothelial cells 2 protein) (SREC-II)	SCARF2 SREC2 SREPCR	Homo sapiens (Human)	870
HPV-31_E7	O75691	UTP20	4.48017e-05	6.21335e-11	1	0.68551	ME8.8	UTP20_HUMAN	reviewed	Small subunit processome component 20 homolog (Down-regulated in metastasis protein) (Novel nucleolar protein 73) (NNP73) (Protein Key-1A6)	UTP20 DRIM	Homo sapiens (Human)	2785
HPV-31_L1	Q9H6S0	YTDC2	4.47517e-05	6.21335e-11	1	0.68551	ME7.22	YTDC2_HUMAN	reviewed	Probable ATP-dependent RNA helicase YTHDC2 (EC 3.6.4.13)	YTHDC2	Homo sapiens (Human)	1430
HPV-31_L2	Q96RU2	UBP28	4.46422e-05	6.21335e-11	1	0.68551	ME9.7	UBP28_HUMAN	reviewed	Ubiquitin carboxyl-terminal hydrolase 28 (EC 3.4.19.12) (Deubiquitinating enzyme 28) (Ubiquitin thioesterase 28) (Ubiquitin-specific-processing protease 28)	USP28 KIAA1515	Homo sapiens (Human)	1077
HPV-31_L1	Q9UHB7	AFF4	4.34364e-05	6.21335e-11	1	0.68551	ME9.12	AFF4_HUMAN	reviewed	AF4/FMR2 family member 4 (ALL1-fused gene from chromosome 5q31 protein) (Protein AF-5q31) (Major CDK9 elongation factor-associated protein)	AFF4 AF5Q31 MCEF HSPC092	Homo sapiens (Human)	1163
HPV-31_E7	Q9NR48	ASH1L	4.28615e-05	6.21335e-11	1	0.68551	ME8.8	ASH1L_HUMAN	reviewed	Histone-lysine N-methyltransferase ASH1L (EC 2.1.1.43) (ASH1-like protein) (huASH1) (Absent small and homeotic disks protein 1 homolog) (Lysine N-methyltransferase 2H)	ASH1L KIAA1420 KMT2H	Homo sapiens (Human)	2969
HPV-31_E7	Q8TDB6	DTX3L	4.15388e-05	6.21335e-11	1	0.68551	ME7.19	DTX3L_HUMAN	reviewed	E3 ubiquitin-protein ligase DTX3L (EC 6.3.2.-) (B-lymphoma- and BAL-associated protein) (Protein deltex-3-like) (Rhysin-2) (Rhysin2)	DTX3L BBAP	Homo sapiens (Human)	740
HPV-31_E7	Q9BXB4	OSB11	4.14842e-05	6.21335e-11	1	0.68551	ME7.19	OSB11_HUMAN	reviewed	Oxysterol-binding protein-related protein 11 (ORP-11) (OSBP-related protein 11)	OSBPL11 ORP11 OSBP12	Homo sapiens (Human)	747
HPV-31_E1	Q9UQR1	ZN148	4.14258e-05	6.21335e-11	1	0.68551	ME7.23	ZN148_HUMAN	reviewed	Zinc finger protein 148 (Transcription factor ZBP-89) (Zinc finger DNA-binding protein 89)	ZNF148 ZBP89	Homo sapiens (Human)	794
HPV-31_E7	P17858	K6PL	4.08393e-05	6.21335e-11	1	0.68551	ME7.19	K6PL_HUMAN	reviewed	6-phosphofructokinase, liver type (EC 2.7.1.11) (Phosphofructo-1-kinase isozyme B) (PFK-B) (Phosphofructokinase 1) (Phosphohexokinase)	PFKL	Homo sapiens (Human)	780
HPV-31_E5	O76024	WFS1	4.03881e-05	6.21335e-11	1	0.68551	ME7.17	WFS1_HUMAN	reviewed	Wolframin	WFS1	Homo sapiens (Human)	890
HPV-31_E6	Q8NEE8	TTC16	4.00321e-05	6.21335e-11	1	0.68551	ME7.18	TTC16_HUMAN	reviewed	Tetratricopeptide repeat protein 16 (TPR repeat protein 16)	TTC16	Homo sapiens (Human)	873
HPV-31_E7	P35580	MYH10	3.95941e-05	6.21335e-11	1	0.68551	ME6.23	MYH10_HUMAN	reviewed	Myosin-10 (Cellular myosin heavy chain, type B) (Myosin heavy chain 10) (Myosin heavy chain, non-muscle IIb) (Non-muscle myosin heavy chain B) (NMMHC-B) (Non-muscle myosin heavy chain IIb) (NMMHC II-b) (NMMHC-IIB)	MYH10	Homo sapiens (Human)	1976
HPV-31_E1	O15047	SET1A	3.95885e-05	6.21335e-11	1	0.68551	ME7.23	SET1A_HUMAN	reviewed	Histone-lysine N-methyltransferase SETD1A (EC 2.1.1.43) (Lysine N-methyltransferase 2F) (SET domain-containing protein 1A) (hSET1A) (Set1/Ash2 histone methyltransferase complex subunit SET1)	SETD1A KIAA0339 KMT2F SET1 SET1A	Homo sapiens (Human)	1707
HPV-31_E7	Q8IZA0	K319L	3.91986e-05	6.21335e-11	1	0.68551	ME6.23	K319L_HUMAN	reviewed	Dyslexia-associated protein KIAA0319-like protein	KIAA0319L KIAA1837 PP791	Homo sapiens (Human)	1049
HPV-31_E7	O75152	ZC11A	3.89234e-05	6.21335e-11	1	0.68551	ME7.19	ZC11A_HUMAN	reviewed	Zinc finger CCCH domain-containing protein 11A	ZC3H11A KIAA0663 ZC3HDC11A	Homo sapiens (Human)	810
HPV-31_E2	P35221	CTNA1	3.88764e-05	6.21335e-11	1	0.68551	ME7.21	CTNA1_HUMAN	reviewed	Catenin alpha-1 (Alpha E-catenin) (Cadherin-associated protein) (Renal carcinoma antigen NY-REN-13)	CTNNA1	Homo sapiens (Human)	906
HPV-31_E7	O75376	NCOR1	3.85114e-05	6.21335e-11	1	0.68551	ME7.19	NCOR1_HUMAN	reviewed	Nuclear receptor corepressor 1 (N-CoR) (N-CoR1)	NCOR1 KIAA1047	Homo sapiens (Human)	2440
HPV-31_E2	Q8IWX8	CHERP	3.75145e-05	6.21335e-11	1	0.68551	ME7.21	CHERP_HUMAN	reviewed	Calcium homeostasis endoplasmic reticulum protein (ERPROT 213-21) (SR-related CTD-associated factor 6)	CHERP DAN26 SCAF6	Homo sapiens (Human)	916
HPV-31_E1^E4	A6NE01	F186A	3.71536e-05	6.21335e-11	1	0.68551	ME6.16	F186A_HUMAN	reviewed	Protein FAM186A	FAM186A	Homo sapiens (Human)	2351
HPV-31_E5	Q8N766	EMC1	3.62141e-05	6.21335e-11	1	0.68551	ME7.17	EMC1_HUMAN	reviewed	ER membrane protein complex subunit 1	EMC1 KIAA0090 PSEC0263	Homo sapiens (Human)	993
HPV-31_L2	P40692	MLH1	3.44003e-05	6.21335e-11	1	0.68551	ME7.20	MLH1_HUMAN	reviewed	DNA mismatch repair protein Mlh1 (MutL protein homolog 1)	MLH1 COCA2	Homo sapiens (Human)	756
HPV-31_L2	Q96PV6	LENG8	3.38284e-05	6.21335e-11	1	0.68551	ME7.20	LENG8_HUMAN	reviewed	Leukocyte receptor cluster member 8	LENG8 KIAA1932	Homo sapiens (Human)	779
HPV-31_E2	O60566	BUB1B	3.25402e-05	6.21335e-11	1	0.68551	ME7.21	BUB1B_HUMAN	reviewed	Mitotic checkpoint serine/threonine-protein kinase BUB1 beta (EC 2.7.11.1) (MAD3/BUB1-related protein kinase) (hBUBR1) (Mitotic checkpoint kinase MAD3L) (Protein SSK1)	BUB1B BUBR1 MAD3L SSK1	Homo sapiens (Human)	1050
HPV-31_L2	Q14241	ELOA1	3.23792e-05	6.21335e-11	1	0.68551	ME7.20	ELOA1_HUMAN	reviewed	Transcription elongation factor B polypeptide 3 (Elongin 110 kDa subunit) (Elongin-A) (EloA) (RNA polymerase II transcription factor SIII subunit A1) (SIII p110)	TCEB3 MSTP059	Homo sapiens (Human)	798
HPV-31_E8^E2C	Q8IZC6	CORA1	3.15753e-05	6.21335e-11	1	0.68551	ME9.2	CORA1_HUMAN	reviewed	Collagen alpha-1(XXVII) chain	COL27A1 KIAA1870	Homo sapiens (Human)	1860
HPV-31_E8^E2C	Q9Y4F4	F179B	3.11716e-05	6.21335e-11	1	0.68551	ME9.2	F179B_HUMAN	reviewed	Protein FAM179B	FAM179B KIAA0423	Homo sapiens (Human)	1720
HPV-31_E1	Q63HK5	TSH3	3.1079e-05	6.21335e-11	1	0.68551	ME7.23	TSH3_HUMAN	reviewed	Teashirt homolog 3 (Zinc finger protein 537)	TSHZ3 KIAA1474 TSH3 ZNF537	Homo sapiens (Human)	1081
HPV-31_E5	Q9P2J5	SYLC	3.01093e-05	6.21335e-11	1	0.68551	ME7.17	SYLC_HUMAN	reviewed	Leucine--tRNA ligase, cytoplasmic (EC 6.1.1.4) (Leucyl-tRNA synthetase) (LeuRS)	LARS KIAA1352	Homo sapiens (Human)	1176
HPV-31_E8^E2C	Q9UPT8	ZC3H4	2.98686e-05	6.21335e-11	1	0.68551	ME7.15	ZC3H4_HUMAN	reviewed	Zinc finger CCCH domain-containing protein 4	ZC3H4 C19orf7 KIAA1064	Homo sapiens (Human)	1303
HPV-31_E5	Q86SQ4	GP126	2.96244e-05	6.21335e-11	1	0.68551	ME7.17	GP126_HUMAN	reviewed	G-protein coupled receptor 126 (Developmentally regulated G-protein-coupled receptor) (Vascular inducible G protein-coupled receptor)	GPR126 DREG VIGR	Homo sapiens (Human)	1221
HPV-31_E6	P30876	RPB2	2.93744e-05	6.21335e-11	1	0.68551	ME7.18	RPB2_HUMAN	reviewed	DNA-directed RNA polymerase II subunit RPB2 (EC 2.7.7.6) (DNA-directed RNA polymerase II 140 kDa polypeptide) (DNA-directed RNA polymerase II subunit B) (RNA polymerase II subunit 2) (RNA polymerase II subunit B2)	POLR2B	Homo sapiens (Human)	1174
HPV-31_L1	O95602	RPA1	2.84017e-05	6.21335e-11	1	0.68551	ME9.12	RPA1_HUMAN	reviewed	DNA-directed RNA polymerase I subunit RPA1 (RNA polymerase I subunit A1) (EC 2.7.7.6) (A190) (DNA-directed RNA polymerase I largest subunit) (DNA-directed RNA polymerase I subunit A) (RNA polymerase I 194 kDa subunit) (RPA194)	POLR1A	Homo sapiens (Human)	1720
HPV-31_E5	P41252	SYIC	2.80225e-05	6.21335e-11	1	0.68551	ME7.17	SYIC_HUMAN	reviewed	Isoleucine--tRNA ligase, cytoplasmic (EC 6.1.1.5) (Isoleucyl-tRNA synthetase) (IRS) (IleRS)	IARS	Homo sapiens (Human)	1262
HPV-31_E6	Q9UQE7	SMC3	2.77983e-05	6.21335e-11	1	0.68551	ME7.18	SMC3_HUMAN	reviewed	Structural maintenance of chromosomes protein 3 (SMC protein 3) (SMC-3) (Basement membrane-associated chondroitin proteoglycan) (Bamacan) (Chondroitin sulfate proteoglycan 6) (Chromosome-associated polypeptide) (hCAP)	SMC3 BAM BMH CSPG6 SMC3L1	Homo sapiens (Human)	1217
HPV-31_E2	Q99700	ATX2	2.77166e-05	6.21335e-11	1	0.68551	ME7.21	ATX2_HUMAN	reviewed	Ataxin-2 (Spinocerebellar ataxia type 2 protein) (Trinucleotide repeat-containing gene 13 protein)	ATXN2 ATX2 SCA2 TNRC13	Homo sapiens (Human)	1313
HPV-31_E1	Q8TAQ2	SMRC2	2.77086e-05	6.21335e-11	1	0.68551	ME7.23	SMRC2_HUMAN	reviewed	SWI/SNF complex subunit SMARCC2 (BRG1-associated factor 170) (BAF170) (SWI/SNF complex 170 kDa subunit) (SWI/SNF-related matrix-associated actin-dependent regulator of chromatin subfamily C member 2)	SMARCC2 BAF170	Homo sapiens (Human)	1214
HPV-31_E2	Q8IWT3	CUL9	2.76515e-05	6.21335e-11	1	0.68551	ME7.21	CUL9_HUMAN	reviewed	Cullin-9 (CUL-9) (UbcH7-associated protein 1) (p53-associated parkin-like cytoplasmic protein)	CUL9 H7AP1 KIAA0708 PARC	Homo sapiens (Human)	2517
HPV-31_E7	Q9HAU0	PKHA5	2.72262e-05	6.21335e-11	1	0.68551	ME7.19	PKHA5_HUMAN	reviewed	Pleckstrin homology domain-containing family A member 5 (PH domain-containing family A member 5) (Phosphoinositol 3-phosphate-binding protein 2) (PEPP-2)	PLEKHA5 KIAA1686 PEPP2	Homo sapiens (Human)	1116
HPV-31_L2	P20648	ATP4A	2.55099e-05	6.21335e-11	1	0.68551	ME7.20	ATP4A_HUMAN	reviewed	Potassium-transporting ATPase alpha chain 1 (EC 3.6.3.10) (Gastric H(+)/K(+) ATPase subunit alpha) (Proton pump)	ATP4A	Homo sapiens (Human)	1035
HPV-31_E2	Q92628	K0232	2.51163e-05	6.21335e-11	1	0.68551	ME7.21	K0232_HUMAN	reviewed	Uncharacterized protein KIAA0232	KIAA0232	Homo sapiens (Human)	1395
HPV-31_L2	O15027	SC16A	2.49329e-05	6.21335e-11	1	0.68551	ME7.20	SC16A_HUMAN	reviewed	Protein transport protein Sec16A (SEC16 homolog A)	SEC16A KIAA0310 SEC16 SEC16L	Homo sapiens (Human)	2179
HPV-31_E7	Q9UBS9	SUCO	2.4884e-05	6.21335e-11	1	0.68551	ME7.19	SUCO_HUMAN	reviewed	SUN domain-containing ossification factor (Membrane protein CH1) (Protein osteopotentia homolog) (SUN-like protein 1)	SUCO C1orf9 CH1 OPT SLP1	Homo sapiens (Human)	1254
HPV-31_E1	Q8IY17	PLPL6	2.45576e-05	6.21335e-11	1	0.68551	ME7.23	PLPL6_HUMAN	reviewed	Neuropathy target esterase (EC 3.1.1.5) (Patatin-like phospholipase domain-containing protein 6)	PNPLA6 NTE	Homo sapiens (Human)	1366
HPV-31_L1	Q9BYK8	HELZ2	2.4331e-05	6.21335e-11	1	0.68551	ME7.22	HELZ2_HUMAN	reviewed	Helicase with zinc finger domain 2 (ATP-dependent helicase PRIC285) (Helicase with zinc finger 2, transcriptional coactivator) (PPAR-alpha-interacting complex protein 285) (PPAR-gamma DNA-binding domain-interacting protein 1) (PDIP1) (PPAR-gamma DBD-interacting protein 1) (Peroxisomal proliferator-activated receptor A-interacting complex 285 kDa protein) (EC 3.6.4.-)	HELZ2 KIAA1769 PRIC285	Homo sapiens (Human)	2649
HPV-31_E2	Q5JU85	IQEC2	2.40399e-05	6.21335e-11	1	0.68551	ME7.21	IQEC2_HUMAN	reviewed	IQ motif and SEC7 domain-containing protein 2	IQSEC2 KIAA0522	Homo sapiens (Human)	1478
HPV-31_E7	Q9C0J8	WDR33	2.37767e-05	6.21335e-11	1	0.68551	ME7.19	WDR33_HUMAN	reviewed	pre-mRNA 3' end processing protein WDR33 (WD repeat-containing protein 33) (WD repeat-containing protein WDC146)	WDR33 WDC146	Homo sapiens (Human)	1336
HPV-31_E8^E2C	Q13796	SHRM2	2.3757e-05	6.21335e-11	1	0.68551	ME7.15	SHRM2_HUMAN	reviewed	Protein Shroom2 (Apical-like protein) (Protein APXL)	SHROOM2 APXL	Homo sapiens (Human)	1616
HPV-31_L2	O00410	IPO5	2.35564e-05	6.21335e-11	1	0.68551	ME7.20	IPO5_HUMAN	reviewed	Importin-5 (Imp5) (Importin subunit beta-3) (Karyopherin beta-3) (Ran-binding protein 5) (RanBP5)	IPO5 KPNB3 RANBP5	Homo sapiens (Human)	1097
HPV-31_E2	O43149	ZZEF1	2.34886e-05	6.21335e-11	1	0.68551	ME7.21	ZZEF1_HUMAN	reviewed	Zinc finger ZZ-type and EF-hand domain-containing protein 1	ZZEF1 KIAA0399	Homo sapiens (Human)	2961
HPV-31_E1	Q6V0I7	FAT4	2.28368e-05	6.21335e-11	1	0.68551	ME8.11	FAT4_HUMAN	reviewed	Protocadherin Fat 4 (hFat4) (Cadherin family member 14) (FAT tumor suppressor homolog 4) (Fat-like cadherin protein FAT-J)	FAT4 CDHF14 FATJ Nbla00548	Homo sapiens (Human)	4981
HPV-31_L2	P35251	RFC1	2.27071e-05	6.21335e-11	1	0.68551	ME7.20	RFC1_HUMAN	reviewed	Replication factor C subunit 1 (Activator 1 140 kDa subunit) (A1 140 kDa subunit) (Activator 1 large subunit) (Activator 1 subunit 1) (DNA-binding protein PO-GA) (Replication factor C 140 kDa subunit) (RF-C 140 kDa subunit) (RFC140) (Replication factor C large subunit)	RFC1 RFC140	Homo sapiens (Human)	1148
HPV-31_E2	Q5VZL5	ZMYM4	2.25087e-05	6.21335e-11	1	0.68551	ME7.21	ZMYM4_HUMAN	reviewed	Zinc finger MYM-type protein 4 (Zinc finger protein 262)	ZMYM4 KIAA0425 ZNF262	Homo sapiens (Human)	1548
HPV-31_L1	Q9ULD9	ZN608	2.21026e-05	6.21335e-11	1	0.68551	ME7.22	ZN608_HUMAN	reviewed	Zinc finger protein 608 (Renal carcinoma antigen NY-REN-36)	ZNF608 KIAA1281	Homo sapiens (Human)	1512
HPV-31_E2	Q9NR09	BIRC6	2.1995e-05	6.21335e-11	1	0.68551	ME7.21	BIRC6_HUMAN	reviewed	Baculoviral IAP repeat-containing protein 6 (EC 6.3.2.-) (BIR repeat-containing ubiquitin-conjugating enzyme) (BRUCE) (Ubiquitin-conjugating BIR domain enzyme apollon) (APOLLON)	BIRC6 KIAA1289	Homo sapiens (Human)	4857
HPV-31_E5	Q15413	RYR3	2.19713e-05	6.21335e-11	1	0.68551	ME8.6	RYR3_HUMAN	reviewed	Ryanodine receptor 3 (RYR-3) (RyR3) (Brain ryanodine receptor-calcium release channel) (Brain-type ryanodine receptor) (Type 3 ryanodine receptor)	RYR3 HBRR	Homo sapiens (Human)	4870
HPV-31_E1^E4	Q02952	AKA12	2.11937e-05	6.21335e-11	1	0.68551	ME7.16	AKA12_HUMAN	reviewed	A-kinase anchor protein 12 (AKAP-12) (A-kinase anchor protein 250 kDa) (AKAP 250) (Gravin) (Myasthenia gravis autoantigen)	AKAP12 AKAP250	Homo sapiens (Human)	1782
HPV-31_L2	Q15911	ZFHX3	2.09383e-05	6.21335e-11	1	0.68551	ME8.7	ZFHX3_HUMAN	reviewed	Zinc finger homeobox protein 3 (AT motif-binding factor) (AT-binding transcription factor 1) (Alpha-fetoprotein enhancer-binding protein) (Zinc finger homeodomain protein 3) (ZFH-3)	ZFHX3 ATBF1	Homo sapiens (Human)	3703
HPV-31_E2	P01024	CO3	2.07752e-05	6.21335e-11	1	0.68551	ME7.21	CO3_HUMAN	reviewed	Complement C3 (C3 and PZP-like alpha-2-macroglobulin domain-containing protein 1) [Cleaved into: Complement C3 beta chain; Complement C3 alpha chain; C3a anaphylatoxin; Acylation stimulating protein (ASP) (C3adesArg); Complement C3b alpha' chain; Complement C3c alpha' chain fragment 1; Complement C3dg fragment; Complement C3g fragment; Complement C3d fragment; Complement C3f fragment; Complement …	C3 CPAMD1	Homo sapiens (Human)	1663
HPV-31_E6	Q9Y6D5	BIG2	1.94709e-05	6.21335e-11	1	0.68551	ME7.18	BIG2_HUMAN	reviewed	Brefeldin A-inhibited guanine nucleotide-exchange protein 2 (Brefeldin A-inhibited GEP 2) (ADP-ribosylation factor guanine nucleotide-exchange factor 2)	ARFGEF2 ARFGEP2 BIG2	Homo sapiens (Human)	1785
HPV-31_L1	O14646	CHD1	1.82211e-05	6.21335e-11	1	0.68551	ME7.22	CHD1_HUMAN	reviewed	Chromodomain-helicase-DNA-binding protein 1 (CHD-1) (EC 3.6.4.12) (ATP-dependent helicase CHD1)	CHD1	Homo sapiens (Human)	1710
HPV-31_E2	Q92793	CBP	1.46512e-05	6.21335e-11	1	0.68551	ME7.21	CBP_HUMAN	reviewed	CREB-binding protein (EC 2.3.1.48)	CREBBP CBP	Homo sapiens (Human)	2442
HPV-31_E1^E4	O75369	FLNB	1.45874e-05	6.21335e-11	1	0.68551	ME7.16	FLNB_HUMAN	reviewed	Filamin-B (FLN-B) (ABP-278) (ABP-280 homolog) (Actin-binding-like protein) (Beta-filamin) (Filamin homolog 1) (Fh1) (Filamin-3) (Thyroid autoantigen) (Truncated actin-binding protein) (Truncated ABP)	FLNB FLN1L FLN3 TABP TAP	Homo sapiens (Human)	2602
HPV-31_L1	Q9UGM3	DMBT1	1.37465e-05	6.21335e-11	1	0.68551	ME7.22	DMBT1_HUMAN	reviewed	Deleted in malignant brain tumors 1 protein (Glycoprotein 340) (Gp-340) (Hensin) (Salivary agglutinin) (SAG) (Surfactant pulmonary-associated D-binding protein)	DMBT1 GP340	Homo sapiens (Human)	2413
HPV-31_L1	Q96Q15	SMG1	1.34815e-05	6.21335e-11	1	0.68551	ME9.12	SMG1_HUMAN	reviewed	Serine/threonine-protein kinase SMG1 (SMG-1) (hSMG-1) (EC 2.7.11.1) (61E3.4) (Lambda/iota protein kinase C-interacting protein) (Lambda-interacting protein)	SMG1 ATX KIAA0421 LIP	Homo sapiens (Human)	3661
HPV-31_E7	Q93008	USP9X	1.1866e-05	6.21335e-11	1	0.68551	ME7.19	USP9X_HUMAN	reviewed	Probable ubiquitin carboxyl-terminal hydrolase FAF-X (EC 3.4.19.12) (Deubiquitinating enzyme FAF-X) (Fat facets in mammals) (hFAM) (Fat facets protein-related, X-linked) (Ubiquitin thioesterase FAF-X) (Ubiquitin-specific protease 9, X chromosome) (Ubiquitin-specific-processing protease FAF-X)	USP9X DFFRX FAM USP9	Homo sapiens (Human)	2570
HPV-31_E7	A4UGR9	XIRP2	1.18555e-05	6.21335e-11	1	0.68551	ME6.23	XIRP2_HUMAN	reviewed	Xin actin-binding repeat-containing protein 2 (Beta-xin) (Cardiomyopathy-associated protein 3) (Xeplin)	XIRP2 CMYA3	Homo sapiens (Human)	3374
HPV-31_L2	Q8WYP5	ELYS	1.15267e-05	6.21335e-11	1	0.68551	ME7.20	ELYS_HUMAN	reviewed	Protein ELYS (Embryonic large molecule derived from yolk sac) (Protein MEL-28) (Putative AT-hook-containing transcription factor 1)	AHCTF1 ELYS TMBS62 MSTP108	Homo sapiens (Human)	2266
HPV-31_L1	Q8TDX9	PK1L1	1.13635e-05	6.21335e-11	1	0.68551	ME7.22	PK1L1_HUMAN	reviewed	Polycystic kidney disease protein 1-like 1 (PC1-like 1 protein) (Polycystin-1L1)	PKD1L1 UNQ5785/PRO19563	Homo sapiens (Human)	2849
HPV-31_L2	P18583	SON	1.10316e-05	6.21335e-11	1	0.68551	ME7.20	SON_HUMAN	reviewed	Protein SON (Bax antagonist selected in saccharomyces 1) (BASS1) (Negative regulatory element-binding protein) (NRE-binding protein) (Protein DBP-5) (SON3)	SON C21orf50 DBP5 KIAA1019 NREBP HSPC310 HSPC312	Homo sapiens (Human)	2426
HPV-31_E7	Q5VST9	OBSCN	7.98682e-06	6.21335e-11	1	0.68551	ME7.19	OBSCN_HUMAN	reviewed	Obscurin (EC 2.7.11.1) (Obscurin-RhoGEF) (Obscurin-myosin light chain kinase) (Obscurin-MLCK)	OBSCN KIAA1556 KIAA1639	Homo sapiens (Human)	7968
HPV-31_E7	Q4G0P3	HYDIN	6.02253e-06	6.21335e-11	1	0.68551	ME7.19	HYDIN_HUMAN	reviewed	Hydrocephalus-inducing protein homolog	HYDIN HYDIN1 KIAA1864	Homo sapiens (Human)	5121
HPV-31_E6	P43686	PRS6B	0.0014342	0.747163	0.642424	0.670919	ME5.18,ME6.17,ME7.18,ME8.2	PRS6B_HUMAN	reviewed	26S protease regulatory subunit 6B (26S proteasome AAA-ATPase subunit RPT3) (MB67-interacting protein) (MIP224) (Proteasome 26S subunit ATPase 4) (Tat-binding protein 7) (TBP-7)	PSMC4 MIP224 TBP7	Homo sapiens (Human)	418
HPV-31_E1	Q9Y4W2	LAS1L	0.000421885	0.422757	0.788396	0.670889	ME7.23,ME9.10	LAS1L_HUMAN	reviewed	Ribosomal biogenesis protein LAS1L (Protein LAS1 homolog)	LAS1L MSTP060	Homo sapiens (Human)	734
HPV-31_E5	P45880	VDAC2	0.00206104	0.646994	0.685877	0.669805	ME6.18,ME7.17,ME9.6	VDAC2_HUMAN	reviewed	Voltage-dependent anion-selective channel protein 2 (VDAC-2) (hVDAC2) (Outer mitochondrial membrane protein porin 2)	VDAC2	Homo sapiens (Human)	294
HPV-31_E5	O14980	XPO1	0.000163675	0.311376	0.836934	0.669796	ME6.18,ME7.17	XPO1_HUMAN	reviewed	Exportin-1 (Exp1) (Chromosome region maintenance 1 protein homolog)	XPO1 CRM1	Homo sapiens (Human)	1071
HPV-31_L2	O95831	AIFM1	0.00749516	0.972686	0.539193	0.66977	ME5.22,ME6.21,ME7.20,ME8.7,ME9.7	AIFM1_HUMAN	reviewed	Apoptosis-inducing factor 1, mitochondrial (EC 1.-.-.-) (Programmed cell death protein 8)	AIFM1 AIF PDCD8	Homo sapiens (Human)	613
HPV-31_L1	P11387	TOP1	0.000621808	0.757685	0.617416	0.657017	ME6.20,ME7.22,ME8.10,ME9.12	TOP1_HUMAN	reviewed	DNA topoisomerase 1 (EC 5.99.1.2) (DNA topoisomerase I)	TOP1	Homo sapiens (Human)	765
HPV-31_E6	P28070	PSB4	0.00271222	0.873806	0.565049	0.656958	ME5.18,ME6.17,ME7.18,ME8.2,ME9.5	PSB4_HUMAN	reviewed	Proteasome subunit beta type-4 (EC 3.4.25.1) (26 kDa prosomal protein) (HsBPROS26) (PROS-26) (Macropain beta chain) (Multicatalytic endopeptidase complex beta chain) (Proteasome beta chain) (Proteasome chain 3) (HsN3)	PSMB4 PROS26	Homo sapiens (Human)	264
HPV-31_L2	Q8WXX5	DNJC9	0.000378577	0.43037	0.758982	0.653074	ME7.20,ME9.7	DNJC9_HUMAN	reviewed	DnaJ homolog subfamily C member 9 (DnaJ protein SB73)	DNAJC9	Homo sapiens (Human)	260
HPV-31_L1	Q9BYG3	MK67I	0.000339127	0.430014	0.753313	0.649078	ME8.10,ME9.12	MK67I_HUMAN	reviewed	MKI67 FHA domain-interacting nucleolar phosphoprotein (Nucleolar phosphoprotein Nopp34) (Nucleolar protein interacting with the FHA domain of pKI-67) (hNIFK)	MKI67IP NIFK NOPP34	Homo sapiens (Human)	293
HPV-31_E1^E4	P17096	HMGA1	0.00158614	0.429722	0.752937	0.648737	ME6.16,ME8.5	HMGA1_HUMAN	reviewed	High mobility group protein HMG-I/HMG-Y (HMG-I(Y)) (High mobility group AT-hook protein 1) (High mobility group protein A1) (High mobility group protein R)	HMGA1 HMGIY	Homo sapiens (Human)	107
HPV-31_E5	Q16775	GLO2	0.00135098	0.565766	0.682623	0.642509	ME5.14,ME7.17,ME9.6	GLO2_HUMAN	reviewed	Hydroxyacylglutathione hydrolase, mitochondrial (EC 3.1.2.6) (Glyoxalase II) (Glx II)	HAGH GLO2 HAGH1	Homo sapiens (Human)	308
HPV-31_L2	P55735	SEC13	0.00031763	0.43037	0.736035	0.637343	ME7.20,ME9.7	SEC13_HUMAN	reviewed	Protein SEC13 homolog (SEC13-like protein 1) (SEC13-related protein)	SEC13 D3S1231E SEC13L1 SEC13R	Homo sapiens (Human)	322
HPV-31_E1^E4	P23527	H2B1O	0.0120731	0.664755	0.625432	0.633909	ME6.16,ME8.5,ME9.3	H2B1O_HUMAN	reviewed	Histone H2B type 1-O (Histone H2B.2) (Histone H2B.n) (H2B/n)	HIST1H2BO H2BFH H2BFN	Homo sapiens (Human)	126
HPV-31_E1^E4	P33778	H2B1B	0.0120731	0.664755	0.625432	0.633909	ME6.16,ME8.5,ME9.3	H2B1B_HUMAN	reviewed	Histone H2B type 1-B (Histone H2B.1) (Histone H2B.f) (H2B/f)	HIST1H2BB H2BFF	Homo sapiens (Human)	126
HPV-31_E1^E4	Q16778	H2B2E	0.0120731	0.664755	0.625432	0.633909	ME6.16,ME8.5,ME9.3	H2B2E_HUMAN	reviewed	Histone H2B type 2-E (Histone H2B-GL105) (Histone H2B.q) (H2B/q)	HIST2H2BE H2BFQ	Homo sapiens (Human)	126
HPV-31_E1^E4	Q8N257	H2B3B	0.0120731	0.664755	0.625432	0.633909	ME6.16,ME8.5,ME9.3	H2B3B_HUMAN	reviewed	Histone H2B type 3-B (H2B type 12)	HIST3H2BB	Homo sapiens (Human)	126
HPV-31_E5	Q99623	PHB2	0.001462	6.21335e-11	0.922916	0.632677	ME7.17	PHB2_HUMAN	reviewed	Prohibitin-2 (B-cell receptor-associated protein BAP37) (D-prohibitin) (Repressor of estrogen receptor activity)	PHB2 BAP REA	Homo sapiens (Human)	299
HPV-31_L2	Q92598	HS105	0.00267062	0.780883	0.563041	0.626912	ME5.22,ME6.21,ME7.20,ME8.7,ME9.7	HS105_HUMAN	reviewed	Heat shock protein 105 kDa (Antigen NY-CO-25) (Heat shock 110 kDa protein)	HSPH1 HSP105 HSP110 KIAA0201	Homo sapiens (Human)	858
HPV-31_E6	P62191	PRS4	0.00163455	0.778945	0.560371	0.624478	ME5.18,ME7.18,ME8.2,ME9.5	PRS4_HUMAN	reviewed	26S protease regulatory subunit 4 (P26s4) (26S proteasome AAA-ATPase subunit RPT2) (Proteasome 26S subunit ATPase 1)	PSMC1	Homo sapiens (Human)	440
HPV-31_E7	Q9NWU2	GID8	0.00102478	0.43066	0.705758	0.616682	ME6.23,ME9.8	GID8_HUMAN	reviewed	Glucose-induced degradation protein 8 homolog (Two hybrid-associated protein 1 with RanBPM) (Twa1)	GID8 C20orf11	Homo sapiens (Human)	228
HPV-31_E6	P28072	PSB6	0.000799935	0.403161	0.714305	0.614055	ME5.18,ME6.17	PSB6_HUMAN	reviewed	Proteasome subunit beta type-6 (EC 3.4.25.1) (Macropain delta chain) (Multicatalytic endopeptidase complex delta chain) (Proteasome delta chain) (Proteasome subunit Y)	PSMB6 LMPY Y	Homo sapiens (Human)	239
HPV-31_E1^E4	P41091	IF2G	0.000418473	0.420319	0.705088	0.613028	ME8.5,ME9.3	IF2G_HUMAN	reviewed	Eukaryotic translation initiation factor 2 subunit 3 (Eukaryotic translation initiation factor 2 subunit gamma X) (eIF-2-gamma X) (eIF-2gX)	EIF2S3 EIF2G	Homo sapiens (Human)	472
HPV-31_E6	Q9Y5L4	TIM13	0.00290916	0.612648	0.616397	0.611584	ME5.18,ME7.18,ME8.2	TIM13_HUMAN	reviewed	Mitochondrial import inner membrane translocase subunit Tim13	TIMM13 TIM13B TIMM13A TIMM13B	Homo sapiens (Human)	95
HPV-31_E5	O43175	SERA	0.001	0.595306	0.621493	0.609715	ME6.18,ME7.17,ME9.6	SERA_HUMAN	reviewed	D-3-phosphoglycerate dehydrogenase (3-PGDH) (EC 1.1.1.95)	PHGDH PGDH3	Homo sapiens (Human)	533
HPV-31_E5	O60884	DNJA2	0.00700954	0.823009	0.517543	0.608746	ME6.18,ME7.17,ME8.6,ME9.6	DNJA2_HUMAN	reviewed	DnaJ homolog subfamily A member 2 (Cell cycle progression restoration gene 3 protein) (Dnj3) (Dj3) (HIRA-interacting protein 4) (Renal carcinoma antigen NY-REN-14)	DNAJA2 CPR3 HIRIP4	Homo sapiens (Human)	412
HPV-31_E5	O75477	ERLN1	0.00114377	0.364474	0.722707	0.607881	ME6.18,ME7.17	ERLN1_HUMAN	reviewed	Erlin-1 (Endoplasmic reticulum lipid raft-associated protein 1) (Protein KE04) (Stomatin-prohibitin-flotillin-HflC/K domain-containing protein 1) (SPFH domain-containing protein 1)	ERLIN1 C10orf69 KE04 KEO4 SPFH1	Homo sapiens (Human)	346
HPV-31_E5	P24534	EF1B	0.00130991	0.646994	0.595216	0.607651	ME6.18,ME7.17,ME9.6	EF1B_HUMAN	reviewed	Elongation factor 1-beta (EF-1-beta)	EEF1B2 EEF1B EF1B	Homo sapiens (Human)	225
HPV-31_E6	P60900	PSA6	0.00154667	0.634147	0.598557	0.605979	ME5.18,ME6.17,ME7.18	PSA6_HUMAN	reviewed	Proteasome subunit alpha type-6 (EC 3.4.25.1) (27 kDa prosomal protein) (PROS-27) (p27K) (Macropain iota chain) (Multicatalytic endopeptidase complex iota chain) (Proteasome iota chain)	PSMA6 PROS27	Homo sapiens (Human)	246
HPV-31_E5	Q16186	ADRM1	0.000386535	0.430666	0.674332	0.595137	ME7.17,ME9.6	ADRM1_HUMAN	reviewed	Proteasomal ubiquitin receptor ADRM1 (110 kDa cell membrane glycoprotein) (Gp110) (Adhesion-regulating molecule 1) (ARM-1) (Proteasome regulatory particle non-ATPase 13) (hRpn13) (Rpn13 homolog)	ADRM1 GP110	Homo sapiens (Human)	407
HPV-31_E1	O75746	CMC1	0.000772567	0.77757	0.514579	0.592658	ME6.22,ME7.23,ME8.11,ME9.10	CMC1_HUMAN	reviewed	Calcium-binding mitochondrial carrier protein Aralar1 (Mitochondrial aspartate glutamate carrier 1) (Solute carrier family 25 member 12)	SLC25A12 ARALAR1	Homo sapiens (Human)	678
HPV-31_L2	Q9UBX3	DIC	0.000475979	0.651718	0.557848	0.583488	ME6.21,ME7.20,ME9.7	DIC_HUMAN	reviewed	Mitochondrial dicarboxylate carrier (Solute carrier family 25 member 10)	SLC25A10 DIC	Homo sapiens (Human)	287
HPV-31_L1	P78371	TCPB	0.00106356	0.775395	0.49728	0.58013	ME6.20,ME7.22,ME8.10,ME9.12	TCPB_HUMAN	reviewed	T-complex protein 1 subunit beta (TCP-1-beta) (CCT-beta)	CCT2 99D8.1 CCTB	Homo sapiens (Human)	535
HPV-31_E1^E4	P27708	PYR1	0.0019581	0.983793	0.398557	0.576756	ME5.17,ME6.16,ME7.16,ME8.5,ME9.3	PYR1_HUMAN	reviewed	CAD protein [Includes: Glutamine-dependent carbamoyl-phosphate synthase (EC 6.3.5.5); Aspartate carbamoyltransferase (EC 2.1.3.2); Dihydroorotase (EC 3.5.2.3)]	CAD	Homo sapiens (Human)	2225
HPV-31_L1	Q9BZE4	NOG1	0.000239044	0.386207	0.667133	0.576484	ME8.10,ME9.12	NOG1_HUMAN	reviewed	Nucleolar GTP-binding protein 1 (Chronic renal failure gene protein) (GTP-binding protein NGB)	GTPBP4 CRFG NOG1	Homo sapiens (Human)	634
HPV-31_L2	P54652	HSP72	0.006819	0.938795	0.415415	0.574458	ME5.22,ME6.21,ME7.20,ME8.7,ME9.7	HSP72_HUMAN	reviewed	Heat shock-related 70 kDa protein 2 (Heat shock 70 kDa protein 2)	HSPA2	Homo sapiens (Human)	639
HPV-31_E5	P25786	PSA1	0.00205522	0.62764	0.554929	0.574068	ME6.18,ME7.17,ME8.6	PSA1_HUMAN	reviewed	Proteasome subunit alpha type-1 (EC 3.4.25.1) (30 kDa prosomal protein) (PROS-30) (Macropain subunit C2) (Multicatalytic endopeptidase complex subunit C2) (Proteasome component C2) (Proteasome nu chain)	PSMA1 HC2 NU PROS30 PSC2	Homo sapiens (Human)	263
HPV-31_E6	P35998	PRS7	0.00140195	0.606371	0.56303	0.573055	ME5.18,ME7.18,ME9.5	PRS7_HUMAN	reviewed	26S protease regulatory subunit 7 (26S proteasome AAA-ATPase subunit RPT1) (Proteasome 26S subunit ATPase 2) (Protein MSS1)	PSMC2 MSS1	Homo sapiens (Human)	433
HPV-31_E6	A6NFY4	T194B	0.000419412	0.418496	0.646064	0.572005	ME8.2,ME9.5	T194B_HUMAN	reviewed	Transmembrane protein 194B	TMEM194B	Homo sapiens (Human)	417
HPV-31_E5	P08195	4F2	0.000415965	0.424459	0.643075	0.571795	ME6.18,ME7.17	4F2_HUMAN	reviewed	4F2 cell-surface antigen heavy chain (4F2hc) (4F2 heavy chain antigen) (Lymphocyte activation antigen 4F2 large subunit) (CD antigen CD98)	SLC3A2 MDU1	Homo sapiens (Human)	630
HPV-31_E2	O15355	PPM1G	0.000328426	6.21335e-11	0.831725	0.570158	ME7.21	PPM1G_HUMAN	reviewed	Protein phosphatase 1G (EC 3.1.3.16) (Protein phosphatase 1C) (Protein phosphatase 2C isoform gamma) (PP2C-gamma) (Protein phosphatase magnesium-dependent 1 gamma)	PPM1G PPM1C	Homo sapiens (Human)	546
HPV-31_E6	Q13200	PSMD2	0.00115654	0.770706	0.484371	0.569834	ME5.18,ME6.17,ME7.18,ME9.5	PSMD2_HUMAN	reviewed	26S proteasome non-ATPase regulatory subunit 2 (26S proteasome regulatory subunit RPN1) (26S proteasome regulatory subunit S2) (26S proteasome subunit p97) (Protein 55.11) (Tumor necrosis factor type 1 receptor-associated protein 2)	PSMD2 TRAP2	Homo sapiens (Human)	908
HPV-31_E6	Q15293	RCN1	0.000367247	6.21335e-11	0.830524	0.569335	ME5.18	RCN1_HUMAN	reviewed	Reticulocalbin-1	RCN1 RCN	Homo sapiens (Human)	331
HPV-31_L2	P50402	EMD	0.00105246	0.423953	0.637006	0.567483	ME6.21,ME7.20	EMD_HUMAN	reviewed	Emerin	EMD EDMD STA	Homo sapiens (Human)	254
HPV-31_E1^E4	Q92804	RBP56	0.000870859	0.623507	0.544603	0.565707	ME6.16,ME7.16,ME8.5	RBP56_HUMAN	reviewed	TATA-binding protein-associated factor 2N (68 kDa TATA-binding protein-associated factor) (TAF(II)68) (TAFII68) (RNA-binding protein 56)	TAF15 RBP56 TAF2N	Homo sapiens (Human)	592
HPV-31_E7	Q12834	CDC20	0.00067259	0.609732	0.549727	0.564968	ME6.23,ME7.19,ME9.8	CDC20_HUMAN	reviewed	Cell division cycle protein 20 homolog (p55CDC)	CDC20	Homo sapiens (Human)	499
HPV-31_E5	P49327	FAS	8.91871e-05	0.396604	0.640485	0.561424	ME7.17,ME9.6	FAS_HUMAN	reviewed	Fatty acid synthase (EC 2.3.1.85) [Includes: [Acyl-carrier-protein] S-acetyltransferase (EC 2.3.1.38); [Acyl-carrier-protein] S-malonyltransferase (EC 2.3.1.39); 3-oxoacyl-[acyl-carrier-protein] synthase (EC 2.3.1.41); 3-oxoacyl-[acyl-carrier-protein] reductase (EC 1.1.1.100); 3-hydroxyacyl-[acyl-carrier-protein] dehydratase (EC 4.2.1.59); Enoyl-[acyl-carrier-protein] reductase (EC 1.3.1.10); Ole…	FASN FAS	Homo sapiens (Human)	2511
HPV-31_L2	P16989	DBPA	0.00135247	0.669791	0.507838	0.554786	ME5.22,ME7.20,ME9.7	DBPA_HUMAN	reviewed	DNA-binding protein A (Cold shock domain-containing protein A) (Single-strand DNA-binding protein NF-GMB)	CSDA DBPA	Homo sapiens (Human)	372
HPV-31_E1	O15131	IMA5	0.000266653	0.334366	0.656267	0.553041	ME7.23,ME8.11	IMA5_HUMAN	reviewed	Importin subunit alpha-6 (Karyopherin subunit alpha-5)	KPNA5	Homo sapiens (Human)	536
HPV-31_E5	P25686	DNJB2	0.000341736	6.21335e-11	0.806673	0.552984	ME7.17	DNJB2_HUMAN	reviewed	DnaJ homolog subfamily B member 2 (DnaJ protein homolog 1) (Heat shock 40 kDa protein 3) (Heat shock protein J1) (HSJ-1)	DNAJB2 HSJ1 HSPF3	Homo sapiens (Human)	324
HPV-31_E5	P28074	PSB5	0.0017118	0.629421	0.522432	0.552338	ME6.18,ME8.6,ME9.6	PSB5_HUMAN	reviewed	Proteasome subunit beta type-5 (EC 3.4.25.1) (Macropain epsilon chain) (Multicatalytic endopeptidase complex epsilon chain) (Proteasome chain 6) (Proteasome epsilon chain) (Proteasome subunit MB1) (Proteasome subunit X)	PSMB5 LMPX MB1 X	Homo sapiens (Human)	263
HPV-31_E6	P49721	PSB2	0.00316307	0.680447	0.494542	0.548971	ME5.18,ME6.17,ME8.2	PSB2_HUMAN	reviewed	Proteasome subunit beta type-2 (EC 3.4.25.1) (Macropain subunit C7-I) (Multicatalytic endopeptidase complex subunit C7-I) (Proteasome component C7-I)	PSMB2	Homo sapiens (Human)	201
HPV-31_E7	Q9UNX3	RL26L	0.00550023	6.21335e-11	0.798148	0.547171	ME5.19	RL26L_HUMAN	reviewed	60S ribosomal protein L26-like 1	RPL26L1 RPL26P1	Homo sapiens (Human)	145
HPV-31_E1^E4	P18754	RCC1	0.000389254	6.21335e-11	0.794025	0.544314	ME8.5	RCC1_HUMAN	reviewed	Regulator of chromosome condensation (Cell cycle regulatory protein) (Chromosome condensation protein 1)	RCC1 CHC1	Homo sapiens (Human)	421
HPV-31_E1	O00505	IMA3	0.000238055	6.21335e-11	0.793224	0.543764	ME6.22	IMA3_HUMAN	reviewed	Importin subunit alpha-3 (Importin alpha Q2) (Qip2) (Karyopherin subunit alpha-3) (SRP1-gamma)	KPNA3 QIP2	Homo sapiens (Human)	521
HPV-31_E1	Q5SY16	NOL9	0.000139273	6.21335e-11	0.791489	0.542574	ME7.23	NOL9_HUMAN	reviewed	Polynucleotide 5'-hydroxyl-kinase NOL9 (EC 2.7.1.-) (Nucleolar protein 9)	NOL9	Homo sapiens (Human)	702
HPV-31_E1	P63173	RL38	0.0104588	0.807492	0.425461	0.540856	ME5.21,ME7.23,ME8.11,ME9.10	RL38_HUMAN	reviewed	60S ribosomal protein L38	RPL38	Homo sapiens (Human)	70
HPV-31_L2	Q8N1F7	NUP93	0.000155794	6.21335e-11	0.787233	0.539657	ME7.20	NUP93_HUMAN	reviewed	Nuclear pore complex protein Nup93 (93 kDa nucleoporin) (Nucleoporin Nup93)	NUP93 KIAA0095	Homo sapiens (Human)	819
HPV-31_L1	P18077	RL35A	0.0019551	0.661596	0.488651	0.539109	ME7.22,ME8.10,ME9.12	RL35A_HUMAN	reviewed	60S ribosomal protein L35a (Cell growth-inhibiting gene 33 protein)	RPL35A GIG33	Homo sapiens (Human)	110
HPV-31_E8^E2C	Q6P3X8	PGBD2	0.000200335	6.21335e-11	0.781883	0.53599	ME8.4	PGBD2_HUMAN	reviewed	PiggyBac transposable element-derived protein 2	PGBD2	Homo sapiens (Human)	592
HPV-31_E5	Q8NDC0	MISSL	0.00104112	6.21335e-11	0.779427	0.534311	ME5.14	MISSL_HUMAN	reviewed	MAPK-interacting and spindle-stabilizing protein-like (Mitogen-activated protein kinase 1-interacting protein 1-like)	MAPK1IP1L C14orf32	Homo sapiens (Human)	245
HPV-31_E2	P14136	GFAP	0.000846758	6.21335e-11	0.775594	0.531682	ME8.9	GFAP_HUMAN	reviewed	Glial fibrillary acidic protein (GFAP)	GFAP	Homo sapiens (Human)	432
HPV-31_E5	P25788	PSA3	0.0017118	0.629421	0.48963	0.529852	ME6.18,ME8.6,ME9.6	PSA3_HUMAN	reviewed	Proteasome subunit alpha type-3 (EC 3.4.25.1) (Macropain subunit C8) (Multicatalytic endopeptidase complex subunit C8) (Proteasome component C8)	PSMA3 HC8 PSC8	Homo sapiens (Human)	255
HPV-31_E6	Q9BYD6	RM01	0.000222081	6.21335e-11	0.772685	0.529685	ME9.5	RM01_HUMAN	reviewed	39S ribosomal protein L1, mitochondrial (L1mt) (MRP-L1)	MRPL1 BM-022	Homo sapiens (Human)	325
HPV-31_E6	P20618	PSB1	0.00241467	0.758154	0.425923	0.525902	ME5.18,ME6.17,ME7.18,ME8.2	PSB1_HUMAN	reviewed	Proteasome subunit beta type-1 (EC 3.4.25.1) (Macropain subunit C5) (Multicatalytic endopeptidase complex subunit C5) (Proteasome component C5) (Proteasome gamma chain)	PSMB1 PSC5	Homo sapiens (Human)	241
HPV-31_L2	A5A3E0	POTEF	9.55474e-05	6.21335e-11	0.765913	0.525042	ME5.22	POTEF_HUMAN	reviewed	POTE ankyrin domain family member F (ANKRD26-like family C member 1B) (Chimeric POTE-actin protein)	POTEF A26C1B	Homo sapiens (Human)	1075
HPV-31_L1	Q9BQ39	DDX50	0.000562347	0.641164	0.476453	0.524435	ME6.20,ME7.22,ME9.12	DDX50_HUMAN	reviewed	ATP-dependent RNA helicase DDX50 (EC 3.6.4.13) (DEAD box protein 50) (Gu-beta) (Nucleolar protein Gu2)	DDX50	Homo sapiens (Human)	737
HPV-31_E7	P17987	TCPA	0.00246285	0.809945	0.399166	0.523539	ME6.23,ME7.19,ME8.8,ME9.8	TCPA_HUMAN	reviewed	T-complex protein 1 subunit alpha (TCP-1-alpha) (CCT-alpha)	TCP1 CCT1 CCTA	Homo sapiens (Human)	556
HPV-31_L2	Q3ZCQ8	TIM50	0.000384441	0.423953	0.5636	0.517158	ME6.21,ME7.20	TIM50_HUMAN	reviewed	Mitochondrial import inner membrane translocase subunit TIM50	TIMM50 TIM50 PRO1512	Homo sapiens (Human)	353
HPV-31_E7	P27348	1433T	0.00107628	0.656506	0.458499	0.516864	ME6.23,ME7.19,ME9.8	1433T_HUMAN	reviewed	14-3-3 protein theta (14-3-3 protein T-cell) (14-3-3 protein tau) (Protein HS1)	YWHAQ	Homo sapiens (Human)	245
HPV-31_L2	Q16576	RBBP7	0.000243814	6.21335e-11	0.749644	0.51389	ME7.20	RBBP7_HUMAN	reviewed	Histone-binding protein RBBP7 (Histone acetyltransferase type B subunit 2) (Nucleosome-remodeling factor subunit RBAP46) (Retinoblastoma-binding protein 7) (RBBP-7) (Retinoblastoma-binding protein p46)	RBBP7 RBAP46	Homo sapiens (Human)	425
HPV-31_E5	Q92616	GCN1L	4.14809e-05	6.21335e-11	0.749575	0.513841	ME7.17	GCN1L_HUMAN	reviewed	Translational activator GCN1 (HsGCN1) (GCN1-like protein 1)	GCN1L1 KIAA0219	Homo sapiens (Human)	2671
HPV-31_E6	P16949	STMN1	0.00041286	6.21335e-11	0.747574	0.512472	ME5.18	STMN1_HUMAN	reviewed	Stathmin (Leukemia-associated phosphoprotein p18) (Metablastin) (Oncoprotein 18) (Op18) (Phosphoprotein p19) (pp19) (Prosolin) (Protein Pr22) (pp17)	STMN1 C1orf215 LAP18 OP18	Homo sapiens (Human)	149
HPV-31_L2	O75746	CMC1	0.000682356	0.678231	0.438626	0.509941	ME6.21,ME7.20,ME8.7	CMC1_HUMAN	reviewed	Calcium-binding mitochondrial carrier protein Aralar1 (Mitochondrial aspartate glutamate carrier 1) (Solute carrier family 25 member 12)	SLC25A12 ARALAR1	Homo sapiens (Human)	678
HPV-31_L2	P12235	ADT1	0.00309746	0.623525	0.462127	0.509187	ME6.21,ME8.7,ME9.7	ADT1_HUMAN	reviewed	ADP/ATP translocase 1 (ADP,ATP carrier protein 1) (ADP,ATP carrier protein, heart/skeletal muscle isoform T1) (Adenine nucleotide translocator 1) (ANT 1) (Solute carrier family 25 member 4)	SLC25A4 ANT1	Homo sapiens (Human)	298
HPV-31_L2	Q8N4Q1	MIA40	0.000589595	0.384386	0.568765	0.508492	ME6.21,ME7.20	MIA40_HUMAN	reviewed	Mitochondrial intermembrane space import and assembly protein 40 (Coiled-coil-helix-coiled-coil-helix domain-containing protein 4)	CHCHD4 MIA40	Homo sapiens (Human)	142
HPV-31_E7	P25789	PSA4	0.00122572	0.608682	0.466822	0.507815	ME6.23,ME7.19,ME8.8	PSA4_HUMAN	reviewed	Proteasome subunit alpha type-4 (EC 3.4.25.1) (Macropain subunit C9) (Multicatalytic endopeptidase complex subunit C9) (Proteasome component C9) (Proteasome subunit L)	PSMA4 HC9 PSC9	Homo sapiens (Human)	261
HPV-31_E7	P24864	CCNE1	0.000221508	6.21335e-11	0.738614	0.506329	ME7.19	CCNE1_HUMAN	reviewed	G1/S-specific cyclin-E1	CCNE1 CCNE	Homo sapiens (Human)	410
HPV-31_E6	O00487	PSDE	0.000581148	0.416015	0.550648	0.505831	ME7.18,ME8.2	PSDE_HUMAN	reviewed	26S proteasome non-ATPase regulatory subunit 14 (EC 3.4.19.-) (26S proteasome regulatory subunit RPN11) (26S proteasome-associated PAD1 homolog 1)	PSMD14 POH1	Homo sapiens (Human)	310
HPV-31_L1	P50991	TCPD	0.000897905	0.77798	0.387304	0.505536	ME6.20,ME7.22,ME8.10,ME9.12	TCPD_HUMAN	reviewed	T-complex protein 1 subunit delta (TCP-1-delta) (CCT-delta) (Stimulator of TAR RNA-binding)	CCT4 CCTD SRB	Homo sapiens (Human)	539
HPV-31_L1	Q9Y5A9	YTHD2	0.00179661	0.774577	0.388311	0.505182	ME6.20,ME7.22,ME8.10,ME9.12	YTHD2_HUMAN	reviewed	YTH domain family protein 2 (CLL-associated antigen KW-14) (High-glucose-regulated protein 8) (Renal carcinoma antigen NY-REN-2)	YTHDF2 HGRG8	Homo sapiens (Human)	579
HPV-31_L2	Q14498	RBM39	0.000527923	0.401984	0.554625	0.504228	ME7.20,ME9.7	RBM39_HUMAN	reviewed	RNA-binding protein 39 (Hepatocellular carcinoma protein 1) (RNA-binding motif protein 39) (RNA-binding region-containing protein 2) (Splicing factor HCC1)	RBM39 HCC1 RNPC2	Homo sapiens (Human)	530
HPV-31_E5	O14818	PSA7	0.00396132	0.966999	0.298218	0.502803	ME5.14,ME6.18,ME7.17,ME8.6,ME9.6	PSA7_HUMAN	reviewed	Proteasome subunit alpha type-7 (EC 3.4.25.1) (Proteasome subunit RC6-1) (Proteasome subunit XAPC7)	PSMA7 HSPC	Homo sapiens (Human)	248
HPV-31_E2	Q5T749	KPRP	0.00164486	6.21335e-11	0.733254	0.502662	ME8.9	KPRP_HUMAN	reviewed	Keratinocyte proline-rich protein (hKPRP)	KPRP C1orf45	Homo sapiens (Human)	579
HPV-31_E6	O43852	CALU	0.00129103	0.352829	0.569415	0.499206	ME5.18,ME8.2	CALU_HUMAN	reviewed	Calumenin (Crocalbin) (IEF SSP 9302)	CALU	Homo sapiens (Human)	315
HPV-31_E6	P28074	PSB5	0.0015648	0.553344	0.477568	0.49811	ME5.18,ME6.17,ME7.18	PSB5_HUMAN	reviewed	Proteasome subunit beta type-5 (EC 3.4.25.1) (Macropain epsilon chain) (Multicatalytic endopeptidase complex epsilon chain) (Proteasome chain 6) (Proteasome epsilon chain) (Proteasome subunit MB1) (Proteasome subunit X)	PSMB5 LMPX MB1 X	Homo sapiens (Human)	263
HPV-31_L2	P27708	PYR1	0.00159737	0.909057	0.316348	0.497341	ME5.22,ME6.21,ME7.20,ME8.7,ME9.7	PYR1_HUMAN	reviewed	CAD protein [Includes: Glutamine-dependent carbamoyl-phosphate synthase (EC 6.3.5.5); Aspartate carbamoyltransferase (EC 2.1.3.2); Dihydroorotase (EC 3.5.2.3)]	CAD	Homo sapiens (Human)	2225
HPV-31_L1	P07305	H10	0.00196666	0.812776	0.359143	0.496973	ME6.20,ME7.22,ME8.10,ME9.12	H10_HUMAN	reviewed	Histone H1.0 (Histone H1') (Histone H1(0))	H1F0 H1FV	Homo sapiens (Human)	194
HPV-31_E5	P49721	PSB2	0.00288345	0.606609	0.450824	0.496219	ME5.14,ME6.18,ME9.6	PSB2_HUMAN	reviewed	Proteasome subunit beta type-2 (EC 3.4.25.1) (Macropain subunit C7-I) (Multicatalytic endopeptidase complex subunit C7-I) (Proteasome component C7-I)	PSMB2	Homo sapiens (Human)	201
HPV-31_E1	Q15287	RNPS1	0.000306507	0.403149	0.541148	0.495348	ME7.23,ME9.10	RNPS1_HUMAN	reviewed	RNA-binding protein with serine-rich domain 1 (SR-related protein LDC2)	RNPS1 LDC2	Homo sapiens (Human)	305
HPV-31_L2	Q9Y241	HIG1A	0.000929253	0.384386	0.548876	0.494861	ME6.21,ME7.20	HIG1A_HUMAN	reviewed	HIG1 domain family member 1A, mitochondrial (Hypoxia-inducible gene 1 protein) (RCF1 homolog A) (RCF1a)	HIGD1A HIG1 HSPC010	Homo sapiens (Human)	93
HPV-31_E2	Q8WVC0	LEO1	0.000279986	6.21335e-11	0.72035	0.493809	ME8.9	LEO1_HUMAN	reviewed	RNA polymerase-associated protein LEO1 (Replicative senescence down-regulated leo1-like protein)	LEO1 RDL	Homo sapiens (Human)	666
HPV-31_E7	P62258	1433E	0.00197586	0.293496	0.58773	0.493459	ME5.19,ME7.19	1433E_HUMAN	reviewed	14-3-3 protein epsilon (14-3-3E)	YWHAE	Homo sapiens (Human)	255
HPV-31_E1^E4	O76021	RL1D1	0.000177801	6.21335e-11	0.719799	0.49343	ME6.16	RL1D1_HUMAN	reviewed	Ribosomal L1 domain-containing protein 1 (CATX-11) (Cellular senescence-inhibited gene protein) (Protein PBK1)	RSL1D1 CATX11 CSIG PBK1 L12	Homo sapiens (Human)	490
HPV-31_E6	Q14257	RCN2	0.00327079	0.805762	0.357076	0.4934	ME5.18,ME6.17,ME7.18,ME8.2	RCN2_HUMAN	reviewed	Reticulocalbin-2 (Calcium-binding protein ERC-55) (E6-binding protein) (E6BP)	RCN2 ERC55	Homo sapiens (Human)	317
HPV-31_L1	Q7Z2W4	ZCCHV	0.000234335	0.38038	0.546573	0.492041	ME7.22,ME9.12	ZCCHV_HUMAN	reviewed	Zinc finger CCCH-type antiviral protein 1 (ADP-ribosyltransferase diphtheria toxin-like 13) (ARTD13) (Zinc finger CCCH domain-containing protein 2) (Zinc finger antiviral protein) (ZAP)	ZC3HAV1 ZC3HDC2 PRO1677	Homo sapiens (Human)	902
HPV-31_L1	P57723	PCBP4	0.000219837	0.416364	0.530201	0.49192	ME7.22,ME9.12	PCBP4_HUMAN	reviewed	Poly(rC)-binding protein 4 (Alpha-CP4)	PCBP4	Homo sapiens (Human)	403
HPV-31_E6	P25788	PSA3	0.00150395	0.637151	0.430179	0.491481	ME5.18,ME6.17,ME9.5	PSA3_HUMAN	reviewed	Proteasome subunit alpha type-3 (EC 3.4.25.1) (Macropain subunit C8) (Multicatalytic endopeptidase complex subunit C8) (Proteasome component C8)	PSMA3 HC8 PSC8	Homo sapiens (Human)	255
HPV-31_E1	O60762	DPM1	0.000248863	6.21335e-11	0.716762	0.491349	ME7.23	DPM1_HUMAN	reviewed	Dolichol-phosphate mannosyltransferase (EC 2.4.1.83) (Dolichol-phosphate mannose synthase) (DPM synthase) (Dolichyl-phosphate beta-D-mannosyltransferase) (Mannose-P-dolichol synthase) (MPD synthase)	DPM1	Homo sapiens (Human)	260
HPV-31_E7	Q96S59	RANB9	0.000102865	0.425168	0.520697	0.488121	ME6.23,ME7.19	RANB9_HUMAN	reviewed	Ran-binding protein 9 (RanBP9) (BPM-L) (BPM90) (Ran-binding protein M) (RanBPM) (RanBP7)	RANBP9 RANBPM	Homo sapiens (Human)	729
HPV-31_E6	P25786	PSA1	0.00164835	0.593087	0.445071	0.488095	ME5.18,ME7.18,ME8.2	PSA1_HUMAN	reviewed	Proteasome subunit alpha type-1 (EC 3.4.25.1) (30 kDa prosomal protein) (PROS-30) (Macropain subunit C2) (Multicatalytic endopeptidase complex subunit C2) (Proteasome component C2) (Proteasome nu chain)	PSMA1 HC2 NU PROS30 PSC2	Homo sapiens (Human)	263
HPV-31_L1	O43251	RFOX2	0.000346588	6.21335e-11	0.711242	0.487565	ME7.22	RFOX2_HUMAN	reviewed	RNA binding protein fox-1 homolog 2 (Fox-1 homolog B) (Hexaribonucleotide-binding protein 2) (RNA-binding motif protein 9) (RNA-binding protein 9) (Repressor of tamoxifen transcriptional activity)	RBFOX2 FOX2 HRNBP2 RBM9 RTA	Homo sapiens (Human)	390
HPV-31_E8^E2C	Q96EL3	RM53	0.000487695	6.21335e-11	0.710236	0.486877	ME9.2	RM53_HUMAN	reviewed	39S ribosomal protein L53, mitochondrial (L53mt) (MRP-L53)	MRPL53	Homo sapiens (Human)	112
HPV-31_E7	Q13501	SQSTM	0.000407939	0.640561	0.421882	0.486839	ME6.23,ME7.19,ME9.8	SQSTM_HUMAN	reviewed	Sequestosome-1 (EBI3-associated protein of 60 kDa) (EBIAP) (p60) (Phosphotyrosine-independent ligand for the Lck SH2 domain of 62 kDa) (Ubiquitin-binding protein p62)	SQSTM1 ORCA OSIL	Homo sapiens (Human)	440
HPV-31_E6	P48556	PSMD8	0.000514945	0.418496	0.520199	0.485724	ME8.2,ME9.5	PSMD8_HUMAN	reviewed	26S proteasome non-ATPase regulatory subunit 8 (26S proteasome regulatory subunit RPN12) (26S proteasome regulatory subunit S14) (p31)	PSMD8	Homo sapiens (Human)	350
HPV-31_E5	P26641	EF1G	0.000888441	0.407006	0.523072	0.48415	ME6.18,ME7.17	EF1G_HUMAN	reviewed	Elongation factor 1-gamma (EF-1-gamma) (eEF-1B gamma)	EEF1G EF1G PRO1608	Homo sapiens (Human)	437
HPV-31_L2	Q07021	C1QBP	0.00654959	0.956942	0.274466	0.483434	ME5.22,ME6.21,ME7.20,ME8.7,ME9.7	C1QBP_HUMAN	reviewed	Complement component 1 Q subcomponent-binding protein, mitochondrial (ASF/SF2-associated protein p32) (Glycoprotein gC1qBP) (C1qBP) (Hyaluronan-binding protein 1) (Mitochondrial matrix protein p32) (gC1q-R protein) (p33)	C1QBP GC1QBP HABP1 SF2P32	Homo sapiens (Human)	282
HPV-31_L2	Q9BUF5	TBB6	0.00932393	0.998711	0.254977	0.482977	ME5.22,ME6.21,ME7.20,ME8.7,ME9.7	TBB6_HUMAN	reviewed	Tubulin beta-6 chain	TUBB6	Homo sapiens (Human)	446
HPV-31_E5	P60900	PSA6	0.00103733	0.670841	0.401443	0.482174	ME7.17,ME8.6,ME9.6	PSA6_HUMAN	reviewed	Proteasome subunit alpha type-6 (EC 3.4.25.1) (27 kDa prosomal protein) (PROS-27) (p27K) (Macropain iota chain) (Multicatalytic endopeptidase complex iota chain) (Proteasome iota chain)	PSMA6 PROS27	Homo sapiens (Human)	246
HPV-31_E2	P61964	WDR5	0.000182927	6.21335e-11	0.701202	0.480682	ME9.9	WDR5_HUMAN	reviewed	WD repeat-containing protein 5 (BMP2-induced 3-kb gene protein)	WDR5 BIG3	Homo sapiens (Human)	334
HPV-31_E1^E4	P05204	HMGN2	0.00576208	0.402847	0.518919	0.480049	ME8.5,ME9.3	HMGN2_HUMAN	reviewed	Non-histone chromosomal protein HMG-17 (High mobility group nucleosome-binding domain-containing protein 2)	HMGN2 HMG17	Homo sapiens (Human)	90
HPV-31_E5	Q15365	PCBP1	0.00390056	0.848791	0.31801	0.4799	ME6.18,ME7.17,ME8.6,ME9.6	PCBP1_HUMAN	reviewed	Poly(rC)-binding protein 1 (Alpha-CP1) (Heterogeneous nuclear ribonucleoprotein E1) (hnRNP E1) (Nucleic acid-binding protein SUB2.3)	PCBP1	Homo sapiens (Human)	356
HPV-31_E7	P63244	GBLP	0.00167646	0.540777	0.455882	0.479368	ME6.23,ME7.19,ME9.8	GBLP_HUMAN	reviewed	Guanine nucleotide-binding protein subunit beta-2-like 1 (Cell proliferation-inducing gene 21 protein) (Guanine nucleotide-binding protein subunit beta-like protein 12.3) (Human lung cancer oncogene 7 protein) (HLC-7) (Receptor for activated C kinase) (Receptor of activated protein kinase C 1) (RACK1)	GNB2L1 HLC7 PIG21	Homo sapiens (Human)	317
HPV-31_E7	P25205	MCM3	0.000164186	0.38133	0.524345	0.477096	ME6.23,ME7.19	MCM3_HUMAN	reviewed	DNA replication licensing factor MCM3 (EC 3.6.4.12) (DNA polymerase alpha holoenzyme-associated protein P1) (P1-MCM3) (RLF subunit beta) (p102)	MCM3	Homo sapiens (Human)	808
HPV-31_E5	P28070	PSB4	0.00208775	0.577301	0.434951	0.476291	ME7.17,ME8.6,ME9.6	PSB4_HUMAN	reviewed	Proteasome subunit beta type-4 (EC 3.4.25.1) (26 kDa prosomal protein) (HsBPROS26) (PROS-26) (Macropain beta chain) (Multicatalytic endopeptidase complex beta chain) (Proteasome beta chain) (Proteasome chain 3) (HsN3)	PSMB4 PROS26	Homo sapiens (Human)	264
HPV-31_E5	P31689	DNJA1	0.00958721	0.820963	0.324983	0.476128	ME6.18,ME7.17,ME8.6,ME9.6	DNJA1_HUMAN	reviewed	DnaJ homolog subfamily A member 1 (DnaJ protein homolog 2) (HSDJ) (Heat shock 40 kDa protein 4) (Heat shock protein J2) (HSJ-2) (Human DnaJ protein 2) (hDj-2)	DNAJA1 DNAJ2 HDJ2 HSJ2 HSPF4	Homo sapiens (Human)	397
HPV-31_E6	P62195	PRS8	0.00213217	0.430432	0.498669	0.474656	ME5.18,ME7.18	PRS8_HUMAN	reviewed	26S protease regulatory subunit 8 (26S proteasome AAA-ATPase subunit RPT6) (Proteasome 26S subunit ATPase 5) (Proteasome subunit p45) (Thyroid hormone receptor-interacting protein 1) (TRIP1) (p45/SUG)	PSMC5 SUG1	Homo sapiens (Human)	406
HPV-31_E2	Q9BPZ3	PAIP2	0.000519686	6.21335e-11	0.691523	0.474049	ME7.21	PAIP2_HUMAN	reviewed	Polyadenylate-binding protein-interacting protein 2 (PABP-interacting protein 2) (PAIP-2) (Poly(A)-binding protein-interacting protein 2)	PAIP2 PAIP2A HSPC218	Homo sapiens (Human)	127
HPV-31_E6	O00232	PSD12	0.00052912	0.425728	0.499277	0.473613	ME7.18,ME8.2	PSD12_HUMAN	reviewed	26S proteasome non-ATPase regulatory subunit 12 (26S proteasome regulatory subunit RPN5) (26S proteasome regulatory subunit p55)	PSMD12	Homo sapiens (Human)	456
HPV-31_L2	Q9Y3Z3	SAMH1	0.000156394	0.43037	0.49718	0.473605	ME7.20,ME9.7	SAMH1_HUMAN	reviewed	SAM domain and HD domain-containing protein 1 (EC 3.1.4.-) (Dendritic cell-derived IFNG-induced protein) (DCIP) (Monocyte protein 5) (MOP-5)	SAMHD1 MOP5	Homo sapiens (Human)	626
HPV-31_L1	Q5SSJ5	HP1B3	0.00127802	0.798301	0.331456	0.473524	ME6.20,ME7.22,ME8.10,ME9.12	HP1B3_HUMAN	reviewed	Heterochromatin protein 1-binding protein 3 (Protein HP1-BP74)	HP1BP3	Homo sapiens (Human)	553
HPV-31_E5	P20618	PSB1	0.00230223	0.628237	0.40609	0.472222	ME6.18,ME8.6,ME9.6	PSB1_HUMAN	reviewed	Proteasome subunit beta type-1 (EC 3.4.25.1) (Macropain subunit C5) (Multicatalytic endopeptidase complex subunit C5) (Proteasome component C5) (Proteasome gamma chain)	PSMB1 PSC5	Homo sapiens (Human)	241
HPV-31_E5	P08238	HS90B	0.00419261	0.85059	0.302772	0.470011	ME6.18,ME7.17,ME8.6,ME9.6	HS90B_HUMAN	reviewed	Heat shock protein HSP 90-beta (HSP 90) (Heat shock 84 kDa) (HSP 84) (HSP84)	HSP90AB1 HSP90B HSPC2 HSPCB	Homo sapiens (Human)	724
HPV-31_E2	P62714	PP2AB	0.00256423	0.4947	0.460163	0.468091	ME7.21,ME8.9,ME9.9	PP2AB_HUMAN	reviewed	Serine/threonine-protein phosphatase 2A catalytic subunit beta isoform (PP2A-beta) (EC 3.1.3.16)	PPP2CB	Homo sapiens (Human)	309
HPV-31_L2	P12236	ADT3	0.00662271	0.939453	0.258779	0.467285	ME5.22,ME6.21,ME7.20,ME8.7,ME9.7	ADT3_HUMAN	reviewed	ADP/ATP translocase 3 (ADP,ATP carrier protein 3) (ADP,ATP carrier protein, isoform T2) (ANT 2) (Adenine nucleotide translocator 3) (ANT 3) (Solute carrier family 25 member 6)	SLC25A6 ANT3 CDABP0051	Homo sapiens (Human)	298
HPV-31_L1	Q96GU1	GGEE1	0.000593593	6.21335e-11	0.680843	0.466728	ME6.20	GGEE1_HUMAN	reviewed	G antigen family E member 1 (Cancer/testis antigen 16.1) (CT16.1) (Prostate-associated gene 5 protein) (PAGE-5)	PAGE5 GAGEE1	Homo sapiens (Human)	130
HPV-31_L1	P05455	LA	0.00176651	0.763377	0.337158	0.46666	ME6.20,ME7.22,ME8.10,ME9.12	LA_HUMAN	reviewed	Lupus La protein (La autoantigen) (La ribonucleoprotein) (Sjoegren syndrome type B antigen) (SS-B)	SSB	Homo sapiens (Human)	408
HPV-31_L1	P32969	RL9	0.00480606	0.833242	0.305605	0.466604	ME6.20,ME7.22,ME8.10,ME9.12	RL9_HUMAN	reviewed	60S ribosomal protein L9	RPL9 OK/SW-cl.103; RPL9P7; RPL9P8; RPL9P9	Homo sapiens (Human)	192
HPV-31_E6	O14818	PSA7	0.00417775	0.812336	0.31451	0.466255	ME5.18,ME6.17,ME7.18,ME8.2	PSA7_HUMAN	reviewed	Proteasome subunit alpha type-7 (EC 3.4.25.1) (Proteasome subunit RC6-1) (Proteasome subunit XAPC7)	PSMA7 HSPC	Homo sapiens (Human)	248
HPV-31_E1	P05141	ADT2	0.0105625	0.9159	0.265743	0.464815	ME5.21,ME6.22,ME7.23,ME8.11,ME9.10	ADT2_HUMAN	reviewed	ADP/ATP translocase 2 (ADP,ATP carrier protein 2) (ADP,ATP carrier protein, fibroblast isoform) (Adenine nucleotide translocator 2) (ANT 2) (Solute carrier family 25 member 5)	SLC25A5 ANT2	Homo sapiens (Human)	298
HPV-31_E6	Q13748	TBA3C	0.0135725	0.963199	0.242308	0.463362	ME5.18,ME6.17,ME7.18,ME8.2,ME9.5	TBA3C_HUMAN	reviewed	Tubulin alpha-3C/D chain (Alpha-tubulin 2) (Alpha-tubulin 3C/D) (Tubulin alpha-2 chain)	TUBA3C TUBA2; TUBA3D	Homo sapiens (Human)	450
HPV-31_E2	P49207	RL34	0.00913851	0.921568	0.260462	0.462935	ME5.20,ME6.19,ME7.21,ME8.9,ME9.9	RL34_HUMAN	reviewed	60S ribosomal protein L34	RPL34	Homo sapiens (Human)	117
HPV-31_E8^E2C	Q9H307	PININ	0.000102787	6.21335e-11	0.674274	0.462222	ME7.15	PININ_HUMAN	reviewed	Pinin (140 kDa nuclear and cell adhesion-related phosphoprotein) (Desmosome-associated protein) (Domain-rich serine protein) (DRS protein) (DRSP) (Melanoma metastasis clone A protein) (Nuclear protein SDK3) (SR-like protein)	PNN DRS MEMA	Homo sapiens (Human)	717
HPV-31_E5	O95816	BAG2	0.00990794	0.824084	0.302289	0.461536	ME6.18,ME7.17,ME8.6,ME9.6	BAG2_HUMAN	reviewed	BAG family molecular chaperone regulator 2 (BAG-2) (Bcl-2-associated athanogene 2)	BAG2	Homo sapiens (Human)	211
HPV-31_E6	O75182	SIN3B	5.36138e-05	6.21335e-11	0.672767	0.461189	ME5.18	SIN3B_HUMAN	reviewed	Paired amphipathic helix protein Sin3b (Histone deacetylase complex subunit Sin3b) (Transcriptional corepressor Sin3b)	SIN3B KIAA0700	Homo sapiens (Human)	1162
HPV-31_E1^E4	Q9Y5S9	RBM8A	0.000933405	0.398926	0.493174	0.461162	ME7.16,ME9.3	RBM8A_HUMAN	reviewed	RNA-binding protein 8A (Binder of OVCA1-1) (BOV-1) (RNA-binding motif protein 8A) (RNA-binding protein Y14) (Ribonucleoprotein RBM8A)	RBM8A RBM8 HSPC114 MDS014	Homo sapiens (Human)	174
HPV-31_L1	O43143	DHX15	0.000613815	0.662408	0.373316	0.460288	ME7.22,ME8.10,ME9.12	DHX15_HUMAN	reviewed	Putative pre-mRNA-splicing factor ATP-dependent RNA helicase DHX15 (EC 3.6.4.13) (ATP-dependent RNA helicase #46) (DEAH box protein 15)	DHX15 DBP1 DDX15	Homo sapiens (Human)	795
HPV-31_E1	P09543	CN37	0.000439894	0.403149	0.49	0.460286	ME7.23,ME9.10	CN37_HUMAN	reviewed	2',3'-cyclic-nucleotide 3'-phosphodiesterase (CNP) (CNPase) (EC 3.1.4.37)	CNP	Homo sapiens (Human)	421
HPV-31_E1	P11216	PYGB	0.000128162	6.21335e-11	0.671266	0.46016	ME8.11	PYGB_HUMAN	reviewed	Glycogen phosphorylase, brain form (EC 2.4.1.1)	PYGB	Homo sapiens (Human)	843
HPV-31_E8^E2C	P09001	RM03	0.000261336	0.421689	0.479766	0.45899	ME7.15,ME9.2	RM03_HUMAN	reviewed	39S ribosomal protein L3, mitochondrial (L3mt) (MRP-L3)	MRPL3 MRL3 RPML3	Homo sapiens (Human)	348
HPV-31_E6	Q14008	CKAP5	3.6309e-05	6.21335e-11	0.669095	0.458671	ME9.5	CKAP5_HUMAN	reviewed	Cytoskeleton-associated protein 5 (Colonic and hepatic tumor overexpressed gene protein) (Ch-TOG)	CKAP5 KIAA0097	Homo sapiens (Human)	2032
HPV-31_E5	P07900	HS90A	0.00364953	0.927056	0.250512	0.457775	ME5.14,ME6.18,ME7.17,ME8.6,ME9.6	HS90A_HUMAN	reviewed	Heat shock protein HSP 90-alpha (Heat shock 86 kDa) (HSP 86) (HSP86) (Renal carcinoma antigen NY-REN-38)	HSP90AA1 HSP90A HSPC1 HSPCA	Homo sapiens (Human)	732
HPV-31_E1^E4	Q9H4B7	TBB1	0.00217199	0.838208	0.28933	0.456964	ME5.17,ME6.16,ME7.16,ME8.5	TBB1_HUMAN	reviewed	Tubulin beta-1 chain	TUBB1	Homo sapiens (Human)	451
HPV-31_L1	P17844	DDX5	0.0052031	0.809503	0.301575	0.45652	ME6.20,ME7.22,ME8.10,ME9.12	DDX5_HUMAN	reviewed	Probable ATP-dependent RNA helicase DDX5 (EC 3.6.4.13) (DEAD box protein 5) (RNA helicase p68)	DDX5 G17P1 HELR HLR1	Homo sapiens (Human)	614
HPV-31_E1^E4	Q9BUF5	TBB6	0.00786129	0.97062	0.228218	0.455958	ME5.17,ME6.16,ME7.16,ME8.5,ME9.3	TBB6_HUMAN	reviewed	Tubulin beta-6 chain	TUBB6	Homo sapiens (Human)	446
HPV-31_E1^E4	P21333	FLNA	5.78009e-05	6.21335e-11	0.664559	0.455562	ME7.16	FLNA_HUMAN	reviewed	Filamin-A (FLN-A) (Actin-binding protein 280) (ABP-280) (Alpha-filamin) (Endothelial actin-binding protein) (Filamin-1) (Non-muscle filamin)	FLNA FLN FLN1	Homo sapiens (Human)	2647
HPV-31_E2	Q96RG2	PASK	0.000108818	6.21335e-11	0.664099	0.455247	ME7.21	PASK_HUMAN	reviewed	PAS domain-containing serine/threonine-protein kinase (PAS-kinase) (PASKIN) (hPASK) (EC 2.7.11.1)	PASK KIAA0135	Homo sapiens (Human)	1323
HPV-31_E6	P78527	PRKDC	0.000643873	0.666615	0.363656	0.454964	ME5.18,ME6.17,ME7.18	PRKDC_HUMAN	reviewed	DNA-dependent protein kinase catalytic subunit (DNA-PK catalytic subunit) (DNA-PKcs) (EC 2.7.11.1) (DNPK1) (p460)	PRKDC HYRC HYRC1	Homo sapiens (Human)	4128
HPV-31_L1	Q8IWS0	PHF6	0.00022101	0.416364	0.475406	0.454358	ME7.22,ME9.12	PHF6_HUMAN	reviewed	PHD finger protein 6 (PHD-like zinc finger protein)	PHF6 KIAA1823	Homo sapiens (Human)	365
HPV-31_L1	Q12905	ILF2	0.00354372	0.849426	0.278599	0.453077	ME6.20,ME7.22,ME8.10,ME9.12	ILF2_HUMAN	reviewed	Interleukin enhancer-binding factor 2 (Nuclear factor of activated T-cells 45 kDa)	ILF2 NF45 PRO3063	Homo sapiens (Human)	390
HPV-31_E6	P51665	PSD7	0.000212789	6.21335e-11	0.660234	0.452598	ME7.18	PSD7_HUMAN	reviewed	26S proteasome non-ATPase regulatory subunit 7 (26S proteasome regulatory subunit RPN8) (26S proteasome regulatory subunit S12) (Mov34 protein homolog) (Proteasome subunit p40)	PSMD7 MOV34L	Homo sapiens (Human)	324
HPV-31_E1	Q15029	U5S1	6.73482e-05	6.21335e-11	0.659666	0.452208	ME7.23	U5S1_HUMAN	reviewed	116 kDa U5 small nuclear ribonucleoprotein component (Elongation factor Tu GTP-binding domain-containing protein 2) (SNU114 homolog) (hSNU114) (U5 snRNP-specific protein, 116 kDa) (U5-116 kDa)	EFTUD2 KIAA0031 SNRP116	Homo sapiens (Human)	972
HPV-31_L1	P62910	RL32	0.00305021	0.833966	0.284184	0.452132	ME6.20,ME7.22,ME8.10,ME9.12	RL32_HUMAN	reviewed	60S ribosomal protein L32	RPL32 PP9932	Homo sapiens (Human)	135
HPV-31_E1	Q8N726	CD2A2	0.00127406	0.612888	0.382857	0.451554	ME7.23,ME8.11,ME9.10	CD2A2_HUMAN	reviewed	Cyclin-dependent kinase inhibitor 2A, isoform 4 (p14ARF) (p19ARF)	CDKN2A CDKN2 MLM	Homo sapiens (Human)	132
HPV-31_E7	P10599	THIO	0.00289279	0.670968	0.355606	0.450802	ME6.23,ME7.19,ME8.8	THIO_HUMAN	reviewed	Thioredoxin (Trx) (ATL-derived factor) (ADF) (Surface-associated sulphydryl protein) (SASP)	TXN TRDX TRX TRX1	Homo sapiens (Human)	105
HPV-31_E8^E2C	P61254	RL26	0.00880086	0.932627	0.237752	0.450777	ME5.15,ME6.15,ME7.15,ME8.4,ME9.2	RL26_HUMAN	reviewed	60S ribosomal protein L26	RPL26	Homo sapiens (Human)	145
HPV-31_E1^E4	Q6PEY2	TBA3E	0.0087365	0.973837	0.218721	0.450445	ME5.17,ME6.16,ME7.16,ME8.5,ME9.3	TBA3E_HUMAN	reviewed	Tubulin alpha-3E chain (Alpha-tubulin 3E)	TUBA3E	Homo sapiens (Human)	450
HPV-31_E7	P53007	TXTP	0.000368684	0.366497	0.491053	0.449699	ME6.23,ME7.19	TXTP_HUMAN	reviewed	Tricarboxylate transport protein, mitochondrial (Citrate transport protein) (CTP) (Solute carrier family 25 member 1) (Tricarboxylate carrier protein)	SLC25A1 SLC20A3	Homo sapiens (Human)	311
HPV-31_L1	Q96SB4	SRPK1	7.45176e-05	6.21335e-11	0.655339	0.449242	ME9.12	SRPK1_HUMAN	reviewed	SRSF protein kinase 1 (EC 2.7.11.1) (SFRS protein kinase 1) (Serine/arginine-rich protein-specific kinase 1) (SR-protein-specific kinase 1)	SRPK1	Homo sapiens (Human)	655
HPV-31_E1^E4	Q71U36	TBA1A	0.0170932	0.967688	0.219183	0.448915	ME5.17,ME6.16,ME7.16,ME8.5,ME9.3	TBA1A_HUMAN	reviewed	Tubulin alpha-1A chain (Alpha-tubulin 3) (Tubulin B-alpha-1) (Tubulin alpha-3 chain)	TUBA1A TUBA3	Homo sapiens (Human)	451
HPV-31_E5	P62195	PRS8	0.00151596	0.666655	0.354551	0.448741	ME6.18,ME7.17,ME9.6	PRS8_HUMAN	reviewed	26S protease regulatory subunit 8 (26S proteasome AAA-ATPase subunit RPT6) (Proteasome 26S subunit ATPase 5) (Proteasome subunit p45) (Thyroid hormone receptor-interacting protein 1) (TRIP1) (p45/SUG)	PSMC5 SUG1	Homo sapiens (Human)	406
HPV-31_E7	Q6VN20	RBP10	0.000103201	6.21335e-11	0.65324	0.447803	ME7.19	RBP10_HUMAN	reviewed	Ran-binding protein 10 (RanBP10)	RANBP10 KIAA1464	Homo sapiens (Human)	620
HPV-31_E8^E2C	P10301	RRAS	0.00241455	0.812283	0.287296	0.447572	ME5.15,ME6.15,ME8.4,ME9.2	RRAS_HUMAN	reviewed	Ras-related protein R-Ras (p23)	RRAS	Homo sapiens (Human)	218
HPV-31_E6	Q6PEY2	TBA3E	0.0095794	0.965444	0.218177	0.447488	ME5.18,ME6.17,ME7.18,ME8.2,ME9.5	TBA3E_HUMAN	reviewed	Tubulin alpha-3E chain (Alpha-tubulin 3E)	TUBA3E	Homo sapiens (Human)	450
HPV-31_E8^E2C	P62266	RS23	0.00851791	0.953423	0.223562	0.447464	ME5.15,ME6.15,ME7.15,ME8.4,ME9.2	RS23_HUMAN	reviewed	40S ribosomal protein S23	RPS23	Homo sapiens (Human)	143
HPV-31_L2	O60884	DNJA2	0.00302389	0.951677	0.223266	0.44669	ME5.22,ME6.21,ME7.20,ME8.7,ME9.7	DNJA2_HUMAN	reviewed	DnaJ homolog subfamily A member 2 (Cell cycle progression restoration gene 3 protein) (Dnj3) (Dj3) (HIRA-interacting protein 4) (Renal carcinoma antigen NY-REN-14)	DNAJA2 CPR3 HIRIP4	Homo sapiens (Human)	412
HPV-31_E7	P23528	COF1	0.00688241	0.665914	0.349557	0.44512	ME6.23,ME7.19,ME9.8	COF1_HUMAN	reviewed	Cofilin-1 (18 kDa phosphoprotein) (p18) (Cofilin, non-muscle isoform)	CFL1 CFL	Homo sapiens (Human)	166
HPV-31_E6	P49720	PSB3	0.00124222	0.660059	0.350197	0.443719	ME5.18,ME6.17,ME9.5	PSB3_HUMAN	reviewed	Proteasome subunit beta type-3 (EC 3.4.25.1) (Proteasome chain 13) (Proteasome component C10-II) (Proteasome theta chain)	PSMB3	Homo sapiens (Human)	205
HPV-31_E5	Q9BR76	COR1B	0.000298267	0.349548	0.488517	0.442731	ME7.17,ME8.6	COR1B_HUMAN	reviewed	Coronin-1B (Coronin-2)	CORO1B	Homo sapiens (Human)	489
HPV-31_E1^E4	Q13509	TBB3	0.0123591	0.969773	0.208259	0.442041	ME5.17,ME6.16,ME7.16,ME8.5,ME9.3	TBB3_HUMAN	reviewed	Tubulin beta-3 chain (Tubulin beta-4 chain) (Tubulin beta-III)	TUBB3 TUBB4	Homo sapiens (Human)	450
HPV-31_E5	P55209	NP1L1	0.000804666	0.660087	0.346778	0.441381	ME6.18,ME7.17,ME9.6	NP1L1_HUMAN	reviewed	Nucleosome assembly protein 1-like 1 (NAP-1-related protein) (hNRP)	NAP1L1 NRP	Homo sapiens (Human)	391
HPV-31_E1	P20248	CCNA2	0.00116156	0.794973	0.285023	0.440666	ME6.22,ME7.23,ME8.11,ME9.10	CCNA2_HUMAN	reviewed	Cyclin-A2 (Cyclin-A)	CCNA2 CCN1 CCNA	Homo sapiens (Human)	432
HPV-31_E6	P25787	PSA2	0.00180327	0.763147	0.298833	0.440317	ME5.18,ME6.17,ME7.18,ME9.5	PSA2_HUMAN	reviewed	Proteasome subunit alpha type-2 (EC 3.4.25.1) (Macropain subunit C3) (Multicatalytic endopeptidase complex subunit C3) (Proteasome component C3)	PSMA2 HC3 PSC3	Homo sapiens (Human)	234
HPV-31_L2	Q9UMS4	PRP19	0.000499689	0.429677	0.448314	0.439895	ME6.21,ME7.20	PRP19_HUMAN	reviewed	Pre-mRNA-processing factor 19 (Nuclear matrix protein 200) (PRP19/PSO4 homolog) (hPso4) (Senescence evasion factor)	PRPF19 NMP200 PRP19 SNEV	Homo sapiens (Human)	504
HPV-31_E1^E4	Q13185	CBX3	0.00177916	0.429722	0.4466	0.438742	ME6.16,ME8.5	CBX3_HUMAN	reviewed	Chromobox protein homolog 3 (HECH) (Heterochromatin protein 1 homolog gamma) (HP1 gamma) (Modifier 2 protein)	CBX3	Homo sapiens (Human)	183
HPV-31_E6	Q9NY65	TBA8	0.00883224	0.962016	0.206698	0.438557	ME5.18,ME6.17,ME7.18,ME8.2,ME9.5	TBA8_HUMAN	reviewed	Tubulin alpha-8 chain (Alpha-tubulin 8) (Tubulin alpha chain-like 2)	TUBA8 TUBAL2	Homo sapiens (Human)	449
HPV-31_E5	P25705	ATPA	0.00299859	0.796528	0.281075	0.43845	ME5.14,ME6.18,ME7.17,ME9.6	ATPA_HUMAN	reviewed	ATP synthase subunit alpha, mitochondrial	ATP5A1 ATP5A ATP5AL2 ATPM	Homo sapiens (Human)	553
HPV-31_E7	O75607	NPM3	0.000538527	0.396007	0.460855	0.438104	ME7.19,ME9.8	NPM3_HUMAN	reviewed	Nucleoplasmin-3	NPM3	Homo sapiens (Human)	178
HPV-31_E6	Q71U36	TBA1A	0.0171534	0.969218	0.202479	0.437936	ME5.18,ME6.17,ME7.18,ME8.2,ME9.5	TBA1A_HUMAN	reviewed	Tubulin alpha-1A chain (Alpha-tubulin 3) (Tubulin B-alpha-1) (Tubulin alpha-3 chain)	TUBA1A TUBA3	Homo sapiens (Human)	451
HPV-31_E7	Q9NVI7	ATD3A	0.000715419	0.851977	0.25526	0.437848	ME6.23,ME7.19,ME8.8,ME9.8	ATD3A_HUMAN	reviewed	ATPase family AAA domain-containing protein 3A	ATAD3A	Homo sapiens (Human)	634
HPV-31_L1	P62891	RL39	0.00380908	0.661596	0.340419	0.437506	ME7.22,ME8.10,ME9.12	RL39_HUMAN	reviewed	60S ribosomal protein L39	RPL39	Homo sapiens (Human)	51
HPV-31_E7	P30153	2AAA	0.000106334	6.21335e-11	0.638189	0.437485	ME7.19	2AAA_HUMAN	reviewed	Serine/threonine-protein phosphatase 2A 65 kDa regulatory subunit A alpha isoform (Medium tumor antigen-associated 61 kDa protein) (PP2A subunit A isoform PR65-alpha) (PP2A subunit A isoform R1-alpha)	PPP2R1A	Homo sapiens (Human)	589
HPV-31_E5	P49458	SRP09	0.00737025	0.813385	0.2717	0.437251	ME5.14,ME6.18,ME8.6,ME9.6	SRP09_HUMAN	reviewed	Signal recognition particle 9 kDa protein (SRP9)	SRP9	Homo sapiens (Human)	86
HPV-31_E8^E2C	P83731	RL24	0.0124257	0.956002	0.205551	0.435937	ME5.15,ME6.15,ME7.15,ME8.4,ME9.2	RL24_HUMAN	reviewed	60S ribosomal protein L24 (60S ribosomal protein L30)	RPL24	Homo sapiens (Human)	157
HPV-31_E5	P63220	RS21	0.0095209	0.901382	0.229656	0.435591	ME5.14,ME6.18,ME7.17,ME8.6,ME9.6	RS21_HUMAN	reviewed	40S ribosomal protein S21	RPS21	Homo sapiens (Human)	83
HPV-31_L2	O95816	BAG2	0.00665057	0.960819	0.202907	0.435576	ME5.22,ME6.21,ME7.20,ME8.7,ME9.7	BAG2_HUMAN	reviewed	BAG family molecular chaperone regulator 2 (BAG-2) (Bcl-2-associated athanogene 2)	BAG2	Homo sapiens (Human)	211
HPV-31_E5	Q15366	PCBP2	0.00294989	0.854768	0.249352	0.434673	ME6.18,ME7.17,ME8.6,ME9.6	PCBP2_HUMAN	reviewed	Poly(rC)-binding protein 2 (Alpha-CP2) (Heterogeneous nuclear ribonucleoprotein E2) (hnRNP E2)	PCBP2	Homo sapiens (Human)	365
HPV-31_E8^E2C	P62854	RS26	0.0113123	0.922559	0.218527	0.434507	ME5.15,ME6.15,ME7.15,ME8.4,ME9.2	RS26_HUMAN	reviewed	40S ribosomal protein S26	RPS26	Homo sapiens (Human)	115
HPV-31_E7	Q9BZE1	RM37	0.000359168	0.311666	0.493332	0.434344	ME7.19,ME9.8	RM37_HUMAN	reviewed	39S ribosomal protein L37, mitochondrial (L37mt) (MRP-L37) (39S ribosomal protein L2, mitochondrial) (L2mt) (MRP-L2)	MRPL37 MRPL2 RPML2 HSPC235	Homo sapiens (Human)	423
HPV-31_E2	Q96I76	GPTC3	0.000355827	6.21335e-11	0.633445	0.434235	ME8.9	GPTC3_HUMAN	reviewed	G patch domain-containing protein 3	GPATCH3 GPATC3	Homo sapiens (Human)	525
HPV-31_E5	Q96EP5	DAZP1	0.00917794	0.942524	0.207641	0.433191	ME5.14,ME6.18,ME7.17,ME8.6,ME9.6	DAZP1_HUMAN	reviewed	DAZ-associated protein 1 (Deleted in azoospermia-associated protein 1)	DAZAP1	Homo sapiens (Human)	407
HPV-31_E8^E2C	P84098	RL19	0.00561734	0.951709	0.203018	0.432835	ME5.15,ME6.15,ME7.15,ME8.4,ME9.2	RL19_HUMAN	reviewed	60S ribosomal protein L19	RPL19	Homo sapiens (Human)	196
HPV-31_E1^E4	Q9BQE3	TBA1C	0.0156966	0.968903	0.194402	0.432293	ME5.17,ME6.16,ME7.16,ME8.5,ME9.3	TBA1C_HUMAN	reviewed	Tubulin alpha-1C chain (Alpha-tubulin 6) (Tubulin alpha-6 chain)	TUBA1C TUBA6	Homo sapiens (Human)	449
HPV-31_L2	Q9H4B7	TBB1	0.00217755	0.853627	0.246332	0.432246	ME5.22,ME6.21,ME7.20,ME8.7	TBB1_HUMAN	reviewed	Tubulin beta-1 chain	TUBB1	Homo sapiens (Human)	451
HPV-31_E5	P35998	PRS7	0.00108806	0.429105	0.43697	0.431946	ME7.17,ME9.6	PRS7_HUMAN	reviewed	26S protease regulatory subunit 7 (26S proteasome AAA-ATPase subunit RPT1) (Proteasome 26S subunit ATPase 2) (Protein MSS1)	PSMC2 MSS1	Homo sapiens (Human)	433
HPV-31_L2	Q14257	RCN2	0.00238445	0.816543	0.260312	0.430389	ME5.22,ME6.21,ME7.20,ME9.7	RCN2_HUMAN	reviewed	Reticulocalbin-2 (Calcium-binding protein ERC-55) (E6-binding protein) (E6BP)	RCN2 ERC55	Homo sapiens (Human)	317
HPV-31_E1^E4	Q9BYD1	RM13	0.000196154	6.21335e-11	0.627546	0.430191	ME7.16	RM13_HUMAN	reviewed	39S ribosomal protein L13, mitochondrial (L13mt) (MRP-L13)	MRPL13	Homo sapiens (Human)	178
HPV-31_E1^E4	Q13885	TBB2A	0.0155201	0.982378	0.183758	0.429154	ME5.17,ME6.16,ME7.16,ME8.5,ME9.3	TBB2A_HUMAN	reviewed	Tubulin beta-2A chain	TUBB2A TUBB2	Homo sapiens (Human)	445
HPV-31_E1^E4	Q9BVA1	TBB2B	0.0154859	0.982378	0.183538	0.429003	ME5.17,ME6.16,ME7.16,ME8.5,ME9.3	TBB2B_HUMAN	reviewed	Tubulin beta-2B chain	TUBB2B	Homo sapiens (Human)	445
HPV-31_L2	Q9Y3U8	RL36	0.00387006	0.975096	0.184889	0.427613	ME5.22,ME6.21,ME7.20,ME8.7,ME9.7	RL36_HUMAN	reviewed	60S ribosomal protein L36	RPL36	Homo sapiens (Human)	105
HPV-31_L1	P0CB38	PAB4L	0.00028412	0.380471	0.451731	0.427054	ME6.20,ME7.22	PAB4L_HUMAN	reviewed	Polyadenylate-binding protein 4-like (PABP-4-like) (Poly(A)-binding protein 4-like)	PABPC4L	Homo sapiens (Human)	370
HPV-31_L1	P12956	XRCC6	0.000953863	0.638441	0.335011	0.426637	ME7.22,ME8.10,ME9.12	XRCC6_HUMAN	reviewed	X-ray repair cross-complementing protein 6 (EC 3.6.4.-) (EC 4.2.99.-) (5'-deoxyribose-5-phosphate lyase Ku70) (5'-dRP lyase Ku70) (70 kDa subunit of Ku antigen) (ATP-dependent DNA helicase 2 subunit 1) (ATP-dependent DNA helicase II 70 kDa subunit) (CTC box-binding factor 75 kDa subunit) (CTC75) (CTCBF) (DNA repair protein XRCC6) (Lupus Ku autoantigen protein p70) (Ku70) (Thyroid-lupus autoantige…	XRCC6 G22P1	Homo sapiens (Human)	609
HPV-31_E1	P12236	ADT3	0.00619914	0.800412	0.261621	0.426332	ME5.21,ME6.22,ME7.23,ME8.11	ADT3_HUMAN	reviewed	ADP/ATP translocase 3 (ADP,ATP carrier protein 3) (ADP,ATP carrier protein, isoform T2) (ANT 2) (Adenine nucleotide translocator 3) (ANT 3) (Solute carrier family 25 member 6)	SLC25A6 ANT3 CDABP0051	Homo sapiens (Human)	298
HPV-31_E1^E4	Q96PK6	RBM14	0.000125844	6.21335e-11	0.621595	0.426111	ME8.5	RBM14_HUMAN	reviewed	RNA-binding protein 14 (Paraspeckle protein 2) (PSP2) (RNA-binding motif protein 14) (RRM-containing coactivator activator/modulator) (Synaptotagmin-interacting protein) (SYT-interacting protein)	RBM14 SIP	Homo sapiens (Human)	669
HPV-31_L2	P31689	DNJA1	0.00570258	0.950819	0.193303	0.425902	ME5.22,ME6.21,ME7.20,ME8.7,ME9.7	DNJA1_HUMAN	reviewed	DnaJ homolog subfamily A member 1 (DnaJ protein homolog 2) (HSDJ) (Heat shock 40 kDa protein 4) (Heat shock protein J2) (HSJ-2) (Human DnaJ protein 2) (hDj-2)	DNAJA1 DNAJ2 HDJ2 HSJ2 HSPF4	Homo sapiens (Human)	397
HPV-31_L1	P27635	RL10	0.00834615	0.96111	0.18863	0.425888	ME5.23,ME6.20,ME7.22,ME8.10,ME9.12	RL10_HUMAN	reviewed	60S ribosomal protein L10 (Laminin receptor homolog) (Protein QM) (Tumor suppressor QM)	RPL10 DXS648E QM	Homo sapiens (Human)	214
HPV-31_L2	P16402	H13	0.00924358	0.96769	0.182384	0.423642	ME5.22,ME6.21,ME7.20,ME8.7,ME9.7	H13_HUMAN	reviewed	Histone H1.3 (Histone H1c) (Histone H1s-2)	HIST1H1D H1F3	Homo sapiens (Human)	221
HPV-31_E2	P05388	RLA0	0.0057914	0.982635	0.175033	0.423194	ME5.20,ME6.19,ME7.21,ME8.9,ME9.9	RLA0_HUMAN	reviewed	60S acidic ribosomal protein P0 (60S ribosomal protein L10E)	RPLP0	Homo sapiens (Human)	317
HPV-31_E8^E2C	P07305	H10	0.00179547	0.47658	0.402628	0.423056	ME7.15,ME8.4,ME9.2	H10_HUMAN	reviewed	Histone H1.0 (Histone H1') (Histone H1(0))	H1F0 H1FV	Homo sapiens (Human)	194
HPV-31_E6	Q13509	TBB3	0.0109084	0.984381	0.173907	0.422991	ME5.18,ME6.17,ME7.18,ME8.2,ME9.5	TBB3_HUMAN	reviewed	Tubulin beta-3 chain (Tubulin beta-4 chain) (Tubulin beta-III)	TUBB3 TUBB4	Homo sapiens (Human)	450
HPV-31_L2	Q00325	MPCP	0.00291956	0.928385	0.198388	0.422449	ME5.22,ME6.21,ME7.20,ME8.7,ME9.7	MPCP_HUMAN	reviewed	Phosphate carrier protein, mitochondrial (Phosphate transport protein) (PTP) (Solute carrier family 25 member 3)	SLC25A3 PHC OK/SW-cl.48	Homo sapiens (Human)	362
HPV-31_L2	Q8N726	CD2A2	0.00119151	0.573399	0.358051	0.422365	ME6.21,ME7.20,ME9.7	CD2A2_HUMAN	reviewed	Cyclin-dependent kinase inhibitor 2A, isoform 4 (p14ARF) (p19ARF)	CDKN2A CDKN2 MLM	Homo sapiens (Human)	132
HPV-31_E1	P62249	RS16	0.0150725	0.988374	0.171104	0.422326	ME5.21,ME6.22,ME7.23,ME8.11,ME9.10	RS16_HUMAN	reviewed	40S ribosomal protein S16	RPS16	Homo sapiens (Human)	146
HPV-31_E2	P09234	RU1C	0.000608041	0.408712	0.431147	0.421659	ME7.21,ME9.9	RU1C_HUMAN	reviewed	U1 small nuclear ribonucleoprotein C (U1 snRNP C) (U1-C) (U1C)	SNRPC	Homo sapiens (Human)	159
HPV-31_E6	Q9BQE3	TBA1C	0.0155047	0.969044	0.178632	0.421526	ME5.18,ME6.17,ME7.18,ME8.2,ME9.5	TBA1C_HUMAN	reviewed	Tubulin alpha-1C chain (Alpha-tubulin 6) (Tubulin alpha-6 chain)	TUBA1C TUBA6	Homo sapiens (Human)	449
HPV-31_E1^E4	P04350	TBB4A	0.0160089	0.975813	0.174044	0.420472	ME5.17,ME6.16,ME7.16,ME8.5,ME9.3	TBB4A_HUMAN	reviewed	Tubulin beta-4A chain (Tubulin 5 beta) (Tubulin beta-4 chain)	TUBB4A TUBB4 TUBB5	Homo sapiens (Human)	444
HPV-31_E7	Q9BYD3	RM04	0.000229419	0.425168	0.421352	0.42002	ME6.23,ME7.19	RM04_HUMAN	reviewed	39S ribosomal protein L4, mitochondrial (L4mt) (MRP-L4)	MRPL4 CDABP0091 CGI-28	Homo sapiens (Human)	311
HPV-31_L2	Q9UBS4	DJB11	0.000143771	6.21335e-11	0.612501	0.419876	ME7.20	DJB11_HUMAN	reviewed	DnaJ homolog subfamily B member 11 (APOBEC1-binding protein 2) (ABBP-2) (DnaJ protein homolog 9) (ER-associated DNAJ) (ER-associated Hsp40 co-chaperone) (ER-associated dnaJ protein 3) (ERdj3) (ERj3p) (HEDJ) (Human DnaJ protein 9) (hDj-9) (PWP1-interacting protein 4)	DNAJB11 EDJ ERJ3 HDJ9 PSEC0121 UNQ537/PRO1080	Homo sapiens (Human)	358
HPV-31_E2	P62753	RS6	0.00958409	0.977874	0.169389	0.417878	ME5.20,ME6.19,ME7.21,ME8.9,ME9.9	RS6_HUMAN	reviewed	40S ribosomal protein S6 (Phosphoprotein NP33)	RPS6 OK/SW-cl.2	Homo sapiens (Human)	249
HPV-31_E2	Q13310	PABP4	0.00813903	0.996439	0.159439	0.416777	ME5.20,ME6.19,ME7.21,ME8.9,ME9.9	PABP4_HUMAN	reviewed	Polyadenylate-binding protein 4 (PABP-4) (Poly(A)-binding protein 4) (Activated-platelet protein 1) (APP-1) (Inducible poly(A)-binding protein) (iPABP)	PABPC4 APP1 PABP4	Homo sapiens (Human)	644
HPV-31_E5	Q15046	SYK	0.000239552	0.430666	0.413793	0.416534	ME7.17,ME9.6	SYK_HUMAN	reviewed	Lysine--tRNA ligase (EC 6.1.1.6) (Lysyl-tRNA synthetase) (LysRS)	KARS KIAA0070	Homo sapiens (Human)	597
HPV-31_E7	P10809	CH60	0.00328451	0.838603	0.229808	0.416289	ME6.23,ME7.19,ME8.8,ME9.8	CH60_HUMAN	reviewed	60 kDa heat shock protein, mitochondrial (60 kDa chaperonin) (Chaperonin 60) (CPN60) (Heat shock protein 60) (HSP-60) (Hsp60) (HuCHA60) (Mitochondrial matrix protein P1) (P60 lymphocyte protein)	HSPD1 HSP60	Homo sapiens (Human)	573
HPV-31_E7	O00148	DX39A	0.000163062	0.425168	0.415145	0.415764	ME6.23,ME7.19	DX39A_HUMAN	reviewed	ATP-dependent RNA helicase DDX39A (EC 3.6.4.13) (DEAD box protein 39) (Nuclear RNA helicase URH49)	DDX39A DDX39	Homo sapiens (Human)	427
HPV-31_E1	Q00325	MPCP	0.00219396	0.972892	0.168351	0.415585	ME5.21,ME6.22,ME7.23,ME8.11,ME9.10	MPCP_HUMAN	reviewed	Phosphate carrier protein, mitochondrial (Phosphate transport protein) (PTP) (Solute carrier family 25 member 3)	SLC25A3 PHC OK/SW-cl.48	Homo sapiens (Human)	362
HPV-31_E1^E4	P14866	HNRPL	0.00257447	0.915182	0.192518	0.41435	ME5.17,ME6.16,ME7.16,ME8.5,ME9.3	HNRPL_HUMAN	reviewed	Heterogeneous nuclear ribonucleoprotein L (hnRNP L)	HNRNPL HNRPL P/OKcl.14	Homo sapiens (Human)	589
HPV-31_E6	Q13885	TBB2A	0.0143852	0.980186	0.161744	0.41338	ME5.18,ME6.17,ME7.18,ME8.2,ME9.5	TBB2A_HUMAN	reviewed	Tubulin beta-2A chain	TUBB2A TUBB2	Homo sapiens (Human)	445
HPV-31_E8^E2C	P62753	RS6	0.00919401	0.97602	0.163622	0.413351	ME5.15,ME6.15,ME7.15,ME8.4,ME9.2	RS6_HUMAN	reviewed	40S ribosomal protein S6 (Phosphoprotein NP33)	RPS6 OK/SW-cl.2	Homo sapiens (Human)	249
HPV-31_E6	Q9BVA1	TBB2B	0.0143535	0.980186	0.161694	0.413345	ME5.18,ME6.17,ME7.18,ME8.2,ME9.5	TBB2B_HUMAN	reviewed	Tubulin beta-2B chain	TUBB2B	Homo sapiens (Human)	445
HPV-31_E1^E4	P35637	FUS	0.00129116	0.728549	0.274831	0.413186	ME6.16,ME7.16,ME8.5,ME9.3	FUS_HUMAN	reviewed	RNA-binding protein FUS (75 kDa DNA-pairing protein) (Oncogene FUS) (Oncogene TLS) (POMp75) (Translocated in liposarcoma protein)	FUS TLS	Homo sapiens (Human)	526
HPV-31_E8^E2C	P62899	RL31	0.0132314	0.938163	0.180148	0.413023	ME5.15,ME6.15,ME7.15,ME8.4,ME9.2	RL31_HUMAN	reviewed	60S ribosomal protein L31	RPL31	Homo sapiens (Human)	125
HPV-31_E7	Q93009	UBP7	0.000257781	0.386963	0.428121	0.412873	ME6.23,ME7.19	UBP7_HUMAN	reviewed	Ubiquitin carboxyl-terminal hydrolase 7 (EC 3.4.19.12) (Deubiquitinating enzyme 7) (Herpesvirus-associated ubiquitin-specific protease) (Ubiquitin thioesterase 7) (Ubiquitin-specific-processing protease 7)	USP7 HAUSP	Homo sapiens (Human)	1102
HPV-31_L2	P04350	TBB4A	0.0160093	0.990938	0.156137	0.412863	ME5.22,ME6.21,ME7.20,ME8.7,ME9.7	TBB4A_HUMAN	reviewed	Tubulin beta-4A chain (Tubulin 5 beta) (Tubulin beta-4 chain)	TUBB4A TUBB4 TUBB5	Homo sapiens (Human)	444
HPV-31_E1^E4	P12004	PCNA	0.00172716	0.430572	0.40762	0.412283	ME7.16,ME9.3	PCNA_HUMAN	reviewed	Proliferating cell nuclear antigen (PCNA) (Cyclin)	PCNA	Homo sapiens (Human)	261
HPV-31_L2	P23396	RS3	0.00982965	0.997803	0.151852	0.412007	ME5.22,ME6.21,ME7.20,ME8.7,ME9.7	RS3_HUMAN	reviewed	40S ribosomal protein S3	RPS3 OK/SW-cl.26	Homo sapiens (Human)	243
HPV-31_E1^E4	P68371	TBB4B	0.020123	0.974179	0.162111	0.411812	ME5.17,ME6.16,ME7.16,ME8.5,ME9.3	TBB4B_HUMAN	reviewed	Tubulin beta-4B chain (Tubulin beta-2 chain) (Tubulin beta-2C chain)	TUBB4B TUBB2C	Homo sapiens (Human)	445
HPV-31_E1	P62829	RL23	0.0197602	0.924149	0.184409	0.41166	ME5.21,ME6.22,ME7.23,ME8.11,ME9.10	RL23_HUMAN	reviewed	60S ribosomal protein L23 (60S ribosomal protein L17)	RPL23	Homo sapiens (Human)	140
HPV-31_E8^E2C	O15355	PPM1G	9.97145e-05	6.21335e-11	0.600105	0.411379	ME9.2	PPM1G_HUMAN	reviewed	Protein phosphatase 1G (EC 3.1.3.16) (Protein phosphatase 1C) (Protein phosphatase 2C isoform gamma) (PP2C-gamma) (Protein phosphatase magnesium-dependent 1 gamma)	PPM1G PPM1C	Homo sapiens (Human)	546
HPV-31_E2	P15880	RS2	0.00937705	0.969972	0.163401	0.411334	ME5.20,ME6.19,ME7.21,ME8.9,ME9.9	RS2_HUMAN	reviewed	40S ribosomal protein S2 (40S ribosomal protein S4) (Protein LLRep3)	RPS2 RPS4	Homo sapiens (Human)	293
HPV-31_L1	Q9H1H9	KI13A	4.50672e-05	0.416364	0.412392	0.41116	ME7.22,ME9.12	KI13A_HUMAN	reviewed	Kinesin-like protein KIF13A (Kinesin-like protein RBKIN)	KIF13A RBKIN	Homo sapiens (Human)	1805
HPV-31_E8^E2C	P16401	H15	0.00568007	0.951597	0.171346	0.411089	ME5.15,ME6.15,ME7.15,ME8.4,ME9.2	H15_HUMAN	reviewed	Histone H1.5 (Histone H1a) (Histone H1b) (Histone H1s-3)	HIST1H1B H1F5	Homo sapiens (Human)	226
HPV-31_L2	P05141	ADT2	0.00731293	0.959166	0.167525	0.410815	ME5.22,ME6.21,ME7.20,ME8.7,ME9.7	ADT2_HUMAN	reviewed	ADP/ATP translocase 2 (ADP,ATP carrier protein 2) (ADP,ATP carrier protein, fibroblast isoform) (Adenine nucleotide translocator 2) (ANT 2) (Solute carrier family 25 member 5)	SLC25A5 ANT2	Homo sapiens (Human)	298
HPV-31_E1	Q7L5Y9	MAEA	0.000149745	6.21335e-11	0.599021	0.410636	ME9.10	MAEA_HUMAN	reviewed	Macrophage erythroblast attacher (Cell proliferation-inducing gene 5 protein) (Erythroblast macrophage protein) (Human lung cancer oncogene 10 protein) (HLC-10)	MAEA EMP HLC10 PIG5	Homo sapiens (Human)	396
HPV-31_E8^E2C	P62244	RS15A	0.00940116	0.836269	0.222285	0.410449	ME5.15,ME7.15,ME8.4,ME9.2	RS15A_HUMAN	reviewed	40S ribosomal protein S15a	RPS15A OK/SW-cl.82	Homo sapiens (Human)	130
HPV-31_L1	Q12906	ILF3	0.00343287	0.839225	0.220769	0.410286	ME6.20,ME7.22,ME8.10,ME9.12	ILF3_HUMAN	reviewed	Interleukin enhancer-binding factor 3 (Double-stranded RNA-binding protein 76) (DRBP76) (M-phase phosphoprotein 4) (MPP4) (Nuclear factor associated with dsRNA) (NFAR) (Nuclear factor of activated T-cells 90 kDa) (NF-AT-90) (Translational control protein 80) (TCP80)	ILF3 DRBF MPHOSPH4 NF90	Homo sapiens (Human)	894
HPV-31_E5	P0CG47	UBB	0.00903873	0.841795	0.219549	0.410276	ME5.14,ME6.18,ME8.6,ME9.6	UBB_HUMAN	reviewed	Polyubiquitin-B [Cleaved into: Ubiquitin]	UBB	Homo sapiens (Human)	229
HPV-31_L1	Q30KQ2	DB130	0.000412395	6.21335e-11	0.598157	0.410045	ME7.22	DB130_HUMAN	reviewed	Beta-defensin 130 (Beta-defensin 30) (DEFB-30) (Defensin, beta 130)	DEFB130 DEFB30; DEFB130L	Homo sapiens (Human)	79
HPV-31_E1^E4	Q14151	SAFB2	0.000334643	0.363242	0.434301	0.409791	ME6.16,ME8.5	SAFB2_HUMAN	reviewed	Scaffold attachment factor B2 (SAF-B2)	SAFB2 KIAA0138	Homo sapiens (Human)	953
HPV-31_L2	P62854	RS26	0.00941768	0.938006	0.175396	0.409695	ME5.22,ME6.21,ME7.20,ME8.7,ME9.7	RS26_HUMAN	reviewed	40S ribosomal protein S26	RPS26	Homo sapiens (Human)	115
HPV-31_E1^E4	Q07955	SRSF1	0.00164298	0.819555	0.227056	0.408516	ME6.16,ME7.16,ME8.5,ME9.3	SRSF1_HUMAN	reviewed	Serine/arginine-rich splicing factor 1 (Alternative-splicing factor 1) (ASF-1) (Splicing factor, arginine/serine-rich 1) (pre-mRNA-splicing factor SF2, P33 subunit)	SRSF1 ASF SF2 SF2P33 SFRS1 OK/SW-cl.3	Homo sapiens (Human)	248
HPV-31_E5	Q562R1	ACTBL	0.0024409	0.977495	0.155839	0.40843	ME5.14,ME6.18,ME7.17,ME8.6,ME9.6	ACTBL_HUMAN	reviewed	Beta-actin-like protein 2 (Kappa-actin)	ACTBL2	Homo sapiens (Human)	376
HPV-31_L1	P39023	RL3	0.00766622	0.974523	0.156905	0.408276	ME5.23,ME6.20,ME7.22,ME8.10,ME9.12	RL3_HUMAN	reviewed	60S ribosomal protein L3 (HIV-1 TAR RNA-binding protein B) (TARBP-B)	RPL3 OK/SW-cl.32	Homo sapiens (Human)	403
HPV-31_E2	P62913	RL11	0.00753217	0.955925	0.164013	0.407409	ME5.20,ME6.19,ME7.21,ME8.9,ME9.9	RL11_HUMAN	reviewed	60S ribosomal protein L11 (CLL-associated antigen KW-12)	RPL11	Homo sapiens (Human)	178
HPV-31_E6	P04350	TBB4A	0.0159995	0.972951	0.156041	0.407248	ME5.18,ME6.17,ME7.18,ME8.2,ME9.5	TBB4A_HUMAN	reviewed	Tubulin beta-4A chain (Tubulin 5 beta) (Tubulin beta-4 chain)	TUBB4A TUBB4 TUBB5	Homo sapiens (Human)	444
HPV-31_E1	P42677	RS27	0.0136856	0.943828	0.169017	0.407144	ME5.21,ME6.22,ME7.23,ME8.11,ME9.10	RS27_HUMAN	reviewed	40S ribosomal protein S27 (Metallopan-stimulin 1) (MPS-1)	RPS27 MPS1	Homo sapiens (Human)	84
HPV-31_E8^E2C	P39023	RL3	0.00646239	0.994305	0.145549	0.406587	ME5.15,ME6.15,ME7.15,ME8.4,ME9.2	RL3_HUMAN	reviewed	60S ribosomal protein L3 (HIV-1 TAR RNA-binding protein B) (TARBP-B)	RPL3 OK/SW-cl.32	Homo sapiens (Human)	403
HPV-31_E8^E2C	Q7L576	CYFP1	0.00231587	0.971591	0.154701	0.405827	ME5.15,ME6.15,ME7.15,ME8.4,ME9.2	CYFP1_HUMAN	reviewed	Cytoplasmic FMR1-interacting protein 1 (Specifically Rac1-associated protein 1) (Sra-1) (p140sra-1)	CYFIP1 KIAA0068	Homo sapiens (Human)	1253
HPV-31_E1	O95816	BAG2	0.00630139	0.853511	0.207488	0.405607	ME5.21,ME7.23,ME8.11,ME9.10	BAG2_HUMAN	reviewed	BAG family molecular chaperone regulator 2 (BAG-2) (Bcl-2-associated athanogene 2)	BAG2	Homo sapiens (Human)	211
HPV-31_E8^E2C	P15880	RS2	0.00802188	0.99468	0.143167	0.405079	ME5.15,ME6.15,ME7.15,ME8.4,ME9.2	RS2_HUMAN	reviewed	40S ribosomal protein S2 (40S ribosomal protein S4) (Protein LLRep3)	RPS2 RPS4	Homo sapiens (Human)	293
HPV-31_L1	Q9UHB9	SRP68	0.00071096	0.21534	0.493438	0.404699	ME5.23,ME9.12	SRP68_HUMAN	reviewed	Signal recognition particle 68 kDa protein (SRP68)	SRP68	Homo sapiens (Human)	627
HPV-31_E7	P08621	RU17	6.73675e-05	6.21335e-11	0.590248	0.404622	ME7.19	RU17_HUMAN	reviewed	U1 small nuclear ribonucleoprotein 70 kDa (U1 snRNP 70 kDa) (U1-70K) (snRNP70)	SNRNP70 RNPU1Z RPU1 SNRP70 U1AP1	Homo sapiens (Human)	437
HPV-31_L2	P00403	COX2	0.00022805	6.21335e-11	0.589821	0.404329	ME7.20	COX2_HUMAN	reviewed	Cytochrome c oxidase subunit 2 (Cytochrome c oxidase polypeptide II)	MT-CO2 COII COXII MTCO2	Homo sapiens (Human)	227
HPV-31_L2	Q9Y4P3	TBL2	0.000117052	6.21335e-11	0.589821	0.404329	ME7.20	TBL2_HUMAN	reviewed	Transducin beta-like protein 2 (WS beta-transducin repeats protein) (WS-betaTRP) (Williams-Beuren syndrome chromosomal region 13 protein)	TBL2 WBSCR13 UNQ563/PRO1125	Homo sapiens (Human)	447
HPV-31_L1	P46781	RS9	0.00756813	0.846385	0.20804	0.403794	ME6.20,ME7.22,ME8.10,ME9.12	RS9_HUMAN	reviewed	40S ribosomal protein S9	RPS9	Homo sapiens (Human)	194
HPV-31_E5	Q07021	C1QBP	0.00509139	0.83461	0.213359	0.403793	ME5.14,ME6.18,ME7.17,ME8.6,ME9.6	C1QBP_HUMAN	reviewed	Complement component 1 Q subcomponent-binding protein, mitochondrial (ASF/SF2-associated protein p32) (Glycoprotein gC1qBP) (C1qBP) (Hyaluronan-binding protein 1) (Mitochondrial matrix protein p32) (gC1q-R protein) (p33)	C1QBP GC1QBP HABP1 SF2P32	Homo sapiens (Human)	282
HPV-31_L2	P62701	RS4X	0.00881421	0.995342	0.140441	0.403419	ME5.22,ME6.21,ME7.20,ME8.7,ME9.7	RS4X_HUMAN	reviewed	40S ribosomal protein S4, X isoform (SCR10) (Single copy abundant mRNA protein)	RPS4X CCG2 RPS4 SCAR	Homo sapiens (Human)	263
HPV-31_E8^E2C	P11940	PABP1	0.0138116	0.997074	0.139455	0.403307	ME5.15,ME6.15,ME7.15,ME8.4,ME9.2	PABP1_HUMAN	reviewed	Polyadenylate-binding protein 1 (PABP-1) (Poly(A)-binding protein 1)	PABPC1 PAB1 PABP1 PABPC2	Homo sapiens (Human)	636
HPV-31_L1	P50990	TCPQ	0.000861721	0.403934	0.406404	0.403225	ME6.20,ME8.10	TCPQ_HUMAN	reviewed	T-complex protein 1 subunit theta (TCP-1-theta) (CCT-theta) (Renal carcinoma antigen NY-REN-15)	CCT8 C21orf112 CCTQ KIAA0002	Homo sapiens (Human)	548
HPV-31_L2	P62888	RL30	0.0103171	0.952277	0.159469	0.403185	ME5.22,ME6.21,ME7.20,ME8.7,ME9.7	RL30_HUMAN	reviewed	60S ribosomal protein L30	RPL30	Homo sapiens (Human)	115
HPV-31_E1^E4	Q562R1	ACTBL	0.00199552	0.990269	0.142442	0.403185	ME5.17,ME6.16,ME7.16,ME8.5,ME9.3	ACTBL_HUMAN	reviewed	Beta-actin-like protein 2 (Kappa-actin)	ACTBL2	Homo sapiens (Human)	376
HPV-31_E1	P24941	CDK2	0.00251473	0.594884	0.32021	0.403062	ME7.23,ME8.11,ME9.10	CDK2_HUMAN	reviewed	Cyclin-dependent kinase 2 (EC 2.7.11.22) (Cell division protein kinase 2) (p33 protein kinase)	CDK2 CDKN2	Homo sapiens (Human)	298
HPV-31_E6	P49411	EFTU	0.00263253	0.767135	0.242343	0.402828	ME5.18,ME6.17,ME7.18,ME9.5	EFTU_HUMAN	reviewed	Elongation factor Tu, mitochondrial (EF-Tu) (P43)	TUFM	Homo sapiens (Human)	452
HPV-31_L1	P61313	RL15	0.00534235	0.934079	0.166982	0.402691	ME5.23,ME6.20,ME7.22,ME8.10,ME9.12	RL15_HUMAN	reviewed	60S ribosomal protein L15	RPL15 EC45 TCBAP0781	Homo sapiens (Human)	204
HPV-31_E8^E2C	P05388	RLA0	0.00450955	0.989402	0.141784	0.402482	ME5.15,ME6.15,ME7.15,ME8.4,ME9.2	RLA0_HUMAN	reviewed	60S acidic ribosomal protein P0 (60S ribosomal protein L10E)	RPLP0	Homo sapiens (Human)	317
HPV-31_L2	Q02878	RL6	0.00606969	0.977939	0.146892	0.402456	ME5.22,ME6.21,ME7.20,ME8.7,ME9.7	RL6_HUMAN	reviewed	60S ribosomal protein L6 (Neoplasm-related protein C140) (Tax-responsive enhancer element-binding protein 107) (TaxREB107)	RPL6 TXREB1	Homo sapiens (Human)	288
HPV-31_E5	Q86TS9	RM52	0.000296722	6.21335e-11	0.587074	0.402447	ME7.17	RM52_HUMAN	reviewed	39S ribosomal protein L52, mitochondrial (L52mt) (MRP-L52)	MRPL52	Homo sapiens (Human)	123
HPV-31_L1	P31943	HNRH1	0.00400461	0.986227	0.142659	0.402098	ME5.23,ME6.20,ME7.22,ME8.10,ME9.12	HNRH1_HUMAN	reviewed	Heterogeneous nuclear ribonucleoprotein H (hnRNP H) [Cleaved into: Heterogeneous nuclear ribonucleoprotein H, N-terminally processed]	HNRNPH1 HNRPH HNRPH1	Homo sapiens (Human)	449
HPV-31_E8^E2C	P62241	RS8	0.0172248	0.960795	0.153839	0.401994	ME5.15,ME6.15,ME7.15,ME8.4,ME9.2	RS8_HUMAN	reviewed	40S ribosomal protein S8	RPS8 OK/SW-cl.83	Homo sapiens (Human)	208
HPV-31_L1	Q00839	HNRPU	0.00506426	0.992492	0.138597	0.401253	ME5.23,ME6.20,ME7.22,ME8.10,ME9.12	HNRPU_HUMAN	reviewed	Heterogeneous nuclear ribonucleoprotein U (hnRNP U) (Scaffold attachment factor A) (SAF-A) (p120) (pp120)	HNRNPU HNRPU SAFA U21.1	Homo sapiens (Human)	825
HPV-31_L2	P52272	HNRPM	0.00557758	0.957343	0.154304	0.401179	ME5.22,ME6.21,ME7.20,ME8.7,ME9.7	HNRPM_HUMAN	reviewed	Heterogeneous nuclear ribonucleoprotein M (hnRNP M)	HNRNPM HNRPM NAGR1	Homo sapiens (Human)	730
HPV-31_L2	P68371	TBB4B	0.0190926	0.98916	0.139135	0.400678	ME5.22,ME6.21,ME7.20,ME8.7,ME9.7	TBB4B_HUMAN	reviewed	Tubulin beta-4B chain (Tubulin beta-2 chain) (Tubulin beta-2C chain)	TUBB4B TUBB2C	Homo sapiens (Human)	445
HPV-31_L1	P62280	RS11	0.00739851	0.837565	0.20679	0.400215	ME6.20,ME7.22,ME8.10,ME9.12	RS11_HUMAN	reviewed	40S ribosomal protein S11	RPS11	Homo sapiens (Human)	158
HPV-31_L2	P49207	RL34	0.00573476	0.973766	0.145228	0.400025	ME5.22,ME6.21,ME7.20,ME8.7,ME9.7	RL34_HUMAN	reviewed	60S ribosomal protein L34	RPL34	Homo sapiens (Human)	117
HPV-31_E8^E2C	P62913	RL11	0.00667992	0.966413	0.148206	0.399804	ME5.15,ME6.15,ME7.15,ME8.4,ME9.2	RL11_HUMAN	reviewed	60S ribosomal protein L11 (CLL-associated antigen KW-12)	RPL11	Homo sapiens (Human)	178
HPV-31_E5	O75821	EIF3G	0.00182566	0.820882	0.212968	0.399269	ME6.18,ME7.17,ME8.6,ME9.6	EIF3G_HUMAN	reviewed	Eukaryotic translation initiation factor 3 subunit G (eIF3g) (Eukaryotic translation initiation factor 3 RNA-binding subunit) (eIF-3 RNA-binding subunit) (Eukaryotic translation initiation factor 3 subunit 4) (eIF-3-delta) (eIF3 p42) (eIF3 p44)	EIF3G EIF3S4	Homo sapiens (Human)	320
HPV-31_E1^E4	P32780	TF2H1	6.55009e-05	6.21335e-11	0.582292	0.399167	ME7.16	TF2H1_HUMAN	reviewed	General transcription factor IIH subunit 1 (Basic transcription factor 2 62 kDa subunit) (BTF2 p62) (General transcription factor IIH polypeptide 1) (TFIIH basal transcription factor complex p62 subunit)	GTF2H1 BTF2	Homo sapiens (Human)	548
HPV-31_E6	P68371	TBB4B	0.0193878	0.978484	0.141286	0.39886	ME5.18,ME6.17,ME7.18,ME8.2,ME9.5	TBB4B_HUMAN	reviewed	Tubulin beta-4B chain (Tubulin beta-2 chain) (Tubulin beta-2C chain)	TUBB4B TUBB2C	Homo sapiens (Human)	445
HPV-31_L2	P62263	RS14	0.0076785	0.990535	0.13494	0.398158	ME5.22,ME6.21,ME7.20,ME8.7,ME9.7	RS14_HUMAN	reviewed	40S ribosomal protein S14	RPS14 PRO2640	Homo sapiens (Human)	151
HPV-31_L1	P62854	RS26	0.00917141	0.908698	0.170809	0.397507	ME5.23,ME6.20,ME7.22,ME8.10,ME9.12	RS26_HUMAN	reviewed	40S ribosomal protein S26	RPS26	Homo sapiens (Human)	115
HPV-31_E7	Q9BUT9	F195A	0.00334976	0.906238	0.171147	0.396944	ME5.19,ME6.23,ME7.19,ME8.8,ME9.8	F195A_HUMAN	reviewed	Protein FAM195A	FAM195A C16orf14	Homo sapiens (Human)	160
HPV-31_E8^E2C	P46781	RS9	0.00677837	0.844881	0.198718	0.396935	ME5.15,ME7.15,ME8.4,ME9.2	RS9_HUMAN	reviewed	40S ribosomal protein S9	RPS9	Homo sapiens (Human)	194
HPV-31_E6	Q14103	HNRPD	0.00220412	0.950562	0.150238	0.39628	ME5.18,ME6.17,ME7.18,ME8.2,ME9.5	HNRPD_HUMAN	reviewed	Heterogeneous nuclear ribonucleoprotein D0 (hnRNP D0) (AU-rich element RNA-binding protein 1)	HNRNPD AUF1 HNRPD	Homo sapiens (Human)	355
HPV-31_E5	P52815	RM12	0.00171007	0.528589	0.339936	0.396126	ME7.17,ME8.6,ME9.6	RM12_HUMAN	reviewed	39S ribosomal protein L12, mitochondrial (L12mt) (MRP-L12) (5c5-2)	MRPL12 RPML12	Homo sapiens (Human)	198
HPV-31_E2	Q93009	UBP7	0.000264239	0.308417	0.438847	0.395991	ME7.21,ME9.9	UBP7_HUMAN	reviewed	Ubiquitin carboxyl-terminal hydrolase 7 (EC 3.4.19.12) (Deubiquitinating enzyme 7) (Herpesvirus-associated ubiquitin-specific protease) (Ubiquitin thioesterase 7) (Ubiquitin-specific-processing protease 7)	USP7 HAUSP	Homo sapiens (Human)	1102
HPV-31_L2	P46779	RL28	0.00910918	0.992957	0.129045	0.394873	ME5.22,ME6.21,ME7.20,ME8.7,ME9.7	RL28_HUMAN	reviewed	60S ribosomal protein L28	RPL28	Homo sapiens (Human)	137
HPV-31_E2	P62269	RS18	0.0129685	0.968766	0.139786	0.394796	ME5.20,ME6.19,ME7.21,ME8.9,ME9.9	RS18_HUMAN	reviewed	40S ribosomal protein S18 (Ke-3) (Ke3)	RPS18 D6S218E	Homo sapiens (Human)	152
HPV-31_E8^E2C	P62847	RS24	0.00818103	0.912921	0.164267	0.394319	ME5.15,ME6.15,ME7.15,ME8.4,ME9.2	RS24_HUMAN	reviewed	40S ribosomal protein S24	RPS24	Homo sapiens (Human)	133
HPV-31_E8^E2C	P18124	RL7	0.00655224	0.9502	0.147352	0.394216	ME5.15,ME6.15,ME7.15,ME8.4,ME9.2	RL7_HUMAN	reviewed	60S ribosomal protein L7	RPL7	Homo sapiens (Human)	248
HPV-31_E2	P52292	IMA2	0.000566838	0.419955	0.385978	0.394164	ME7.21,ME9.9	IMA2_HUMAN	reviewed	Importin subunit alpha-2 (Karyopherin subunit alpha-2) (RAG cohort protein 1) (SRP1-alpha)	KPNA2 RCH1 SRP1	Homo sapiens (Human)	529
HPV-31_E6	Q5H9R7	PP6R3	4.03028e-05	6.21335e-11	0.574714	0.393973	ME7.18	PP6R3_HUMAN	reviewed	Serine/threonine-protein phosphatase 6 regulatory subunit 3 (SAPS domain family member 3) (Sporulation-induced transcript 4-associated protein SAPL)	PPP6R3 C11orf23 KIAA1558 PP6R3 SAPL SAPS3	Homo sapiens (Human)	873
HPV-31_L2	Q9H853	TBA4B	0.000596242	6.21335e-11	0.574544	0.393859	ME9.7	TBA4B_HUMAN	reviewed	Putative tubulin-like protein alpha-4B (Alpha-tubulin 4B)	TUBA4B TUBA4	Homo sapiens (Human)	241
HPV-31_E7	P35579	MYH9	0.000160069	6.21335e-11	0.574128	0.393571	ME6.23	MYH9_HUMAN	reviewed	Myosin-9 (Cellular myosin heavy chain, type A) (Myosin heavy chain 9) (Myosin heavy chain, non-muscle IIa) (Non-muscle myosin heavy chain A) (NMMHC-A) (Non-muscle myosin heavy chain IIa) (NMMHC II-a) (NMMHC-IIA)	MYH9	Homo sapiens (Human)	1960
HPV-31_L1	Q9NR30	DDX21	0.00040134	0.627936	0.291203	0.393362	ME7.22,ME8.10,ME9.12	DDX21_HUMAN	reviewed	Nucleolar RNA helicase 2 (EC 3.6.4.13) (DEAD box protein 21) (Gu-alpha) (Nucleolar RNA helicase Gu) (Nucleolar RNA helicase II) (RH II/Gu)	DDX21	Homo sapiens (Human)	783
HPV-31_L2	P61247	RS3A	0.00594304	0.986959	0.129395	0.393244	ME5.22,ME6.21,ME7.20,ME8.7,ME9.7	RS3A_HUMAN	reviewed	40S ribosomal protein S3a (v-fos transformation effector protein) (Fte-1)	RPS3A FTE1 MFTL	Homo sapiens (Human)	264
HPV-31_L2	P40429	RL13A	0.00382265	0.969377	0.137101	0.393089	ME5.22,ME6.21,ME7.20,ME8.7,ME9.7	RL13A_HUMAN	reviewed	60S ribosomal protein L13a (23 kDa highly basic protein)	RPL13A	Homo sapiens (Human)	203
HPV-31_E2	Q15393	SF3B3	0.000283233	0.381541	0.401639	0.393046	ME7.21,ME9.9	SF3B3_HUMAN	reviewed	Splicing factor 3B subunit 3 (Pre-mRNA-splicing factor SF3b 130 kDa subunit) (SF3b130) (STAF130) (Spliceosome-associated protein 130) (SAP 130)	SF3B3 KIAA0017 SAP130	Homo sapiens (Human)	1217
HPV-31_E1^E4	P63261	ACTG	0.00650354	0.854135	0.18848	0.39277	ME6.16,ME7.16,ME8.5,ME9.3	ACTG_HUMAN	reviewed	Actin, cytoplasmic 2 (Gamma-actin) [Cleaved into: Actin, cytoplasmic 2, N-terminally processed]	ACTG1 ACTB ACTG	Homo sapiens (Human)	375
HPV-31_E1^E4	O14979	HNRDL	0.00105003	0.599288	0.302953	0.392582	ME7.16,ME8.5,ME9.3	HNRDL_HUMAN	reviewed	Heterogeneous nuclear ribonucleoprotein D-like (hnRNP D-like) (hnRNP DL) (AU-rich element RNA-binding factor) (JKT41-binding protein) (Protein laAUF1)	HNRPDL JKTBP	Homo sapiens (Human)	420
HPV-31_E1	P46779	RL28	0.00880464	0.975509	0.132886	0.392121	ME5.21,ME6.22,ME7.23,ME8.11,ME9.10	RL28_HUMAN	reviewed	60S ribosomal protein L28	RPL28	Homo sapiens (Human)	137
HPV-31_E2	P11940	PABP1	0.0138999	0.95903	0.140222	0.392096	ME5.20,ME6.19,ME7.21,ME8.9,ME9.9	PABP1_HUMAN	reviewed	Polyadenylate-binding protein 1 (PABP-1) (Poly(A)-binding protein 1)	PABPC1 PAB1 PABP1 PABPC2	Homo sapiens (Human)	636
HPV-31_E2	Q9H0A0	NAT10	0.000403103	6.21335e-11	0.571585	0.391829	ME7.21	NAT10_HUMAN	reviewed	N-acetyltransferase 10 (EC 2.3.1.-)	NAT10 ALP KIAA1709	Homo sapiens (Human)	1025
HPV-31_L2	P46781	RS9	0.00491973	0.968745	0.135238	0.391623	ME5.22,ME6.21,ME7.20,ME8.7,ME9.7	RS9_HUMAN	reviewed	40S ribosomal protein S9	RPS9	Homo sapiens (Human)	194
HPV-31_E2	P62263	RS14	0.00620895	0.996794	0.122241	0.391375	ME5.20,ME6.19,ME7.21,ME8.9,ME9.9	RS14_HUMAN	reviewed	40S ribosomal protein S14	RPS14 PRO2640	Homo sapiens (Human)	151
HPV-31_E1^E4	P22061	PIMT	0.0039514	0.928775	0.152833	0.391347	ME5.17,ME6.16,ME7.16,ME8.5,ME9.3	PIMT_HUMAN	reviewed	Protein-L-isoaspartate(D-aspartate) O-methyltransferase (PIMT) (EC 2.1.1.77) (L-isoaspartyl protein carboxyl methyltransferase) (Protein L-isoaspartyl/D-aspartyl methyltransferase) (Protein-beta-aspartate methyltransferase)	PCMT1	Homo sapiens (Human)	227
HPV-31_E1	P40429	RL13A	0.00391026	0.92564	0.153913	0.39112	ME5.21,ME6.22,ME7.23,ME8.11,ME9.10	RL13A_HUMAN	reviewed	60S ribosomal protein L13a (23 kDa highly basic protein)	RPL13A	Homo sapiens (Human)	203
HPV-31_E8^E2C	Q00839	HNRPU	0.00441193	0.963017	0.136928	0.391012	ME5.15,ME6.15,ME7.15,ME8.4,ME9.2	HNRPU_HUMAN	reviewed	Heterogeneous nuclear ribonucleoprotein U (hnRNP U) (Scaffold attachment factor A) (SAF-A) (p120) (pp120)	HNRNPU HNRPU SAFA U21.1	Homo sapiens (Human)	825
HPV-31_E5	Q00325	MPCP	0.00373462	0.702792	0.253772	0.390818	ME6.18,ME7.17,ME8.6,ME9.6	MPCP_HUMAN	reviewed	Phosphate carrier protein, mitochondrial (Phosphate transport protein) (PTP) (Solute carrier family 25 member 3)	SLC25A3 PHC OK/SW-cl.48	Homo sapiens (Human)	362
HPV-31_E8^E2C	P62917	RL8	0.00546653	0.942716	0.145657	0.390738	ME5.15,ME6.15,ME7.15,ME8.4,ME9.2	RL8_HUMAN	reviewed	60S ribosomal protein L8	RPL8	Homo sapiens (Human)	257
HPV-31_L1	P62424	RL7A	0.00769019	0.982623	0.127123	0.390358	ME5.23,ME6.20,ME7.22,ME8.10,ME9.12	RL7A_HUMAN	reviewed	60S ribosomal protein L7a (PLA-X polypeptide) (Surfeit locus protein 3)	RPL7A SURF-3 SURF3	Homo sapiens (Human)	266
HPV-31_E8^E2C	P67809	YBOX1	0.0132941	0.94697	0.142922	0.390222	ME5.15,ME6.15,ME7.15,ME8.4,ME9.2	YBOX1_HUMAN	reviewed	Nuclease-sensitive element-binding protein 1 (CCAAT-binding transcription factor I subunit A) (CBF-A) (DNA-binding protein B) (DBPB) (Enhancer factor I subunit A) (EFI-A) (Y-box transcription factor) (Y-box-binding protein 1) (YB-1)	YBX1 NSEP1 YB1	Homo sapiens (Human)	324
HPV-31_E8^E2C	P62269	RS18	0.0134127	0.943995	0.143886	0.389966	ME5.15,ME6.15,ME7.15,ME8.4,ME9.2	RS18_HUMAN	reviewed	40S ribosomal protein S18 (Ke-3) (Ke3)	RPS18 D6S218E	Homo sapiens (Human)	152
HPV-31_L2	P22087	FBRL	0.000420353	0.414101	0.382057	0.389669	ME7.20,ME9.7	FBRL_HUMAN	reviewed	rRNA 2'-O-methyltransferase fibrillarin (EC 2.1.1.-) (34 kDa nucleolar scleroderma antigen)	FBL FIB1 FLRN	Homo sapiens (Human)	321
HPV-31_E5	O00161	SNP23	0.00954294	0.890717	0.167303	0.389558	ME5.14,ME6.18,ME7.17,ME8.6,ME9.6	SNP23_HUMAN	reviewed	Synaptosomal-associated protein 23 (SNAP-23) (Vesicle-membrane fusion protein SNAP-23)	SNAP23	Homo sapiens (Human)	211
HPV-31_E5	P60709	ACTB	0.00696002	0.95767	0.136934	0.389381	ME5.14,ME6.18,ME7.17,ME8.6,ME9.6	ACTB_HUMAN	reviewed	Actin, cytoplasmic 1 (Beta-actin) [Cleaved into: Actin, cytoplasmic 1, N-terminally processed]	ACTB	Homo sapiens (Human)	375
HPV-31_E2	P84098	RL19	0.00333629	0.969736	0.131412	0.389296	ME5.20,ME6.19,ME7.21,ME8.9,ME9.9	RL19_HUMAN	reviewed	60S ribosomal protein L19	RPL19	Homo sapiens (Human)	196
HPV-31_E5	Q8IZP0	ABI1	0.00140213	0.83663	0.191169	0.389182	ME6.18,ME7.17,ME8.6,ME9.6	ABI1_HUMAN	reviewed	Abl interactor 1 (Abelson interactor 1) (Abi-1) (Abl-binding protein 4) (AblBP4) (Eps8 SH3 domain-binding protein) (Eps8-binding protein) (Nap1-binding protein) (Nap1BP) (Spectrin SH3 domain-binding protein 1) (e3B1)	ABI1 SSH3BP1	Homo sapiens (Human)	508
HPV-31_E1^E4	P05141	ADT2	0.00390583	0.997893	0.118035	0.388818	ME5.17,ME6.16,ME7.16,ME8.5,ME9.3	ADT2_HUMAN	reviewed	ADP/ATP translocase 2 (ADP,ATP carrier protein 2) (ADP,ATP carrier protein, fibroblast isoform) (Adenine nucleotide translocator 2) (ANT 2) (Solute carrier family 25 member 5)	SLC25A5 ANT2	Homo sapiens (Human)	298
HPV-31_E1^E4	P68363	TBA1B	0.0174954	0.970225	0.130299	0.388769	ME5.17,ME6.16,ME7.16,ME8.5,ME9.3	TBA1B_HUMAN	reviewed	Tubulin alpha-1B chain (Alpha-tubulin ubiquitous) (Tubulin K-alpha-1) (Tubulin alpha-ubiquitous chain)	TUBA1B	Homo sapiens (Human)	451
HPV-31_E1	P55884	EIF3B	0.00123554	0.968303	0.131143	0.388658	ME5.21,ME6.22,ME7.23,ME8.11,ME9.10	EIF3B_HUMAN	reviewed	Eukaryotic translation initiation factor 3 subunit B (eIF3b) (Eukaryotic translation initiation factor 3 subunit 9) (Prt1 homolog) (hPrt1) (eIF-3-eta) (eIF3 p110) (eIF3 p116)	EIF3B EIF3S9	Homo sapiens (Human)	814
HPV-31_E2	Q7Z417	NUFP2	0.00915004	0.96899	0.130705	0.388617	ME5.20,ME6.19,ME7.21,ME8.9,ME9.9	NUFP2_HUMAN	reviewed	Nuclear fragile X mental retardation-interacting protein 2 (82 kDa FMRP-interacting protein) (82-FIP) (Cell proliferation-inducing gene 1 protein) (FMRP-interacting protein 2)	NUFIP2 KIAA1321 PIG1	Homo sapiens (Human)	695
HPV-31_E1^E4	Q13748	TBA3C	0.0100369	0.818796	0.198155	0.388521	ME5.17,ME6.16,ME7.16,ME9.3	TBA3C_HUMAN	reviewed	Tubulin alpha-3C/D chain (Alpha-tubulin 2) (Alpha-tubulin 3C/D) (Tubulin alpha-2 chain)	TUBA3C TUBA2; TUBA3D	Homo sapiens (Human)	450
HPV-31_E7	Q9H7D7	WDR26	0.000159166	0.416918	0.379078	0.388495	ME6.23,ME7.19	WDR26_HUMAN	reviewed	WD repeat-containing protein 26 (CUL4- and DDB1-associated WDR protein 2) (Myocardial ischemic preconditioning up-regulated protein 2)	WDR26 CDW2 MIP2 PRO0852	Homo sapiens (Human)	661
HPV-31_L2	P26373	RL13	0.00633384	0.97354	0.128256	0.388325	ME5.22,ME6.21,ME7.20,ME8.7,ME9.7	RL13_HUMAN	reviewed	60S ribosomal protein L13 (Breast basic conserved protein 1)	RPL13 BBC1 OK/SW-cl.46	Homo sapiens (Human)	211
HPV-31_L2	P30050	RL12	0.00770406	0.983584	0.123375	0.388086	ME5.22,ME6.21,ME7.20,ME8.7,ME9.7	RL12_HUMAN	reviewed	60S ribosomal protein L12	RPL12	Homo sapiens (Human)	165
HPV-31_L1	P51991	ROA3	0.0035521	0.955258	0.135706	0.387775	ME5.23,ME6.20,ME7.22,ME8.10,ME9.12	ROA3_HUMAN	reviewed	Heterogeneous nuclear ribonucleoprotein A3 (hnRNP A3)	HNRNPA3 HNRPA3	Homo sapiens (Human)	378
HPV-31_E1	A6NKZ8	YI016	0.000989278	6.21335e-11	0.565242	0.387485	ME6.22	YI016_HUMAN	reviewed	Putative tubulin beta chain-like protein ENSP00000290377		Homo sapiens (Human)	372
HPV-31_E7	P36542	ATPG	0.00132773	0.648424	0.273238	0.387373	ME6.23,ME7.19,ME9.8	ATPG_HUMAN	reviewed	ATP synthase subunit gamma, mitochondrial (F-ATPase gamma subunit)	ATP5C1 ATP5C ATP5CL1	Homo sapiens (Human)	298
HPV-31_L2	P52597	HNRPF	0.00271289	0.957421	0.133776	0.387114	ME5.22,ME6.21,ME7.20,ME8.7,ME9.7	HNRPF_HUMAN	reviewed	Heterogeneous nuclear ribonucleoprotein F (hnRNP F) (Nucleolin-like protein mcs94-1) [Cleaved into: Heterogeneous nuclear ribonucleoprotein F, N-terminally processed]	HNRNPF HNRPF	Homo sapiens (Human)	415
HPV-31_E6	P52815	RM12	0.00132411	0.669455	0.263214	0.386991	ME7.18,ME8.2,ME9.5	RM12_HUMAN	reviewed	39S ribosomal protein L12, mitochondrial (L12mt) (MRP-L12) (5c5-2)	MRPL12 RPML12	Homo sapiens (Human)	198
HPV-31_L1	P61247	RS3A	0.00876233	0.829611	0.190779	0.386793	ME6.20,ME7.22,ME8.10,ME9.12	RS3A_HUMAN	reviewed	40S ribosomal protein S3a (v-fos transformation effector protein) (Fte-1)	RPS3A FTE1 MFTL	Homo sapiens (Human)	264
HPV-31_E1^E4	P38159	RBMX	0.00409953	0.858093	0.177386	0.386372	ME6.16,ME7.16,ME8.5,ME9.3	RBMX_HUMAN	reviewed	RNA-binding motif protein, X chromosome (Glycoprotein p43) (Heterogeneous nuclear ribonucleoprotein G) (hnRNP G) [Cleaved into: RNA-binding motif protein, X chromosome, N-terminally processed]	RBMX HNRPG RBMXP1	Homo sapiens (Human)	391
HPV-31_E8^E2C	P26196	DDX6	0.0138681	0.968531	0.127005	0.385967	ME5.15,ME6.15,ME7.15,ME8.4,ME9.2	DDX6_HUMAN	reviewed	Probable ATP-dependent RNA helicase DDX6 (EC 3.6.4.13) (ATP-dependent RNA helicase p54) (DEAD box protein 6) (Oncogene RCK)	DDX6 HLR2 RCK	Homo sapiens (Human)	483
HPV-31_E5	P05141	ADT2	0.00546542	0.972244	0.125202	0.385826	ME5.14,ME6.18,ME7.17,ME8.6,ME9.6	ADT2_HUMAN	reviewed	ADP/ATP translocase 2 (ADP,ATP carrier protein 2) (ADP,ATP carrier protein, fibroblast isoform) (Adenine nucleotide translocator 2) (ANT 2) (Solute carrier family 25 member 5)	SLC25A5 ANT2	Homo sapiens (Human)	298
HPV-31_L2	P42766	RL35	0.00442991	0.950652	0.13477	0.385717	ME5.22,ME6.21,ME7.20,ME8.7,ME9.7	RL35_HUMAN	reviewed	60S ribosomal protein L35	RPL35	Homo sapiens (Human)	123
HPV-31_E7	P60866	RS20	0.00387631	0.626939	0.280435	0.385694	ME6.23,ME7.19,ME9.8	RS20_HUMAN	reviewed	40S ribosomal protein S20	RPS20	Homo sapiens (Human)	119
HPV-31_L1	P61353	RL27	0.00625178	0.876918	0.16788	0.385676	ME5.23,ME6.20,ME7.22,ME8.10,ME9.12	RL27_HUMAN	reviewed	60S ribosomal protein L27	RPL27	Homo sapiens (Human)	136
HPV-31_E1	P63208	SKP1	0.000760291	0.430128	0.368922	0.385612	ME7.23,ME9.10	SKP1_HUMAN	reviewed	S-phase kinase-associated protein 1 (Cyclin-A/CDK2-associated protein p19) (Organ of Corti protein 2) (OCP-2) (Organ of Corti protein II) (OCP-II) (RNA polymerase II elongation factor-like protein) (SIII) (Transcription elongation factor B) (p19A) (p19skp1)	SKP1 EMC19 OCP2 SKP1A TCEB1L	Homo sapiens (Human)	163
HPV-31_L2	Q63ZY3	KANK2	0.000131309	0.428376	0.369577	0.385517	ME6.21,ME9.7	KANK2_HUMAN	reviewed	KN motif and ankyrin repeat domain-containing protein 2 (Ankyrin repeat domain-containing protein 25) (Matrix-remodeling-associated protein 3) (SRC-1-interacting protein) (SIP) (SRC-interacting protein) (SRC1-interacting protein)	KANK2 ANKRD25 KIAA1518 MXRA3 SIP	Homo sapiens (Human)	851
HPV-31_E2	P26196	DDX6	0.0146486	0.953149	0.133201	0.385473	ME5.20,ME6.19,ME7.21,ME8.9,ME9.9	DDX6_HUMAN	reviewed	Probable ATP-dependent RNA helicase DDX6 (EC 3.6.4.13) (ATP-dependent RNA helicase p54) (DEAD box protein 6) (Oncogene RCK)	DDX6 HLR2 RCK	Homo sapiens (Human)	483
HPV-31_L1	O43390	HNRPR	0.00272798	0.790835	0.206338	0.385459	ME6.20,ME7.22,ME8.10,ME9.12	HNRPR_HUMAN	reviewed	Heterogeneous nuclear ribonucleoprotein R (hnRNP R)	HNRNPR HNRPR	Homo sapiens (Human)	633
HPV-31_E1	Q9H7D7	WDR26	0.000204409	6.21335e-11	0.56222	0.385409	ME7.23	WDR26_HUMAN	reviewed	WD repeat-containing protein 26 (CUL4- and DDB1-associated WDR protein 2) (Myocardial ischemic preconditioning up-regulated protein 2)	WDR26 CDW2 MIP2 PRO0852	Homo sapiens (Human)	661
HPV-31_E8^E2C	P36578	RL4	0.00897647	0.956908	0.131462	0.385407	ME5.15,ME6.15,ME7.15,ME8.4,ME9.2	RL4_HUMAN	reviewed	60S ribosomal protein L4 (60S ribosomal protein L1)	RPL4 RPL1	Homo sapiens (Human)	427
HPV-31_E7	P49411	EFTU	0.00287753	0.660318	0.264897	0.385334	ME6.23,ME7.19,ME9.8	EFTU_HUMAN	reviewed	Elongation factor Tu, mitochondrial (EF-Tu) (P43)	TUFM	Homo sapiens (Human)	452
HPV-31_E8^E2C	Q9UN86	G3BP2	0.00542604	0.967786	0.126321	0.385218	ME5.15,ME6.15,ME7.15,ME8.4,ME9.2	G3BP2_HUMAN	reviewed	Ras GTPase-activating protein-binding protein 2 (G3BP-2) (GAP SH3 domain-binding protein 2)	G3BP2 KIAA0660	Homo sapiens (Human)	482
HPV-31_E8^E2C	Q15717	ELAV1	0.00471129	0.926044	0.144619	0.384878	ME5.15,ME6.15,ME7.15,ME8.4,ME9.2	ELAV1_HUMAN	reviewed	ELAV-like protein 1 (Hu-antigen R) (HuR)	ELAVL1 HUR	Homo sapiens (Human)	326
HPV-31_E2	Q00839	HNRPU	0.00431869	0.948553	0.134423	0.384831	ME5.20,ME6.19,ME7.21,ME8.9,ME9.9	HNRPU_HUMAN	reviewed	Heterogeneous nuclear ribonucleoprotein U (hnRNP U) (Scaffold attachment factor A) (SAF-A) (p120) (pp120)	HNRNPU HNRPU SAFA U21.1	Homo sapiens (Human)	825
HPV-31_E1^E4	Q7Z417	NUFP2	0.00809191	0.997957	0.111852	0.384623	ME5.17,ME6.16,ME7.16,ME8.5,ME9.3	NUFP2_HUMAN	reviewed	Nuclear fragile X mental retardation-interacting protein 2 (82 kDa FMRP-interacting protein) (82-FIP) (Cell proliferation-inducing gene 1 protein) (FMRP-interacting protein 2)	NUFIP2 KIAA1321 PIG1	Homo sapiens (Human)	695
HPV-31_E2	P62899	RL31	0.0109335	0.904872	0.153669	0.384587	ME5.20,ME6.19,ME7.21,ME8.9,ME9.9	RL31_HUMAN	reviewed	60S ribosomal protein L31	RPL31	Homo sapiens (Human)	125
HPV-31_E1^E4	P07437	TBB5	0.0212899	0.974782	0.122068	0.384555	ME5.17,ME6.16,ME7.16,ME8.5,ME9.3	TBB5_HUMAN	reviewed	Tubulin beta chain (Tubulin beta-5 chain)	TUBB TUBB5 OK/SW-cl.56	Homo sapiens (Human)	444
HPV-31_E2	P67809	YBOX1	0.0122877	0.949437	0.133547	0.384551	ME5.20,ME6.19,ME7.21,ME8.9,ME9.9	YBOX1_HUMAN	reviewed	Nuclease-sensitive element-binding protein 1 (CCAAT-binding transcription factor I subunit A) (CBF-A) (DNA-binding protein B) (DBPB) (Enhancer factor I subunit A) (EFI-A) (Y-box transcription factor) (Y-box-binding protein 1) (YB-1)	YBX1 NSEP1 YB1	Homo sapiens (Human)	324
HPV-31_E8^E2C	P09651	ROA1	0.00601499	0.995773	0.112482	0.38437	ME5.15,ME6.15,ME7.15,ME8.4,ME9.2	ROA1_HUMAN	reviewed	Heterogeneous nuclear ribonucleoprotein A1 (hnRNP A1) (Helix-destabilizing protein) (Single-strand RNA-binding protein) (hnRNP core protein A1)	HNRNPA1 HNRPA1	Homo sapiens (Human)	372
HPV-31_E1^E4	P07910	HNRPC	0.00489152	0.820211	0.191397	0.384293	ME6.16,ME7.16,ME8.5,ME9.3	HNRPC_HUMAN	reviewed	Heterogeneous nuclear ribonucleoproteins C1/C2 (hnRNP C1/C2)	HNRNPC HNRPC	Homo sapiens (Human)	306
HPV-31_E2	P09651	ROA1	0.00680215	0.964715	0.125357	0.383618	ME5.20,ME6.19,ME7.21,ME8.9,ME9.9	ROA1_HUMAN	reviewed	Heterogeneous nuclear ribonucleoprotein A1 (hnRNP A1) (Helix-destabilizing protein) (Single-strand RNA-binding protein) (hnRNP core protein A1)	HNRNPA1 HNRPA1	Homo sapiens (Human)	372
HPV-31_L2	P62906	RL10A	0.00401058	0.955316	0.129557	0.38358	ME5.22,ME6.21,ME7.20,ME8.7,ME9.7	RL10A_HUMAN	reviewed	60S ribosomal protein L10a (CSA-19) (Neural precursor cell expressed developmentally down-regulated protein 6) (NEDD-6)	RPL10A NEDD6	Homo sapiens (Human)	217
HPV-31_E2	Q9UN86	G3BP2	0.00509951	0.976346	0.119628	0.383269	ME5.20,ME6.19,ME7.21,ME8.9,ME9.9	G3BP2_HUMAN	reviewed	Ras GTPase-activating protein-binding protein 2 (G3BP-2) (GAP SH3 domain-binding protein 2)	G3BP2 KIAA0660	Homo sapiens (Human)	482
HPV-31_E6	Q14671	PUM1	6.47494e-05	6.21335e-11	0.559051	0.383236	ME9.5	PUM1_HUMAN	reviewed	Pumilio homolog 1 (HsPUM) (Pumilio-1)	PUM1 KIAA0099 PUMH1	Homo sapiens (Human)	1186
HPV-31_E1	P43307	SSRA	0.000114239	6.21335e-11	0.558558	0.382898	ME7.23	SSRA_HUMAN	reviewed	Translocon-associated protein subunit alpha (TRAP-alpha) (Signal sequence receptor subunit alpha) (SSR-alpha)	SSR1 TRAPA PSEC0262	Homo sapiens (Human)	286
HPV-31_E1	Q06787	FMR1	5.17342e-05	6.21335e-11	0.558558	0.382897	ME7.23	FMR1_HUMAN	reviewed	Fragile X mental retardation protein 1 (FMRP) (Protein FMR-1)	FMR1	Homo sapiens (Human)	632
HPV-31_E2	P62241	RS8	0.0133274	0.966526	0.123323	0.382821	ME5.20,ME6.19,ME7.21,ME8.9,ME9.9	RS8_HUMAN	reviewed	40S ribosomal protein S8	RPS8 OK/SW-cl.83	Homo sapiens (Human)	208
HPV-31_E7	P41743	KPCI	6.64479e-05	6.21335e-11	0.558409	0.382795	ME6.23	KPCI_HUMAN	reviewed	Protein kinase C iota type (EC 2.7.11.13) (Atypical protein kinase C-lambda/iota) (PRKC-lambda/iota) (aPKC-lambda/iota) (nPKC-iota)	PRKCI DXS1179E	Homo sapiens (Human)	596
HPV-31_E7	Q92615	LAR4B	5.6281e-05	6.21335e-11	0.558409	0.382795	ME6.23	LAR4B_HUMAN	reviewed	La-related protein 4B (La ribonucleoprotein domain family member 4B) (La ribonucleoprotein domain family member 5) (La-related protein 5)	LARP4B KIAA0217 LARP5	Homo sapiens (Human)	738
HPV-31_E8^E2C	P25398	RS12	0.00549829	0.989618	0.112856	0.382723	ME5.15,ME6.15,ME7.15,ME8.4,ME9.2	RS12_HUMAN	reviewed	40S ribosomal protein S12	RPS12	Homo sapiens (Human)	132
HPV-31_E2	P36578	RL4	0.00905417	0.945698	0.132449	0.382625	ME5.20,ME6.19,ME7.21,ME8.9,ME9.9	RL4_HUMAN	reviewed	60S ribosomal protein L4 (60S ribosomal protein L1)	RPL4 RPL1	Homo sapiens (Human)	427
HPV-31_E8^E2C	Q07020	RL18	0.00896916	0.944458	0.13289	0.382545	ME5.15,ME6.15,ME7.15,ME8.4,ME9.2	RL18_HUMAN	reviewed	60S ribosomal protein L18	RPL18	Homo sapiens (Human)	188
HPV-31_E8^E2C	P62249	RS16	0.00977617	0.981819	0.1158	0.382361	ME5.15,ME6.15,ME7.15,ME8.4,ME9.2	RS16_HUMAN	reviewed	40S ribosomal protein S16	RPS16	Homo sapiens (Human)	146
HPV-31_L2	P05388	RLA0	0.00429696	0.985206	0.11429	0.382338	ME5.22,ME6.21,ME7.20,ME8.7,ME9.7	RLA0_HUMAN	reviewed	60S acidic ribosomal protein P0 (60S ribosomal protein L10E)	RPLP0	Homo sapiens (Human)	317
HPV-31_L1	P62269	RS18	0.0120099	0.987199	0.113102	0.382185	ME5.23,ME6.20,ME7.22,ME8.10,ME9.12	RS18_HUMAN	reviewed	40S ribosomal protein S18 (Ke-3) (Ke3)	RPS18 D6S218E	Homo sapiens (Human)	152
HPV-31_L2	P15880	RS2	0.00727356	0.991238	0.111202	0.3821	ME5.22,ME6.21,ME7.20,ME8.7,ME9.7	RS2_HUMAN	reviewed	40S ribosomal protein S2 (40S ribosomal protein S4) (Protein LLRep3)	RPS2 RPS4	Homo sapiens (Human)	293
HPV-31_E1^E4	P26196	DDX6	0.0125002	0.990754	0.111214	0.38199	ME5.17,ME6.16,ME7.16,ME8.5,ME9.3	DDX6_HUMAN	reviewed	Probable ATP-dependent RNA helicase DDX6 (EC 3.6.4.13) (ATP-dependent RNA helicase p54) (DEAD box protein 6) (Oncogene RCK)	DDX6 HLR2 RCK	Homo sapiens (Human)	483
HPV-31_E6	P68363	TBA1B	0.0173105	0.971832	0.119171	0.381636	ME5.18,ME6.17,ME7.18,ME8.2,ME9.5	TBA1B_HUMAN	reviewed	Tubulin alpha-1B chain (Alpha-tubulin ubiquitous) (Tubulin K-alpha-1) (Tubulin alpha-ubiquitous chain)	TUBA1B	Homo sapiens (Human)	451
HPV-31_E5	P84090	ERH	0.00638273	0.959142	0.123958	0.380936	ME5.14,ME6.18,ME7.17,ME8.6,ME9.6	ERH_HUMAN	reviewed	Enhancer of rudimentary homolog	ERH	Homo sapiens (Human)	104
HPV-31_L2	P68363	TBA1B	0.0168046	0.976903	0.115689	0.38081	ME5.22,ME6.21,ME7.20,ME8.7,ME9.7	TBA1B_HUMAN	reviewed	Tubulin alpha-1B chain (Alpha-tubulin ubiquitous) (Tubulin K-alpha-1) (Tubulin alpha-ubiquitous chain)	TUBA1B	Homo sapiens (Human)	451
HPV-31_L2	P62249	RS16	0.0102754	0.990541	0.109549	0.380769	ME5.22,ME6.21,ME7.20,ME8.7,ME9.7	RS16_HUMAN	reviewed	40S ribosomal protein S16	RPS16	Homo sapiens (Human)	146
HPV-31_E8^E2C	P16403	H12	0.0134517	0.946231	0.129042	0.38048	ME5.15,ME6.15,ME7.15,ME8.4,ME9.2	H12_HUMAN	reviewed	Histone H1.2 (Histone H1c) (Histone H1d) (Histone H1s-1)	HIST1H1C H1F2	Homo sapiens (Human)	213
HPV-31_E6	Q8IZP0	ABI1	0.00126596	0.848288	0.172602	0.38005	ME5.18,ME7.18,ME8.2,ME9.5	ABI1_HUMAN	reviewed	Abl interactor 1 (Abelson interactor 1) (Abi-1) (Abl-binding protein 4) (AblBP4) (Eps8 SH3 domain-binding protein) (Eps8-binding protein) (Nap1-binding protein) (Nap1BP) (Spectrin SH3 domain-binding protein 1) (e3B1)	ABI1 SSH3BP1	Homo sapiens (Human)	508
HPV-31_E7	Q5T2N8	ATD3C	0.00029793	6.21335e-11	0.553739	0.379595	ME9.8	ATD3C_HUMAN	reviewed	ATPase family AAA domain-containing protein 3C	ATAD3C	Homo sapiens (Human)	411
HPV-31_E2	Q07020	RL18	0.00841014	0.950864	0.125648	0.379553	ME5.20,ME6.19,ME7.21,ME8.9,ME9.9	RL18_HUMAN	reviewed	60S ribosomal protein L18	RPL18	Homo sapiens (Human)	188
HPV-31_L2	P62753	RS6	0.00713702	0.988564	0.108507	0.379427	ME5.22,ME6.21,ME7.20,ME8.7,ME9.7	RS6_HUMAN	reviewed	40S ribosomal protein S6 (Phosphoprotein NP33)	RPS6 OK/SW-cl.2	Homo sapiens (Human)	249
HPV-31_E8^E2C	Q7Z417	NUFP2	0.00818484	0.966116	0.118552	0.379393	ME5.15,ME6.15,ME7.15,ME8.4,ME9.2	NUFP2_HUMAN	reviewed	Nuclear fragile X mental retardation-interacting protein 2 (82 kDa FMRP-interacting protein) (82-FIP) (Cell proliferation-inducing gene 1 protein) (FMRP-interacting protein 2)	NUFIP2 KIAA1321 PIG1	Homo sapiens (Human)	695
HPV-31_E1^E4	P06899	H2B1J	0.0120731	0.664755	0.253984	0.379277	ME6.16,ME8.5,ME9.3	H2B1J_HUMAN	reviewed	Histone H2B type 1-J (Histone H2B.1) (Histone H2B.r) (H2B/r)	HIST1H2BJ H2BFR	Homo sapiens (Human)	126
HPV-31_E1	P62913	RL11	0.00620434	0.946118	0.127381	0.379264	ME5.21,ME6.22,ME7.23,ME8.11,ME9.10	RL11_HUMAN	reviewed	60S ribosomal protein L11 (CLL-associated antigen KW-12)	RPL11	Homo sapiens (Human)	178
HPV-31_L2	P61254	RL26	0.00542668	0.943116	0.128565	0.379144	ME5.22,ME6.21,ME7.20,ME8.7,ME9.7	RL26_HUMAN	reviewed	60S ribosomal protein L26	RPL26	Homo sapiens (Human)	145
HPV-31_E1^E4	P52272	HNRPM	0.00470462	0.920903	0.138568	0.379144	ME5.17,ME6.16,ME7.16,ME8.5,ME9.3	HNRPM_HUMAN	reviewed	Heterogeneous nuclear ribonucleoprotein M (hnRNP M)	HNRNPM HNRPM NAGR1	Homo sapiens (Human)	730
HPV-31_L2	P62913	RL11	0.00600639	0.974405	0.114181	0.378941	ME5.22,ME6.21,ME7.20,ME8.7,ME9.7	RL11_HUMAN	reviewed	60S ribosomal protein L11 (CLL-associated antigen KW-12)	RPL11	Homo sapiens (Human)	178
HPV-31_E8^E2C	P50914	RL14	0.00576569	0.932091	0.132996	0.378782	ME5.15,ME6.15,ME7.15,ME8.4,ME9.2	RL14_HUMAN	reviewed	60S ribosomal protein L14 (CAG-ISL 7)	RPL14	Homo sapiens (Human)	215
HPV-31_E2	P16403	H12	0.012121	0.965705	0.11778	0.378761	ME5.20,ME6.19,ME7.21,ME8.9,ME9.9	H12_HUMAN	reviewed	Histone H1.2 (Histone H1c) (Histone H1d) (Histone H1s-1)	HIST1H1C H1F2	Homo sapiens (Human)	213
HPV-31_E2	P84090	ERH	0.0060837	0.936282	0.13079	0.378566	ME5.20,ME6.19,ME7.21,ME8.9,ME9.9	ERH_HUMAN	reviewed	Enhancer of rudimentary homolog	ERH	Homo sapiens (Human)	104
HPV-31_E6	P05023	AT1A1	6.96854e-05	6.21335e-11	0.552192	0.378533	ME7.18	AT1A1_HUMAN	reviewed	Sodium/potassium-transporting ATPase subunit alpha-1 (Na(+)/K(+) ATPase alpha-1 subunit) (EC 3.6.3.9) (Sodium pump subunit alpha-1)	ATP1A1	Homo sapiens (Human)	1023
HPV-31_E1	P50914	RL14	0.00607435	0.924815	0.135652	0.37836	ME5.21,ME6.22,ME7.23,ME8.11,ME9.10	RL14_HUMAN	reviewed	60S ribosomal protein L14 (CAG-ISL 7)	RPL14	Homo sapiens (Human)	215
HPV-31_L1	Q01844	EWS	5.23782e-05	6.21335e-11	0.551881	0.378321	ME7.22	EWS_HUMAN	reviewed	RNA-binding protein EWS (EWS oncogene) (Ewing sarcoma breakpoint region 1 protein)	EWSR1 EWS	Homo sapiens (Human)	656
HPV-31_E5	O00232	PSD12	0.000385076	0.418866	0.363357	0.37832	ME7.17,ME9.6	PSD12_HUMAN	reviewed	26S proteasome non-ATPase regulatory subunit 12 (26S proteasome regulatory subunit RPN5) (26S proteasome regulatory subunit p55)	PSMD12	Homo sapiens (Human)	456
HPV-31_E1^E4	P09874	PARP1	0.000111638	6.21335e-11	0.551708	0.378202	ME9.3	PARP1_HUMAN	reviewed	Poly [ADP-ribose] polymerase 1 (PARP-1) (EC 2.4.2.30) (ADP-ribosyltransferase diphtheria toxin-like 1) (ARTD1) (NAD(+) ADP-ribosyltransferase 1) (ADPRT 1) (Poly[ADP-ribose] synthase 1)	PARP1 ADPRT PPOL	Homo sapiens (Human)	1014
HPV-31_E6	P62714	PP2AB	0.00143595	0.652699	0.257689	0.378034	ME5.18,ME8.2,ME9.5	PP2AB_HUMAN	reviewed	Serine/threonine-protein phosphatase 2A catalytic subunit beta isoform (PP2A-beta) (EC 3.1.3.16)	PPP2CB	Homo sapiens (Human)	309
HPV-31_E8^E2C	P10412	H14	0.01318	0.946231	0.125472	0.378032	ME5.15,ME6.15,ME7.15,ME8.4,ME9.2	H14_HUMAN	reviewed	Histone H1.4 (Histone H1b) (Histone H1s-4)	HIST1H1E H1F4	Homo sapiens (Human)	219
HPV-31_E2	Q7L576	CYFP1	0.00228034	0.885666	0.152689	0.377938	ME5.20,ME6.19,ME7.21,ME8.9,ME9.9	CYFP1_HUMAN	reviewed	Cytoplasmic FMR1-interacting protein 1 (Specifically Rac1-associated protein 1) (Sra-1) (p140sra-1)	CYFIP1 KIAA0068	Homo sapiens (Human)	1253
HPV-31_L1	P62917	RL8	0.0048239	0.963365	0.11769	0.377933	ME5.23,ME6.20,ME7.22,ME8.10,ME9.12	RL8_HUMAN	reviewed	60S ribosomal protein L8	RPL8	Homo sapiens (Human)	257
HPV-31_E5	P25398	RS12	0.007379	0.905413	0.143614	0.37784	ME5.14,ME6.18,ME7.17,ME8.6,ME9.6	RS12_HUMAN	reviewed	40S ribosomal protein S12	RPS12	Homo sapiens (Human)	132
HPV-31_E2	P83731	RL24	0.0101487	0.836742	0.174456	0.377812	ME5.20,ME6.19,ME7.21,ME8.9,ME9.9	RL24_HUMAN	reviewed	60S ribosomal protein L24 (60S ribosomal protein L30)	RPL24	Homo sapiens (Human)	157
HPV-31_E5	P31943	HNRH1	0.00332073	0.961633	0.118296	0.377806	ME5.14,ME6.18,ME7.17,ME8.6,ME9.6	HNRH1_HUMAN	reviewed	Heterogeneous nuclear ribonucleoprotein H (hnRNP H) [Cleaved into: Heterogeneous nuclear ribonucleoprotein H, N-terminally processed]	HNRNPH1 HNRPH HNRPH1	Homo sapiens (Human)	449
HPV-31_E5	P08107	HSP71	0.0272508	0.88662	0.151752	0.377739	ME5.14,ME6.18,ME7.17,ME8.6,ME9.6	HSP71_HUMAN	reviewed	Heat shock 70 kDa protein 1A/1B (Heat shock 70 kDa protein 1/2) (HSP70-1/HSP70-2) (HSP70.1/HSP70.2)	HSPA1A HSPA1; HSPA1B	Homo sapiens (Human)	641
HPV-31_L1	P43243	MATR3	0.00124637	0.910896	0.140846	0.377597	ME5.23,ME6.20,ME7.22,ME8.10,ME9.12	MATR3_HUMAN	reviewed	Matrin-3	MATR3 KIAA0723	Homo sapiens (Human)	847
HPV-31_E5	Q92600	RCD1	0.000244117	6.21335e-11	0.550759	0.377552	ME9.6	RCD1_HUMAN	reviewed	Cell differentiation protein RCD1 homolog (Rcd-1) (CCR4-NOT transcription complex subunit 9)	RQCD1 CNOT9 RCD1	Homo sapiens (Human)	299
HPV-31_E5	P11021	GRP78	0.0133179	0.845848	0.169874	0.377499	ME5.14,ME6.18,ME7.17,ME8.6,ME9.6	GRP78_HUMAN	reviewed	78 kDa glucose-regulated protein (GRP-78) (Endoplasmic reticulum lumenal Ca(2+)-binding protein grp78) (Heat shock 70 kDa protein 5) (Immunoglobulin heavy chain-binding protein) (BiP)	HSPA5 GRP78	Homo sapiens (Human)	654
HPV-31_L1	O60506	HNRPQ	0.00389994	0.848503	0.16862	0.377403	ME6.20,ME7.22,ME8.10,ME9.12	HNRPQ_HUMAN	reviewed	Heterogeneous nuclear ribonucleoprotein Q (hnRNP Q) (Glycine- and tyrosine-rich RNA-binding protein) (GRY-RBP) (NS1-associated protein 1) (Synaptotagmin-binding, cytoplasmic RNA-interacting protein)	SYNCRIP HNRPQ NSAP1	Homo sapiens (Human)	623
HPV-31_E5	Q8WWM7	ATX2L	0.0122218	0.990776	0.10381	0.37692	ME5.14,ME6.18,ME7.17,ME8.6,ME9.6	ATX2L_HUMAN	reviewed	Ataxin-2-like protein (Ataxin-2 domain protein) (Ataxin-2-related protein)	ATXN2L A2D A2LG A2LP A2RP	Homo sapiens (Human)	1075
HPV-31_E2	P07900	HS90A	0.00196657	0.900309	0.144058	0.376537	ME5.20,ME6.19,ME7.21,ME8.9,ME9.9	HS90A_HUMAN	reviewed	Heat shock protein HSP 90-alpha (Heat shock 86 kDa) (HSP 86) (HSP86) (Renal carcinoma antigen NY-REN-38)	HSP90AA1 HSP90A HSPC1 HSPCA	Homo sapiens (Human)	732
HPV-31_E2	P10412	H14	0.0118762	0.965705	0.114481	0.376498	ME5.20,ME6.19,ME7.21,ME8.9,ME9.9	H14_HUMAN	reviewed	Histone H1.4 (Histone H1b) (Histone H1s-4)	HIST1H1E H1F4	Homo sapiens (Human)	219
HPV-31_E8^E2C	Q9UNE7	CHIP	0.00116113	0.421689	0.359361	0.376456	ME7.15,ME9.2	CHIP_HUMAN	reviewed	E3 ubiquitin-protein ligase CHIP (EC 6.3.2.-) (Antigen NY-CO-7) (CLL-associated antigen KW-8) (Carboxy terminus of Hsp70-interacting protein) (STIP1 homology and U box-containing protein 1)	STUB1 CHIP PP1131	Homo sapiens (Human)	303
HPV-31_L2	Q9BYJ9	YTHD1	0.000143511	6.21335e-11	0.549138	0.376441	ME7.20	YTHD1_HUMAN	reviewed	YTH domain family protein 1 (Dermatomyositis associated with cancer putative autoantigen 1) (DACA-1)	YTHDF1 C20orf21	Homo sapiens (Human)	559
HPV-31_E2	P19338	NUCL	0.00989528	0.94558	0.122755	0.375948	ME5.20,ME6.19,ME7.21,ME8.9,ME9.9	NUCL_HUMAN	reviewed	Nucleolin (Protein C23)	NCL	Homo sapiens (Human)	710
HPV-31_E8^E2C	P11498	PYC	0.0152724	0.927784	0.130313	0.375671	ME5.15,ME6.15,ME7.15,ME8.4,ME9.2	PYC_HUMAN	reviewed	Pyruvate carboxylase, mitochondrial (EC 6.4.1.1) (Pyruvic carboxylase) (PCB)	PC	Homo sapiens (Human)	1178
HPV-31_L2	P07437	TBB5	0.0196613	0.987185	0.10327	0.375486	ME5.22,ME6.21,ME7.20,ME8.7,ME9.7	TBB5_HUMAN	reviewed	Tubulin beta chain (Tubulin beta-5 chain)	TUBB TUBB5 OK/SW-cl.56	Homo sapiens (Human)	444
HPV-31_L2	P62269	RS18	0.0108503	0.989749	0.102182	0.375478	ME5.22,ME6.21,ME7.20,ME8.7,ME9.7	RS18_HUMAN	reviewed	40S ribosomal protein S18 (Ke-3) (Ke3)	RPS18 D6S218E	Homo sapiens (Human)	152
HPV-31_E1^E4	Q15717	ELAV1	0.00452069	0.923236	0.131875	0.375275	ME5.17,ME6.16,ME7.16,ME8.5,ME9.3	ELAV1_HUMAN	reviewed	ELAV-like protein 1 (Hu-antigen R) (HuR)	ELAVL1 HUR	Homo sapiens (Human)	326
HPV-31_L1	Q08211	DHX9	0.0025513	0.840843	0.16897	0.375271	ME6.20,ME7.22,ME8.10,ME9.12	DHX9_HUMAN	reviewed	ATP-dependent RNA helicase A (RHA) (EC 3.6.4.13) (DEAH box protein 9) (Leukophysin) (LKP) (Nuclear DNA helicase II) (NDH II)	DHX9 DDX9 LKP NDH2	Homo sapiens (Human)	1270
HPV-31_E6	P07437	TBB5	0.0206332	0.974516	0.108375	0.375082	ME5.18,ME6.17,ME7.18,ME8.2,ME9.5	TBB5_HUMAN	reviewed	Tubulin beta chain (Tubulin beta-5 chain)	TUBB TUBB5 OK/SW-cl.56	Homo sapiens (Human)	444
HPV-31_L2	P16401	H15	0.0044217	0.961928	0.114155	0.375065	ME5.22,ME6.21,ME7.20,ME8.7,ME9.7	H15_HUMAN	reviewed	Histone H1.5 (Histone H1a) (Histone H1b) (Histone H1s-3)	HIST1H1B H1F5	Homo sapiens (Human)	226
HPV-31_E8^E2C	P47914	RL29	0.00390402	0.959188	0.115088	0.374855	ME5.15,ME6.15,ME7.15,ME8.4,ME9.2	RL29_HUMAN	reviewed	60S ribosomal protein L29 (Cell surface heparin-binding protein HIP)	RPL29	Homo sapiens (Human)	159
HPV-31_L2	P47756	CAPZB	0.00017434	6.21335e-11	0.546703	0.374771	ME9.7	CAPZB_HUMAN	reviewed	F-actin-capping protein subunit beta (CapZ beta)	CAPZB	Homo sapiens (Human)	277
HPV-31_E1	P62847	RS24	0.00545171	0.972371	0.108405	0.374351	ME5.21,ME6.22,ME7.23,ME8.11,ME9.10	RS24_HUMAN	reviewed	40S ribosomal protein S24	RPS24	Homo sapiens (Human)	133
HPV-31_E5	P11142	HSP7C	0.0372879	0.892288	0.14407	0.374281	ME5.14,ME6.18,ME7.17,ME8.6,ME9.6	HSP7C_HUMAN	reviewed	Heat shock cognate 71 kDa protein (Heat shock 70 kDa protein 8)	HSPA8 HSC70 HSP73 HSPA10	Homo sapiens (Human)	646
HPV-31_E1^E4	Q7L576	CYFP1	0.00190849	0.945513	0.120368	0.374244	ME5.17,ME6.16,ME7.16,ME8.5,ME9.3	CYFP1_HUMAN	reviewed	Cytoplasmic FMR1-interacting protein 1 (Specifically Rac1-associated protein 1) (Sra-1) (p140sra-1)	CYFIP1 KIAA0068	Homo sapiens (Human)	1253
HPV-31_E2	Q8WWM7	ATX2L	0.0120156	0.964144	0.11147	0.373953	ME5.20,ME6.19,ME7.21,ME8.9,ME9.9	ATX2L_HUMAN	reviewed	Ataxin-2-like protein (Ataxin-2 domain protein) (Ataxin-2-related protein)	ATXN2L A2D A2LG A2LP A2RP	Homo sapiens (Human)	1075
HPV-31_E1^E4	P11940	PABP1	0.0107787	0.982614	0.102986	0.373828	ME5.17,ME6.16,ME7.16,ME8.5,ME9.3	PABP1_HUMAN	reviewed	Polyadenylate-binding protein 1 (PABP-1) (Poly(A)-binding protein 1)	PABPC1 PAB1 PABP1 PABPC2	Homo sapiens (Human)	636
HPV-31_E7	P83916	CBX1	0.000698144	0.657275	0.249449	0.373793	ME6.23,ME7.19,ME9.8	CBX1_HUMAN	reviewed	Chromobox protein homolog 1 (HP1Hsbeta) (Heterochromatin protein 1 homolog beta) (HP1 beta) (Heterochromatin protein p25) (M31) (Modifier 1 protein) (p25beta)	CBX1 CBX	Homo sapiens (Human)	185
HPV-31_E8^E2C	P62829	RL23	0.0126462	0.936415	0.123612	0.373725	ME5.15,ME6.15,ME7.15,ME8.4,ME9.2	RL23_HUMAN	reviewed	60S ribosomal protein L23 (60S ribosomal protein L17)	RPL23	Homo sapiens (Human)	140
HPV-31_E1^E4	P31943	HNRH1	0.00303962	0.95096	0.117135	0.373715	ME5.17,ME6.16,ME7.16,ME8.5,ME9.3	HNRH1_HUMAN	reviewed	Heterogeneous nuclear ribonucleoprotein H (hnRNP H) [Cleaved into: Heterogeneous nuclear ribonucleoprotein H, N-terminally processed]	HNRNPH1 HNRPH HNRPH1	Homo sapiens (Human)	449
HPV-31_L2	P83731	RL24	0.00799255	0.959206	0.11321	0.373598	ME5.22,ME6.21,ME7.20,ME8.7,ME9.7	RL24_HUMAN	reviewed	60S ribosomal protein L24 (60S ribosomal protein L30)	RPL24	Homo sapiens (Human)	157
HPV-31_E1^E4	O00479	HMGN4	0.00133446	6.21335e-11	0.544973	0.373593	ME9.3	HMGN4_HUMAN	reviewed	High mobility group nucleosome-binding domain-containing protein 4 (Non-histone chromosomal protein HMG-17-like 3) (Non-histone chromosomal protein)	HMGN4 HMG17L3 NHC	Homo sapiens (Human)	90
HPV-31_L1	P49207	RL34	0.006298	0.855404	0.159492	0.373288	ME6.20,ME7.22,ME8.10,ME9.12	RL34_HUMAN	reviewed	60S ribosomal protein L34	RPL34	Homo sapiens (Human)	117
HPV-31_E8^E2C	P62424	RL7A	0.00711372	0.923941	0.128582	0.37325	ME5.15,ME6.15,ME7.15,ME8.4,ME9.2	RL7A_HUMAN	reviewed	60S ribosomal protein L7a (PLA-X polypeptide) (Surfeit locus protein 3)	RPL7A SURF-3 SURF3	Homo sapiens (Human)	266
HPV-31_E1^E4	Q00839	HNRPU	0.00363111	0.968482	0.108294	0.373064	ME5.17,ME6.16,ME7.16,ME8.5,ME9.3	HNRPU_HUMAN	reviewed	Heterogeneous nuclear ribonucleoprotein U (hnRNP U) (Scaffold attachment factor A) (SAF-A) (p120) (pp120)	HNRNPU HNRPU SAFA U21.1	Homo sapiens (Human)	825
HPV-31_E7	Q9Y5Y2	NUBP2	0.000157243	6.21335e-11	0.543969	0.372897	ME6.23	NUBP2_HUMAN	reviewed	Cytosolic Fe-S cluster assembly factor NUBP2 (Nucleotide-binding protein 2) (NBP 2)	NUBP2	Homo sapiens (Human)	271
HPV-31_E8^E2C	P22626	ROA2	0.00851257	0.977416	0.10397	0.372886	ME5.15,ME6.15,ME7.15,ME8.4,ME9.2	ROA2_HUMAN	reviewed	Heterogeneous nuclear ribonucleoproteins A2/B1 (hnRNP A2/B1)	HNRNPA2B1 HNRPA2B1	Homo sapiens (Human)	353
HPV-31_E1	Q12834	CDC20	0.000428713	0.429651	0.350399	0.372765	ME7.23,ME8.11	CDC20_HUMAN	reviewed	Cell division cycle protein 20 homolog (p55CDC)	CDC20	Homo sapiens (Human)	499
HPV-31_E7	O14925	TIM23	0.000158432	6.21335e-11	0.543757	0.372751	ME7.19	TIM23_HUMAN	reviewed	Mitochondrial import inner membrane translocase subunit Tim23	TIMM23 TIM23	Homo sapiens (Human)	209
HPV-31_E7	P31153	METK2	7.96161e-05	6.21335e-11	0.543757	0.372751	ME7.19	METK2_HUMAN	reviewed	S-adenosylmethionine synthase isoform type-2 (AdoMet synthase 2) (EC 2.5.1.6) (Methionine adenosyltransferase 2) (MAT 2) (Methionine adenosyltransferase II) (MAT-II)	MAT2A AMS2 MATA2	Homo sapiens (Human)	395
HPV-31_L1	P46777	RL5	0.00417691	0.824134	0.172707	0.372687	ME6.20,ME7.22,ME8.10,ME9.12	RL5_HUMAN	reviewed	60S ribosomal protein L5	RPL5 MSTP030	Homo sapiens (Human)	297
HPV-31_E6	P04908	H2A1B	0.00669056	0.888512	0.143614	0.372621	ME5.18,ME6.17,ME7.18,ME8.2,ME9.5	H2A1B_HUMAN	reviewed	Histone H2A type 1-B/E (Histone H2A.2) (Histone H2A/a) (Histone H2A/m)	HIST1H2AB H2AFM; HIST1H2AE H2AFA	Homo sapiens (Human)	130
HPV-31_E5	Q3MHD2	LSM12	0.0167057	0.90877	0.134365	0.372591	ME5.14,ME6.18,ME7.17,ME8.6,ME9.6	LSM12_HUMAN	reviewed	Protein LSM12 homolog	LSM12	Homo sapiens (Human)	195
HPV-31_L1	P46778	RL21	0.0059054	0.867366	0.15274	0.372348	ME5.23,ME6.20,ME7.22,ME8.10,ME9.12	RL21_HUMAN	reviewed	60S ribosomal protein L21	RPL21	Homo sapiens (Human)	160
HPV-31_L2	Q13509	TBB3	0.00995298	0.853528	0.158675	0.372172	ME5.22,ME6.21,ME7.20,ME9.7	TBB3_HUMAN	reviewed	Tubulin beta-3 chain (Tubulin beta-4 chain) (Tubulin beta-III)	TUBB3 TUBB4	Homo sapiens (Human)	450
HPV-31_E8^E2C	Q8WWM7	ATX2L	0.00993924	0.99716	0.0940178	0.372163	ME5.15,ME6.15,ME7.15,ME8.4,ME9.2	ATX2L_HUMAN	reviewed	Ataxin-2-like protein (Ataxin-2 domain protein) (Ataxin-2-related protein)	ATXN2L A2D A2LG A2LP A2RP	Homo sapiens (Human)	1075
HPV-31_L2	P08107	HSP71	0.0208507	0.947273	0.116112	0.371982	ME5.22,ME6.21,ME7.20,ME8.7,ME9.7	HSP71_HUMAN	reviewed	Heat shock 70 kDa protein 1A/1B (Heat shock 70 kDa protein 1/2) (HSP70-1/HSP70-2) (HSP70.1/HSP70.2)	HSPA1A HSPA1; HSPA1B	Homo sapiens (Human)	641
HPV-31_E1	Q9NVI7	ATD3A	0.00099976	0.412606	0.356712	0.371837	ME7.23,ME9.10	ATD3A_HUMAN	reviewed	ATPase family AAA domain-containing protein 3A	ATAD3A	Homo sapiens (Human)	634
HPV-31_E1^E4	P68104	EF1A1	0.00484999	0.996878	0.0936068	0.371764	ME5.17,ME6.16,ME7.16,ME8.5,ME9.3	EF1A1_HUMAN	reviewed	Elongation factor 1-alpha 1 (EF-1-alpha-1) (Elongation factor Tu) (EF-Tu) (Eukaryotic elongation factor 1 A-1) (eEF1A-1) (Leukocyte receptor cluster member 7)	EEF1A1 EEF1A EF1A LENG7	Homo sapiens (Human)	462
HPV-31_E1	P62269	RS18	0.0122407	0.931744	0.122581	0.371574	ME5.21,ME6.22,ME7.23,ME8.11,ME9.10	RS18_HUMAN	reviewed	40S ribosomal protein S18 (Ke-3) (Ke3)	RPS18 D6S218E	Homo sapiens (Human)	152
HPV-31_E5	P34931	HS71L	0.0132088	0.881148	0.1453	0.371544	ME5.14,ME6.18,ME7.17,ME8.6,ME9.6	HS71L_HUMAN	reviewed	Heat shock 70 kDa protein 1-like (Heat shock 70 kDa protein 1L) (Heat shock 70 kDa protein 1-Hom) (HSP70-Hom)	HSPA1L	Homo sapiens (Human)	641
HPV-31_E6	Q9BUT9	F195A	0.00306581	0.855912	0.156639	0.371471	ME5.18,ME7.18,ME8.2,ME9.5	F195A_HUMAN	reviewed	Protein FAM195A	FAM195A C16orf14	Homo sapiens (Human)	160
HPV-31_E2	P62424	RL7A	0.00516971	0.987493	0.0968463	0.371091	ME5.20,ME6.19,ME7.21,ME8.9,ME9.9	RL7A_HUMAN	reviewed	60S ribosomal protein L7a (PLA-X polypeptide) (Surfeit locus protein 3)	RPL7A SURF-3 SURF3	Homo sapiens (Human)	266
HPV-31_E1	Q00839	HNRPU	0.00300924	0.997327	0.0914429	0.370408	ME5.21,ME6.22,ME7.23,ME8.11,ME9.10	HNRPU_HUMAN	reviewed	Heterogeneous nuclear ribonucleoprotein U (hnRNP U) (Scaffold attachment factor A) (SAF-A) (p120) (pp120)	HNRNPU HNRPU SAFA U21.1	Homo sapiens (Human)	825
HPV-31_E1^E4	P16403	H12	0.0105631	0.977503	0.100201	0.370341	ME5.17,ME6.16,ME7.16,ME8.5,ME9.3	H12_HUMAN	reviewed	Histone H1.2 (Histone H1c) (Histone H1d) (Histone H1s-1)	HIST1H1C H1F2	Homo sapiens (Human)	213
HPV-31_E1^E4	P62753	RS6	0.00568208	0.988406	0.0952888	0.370308	ME5.17,ME6.16,ME7.16,ME8.5,ME9.3	RS6_HUMAN	reviewed	40S ribosomal protein S6 (Phosphoprotein NP33)	RPS6 OK/SW-cl.2	Homo sapiens (Human)	249
HPV-31_E7	Q13263	TIF1B	0.000933282	0.550199	0.292388	0.370193	ME6.23,ME7.19,ME9.8	TIF1B_HUMAN	reviewed	Transcription intermediary factor 1-beta (TIF1-beta) (E3 SUMO-protein ligase TRIM28) (EC 6.3.2.-) (KRAB-associated protein 1) (KAP-1) (KRAB-interacting protein 1) (KRIP-1) (Nuclear corepressor KAP-1) (RING finger protein 96) (Tripartite motif-containing protein 28)	TRIM28 KAP1 RNF96 TIF1B	Homo sapiens (Human)	835
HPV-31_L2	P39023	RL3	0.00456542	0.991181	0.0934411	0.369891	ME5.22,ME6.21,ME7.20,ME8.7,ME9.7	RL3_HUMAN	reviewed	60S ribosomal protein L3 (HIV-1 TAR RNA-binding protein B) (TARBP-B)	RPL3 OK/SW-cl.32	Homo sapiens (Human)	403
HPV-31_E5	Q13200	PSMD2	0.000568382	0.669574	0.238044	0.369769	ME6.18,ME7.17,ME9.6	PSMD2_HUMAN	reviewed	26S proteasome non-ATPase regulatory subunit 2 (26S proteasome regulatory subunit RPN1) (26S proteasome regulatory subunit S2) (26S proteasome subunit p97) (Protein 55.11) (Tumor necrosis factor type 1 receptor-associated protein 2)	PSMD2 TRAP2	Homo sapiens (Human)	908
HPV-31_E5	O75607	NPM3	0.000630011	6.21335e-11	0.539145	0.369593	ME8.6	NPM3_HUMAN	reviewed	Nucleoplasmin-3	NPM3	Homo sapiens (Human)	178
HPV-31_E1^E4	Q8WVX9	FACR1	6.84174e-05	6.21335e-11	0.539098	0.369558	ME7.16	FACR1_HUMAN	reviewed	Fatty acyl-CoA reductase 1 (EC 1.2.1.n2) (Male sterility domain-containing protein 2)	FAR1 MLSTD2 UNQ2423/PRO4981	Homo sapiens (Human)	515
HPV-31_E1^E4	Q9NY65	TBA8	0.00674159	0.816043	0.171682	0.369504	ME5.17,ME6.16,ME7.16,ME9.3	TBA8_HUMAN	reviewed	Tubulin alpha-8 chain (Alpha-tubulin 8) (Tubulin alpha chain-like 2)	TUBA8 TUBAL2	Homo sapiens (Human)	449
HPV-31_E8^E2C	Q00577	PURA	0.000120134	6.21335e-11	0.538941	0.36945	ME7.15	PURA_HUMAN	reviewed	Transcriptional activator protein Pur-alpha (Purine-rich single-stranded DNA-binding protein alpha)	PURA PUR1	Homo sapiens (Human)	322
HPV-31_E5	P09651	ROA1	0.00720937	0.931479	0.119604	0.369422	ME5.14,ME6.18,ME7.17,ME8.6,ME9.6	ROA1_HUMAN	reviewed	Heterogeneous nuclear ribonucleoprotein A1 (hnRNP A1) (Helix-destabilizing protein) (Single-strand RNA-binding protein) (hnRNP core protein A1)	HNRNPA1 HNRPA1	Homo sapiens (Human)	372
HPV-31_E5	P05198	IF2A	0.000112175	6.21335e-11	0.538535	0.369172	ME7.17	IF2A_HUMAN	reviewed	Eukaryotic translation initiation factor 2 subunit 1 (Eukaryotic translation initiation factor 2 subunit alpha) (eIF-2-alpha) (eIF-2A) (eIF-2alpha)	EIF2S1 EIF2A	Homo sapiens (Human)	315
HPV-31_E2	P07437	TBB5	0.018059	0.969385	0.101891	0.369039	ME5.20,ME6.19,ME7.21,ME8.9,ME9.9	TBB5_HUMAN	reviewed	Tubulin beta chain (Tubulin beta-5 chain)	TUBB TUBB5 OK/SW-cl.56	Homo sapiens (Human)	444
HPV-31_L2	P36578	RL4	0.00710576	0.990758	0.0918815	0.368707	ME5.22,ME6.21,ME7.20,ME8.7,ME9.7	RL4_HUMAN	reviewed	60S ribosomal protein L4 (60S ribosomal protein L1)	RPL4 RPL1	Homo sapiens (Human)	427
HPV-31_L1	P62241	RS8	0.0128402	0.966899	0.102481	0.368646	ME5.23,ME6.20,ME7.22,ME8.10,ME9.12	RS8_HUMAN	reviewed	40S ribosomal protein S8	RPS8 OK/SW-cl.83	Homo sapiens (Human)	208
HPV-31_L1	P46782	RS5	0.00351715	0.844463	0.156927	0.368138	ME6.20,ME7.22,ME8.10,ME9.12	RS5_HUMAN	reviewed	40S ribosomal protein S5 [Cleaved into: 40S ribosomal protein S5, N-terminally processed]	RPS5	Homo sapiens (Human)	204
HPV-31_E1^E4	P51991	ROA3	0.00388584	0.833842	0.161563	0.368041	ME6.16,ME7.16,ME8.5,ME9.3	ROA3_HUMAN	reviewed	Heterogeneous nuclear ribonucleoprotein A3 (hnRNP A3)	HNRNPA3 HNRPA3	Homo sapiens (Human)	378
HPV-31_E8^E2C	Q3MHD2	LSM12	0.0117581	0.957988	0.105073	0.367667	ME5.15,ME6.15,ME7.15,ME8.4,ME9.2	LSM12_HUMAN	reviewed	Protein LSM12 homolog	LSM12	Homo sapiens (Human)	195
HPV-31_E1^E4	Q8WWM7	ATX2L	0.0101941	0.979132	0.0954294	0.36757	ME5.17,ME6.16,ME7.16,ME8.5,ME9.3	ATX2L_HUMAN	reviewed	Ataxin-2-like protein (Ataxin-2 domain protein) (Ataxin-2-related protein)	ATXN2L A2D A2LG A2LP A2RP	Homo sapiens (Human)	1075
HPV-31_E1^E4	P84098	RL19	0.00302729	0.955835	0.105837	0.367474	ME5.17,ME6.16,ME7.16,ME8.5,ME9.3	RL19_HUMAN	reviewed	60S ribosomal protein L19	RPL19	Homo sapiens (Human)	196
HPV-31_E1^E4	P42677	RS27	0.00823913	0.947961	0.109091	0.367307	ME5.17,ME6.16,ME7.16,ME8.5,ME9.3	RS27_HUMAN	reviewed	40S ribosomal protein S27 (Metallopan-stimulin 1) (MPS-1)	RPS27 MPS1	Homo sapiens (Human)	84
HPV-31_L2	P62424	RL7A	0.00555706	0.986162	0.0918609	0.367265	ME5.22,ME6.21,ME7.20,ME8.7,ME9.7	RL7A_HUMAN	reviewed	60S ribosomal protein L7a (PLA-X polypeptide) (Surfeit locus protein 3)	RPL7A SURF-3 SURF3	Homo sapiens (Human)	266
HPV-31_L2	P61313	RL15	0.0032817	0.961353	0.102574	0.366941	ME5.22,ME6.21,ME7.20,ME8.7,ME9.7	RL15_HUMAN	reviewed	60S ribosomal protein L15	RPL15 EC45 TCBAP0781	Homo sapiens (Human)	204
HPV-31_L1	Q7L7L0	H2A3	0.00172404	6.21335e-11	0.535206	0.366899	ME8.10	H2A3_HUMAN	reviewed	Histone H2A type 3	HIST3H2A	Homo sapiens (Human)	130
HPV-31_L1	Q93077	H2A1C	0.00172404	6.21335e-11	0.535206	0.366899	ME8.10	H2A1C_HUMAN	reviewed	Histone H2A type 1-C (Histone H2A/l)	HIST1H2AC H2AFL	Homo sapiens (Human)	130
HPV-31_E1^E4	P26373	RL13	0.0046399	0.952053	0.106531	0.366793	ME5.17,ME6.16,ME7.16,ME8.5,ME9.3	RL13_HUMAN	reviewed	60S ribosomal protein L13 (Breast basic conserved protein 1)	RPL13 BBC1 OK/SW-cl.46	Homo sapiens (Human)	211
HPV-31_E1^E4	P38646	GRP75	0.00819939	0.971047	0.0977401	0.366648	ME5.17,ME6.16,ME7.16,ME8.5,ME9.3	GRP75_HUMAN	reviewed	Stress-70 protein, mitochondrial (75 kDa glucose-regulated protein) (GRP-75) (Heat shock 70 kDa protein 9) (Mortalin) (MOT) (Peptide-binding protein 74) (PBP74)	HSPA9 GRP75 HSPA9B	Homo sapiens (Human)	679
HPV-31_E6	Q3ZCM7	TBB8	0.00596469	0.836651	0.158099	0.366546	ME5.18,ME6.17,ME8.2,ME9.5	TBB8_HUMAN	reviewed	Tubulin beta-8 chain	TUBB8	Homo sapiens (Human)	444
HPV-31_E1^E4	P61353	RL27	0.00308057	0.984988	0.09126	0.366476	ME5.17,ME6.16,ME7.16,ME8.5,ME9.3	RL27_HUMAN	reviewed	60S ribosomal protein L27	RPL27	Homo sapiens (Human)	136
HPV-31_E6	P42677	RS27	0.00942125	0.952711	0.105607	0.366391	ME5.18,ME6.17,ME7.18,ME8.2,ME9.5	RS27_HUMAN	reviewed	40S ribosomal protein S27 (Metallopan-stimulin 1) (MPS-1)	RPS27 MPS1	Homo sapiens (Human)	84
HPV-31_E1	Q96C55	ZN524	0.000236712	6.21335e-11	0.534285	0.366259	ME9.10	ZN524_HUMAN	reviewed	Zinc finger protein 524	ZNF524	Homo sapiens (Human)	264
HPV-31_E8^E2C	P62805	H4	0.0185259	0.813952	0.167758	0.366239	ME5.15,ME6.15,ME7.15,ME8.4,ME9.2	H4_HUMAN	reviewed	Histone H4	HIST1H4A H4/A H4FA; HIST1H4B H4/I H4FI; HIST1H4C H4/G H4FG; HIST1H4D H4/B H4FB; HIST1H4E H4/J H4FJ;	Homo sapiens (Human)	103
HPV-31_E1^E4	P10412	H14	0.00994861	0.978646	0.0936823	0.366221	ME5.17,ME6.16,ME7.16,ME8.5,ME9.3	H14_HUMAN	reviewed	Histone H1.4 (Histone H1b) (Histone H1s-4)	HIST1H1E H1F4	Homo sapiens (Human)	219
HPV-31_L1	Q9Y3U8	RL36	0.00407167	0.754466	0.194521	0.366146	ME6.20,ME7.22,ME8.10,ME9.12	RL36_HUMAN	reviewed	60S ribosomal protein L36	RPL36	Homo sapiens (Human)	105
HPV-31_L1	P11940	PABP1	0.0102862	0.983672	0.0910766	0.365988	ME5.23,ME6.20,ME7.22,ME8.10,ME9.12	PABP1_HUMAN	reviewed	Polyadenylate-binding protein 1 (PABP-1) (Poly(A)-binding protein 1)	PABPC1 PAB1 PABP1 PABPC2	Homo sapiens (Human)	636
HPV-31_L1	Q9UN86	G3BP2	0.004904	0.9593	0.102052	0.36596	ME5.23,ME6.20,ME7.22,ME8.10,ME9.12	G3BP2_HUMAN	reviewed	Ras GTPase-activating protein-binding protein 2 (G3BP-2) (GAP SH3 domain-binding protein 2)	G3BP2 KIAA0660	Homo sapiens (Human)	482
HPV-31_E6	Q8WWM7	ATX2L	0.010351	0.990022	0.0879198	0.365783	ME5.18,ME6.17,ME7.18,ME8.2,ME9.5	ATX2L_HUMAN	reviewed	Ataxin-2-like protein (Ataxin-2 domain protein) (Ataxin-2-related protein)	ATXN2L A2D A2LG A2LP A2RP	Homo sapiens (Human)	1075
HPV-31_E2	P23396	RS3	0.00615202	0.952823	0.104627	0.365734	ME5.20,ME6.19,ME7.21,ME8.9,ME9.9	RS3_HUMAN	reviewed	40S ribosomal protein S3	RPS3 OK/SW-cl.26	Homo sapiens (Human)	243
HPV-31_E1	P36578	RL4	0.00840971	0.920967	0.118415	0.365371	ME5.21,ME6.22,ME7.23,ME8.11,ME9.10	RL4_HUMAN	reviewed	60S ribosomal protein L4 (60S ribosomal protein L1)	RPL4 RPL1	Homo sapiens (Human)	427
HPV-31_E1^E4	P22626	ROA2	0.00874119	0.94633	0.106981	0.36536	ME5.17,ME6.16,ME7.16,ME8.5,ME9.3	ROA2_HUMAN	reviewed	Heterogeneous nuclear ribonucleoproteins A2/B1 (hnRNP A2/B1)	HNRNPA2B1 HNRPA2B1	Homo sapiens (Human)	353
HPV-31_E1^E4	P25705	ATPA	0.00104258	0.952718	0.104153	0.365346	ME5.17,ME6.16,ME7.16,ME8.5,ME9.3	ATPA_HUMAN	reviewed	ATP synthase subunit alpha, mitochondrial	ATP5A1 ATP5A ATP5AL2 ATPM	Homo sapiens (Human)	553
HPV-31_L2	P18124	RL7	0.0042837	0.986647	0.088846	0.365341	ME5.22,ME6.21,ME7.20,ME8.7,ME9.7	RL7_HUMAN	reviewed	60S ribosomal protein L7	RPL7	Homo sapiens (Human)	248
HPV-31_E5	P48741	HSP77	0.00817856	0.885207	0.134325	0.365243	ME5.14,ME6.18,ME7.17,ME8.6,ME9.6	HSP77_HUMAN	reviewed	Putative heat shock 70 kDa protein 7 (Heat shock 70 kDa protein B)	HSPA7 HSP70B	Homo sapiens (Human)	367
HPV-31_L1	P62899	RL31	0.00933691	0.937684	0.110652	0.365212	ME5.23,ME6.20,ME7.22,ME8.10,ME9.12	RL31_HUMAN	reviewed	60S ribosomal protein L31	RPL31	Homo sapiens (Human)	125
HPV-31_E1^E4	P16402	H13	0.00718252	0.822905	0.162276	0.365176	ME6.16,ME7.16,ME8.5,ME9.3	H13_HUMAN	reviewed	Histone H1.3 (Histone H1c) (Histone H1s-2)	HIST1H1D H1F3	Homo sapiens (Human)	221
HPV-31_E2	P62829	RL23	0.0112953	0.934193	0.111885	0.364992	ME5.20,ME6.19,ME7.21,ME8.9,ME9.9	RL23_HUMAN	reviewed	60S ribosomal protein L23 (60S ribosomal protein L17)	RPL23	Homo sapiens (Human)	140
HPV-31_L1	P39019	RS19	0.00446867	0.809298	0.168107	0.364958	ME6.20,ME7.22,ME8.10,ME9.12	RS19_HUMAN	reviewed	40S ribosomal protein S19	RPS19	Homo sapiens (Human)	145
HPV-31_E1^E4	P39023	RL3	0.00388886	0.989103	0.0870043	0.364834	ME5.17,ME6.16,ME7.16,ME8.5,ME9.3	RL3_HUMAN	reviewed	60S ribosomal protein L3 (HIV-1 TAR RNA-binding protein B) (TARBP-B)	RPL3 OK/SW-cl.32	Homo sapiens (Human)	403
HPV-31_L2	P62917	RL8	0.00395985	0.967547	0.0966095	0.364768	ME5.22,ME6.21,ME7.20,ME8.7,ME9.7	RL8_HUMAN	reviewed	60S ribosomal protein L8	RPL8	Homo sapiens (Human)	257
HPV-31_E7	P62913	RL11	0.00500727	0.970585	0.095188	0.364737	ME5.19,ME6.23,ME7.19,ME8.8,ME9.8	RL11_HUMAN	reviewed	60S ribosomal protein L11 (CLL-associated antigen KW-12)	RPL11	Homo sapiens (Human)	178
HPV-31_E8^E2C	P68363	TBA1B	0.0133399	0.959102	0.100043	0.364572	ME5.15,ME6.15,ME7.15,ME8.4,ME9.2	TBA1B_HUMAN	reviewed	Tubulin alpha-1B chain (Alpha-tubulin ubiquitous) (Tubulin K-alpha-1) (Tubulin alpha-ubiquitous chain)	TUBA1B	Homo sapiens (Human)	451
HPV-31_E5	P17066	HSP76	0.00879961	0.882449	0.134483	0.364504	ME5.14,ME6.18,ME7.17,ME8.6,ME9.6	HSP76_HUMAN	reviewed	Heat shock 70 kDa protein 6 (Heat shock 70 kDa protein B')	HSPA6 HSP70B'	Homo sapiens (Human)	643
HPV-31_E1	P18124	RL7	0.00485136	0.944011	0.106664	0.364404	ME5.21,ME6.22,ME7.23,ME8.11,ME9.10	RL7_HUMAN	reviewed	60S ribosomal protein L7	RPL7	Homo sapiens (Human)	248
HPV-31_E1	P62424	RL7A	0.00522219	0.97447	0.0929057	0.364372	ME5.21,ME6.22,ME7.23,ME8.11,ME9.10	RL7A_HUMAN	reviewed	60S ribosomal protein L7a (PLA-X polypeptide) (Surfeit locus protein 3)	RPL7A SURF-3 SURF3	Homo sapiens (Human)	266
HPV-31_L1	O00425	IF2B3	0.00320836	0.808148	0.167749	0.364351	ME6.20,ME7.22,ME8.10,ME9.12	IF2B3_HUMAN	reviewed	Insulin-like growth factor 2 mRNA-binding protein 3 (IGF2 mRNA-binding protein 3) (IMP-3) (IGF-II mRNA-binding protein 3) (KH domain-containing protein overexpressed in cancer) (hKOC) (VICKZ family member 3)	IGF2BP3 IMP3 KOC1 VICKZ3	Homo sapiens (Human)	579
HPV-31_E2	P08865	RSSA	0.00328024	0.758121	0.190049	0.364203	ME5.20,ME7.21,ME8.9,ME9.9	RSSA_HUMAN	reviewed	40S ribosomal protein SA (37 kDa laminin receptor precursor) (37LRP) (37/67 kDa laminin receptor) (LRP/LR) (67 kDa laminin receptor) (67LR) (Colon carcinoma laminin-binding protein) (Laminin receptor 1) (LamR) (Laminin-binding protein precursor p40) (LBP/p40) (Multidrug resistance-associated protein MGr1-Ag) (NEM/1CHD4)	RPSA LAMBR LAMR1	Homo sapiens (Human)	295
HPV-31_E1	P16403	H12	0.0109451	0.950277	0.10345	0.36417	ME5.21,ME6.22,ME7.23,ME8.11,ME9.10	H12_HUMAN	reviewed	Histone H1.2 (Histone H1c) (Histone H1d) (Histone H1s-1)	HIST1H1C H1F2	Homo sapiens (Human)	213
HPV-31_L1	P61978	HNRPK	0.00315981	0.824025	0.16026	0.364115	ME6.20,ME7.22,ME8.10,ME9.12	HNRPK_HUMAN	reviewed	Heterogeneous nuclear ribonucleoprotein K (hnRNP K) (Transformation up-regulated nuclear protein) (TUNP)	HNRNPK HNRPK	Homo sapiens (Human)	463
HPV-31_E2	P38646	GRP75	0.00944581	0.934012	0.110654	0.364082	ME5.20,ME6.19,ME7.21,ME8.9,ME9.9	GRP75_HUMAN	reviewed	Stress-70 protein, mitochondrial (75 kDa glucose-regulated protein) (GRP-75) (Heat shock 70 kDa protein 9) (Mortalin) (MOT) (Peptide-binding protein 74) (PBP74)	HSPA9 GRP75 HSPA9B	Homo sapiens (Human)	679
HPV-31_E1	P38646	GRP75	0.00867602	0.951058	0.102837	0.363978	ME5.21,ME6.22,ME7.23,ME8.11,ME9.10	GRP75_HUMAN	reviewed	Stress-70 protein, mitochondrial (75 kDa glucose-regulated protein) (GRP-75) (Heat shock 70 kDa protein 9) (Mortalin) (MOT) (Peptide-binding protein 74) (PBP74)	HSPA9 GRP75 HSPA9B	Homo sapiens (Human)	679
HPV-31_L2	Q7Z417	NUFP2	0.0066282	0.990377	0.0847706	0.363712	ME5.22,ME6.21,ME7.20,ME8.7,ME9.7	NUFP2_HUMAN	reviewed	Nuclear fragile X mental retardation-interacting protein 2 (82 kDa FMRP-interacting protein) (82-FIP) (Cell proliferation-inducing gene 1 protein) (FMRP-interacting protein 2)	NUFIP2 KIAA1321 PIG1	Homo sapiens (Human)	695
HPV-31_E2	Q15717	ELAV1	0.00481546	0.851361	0.147346	0.363706	ME6.19,ME7.21,ME8.9,ME9.9	ELAV1_HUMAN	reviewed	ELAV-like protein 1 (Hu-antigen R) (HuR)	ELAVL1 HUR	Homo sapiens (Human)	326
HPV-31_E1^E4	Q9UN86	G3BP2	0.00475735	0.936866	0.108703	0.363597	ME5.17,ME6.16,ME7.16,ME8.5,ME9.3	G3BP2_HUMAN	reviewed	Ras GTPase-activating protein-binding protein 2 (G3BP-2) (GAP SH3 domain-binding protein 2)	G3BP2 KIAA0660	Homo sapiens (Human)	482
HPV-31_L1	O00571	DDX3X	0.00295639	0.612472	0.254499	0.363445	ME7.22,ME8.10,ME9.12	DDX3X_HUMAN	reviewed	ATP-dependent RNA helicase DDX3X (EC 3.6.4.13) (DEAD box protein 3, X-chromosomal) (DEAD box, X isoform) (Helicase-like protein 2) (HLP2)	DDX3X DBX DDX3	Homo sapiens (Human)	662
HPV-31_E8^E2C	Q8IXM3	RM41	0.00120787	0.389273	0.354799	0.363328	ME7.15,ME9.2	RM41_HUMAN	reviewed	39S ribosomal protein L41, mitochondrial (L41mt) (MRP-L41) (39S ribosomal protein L27 homolog) (Bcl-2-interacting mitochondrial ribosomal protein L41) (Cell proliferation-inducing gene 3 protein) (MRP-L27 homolog)	MRPL41 BMRP MRPL27 RPML27 PIG3	Homo sapiens (Human)	137
HPV-31_L2	Q00839	HNRPU	0.00306606	0.991112	0.0839107	0.363328	ME5.22,ME6.21,ME7.20,ME8.7,ME9.7	HNRPU_HUMAN	reviewed	Heterogeneous nuclear ribonucleoprotein U (hnRNP U) (Scaffold attachment factor A) (SAF-A) (p120) (pp120)	HNRNPU HNRPU SAFA U21.1	Homo sapiens (Human)	825
HPV-31_E2	P62249	RS16	0.00937475	0.929105	0.111576	0.363199	ME5.20,ME6.19,ME7.21,ME8.9,ME9.9	RS16_HUMAN	reviewed	40S ribosomal protein S16	RPS16	Homo sapiens (Human)	146
HPV-31_E8^E2C	Q9Y2A7	NCKP1	0.00110918	0.80235	0.168434	0.363019	ME6.15,ME7.15,ME8.4,ME9.2	NCKP1_HUMAN	reviewed	Nck-associated protein 1 (NAP 1) (Membrane-associated protein HEM-2) (p125Nap1)	NCKAP1 HEM2 KIAA0587 NAP1	Homo sapiens (Human)	1128
HPV-31_E1	P84090	ERH	0.00486246	0.949841	0.102002	0.363007	ME5.21,ME6.22,ME7.23,ME8.11,ME9.10	ERH_HUMAN	reviewed	Enhancer of rudimentary homolog	ERH	Homo sapiens (Human)	104
HPV-31_L2	P11021	GRP78	0.00795334	0.950912	0.101448	0.362976	ME5.22,ME6.21,ME7.20,ME8.7,ME9.7	GRP78_HUMAN	reviewed	78 kDa glucose-regulated protein (GRP-78) (Endoplasmic reticulum lumenal Ca(2+)-binding protein grp78) (Heat shock 70 kDa protein 5) (Immunoglobulin heavy chain-binding protein) (BiP)	HSPA5 GRP78	Homo sapiens (Human)	654
HPV-31_L2	Q9NY65	TBA8	0.0064818	0.838961	0.151692	0.362869	ME6.21,ME7.20,ME8.7,ME9.7	TBA8_HUMAN	reviewed	Tubulin alpha-8 chain (Alpha-tubulin 8) (Tubulin alpha chain-like 2)	TUBA8 TUBAL2	Homo sapiens (Human)	449
HPV-31_E6	P62158	CALM	0.00756959	0.811726	0.163898	0.36284	ME5.18,ME6.17,ME7.18,ME8.2,ME9.5	CALM_HUMAN	reviewed	Calmodulin (CaM)	CALM1 CALM CAM CAM1; CALM2 CAM2 CAMB; CALM3 CALML2 CAM3 CAMC CAMIII	Homo sapiens (Human)	149
HPV-31_E1^E4	P62995	TRA2B	0.000790473	0.680797	0.222709	0.36272	ME6.16,ME7.16,ME8.5	TRA2B_HUMAN	reviewed	Transformer-2 protein homolog beta (TRA-2 beta) (TRA2-beta) (hTRA2-beta) (Splicing factor, arginine/serine-rich 10) (Transformer-2 protein homolog B)	TRA2B SFRS10	Homo sapiens (Human)	288
HPV-31_E1^E4	P47914	RL29	0.00286352	0.991494	0.0828537	0.36272	ME5.17,ME6.16,ME7.16,ME8.5,ME9.3	RL29_HUMAN	reviewed	60S ribosomal protein L29 (Cell surface heparin-binding protein HIP)	RPL29	Homo sapiens (Human)	159
HPV-31_E1	P07437	TBB5	0.0159766	0.965349	0.0944819	0.362703	ME5.21,ME6.22,ME7.23,ME8.11,ME9.10	TBB5_HUMAN	reviewed	Tubulin beta chain (Tubulin beta-5 chain)	TUBB TUBB5 OK/SW-cl.56	Homo sapiens (Human)	444
HPV-31_E6	P22061	PIMT	0.00434202	0.843635	0.149301	0.36266	ME5.18,ME6.17,ME7.18,ME8.2,ME9.5	PIMT_HUMAN	reviewed	Protein-L-isoaspartate(D-aspartate) O-methyltransferase (PIMT) (EC 2.1.1.77) (L-isoaspartyl protein carboxyl methyltransferase) (Protein L-isoaspartyl/D-aspartyl methyltransferase) (Protein-beta-aspartate methyltransferase)	PCMT1	Homo sapiens (Human)	227
HPV-31_E7	P63173	RL38	0.00549542	0.678572	0.223553	0.36264	ME6.23,ME7.19,ME9.8	RL38_HUMAN	reviewed	60S ribosomal protein L38	RPL38	Homo sapiens (Human)	70
HPV-31_E8^E2C	P46776	RL27A	0.0048054	0.84326	0.149216	0.362488	ME5.15,ME7.15,ME8.4,ME9.2	RL27A_HUMAN	reviewed	60S ribosomal protein L27a	RPL27A	Homo sapiens (Human)	148
HPV-31_E6	P68104	EF1A1	0.00488172	0.985007	0.0853823	0.362464	ME5.18,ME6.17,ME7.18,ME8.2,ME9.5	EF1A1_HUMAN	reviewed	Elongation factor 1-alpha 1 (EF-1-alpha-1) (Elongation factor Tu) (EF-Tu) (Eukaryotic elongation factor 1 A-1) (eEF1A-1) (Leukocyte receptor cluster member 7)	EEF1A1 EEF1A EF1A LENG7	Homo sapiens (Human)	462
HPV-31_E1	P68104	EF1A1	0.00536251	0.946884	0.102485	0.362429	ME5.21,ME6.22,ME7.23,ME8.11,ME9.10	EF1A1_HUMAN	reviewed	Elongation factor 1-alpha 1 (EF-1-alpha-1) (Elongation factor Tu) (EF-Tu) (Eukaryotic elongation factor 1 A-1) (eEF1A-1) (Leukocyte receptor cluster member 7)	EEF1A1 EEF1A EF1A LENG7	Homo sapiens (Human)	462
HPV-31_L2	P62241	RS8	0.010828	0.981719	0.0864209	0.362197	ME5.22,ME6.21,ME7.20,ME8.7,ME9.7	RS8_HUMAN	reviewed	40S ribosomal protein S8	RPS8 OK/SW-cl.83	Homo sapiens (Human)	208
HPV-31_E5	P81605	DCD	0.00622447	0.839082	0.150567	0.362134	ME5.14,ME6.18,ME8.6,ME9.6	DCD_HUMAN	reviewed	Dermcidin (EC 3.4.-.-) (Preproteolysin) [Cleaved into: Survival-promoting peptide; DCD-1]	DCD AIDD DSEP	Homo sapiens (Human)	110
HPV-31_E1	P10412	H14	0.010724	0.950277	0.100251	0.361976	ME5.21,ME6.22,ME7.23,ME8.11,ME9.10	H14_HUMAN	reviewed	Histone H1.4 (Histone H1b) (Histone H1s-4)	HIST1H1E H1F4	Homo sapiens (Human)	219
HPV-31_E1	P26196	DDX6	0.0114443	0.944469	0.102786	0.361926	ME5.21,ME6.22,ME7.23,ME8.11,ME9.10	DDX6_HUMAN	reviewed	Probable ATP-dependent RNA helicase DDX6 (EC 3.6.4.13) (ATP-dependent RNA helicase p54) (DEAD box protein 6) (Oncogene RCK)	DDX6 HLR2 RCK	Homo sapiens (Human)	483
HPV-31_E2	Q3MHD2	LSM12	0.0124273	0.926884	0.110393	0.361721	ME5.20,ME6.19,ME7.21,ME8.9,ME9.9	LSM12_HUMAN	reviewed	Protein LSM12 homolog	LSM12	Homo sapiens (Human)	195
HPV-31_E1	Q8WWM7	ATX2L	0.0109089	0.946669	0.101442	0.36168	ME5.21,ME6.22,ME7.23,ME8.11,ME9.10	ATX2L_HUMAN	reviewed	Ataxin-2-like protein (Ataxin-2 domain protein) (Ataxin-2-related protein)	ATXN2L A2D A2LG A2LP A2RP	Homo sapiens (Human)	1075
HPV-31_E2	P61353	RL27	0.00461428	0.857599	0.141397	0.361551	ME5.20,ME6.19,ME7.21,ME8.9	RL27_HUMAN	reviewed	60S ribosomal protein L27	RPL27	Homo sapiens (Human)	136
HPV-31_E1	P19338	NUCL	0.0092288	0.922282	0.112127	0.361471	ME5.21,ME6.22,ME7.23,ME8.11,ME9.10	NUCL_HUMAN	reviewed	Nucleolin (Protein C23)	NCL	Homo sapiens (Human)	710
HPV-31_E8^E2C	P11142	HSP7C	0.025428	0.932606	0.107323	0.36146	ME5.15,ME6.15,ME7.15,ME8.4,ME9.2	HSP7C_HUMAN	reviewed	Heat shock cognate 71 kDa protein (Heat shock 70 kDa protein 8)	HSPA8 HSC70 HSP73 HSPA10	Homo sapiens (Human)	646
HPV-31_E5	P38646	GRP75	0.00980665	0.935521	0.105943	0.361319	ME5.14,ME6.18,ME7.17,ME8.6,ME9.6	GRP75_HUMAN	reviewed	Stress-70 protein, mitochondrial (75 kDa glucose-regulated protein) (GRP-75) (Heat shock 70 kDa protein 9) (Mortalin) (MOT) (Peptide-binding protein 74) (PBP74)	HSPA9 GRP75 HSPA9B	Homo sapiens (Human)	679
HPV-31_L2	P38646	GRP75	0.00941767	0.944854	0.10174	0.361316	ME5.22,ME6.21,ME7.20,ME8.7,ME9.7	GRP75_HUMAN	reviewed	Stress-70 protein, mitochondrial (75 kDa glucose-regulated protein) (GRP-75) (Heat shock 70 kDa protein 9) (Mortalin) (MOT) (Peptide-binding protein 74) (PBP74)	HSPA9 GRP75 HSPA9B	Homo sapiens (Human)	679
HPV-31_L2	Q6PEY2	TBA3E	0.00648084	0.842345	0.147605	0.361112	ME6.21,ME7.20,ME8.7,ME9.7	TBA3E_HUMAN	reviewed	Tubulin alpha-3E chain (Alpha-tubulin 3E)	TUBA3E	Homo sapiens (Human)	450
HPV-31_E1	P47914	RL29	0.00317801	0.966762	0.091124	0.36076	ME5.21,ME6.22,ME7.23,ME8.11,ME9.10	RL29_HUMAN	reviewed	60S ribosomal protein L29 (Cell surface heparin-binding protein HIP)	RPL29	Homo sapiens (Human)	159
HPV-31_E8^E2C	P49207	RL34	0.00440226	0.846368	0.145052	0.360591	ME6.15,ME7.15,ME8.4,ME9.2	RL34_HUMAN	reviewed	60S ribosomal protein L34	RPL34	Homo sapiens (Human)	117
HPV-31_E8^E2C	P62701	RS4X	0.00830336	0.83668	0.149345	0.360568	ME5.15,ME7.15,ME8.4,ME9.2	RS4X_HUMAN	reviewed	40S ribosomal protein S4, X isoform (SCR10) (Single copy abundant mRNA protein)	RPS4X CCG2 RPS4 SCAR	Homo sapiens (Human)	263
HPV-31_E7	P62249	RS16	0.00832136	0.97134	0.0887162	0.360553	ME5.19,ME6.23,ME7.19,ME8.8,ME9.8	RS16_HUMAN	reviewed	40S ribosomal protein S16	RPS16	Homo sapiens (Human)	146
HPV-31_E8^E2C	Q9NZI8	IF2B1	0.002123	0.830444	0.152134	0.360519	ME6.15,ME7.15,ME8.4,ME9.2	IF2B1_HUMAN	reviewed	Insulin-like growth factor 2 mRNA-binding protein 1 (IGF2 mRNA-binding protein 1) (IMP-1) (Coding region determinant-binding protein) (CRD-BP) (IGF-II mRNA-binding protein 1) (VICKZ family member 1) (Zip code-binding protein 1) (ZBP-1) (Zipcode-binding protein 1)	IGF2BP1 CRDBP VICKZ1 ZBP1	Homo sapiens (Human)	577
HPV-31_L1	Q92522	H1X	0.00189551	0.611575	0.25063	0.36051	ME7.22,ME8.10,ME9.12	H1X_HUMAN	reviewed	Histone H1x	H1FX	Homo sapiens (Human)	213
HPV-31_L1	P14866	HNRPL	0.00186832	0.900453	0.120573	0.360482	ME5.23,ME6.20,ME7.22,ME8.10,ME9.12	HNRPL_HUMAN	reviewed	Heterogeneous nuclear ribonucleoprotein L (hnRNP L)	HNRNPL HNRPL P/OKcl.14	Homo sapiens (Human)	589
HPV-31_E7	P04350	TBB4A	0.0111585	0.926204	0.108828	0.360431	ME5.19,ME6.23,ME7.19,ME8.8,ME9.8	TBB4A_HUMAN	reviewed	Tubulin beta-4A chain (Tubulin 5 beta) (Tubulin beta-4 chain)	TUBB4A TUBB4 TUBB5	Homo sapiens (Human)	444
HPV-31_E6	Q13347	EIF3I	0.00193873	0.649763	0.233262	0.360386	ME5.18,ME7.18,ME9.5	EIF3I_HUMAN	reviewed	Eukaryotic translation initiation factor 3 subunit I (eIF3i) (Eukaryotic translation initiation factor 3 subunit 2) (TGF-beta receptor-interacting protein 1) (TRIP-1) (eIF-3-beta) (eIF3 p36)	EIF3I EIF3S2 TRIP1	Homo sapiens (Human)	325
HPV-31_L2	P16403	H12	0.0106086	0.964498	0.0911675	0.360136	ME5.22,ME6.21,ME7.20,ME8.7,ME9.7	H12_HUMAN	reviewed	Histone H1.2 (Histone H1c) (Histone H1d) (Histone H1s-1)	HIST1H1C H1F2	Homo sapiens (Human)	213
HPV-31_E2	P10301	RRAS	0.00193138	0.624832	0.243824	0.359934	ME5.20,ME8.9,ME9.9	RRAS_HUMAN	reviewed	Ras-related protein R-Ras (p23)	RRAS	Homo sapiens (Human)	218
HPV-31_E1^E4	P43243	MATR3	0.0014418	0.804186	0.162931	0.359815	ME6.16,ME7.16,ME8.5,ME9.3	MATR3_HUMAN	reviewed	Matrin-3	MATR3 KIAA0723	Homo sapiens (Human)	847
HPV-31_E2	P62280	RS11	0.00446897	0.852052	0.141236	0.359729	ME5.20,ME6.19,ME7.21,ME9.9	RS11_HUMAN	reviewed	40S ribosomal protein S11	RPS11	Homo sapiens (Human)	158
HPV-31_L1	P16403	H12	0.0123632	0.929456	0.106246	0.359672	ME5.23,ME6.20,ME7.22,ME8.10,ME9.12	H12_HUMAN	reviewed	Histone H1.2 (Histone H1c) (Histone H1d) (Histone H1s-1)	HIST1H1C H1F2	Homo sapiens (Human)	213
HPV-31_L2	P49411	EFTU	0.00186369	0.783806	0.171566	0.359449	ME6.21,ME7.20,ME8.7,ME9.7	EFTU_HUMAN	reviewed	Elongation factor Tu, mitochondrial (EF-Tu) (P43)	TUFM	Homo sapiens (Human)	452
HPV-31_E6	P62424	RL7A	0.00524306	0.972256	0.0866704	0.359415	ME5.18,ME6.17,ME7.18,ME8.2,ME9.5	RL7A_HUMAN	reviewed	60S ribosomal protein L7a (PLA-X polypeptide) (Surfeit locus protein 3)	RPL7A SURF-3 SURF3	Homo sapiens (Human)	266
HPV-31_E2	P68363	TBA1B	0.0119155	0.963696	0.0903251	0.359319	ME5.20,ME6.19,ME7.21,ME8.9,ME9.9	TBA1B_HUMAN	reviewed	Tubulin alpha-1B chain (Alpha-tubulin ubiquitous) (Tubulin K-alpha-1) (Tubulin alpha-ubiquitous chain)	TUBA1B	Homo sapiens (Human)	451
HPV-31_E2	P68104	EF1A1	0.00581706	0.921413	0.109314	0.359254	ME5.20,ME6.19,ME7.21,ME8.9,ME9.9	EF1A1_HUMAN	reviewed	Elongation factor 1-alpha 1 (EF-1-alpha-1) (Elongation factor Tu) (EF-Tu) (Eukaryotic elongation factor 1 A-1) (eEF1A-1) (Leukocyte receptor cluster member 7)	EEF1A1 EEF1A EF1A LENG7	Homo sapiens (Human)	462
HPV-31_E7	P62917	RL8	0.00350454	0.973921	0.0855011	0.359117	ME5.19,ME6.23,ME7.19,ME8.8,ME9.8	RL8_HUMAN	reviewed	60S ribosomal protein L8	RPL8	Homo sapiens (Human)	257
HPV-31_L1	Q9Y6M1	IF2B2	0.00118649	0.647565	0.232402	0.359114	ME7.22,ME8.10,ME9.12	IF2B2_HUMAN	reviewed	Insulin-like growth factor 2 mRNA-binding protein 2 (IGF2 mRNA-binding protein 2) (IMP-2) (Hepatocellular carcinoma autoantigen p62) (IGF-II mRNA-binding protein 2) (VICKZ family member 2)	IGF2BP2 IMP2 VICKZ2	Homo sapiens (Human)	599
HPV-31_E7	P39023	RL3	0.0042764	0.969318	0.0875255	0.359089	ME5.19,ME6.23,ME7.19,ME8.8,ME9.8	RL3_HUMAN	reviewed	60S ribosomal protein L3 (HIV-1 TAR RNA-binding protein B) (TARBP-B)	RPL3 OK/SW-cl.32	Homo sapiens (Human)	403
HPV-31_E2	P16401	H15	0.00558429	0.787725	0.168945	0.358883	ME5.20,ME6.19,ME7.21,ME9.9	H15_HUMAN	reviewed	Histone H1.5 (Histone H1a) (Histone H1b) (Histone H1s-3)	HIST1H1B H1F5	Homo sapiens (Human)	226
HPV-31_L2	P19338	NUCL	0.00703071	0.986959	0.0791769	0.358825	ME5.22,ME6.21,ME7.20,ME8.7,ME9.7	NUCL_HUMAN	reviewed	Nucleolin (Protein C23)	NCL	Homo sapiens (Human)	710
HPV-31_E1	P22626	ROA2	0.00739089	0.958289	0.0919749	0.358755	ME5.21,ME6.22,ME7.23,ME8.11,ME9.10	ROA2_HUMAN	reviewed	Heterogeneous nuclear ribonucleoproteins A2/B1 (hnRNP A2/B1)	HNRNPA2B1 HNRPA2B1	Homo sapiens (Human)	353
HPV-31_E8^E2C	C9JLW8	F195B	0.0352449	0.879867	0.126993	0.358731	ME5.15,ME6.15,ME7.15,ME8.4,ME9.2	F195B_HUMAN	reviewed	Protein FAM195B	FAM195B	Homo sapiens (Human)	97
HPV-31_E7	Q8WWM7	ATX2L	0.011612	0.943027	0.0986307	0.358634	ME5.19,ME6.23,ME7.19,ME8.8,ME9.8	ATX2L_HUMAN	reviewed	Ataxin-2-like protein (Ataxin-2 domain protein) (Ataxin-2-related protein)	ATXN2L A2D A2LG A2LP A2RP	Homo sapiens (Human)	1075
HPV-31_L2	P10412	H14	0.0103943	0.964498	0.0889016	0.358581	ME5.22,ME6.21,ME7.20,ME8.7,ME9.7	H14_HUMAN	reviewed	Histone H1.4 (Histone H1b) (Histone H1s-4)	HIST1H1E H1F4	Homo sapiens (Human)	219
HPV-31_L2	P36542	ATPG	0.00113835	0.641693	0.234265	0.358579	ME6.21,ME7.20,ME9.7	ATPG_HUMAN	reviewed	ATP synthase subunit gamma, mitochondrial (F-ATPase gamma subunit)	ATP5C1 ATP5C ATP5CL1	Homo sapiens (Human)	298
HPV-31_E5	Q6P158	DHX57	7.79716e-05	6.21335e-11	0.522891	0.358447	ME8.6	DHX57_HUMAN	reviewed	Putative ATP-dependent RNA helicase DHX57 (EC 3.6.4.13) (DEAH box protein 57)	DHX57	Homo sapiens (Human)	1386
HPV-31_L1	Q02878	RL6	0.00640968	0.816652	0.15512	0.358336	ME6.20,ME7.22,ME8.10,ME9.12	RL6_HUMAN	reviewed	60S ribosomal protein L6 (Neoplasm-related protein C140) (Tax-responsive enhancer element-binding protein 107) (TaxREB107)	RPL6 TXREB1	Homo sapiens (Human)	288
HPV-31_E1	Q7Z417	NUFP2	0.00584488	0.976056	0.0833815	0.358336	ME5.21,ME6.22,ME7.23,ME8.11,ME9.10	NUFP2_HUMAN	reviewed	Nuclear fragile X mental retardation-interacting protein 2 (82 kDa FMRP-interacting protein) (82-FIP) (Cell proliferation-inducing gene 1 protein) (FMRP-interacting protein 2)	NUFIP2 KIAA1321 PIG1	Homo sapiens (Human)	695
HPV-31_E7	Q96EP5	DAZP1	0.00518672	0.899964	0.117344	0.358137	ME5.19,ME6.23,ME7.19,ME8.8,ME9.8	DAZP1_HUMAN	reviewed	DAZ-associated protein 1 (Deleted in azoospermia-associated protein 1)	DAZAP1	Homo sapiens (Human)	407
HPV-31_E8^E2C	P05455	LA	0.000990537	0.668589	0.221435	0.358082	ME6.15,ME7.15,ME8.4	LA_HUMAN	reviewed	Lupus La protein (La autoantigen) (La ribonucleoprotein) (Sjoegren syndrome type B antigen) (SS-B)	SSB	Homo sapiens (Human)	408
HPV-31_L2	P42677	RS27	0.0101948	0.906227	0.114278	0.357998	ME5.22,ME6.21,ME7.20,ME8.7,ME9.7	RS27_HUMAN	reviewed	40S ribosomal protein S27 (Metallopan-stimulin 1) (MPS-1)	RPS27 MPS1	Homo sapiens (Human)	84
HPV-31_L1	Q02543	RL18A	0.00418067	0.784031	0.169114	0.357852	ME6.20,ME7.22,ME8.10,ME9.12	RL18A_HUMAN	reviewed	60S ribosomal protein L18a	RPL18A	Homo sapiens (Human)	176
HPV-31_L1	P26196	DDX6	0.0116293	0.950803	0.0939051	0.357793	ME5.23,ME6.20,ME7.22,ME8.10,ME9.12	DDX6_HUMAN	reviewed	Probable ATP-dependent RNA helicase DDX6 (EC 3.6.4.13) (ATP-dependent RNA helicase p54) (DEAD box protein 6) (Oncogene RCK)	DDX6 HLR2 RCK	Homo sapiens (Human)	483
HPV-31_L1	Q7L576	CYFP1	0.00178931	0.928064	0.103726	0.357451	ME5.23,ME6.20,ME7.22,ME8.10,ME9.12	CYFP1_HUMAN	reviewed	Cytoplasmic FMR1-interacting protein 1 (Specifically Rac1-associated protein 1) (Sra-1) (p140sra-1)	CYFIP1 KIAA0068	Homo sapiens (Human)	1253
HPV-31_E1^E4	P08107	HSP71	0.0155241	0.947158	0.0949253	0.357391	ME5.17,ME6.16,ME7.16,ME8.5,ME9.3	HSP71_HUMAN	reviewed	Heat shock 70 kDa protein 1A/1B (Heat shock 70 kDa protein 1/2) (HSP70-1/HSP70-2) (HSP70.1/HSP70.2)	HSPA1A HSPA1; HSPA1B	Homo sapiens (Human)	641
HPV-31_E1^E4	P17066	HSP76	0.00537085	0.959127	0.0896264	0.357391	ME5.17,ME6.16,ME7.16,ME8.5,ME9.3	HSP76_HUMAN	reviewed	Heat shock 70 kDa protein 6 (Heat shock 70 kDa protein B')	HSPA6 HSP70B'	Homo sapiens (Human)	643
HPV-31_E8^E2C	P62857	RS28	0.021701	0.797744	0.162054	0.357347	ME5.15,ME6.15,ME7.15,ME8.4,ME9.2	RS28_HUMAN	reviewed	40S ribosomal protein S28	RPS28	Homo sapiens (Human)	69
HPV-31_E2	P47914	RL29	0.00381713	0.907478	0.112816	0.357343	ME5.20,ME6.19,ME7.21,ME8.9,ME9.9	RL29_HUMAN	reviewed	60S ribosomal protein L29 (Cell surface heparin-binding protein HIP)	RPL29	Homo sapiens (Human)	159
HPV-31_E6	P05387	RLA2	0.00912408	0.832508	0.146307	0.357203	ME5.18,ME7.18,ME8.2,ME9.5	RLA2_HUMAN	reviewed	60S acidic ribosomal protein P2 (Renal carcinoma antigen NY-REN-44)	RPLP2 D11S2243E RPP2	Homo sapiens (Human)	115
HPV-31_L2	Q71U36	TBA1A	0.0120222	0.842165	0.14191	0.357186	ME6.21,ME7.20,ME8.7,ME9.7	TBA1A_HUMAN	reviewed	Tubulin alpha-1A chain (Alpha-tubulin 3) (Tubulin B-alpha-1) (Tubulin alpha-3 chain)	TUBA1A TUBA3	Homo sapiens (Human)	451
HPV-31_E8^E2C	P38646	GRP75	0.00720267	0.964915	0.0866538	0.35715	ME5.15,ME6.15,ME7.15,ME8.4,ME9.2	GRP75_HUMAN	reviewed	Stress-70 protein, mitochondrial (75 kDa glucose-regulated protein) (GRP-75) (Heat shock 70 kDa protein 9) (Mortalin) (MOT) (Peptide-binding protein 74) (PBP74)	HSPA9 GRP75 HSPA9B	Homo sapiens (Human)	679
HPV-31_E1	P84098	RL19	0.00240216	0.966762	0.0858585	0.357146	ME5.21,ME6.22,ME7.23,ME8.11,ME9.10	RL19_HUMAN	reviewed	60S ribosomal protein L19	RPL19	Homo sapiens (Human)	196
HPV-31_E7	P63167	DYL1	0.00282017	0.766337	0.176059	0.357145	ME6.23,ME7.19,ME8.8,ME9.8	DYL1_HUMAN	reviewed	Dynein light chain 1, cytoplasmic (8 kDa dynein light chain) (DLC8) (Dynein light chain LC8-type 1) (Protein inhibitor of neuronal nitric oxide synthase) (PIN)	DYNLL1 DLC1 DNCL1 DNCLC1 HDLC1	Homo sapiens (Human)	89
HPV-31_E1^E4	P61254	RL26	0.00487122	0.873866	0.127583	0.357103	ME5.17,ME6.16,ME7.16,ME8.5,ME9.3	RL26_HUMAN	reviewed	60S ribosomal protein L26	RPL26	Homo sapiens (Human)	145
HPV-31_E8^E2C	P07437	TBB5	0.013149	0.987247	0.0763023	0.35698	ME5.15,ME6.15,ME7.15,ME8.4,ME9.2	TBB5_HUMAN	reviewed	Tubulin beta chain (Tubulin beta-5 chain)	TUBB TUBB5 OK/SW-cl.56	Homo sapiens (Human)	444
HPV-31_L1	O75534	CSDE1	0.000142893	0.425517	0.328981	0.356805	ME7.22,ME9.12	CSDE1_HUMAN	reviewed	Cold shock domain-containing protein E1 (N-ras upstream gene protein) (Protein UNR)	CSDE1 D1S155E KIAA0885 NRU UNR	Homo sapiens (Human)	798
HPV-31_L1	Q6PKG0	LARP1	0.000852154	0.595753	0.252355	0.356804	ME6.20,ME7.22,ME9.12	LARP1_HUMAN	reviewed	La-related protein 1 (La ribonucleoprotein domain family member 1)	LARP1 KIAA0731 LARP	Homo sapiens (Human)	1096
HPV-31_E8^E2C	P18621	RL17	0.00355016	0.66453	0.221308	0.356758	ME5.15,ME7.15,ME9.2	RL17_HUMAN	reviewed	60S ribosomal protein L17 (60S ribosomal protein L23) (PD-1)	RPL17	Homo sapiens (Human)	184
HPV-31_E1^E4	O60814	H2B1K	0.0158478	0.894162	0.117785	0.356713	ME5.17,ME6.16,ME7.16,ME8.5,ME9.3	H2B1K_HUMAN	reviewed	Histone H2B type 1-K (H2B K) (HIRA-interacting protein 1)	HIST1H2BK H2BFT HIRIP1	Homo sapiens (Human)	126
HPV-31_L1	P05388	RLA0	0.00534499	0.840037	0.142165	0.356664	ME6.20,ME7.22,ME8.10,ME9.12	RLA0_HUMAN	reviewed	60S acidic ribosomal protein P0 (60S ribosomal protein L10E)	RPLP0	Homo sapiens (Human)	317
HPV-31_E8^E2C	Q9NUL3	STAU2	0.000133858	6.21335e-11	0.52028	0.356658	ME7.15	STAU2_HUMAN	reviewed	Double-stranded RNA-binding protein Staufen homolog 2	STAU2	Homo sapiens (Human)	570
HPV-31_E1	Q3MHD2	LSM12	0.0107784	0.950277	0.0924849	0.356652	ME5.21,ME6.22,ME7.23,ME8.11,ME9.10	LSM12_HUMAN	reviewed	Protein LSM12 homolog	LSM12	Homo sapiens (Human)	195
HPV-31_L1	P19338	NUCL	0.0091563	0.926672	0.103114	0.356647	ME5.23,ME6.20,ME7.22,ME8.10,ME9.12	NUCL_HUMAN	reviewed	Nucleolin (Protein C23)	NCL	Homo sapiens (Human)	710
HPV-31_L2	P11940	PABP1	0.00826794	0.993053	0.0732065	0.35662	ME5.22,ME6.21,ME7.20,ME8.7,ME9.7	PABP1_HUMAN	reviewed	Polyadenylate-binding protein 1 (PABP-1) (Poly(A)-binding protein 1)	PABPC1 PAB1 PABP1 PABPC2	Homo sapiens (Human)	636
HPV-31_E8^E2C	P84090	ERH	0.00497641	0.912172	0.109594	0.35659	ME5.15,ME6.15,ME7.15,ME8.4,ME9.2	ERH_HUMAN	reviewed	Enhancer of rudimentary homolog	ERH	Homo sapiens (Human)	104
HPV-31_E2	P11498	PYC	0.0147865	0.873702	0.126692	0.3565	ME5.20,ME6.19,ME7.21,ME8.9,ME9.9	PYC_HUMAN	reviewed	Pyruvate carboxylase, mitochondrial (EC 6.4.1.1) (Pyruvic carboxylase) (PCB)	PC	Homo sapiens (Human)	1178
HPV-31_E5	P62318	SMD3	0.00357578	0.739693	0.187038	0.356455	ME5.14,ME7.17,ME8.6,ME9.6	SMD3_HUMAN	reviewed	Small nuclear ribonucleoprotein Sm D3 (Sm-D3) (snRNP core protein D3)	SNRPD3	Homo sapiens (Human)	126
HPV-31_E8^E2C	P52272	HNRPM	0.00467918	0.840065	0.14177	0.356398	ME5.15,ME6.15,ME7.15,ME8.4,ME9.2	HNRPM_HUMAN	reviewed	Heterogeneous nuclear ribonucleoprotein M (hnRNP M)	HNRNPM HNRPM NAGR1	Homo sapiens (Human)	730
HPV-31_E1	O60814	H2B1K	0.016963	0.876891	0.125037	0.356362	ME5.21,ME6.22,ME7.23,ME8.11,ME9.10	H2B1K_HUMAN	reviewed	Histone H2B type 1-K (H2B K) (HIRA-interacting protein 1)	HIST1H2BK H2BFT HIRIP1	Homo sapiens (Human)	126
HPV-31_E1^E4	P36578	RL4	0.00631696	0.951275	0.0916479	0.35636	ME5.17,ME6.16,ME7.16,ME8.5,ME9.3	RL4_HUMAN	reviewed	60S ribosomal protein L4 (60S ribosomal protein L1)	RPL4 RPL1	Homo sapiens (Human)	427
HPV-31_E6	Q9BRK5	CAB45	0.000170577	6.21335e-11	0.519613	0.356201	ME5.18	CAB45_HUMAN	reviewed	45 kDa calcium-binding protein (Cab45) (Stromal cell-derived factor 4) (SDF-4)	SDF4 CAB45 PSEC0034	Homo sapiens (Human)	362
HPV-31_L1	P62701	RS4X	0.00873618	0.845024	0.139198	0.356189	ME6.20,ME7.22,ME8.10,ME9.12	RS4X_HUMAN	reviewed	40S ribosomal protein S4, X isoform (SCR10) (Single copy abundant mRNA protein)	RPS4X CCG2 RPS4 SCAR	Homo sapiens (Human)	263
HPV-31_E2	P18124	RL7	0.00374845	0.954226	0.0899713	0.356106	ME5.20,ME6.19,ME7.21,ME8.9,ME9.9	RL7_HUMAN	reviewed	60S ribosomal protein L7	RPL7	Homo sapiens (Human)	248
HPV-31_E5	P43358	MAGA4	0.000934025	0.430666	0.325537	0.356038	ME7.17,ME9.6	MAGA4_HUMAN	reviewed	Melanoma-associated antigen 4 (Cancer/testis antigen 1.4) (CT1.4) (MAGE-4 antigen) (MAGE-41 antigen) (MAGE-X2 antigen)	MAGEA4 MAGE4	Homo sapiens (Human)	317
HPV-31_E2	C9JLW8	F195B	0.0336586	0.881818	0.121974	0.355883	ME5.20,ME6.19,ME7.21,ME8.9,ME9.9	F195B_HUMAN	reviewed	Protein FAM195B	FAM195B	Homo sapiens (Human)	97
HPV-31_E6	Q3MHD2	LSM12	0.0109503	0.957155	0.0880739	0.355752	ME5.18,ME6.17,ME7.18,ME8.2,ME9.5	LSM12_HUMAN	reviewed	Protein LSM12 homolog	LSM12	Homo sapiens (Human)	195
HPV-31_L2	P84098	RL19	0.00225006	0.99166	0.07257	0.355718	ME5.22,ME6.21,ME7.20,ME8.7,ME9.7	RL19_HUMAN	reviewed	60S ribosomal protein L19	RPL19	Homo sapiens (Human)	196
HPV-31_L1	P62244	RS15A	0.00655754	0.835337	0.142704	0.35559	ME6.20,ME7.22,ME8.10,ME9.12	RS15A_HUMAN	reviewed	40S ribosomal protein S15a	RPS15A OK/SW-cl.82	Homo sapiens (Human)	130
HPV-31_L2	Q13885	TBB2A	0.0119771	0.853043	0.134668	0.355577	ME6.21,ME7.20,ME8.7,ME9.7	TBB2A_HUMAN	reviewed	Tubulin beta-2A chain	TUBB2A TUBB2	Homo sapiens (Human)	445
HPV-31_L2	P67809	YBOX1	0.00855015	0.97115	0.0811948	0.35534	ME5.22,ME6.21,ME7.20,ME8.7,ME9.7	YBOX1_HUMAN	reviewed	Nuclease-sensitive element-binding protein 1 (CCAAT-binding transcription factor I subunit A) (CBF-A) (DNA-binding protein B) (DBPB) (Enhancer factor I subunit A) (EFI-A) (Y-box transcription factor) (Y-box-binding protein 1) (YB-1)	YBX1 NSEP1 YB1	Homo sapiens (Human)	324
HPV-31_L2	P17066	HSP76	0.00636905	0.934803	0.097337	0.355178	ME5.22,ME6.21,ME7.20,ME8.7,ME9.7	HSP76_HUMAN	reviewed	Heat shock 70 kDa protein 6 (Heat shock 70 kDa protein B')	HSPA6 HSP70B'	Homo sapiens (Human)	643
HPV-31_E6	P09651	ROA1	0.00525075	0.957498	0.0871102	0.355163	ME5.18,ME6.17,ME7.18,ME8.2,ME9.5	ROA1_HUMAN	reviewed	Heterogeneous nuclear ribonucleoprotein A1 (hnRNP A1) (Helix-destabilizing protein) (Single-strand RNA-binding protein) (hnRNP core protein A1)	HNRNPA1 HNRPA1	Homo sapiens (Human)	372
HPV-31_E1^E4	P11142	HSP7C	0.0204759	0.956063	0.087407	0.355015	ME5.17,ME6.16,ME7.16,ME8.5,ME9.3	HSP7C_HUMAN	reviewed	Heat shock cognate 71 kDa protein (Heat shock 70 kDa protein 8)	HSPA8 HSC70 HSP73 HSPA10	Homo sapiens (Human)	646
HPV-31_L1	P52597	HNRPF	0.00269784	0.855001	0.133034	0.355006	ME6.20,ME7.22,ME8.10,ME9.12	HNRPF_HUMAN	reviewed	Heterogeneous nuclear ribonucleoprotein F (hnRNP F) (Nucleolin-like protein mcs94-1) [Cleaved into: Heterogeneous nuclear ribonucleoprotein F, N-terminally processed]	HNRNPF HNRPF	Homo sapiens (Human)	415
HPV-31_E1^E4	P09651	ROA1	0.00581407	0.915729	0.105521	0.3549	ME5.17,ME6.16,ME7.16,ME8.5,ME9.3	ROA1_HUMAN	reviewed	Heterogeneous nuclear ribonucleoprotein A1 (hnRNP A1) (Helix-destabilizing protein) (Single-strand RNA-binding protein) (hnRNP core protein A1)	HNRNPA1 HNRPA1	Homo sapiens (Human)	372
HPV-31_E6	P26196	DDX6	0.00896806	0.9891	0.0724156	0.354862	ME5.18,ME6.17,ME7.18,ME8.2,ME9.5	DDX6_HUMAN	reviewed	Probable ATP-dependent RNA helicase DDX6 (EC 3.6.4.13) (ATP-dependent RNA helicase p54) (DEAD box protein 6) (Oncogene RCK)	DDX6 HLR2 RCK	Homo sapiens (Human)	483
HPV-31_L2	Q9BVA1	TBB2B	0.0118924	0.852058	0.13397	0.354794	ME6.21,ME7.20,ME8.7,ME9.7	TBB2B_HUMAN	reviewed	Tubulin beta-2B chain	TUBB2B	Homo sapiens (Human)	445
HPV-31_L2	P34931	HS71L	0.0087351	0.936203	0.096088	0.354768	ME5.22,ME6.21,ME7.20,ME8.7,ME9.7	HS71L_HUMAN	reviewed	Heat shock 70 kDa protein 1-like (Heat shock 70 kDa protein 1L) (Heat shock 70 kDa protein 1-Hom) (HSP70-Hom)	HSPA1L	Homo sapiens (Human)	641
HPV-31_E2	P22626	ROA2	0.00722394	0.950471	0.0896423	0.354743	ME5.20,ME6.19,ME7.21,ME8.9,ME9.9	ROA2_HUMAN	reviewed	Heterogeneous nuclear ribonucleoproteins A2/B1 (hnRNP A2/B1)	HNRNPA2B1 HNRPA2B1	Homo sapiens (Human)	353
HPV-31_E1	P63167	DYL1	0.00324018	0.662588	0.219208	0.354717	ME6.22,ME7.23,ME8.11	DYL1_HUMAN	reviewed	Dynein light chain 1, cytoplasmic (8 kDa dynein light chain) (DLC8) (Dynein light chain LC8-type 1) (Protein inhibitor of neuronal nitric oxide synthase) (PIN)	DYNLL1 DLC1 DNCL1 DNCLC1 HDLC1	Homo sapiens (Human)	89
HPV-31_E1	P62241	RS8	0.011791	0.925894	0.10061	0.354706	ME5.21,ME6.22,ME7.23,ME8.11,ME9.10	RS8_HUMAN	reviewed	40S ribosomal protein S8	RPS8 OK/SW-cl.83	Homo sapiens (Human)	208
HPV-31_E1^E4	P34931	HS71L	0.00776449	0.937954	0.0950419	0.354585	ME5.17,ME6.16,ME7.16,ME8.5,ME9.3	HS71L_HUMAN	reviewed	Heat shock 70 kDa protein 1-like (Heat shock 70 kDa protein 1L) (Heat shock 70 kDa protein 1-Hom) (HSP70-Hom)	HSPA1L	Homo sapiens (Human)	641
HPV-31_E1	P11142	HSP7C	0.0245592	0.918083	0.103042	0.354038	ME5.21,ME6.22,ME7.23,ME8.11,ME9.10	HSP7C_HUMAN	reviewed	Heat shock cognate 71 kDa protein (Heat shock 70 kDa protein 8)	HSPA8 HSC70 HSP73 HSPA10	Homo sapiens (Human)	646
HPV-31_E1^E4	Q15029	U5S1	3.70996e-05	6.21335e-11	0.516378	0.353983	ME7.16	U5S1_HUMAN	reviewed	116 kDa U5 small nuclear ribonucleoprotein component (Elongation factor Tu GTP-binding domain-containing protein 2) (SNU114 homolog) (hSNU114) (U5 snRNP-specific protein, 116 kDa) (U5-116 kDa)	EFTUD2 KIAA0031 SNRP116	Homo sapiens (Human)	972
HPV-31_E5	P63167	DYL1	0.00351622	0.659367	0.219512	0.353933	ME6.18,ME7.17,ME8.6	DYL1_HUMAN	reviewed	Dynein light chain 1, cytoplasmic (8 kDa dynein light chain) (DLC8) (Dynein light chain LC8-type 1) (Protein inhibitor of neuronal nitric oxide synthase) (PIN)	DYNLL1 DLC1 DNCL1 DNCLC1 HDLC1	Homo sapiens (Human)	89
HPV-31_E7	P62829	RL23	0.0171484	0.811227	0.150954	0.35387	ME6.23,ME7.19,ME8.8,ME9.8	RL23_HUMAN	reviewed	60S ribosomal protein L23 (60S ribosomal protein L17)	RPL23	Homo sapiens (Human)	140
HPV-31_L2	P78527	PRKDC	0.000376527	0.674303	0.21266	0.353826	ME6.21,ME7.20,ME8.7,ME9.7	PRKDC_HUMAN	reviewed	DNA-dependent protein kinase catalytic subunit (DNA-PK catalytic subunit) (DNA-PKcs) (EC 2.7.11.1) (DNPK1) (p460)	PRKDC HYRC HYRC1	Homo sapiens (Human)	4128
HPV-31_E1^E4	P62899	RL31	0.0066778	0.950066	0.088381	0.35375	ME5.17,ME6.16,ME7.16,ME8.5,ME9.3	RL31_HUMAN	reviewed	60S ribosomal protein L31	RPL31	Homo sapiens (Human)	125
HPV-31_E1^E4	P84090	ERH	0.00382117	0.964337	0.0819487	0.353726	ME5.17,ME6.16,ME7.16,ME8.5,ME9.3	ERH_HUMAN	reviewed	Enhancer of rudimentary homolog	ERH	Homo sapiens (Human)	104
HPV-31_L1	P46776	RL27A	0.0048878	0.841981	0.1368	0.353583	ME6.20,ME7.22,ME8.10,ME9.12	RL27A_HUMAN	reviewed	60S ribosomal protein L27a	RPL27A	Homo sapiens (Human)	148
HPV-31_E1	P62753	RS6	0.00614445	0.918587	0.10225	0.353542	ME5.21,ME6.22,ME7.23,ME8.11,ME9.10	RS6_HUMAN	reviewed	40S ribosomal protein S6 (Phosphoprotein NP33)	RPS6 OK/SW-cl.2	Homo sapiens (Human)	249
HPV-31_E8^E2C	P42766	RL35	0.00378235	0.855238	0.130698	0.353484	ME5.15,ME7.15,ME8.4,ME9.2	RL35_HUMAN	reviewed	60S ribosomal protein L35	RPL35	Homo sapiens (Human)	123
HPV-31_L1	P10412	H14	0.0115682	0.925475	0.0989418	0.353431	ME5.23,ME6.20,ME7.22,ME8.10,ME9.12	H14_HUMAN	reviewed	Histone H1.4 (Histone H1b) (Histone H1s-4)	HIST1H1E H1F4	Homo sapiens (Human)	219
HPV-31_E5	P19338	NUCL	0.00968123	0.903077	0.109026	0.353422	ME5.14,ME6.18,ME7.17,ME8.6,ME9.6	NUCL_HUMAN	reviewed	Nucleolin (Protein C23)	NCL	Homo sapiens (Human)	710
HPV-31_L1	Q13151	ROA0	0.00256365	0.852756	0.131414	0.353202	ME6.20,ME7.22,ME8.10,ME9.12	ROA0_HUMAN	reviewed	Heterogeneous nuclear ribonucleoprotein A0 (hnRNP A0)	HNRNPA0 HNRPA0	Homo sapiens (Human)	305
HPV-31_E5	O43933	PEX1	0.000395898	0.424409	0.323996	0.353048	ME6.18,ME8.6	PEX1_HUMAN	reviewed	Peroxisome biogenesis factor 1 (Peroxin-1) (Peroxisome biogenesis disorder protein 1)	PEX1	Homo sapiens (Human)	1283
HPV-31_E6	Q7Z417	NUFP2	0.00660952	0.956325	0.0845316	0.353042	ME5.18,ME6.17,ME7.18,ME8.2,ME9.5	NUFP2_HUMAN	reviewed	Nuclear fragile X mental retardation-interacting protein 2 (82 kDa FMRP-interacting protein) (82-FIP) (Cell proliferation-inducing gene 1 protein) (FMRP-interacting protein 2)	NUFIP2 KIAA1321 PIG1	Homo sapiens (Human)	695
HPV-31_E5	P08865	RSSA	0.00275413	0.832556	0.140144	0.352955	ME5.14,ME6.18,ME7.17,ME9.6	RSSA_HUMAN	reviewed	40S ribosomal protein SA (37 kDa laminin receptor precursor) (37LRP) (37/67 kDa laminin receptor) (LRP/LR) (67 kDa laminin receptor) (67LR) (Colon carcinoma laminin-binding protein) (Laminin receptor 1) (LamR) (Laminin-binding protein precursor p40) (LBP/p40) (Multidrug resistance-associated protein MGr1-Ag) (NEM/1CHD4)	RPSA LAMBR LAMR1	Homo sapiens (Human)	295
HPV-31_E1	P62917	RL8	0.00415828	0.905455	0.107114	0.352813	ME5.21,ME6.22,ME7.23,ME8.11,ME9.10	RL8_HUMAN	reviewed	60S ribosomal protein L8	RPL8	Homo sapiens (Human)	257
HPV-31_E1^E4	P84103	SRSF3	0.00263853	0.803976	0.152752	0.352779	ME6.16,ME7.16,ME8.5,ME9.3	SRSF3_HUMAN	reviewed	Serine/arginine-rich splicing factor 3 (Pre-mRNA-splicing factor SRP20) (Splicing factor, arginine/serine-rich 3)	SRSF3 SFRS3 SRP20	Homo sapiens (Human)	164
HPV-31_E7	Q13509	TBB3	0.00811254	0.855807	0.129334	0.35275	ME6.23,ME7.19,ME8.8,ME9.8	TBB3_HUMAN	reviewed	Tubulin beta-3 chain (Tubulin beta-4 chain) (Tubulin beta-III)	TUBB3 TUBB4	Homo sapiens (Human)	450
HPV-31_L2	P25398	RS12	0.00555171	0.902851	0.108051	0.35266	ME5.22,ME6.21,ME7.20,ME8.7,ME9.7	RS12_HUMAN	reviewed	40S ribosomal protein S12	RPS12	Homo sapiens (Human)	132
HPV-31_E2	P62266	RS23	0.00558856	0.789677	0.158895	0.352596	ME5.20,ME6.19,ME7.21,ME9.9	RS23_HUMAN	reviewed	40S ribosomal protein S23	RPS23	Homo sapiens (Human)	143
HPV-31_E1^E4	P19338	NUCL	0.00649093	0.960974	0.0815764	0.352449	ME5.17,ME6.16,ME7.16,ME8.5,ME9.3	NUCL_HUMAN	reviewed	Nucleolin (Protein C23)	NCL	Homo sapiens (Human)	710
HPV-31_E8^E2C	P62888	RL30	0.00728118	0.852325	0.130392	0.352396	ME5.15,ME7.15,ME8.4,ME9.2	RL30_HUMAN	reviewed	60S ribosomal protein L30	RPL30	Homo sapiens (Human)	115
HPV-31_L2	P62861	RS30	0.00445194	0.828925	0.140837	0.35232	ME5.22,ME6.21,ME7.20,ME9.7	RS30_HUMAN	reviewed	40S ribosomal protein S30	FAU	Homo sapiens (Human)	59
HPV-31_E6	P47914	RL29	0.00273828	0.980467	0.0725579	0.352259	ME5.18,ME6.17,ME7.18,ME8.2,ME9.5	RL29_HUMAN	reviewed	60S ribosomal protein L29 (Cell surface heparin-binding protein HIP)	RPL29	Homo sapiens (Human)	159
HPV-31_E1	P39023	RL3	0.00416154	0.935943	0.0925403	0.352229	ME5.21,ME6.22,ME7.23,ME8.11,ME9.10	RL3_HUMAN	reviewed	60S ribosomal protein L3 (HIV-1 TAR RNA-binding protein B) (TARBP-B)	RPL3 OK/SW-cl.32	Homo sapiens (Human)	403
HPV-31_L1	P62847	RS24	0.00713769	0.852693	0.129929	0.352191	ME6.20,ME7.22,ME8.10,ME9.12	RS24_HUMAN	reviewed	40S ribosomal protein S24	RPS24	Homo sapiens (Human)	133
HPV-31_E1^E4	P62241	RS8	0.00809944	0.982791	0.0713588	0.352186	ME5.17,ME6.16,ME7.16,ME8.5,ME9.3	RS8_HUMAN	reviewed	40S ribosomal protein S8	RPS8 OK/SW-cl.83	Homo sapiens (Human)	208
HPV-31_E8^E2C	P68104	EF1A1	0.00396043	0.969547	0.0771146	0.352021	ME5.15,ME6.15,ME7.15,ME8.4,ME9.2	EF1A1_HUMAN	reviewed	Elongation factor 1-alpha 1 (EF-1-alpha-1) (Elongation factor Tu) (EF-Tu) (Eukaryotic elongation factor 1 A-1) (eEF1A-1) (Leukocyte receptor cluster member 7)	EEF1A1 EEF1A EF1A LENG7	Homo sapiens (Human)	462
HPV-31_L1	Q9BUJ2	HNRL1	0.000340315	0.398205	0.33413	0.35191	ME7.22,ME9.12	HNRL1_HUMAN	reviewed	Heterogeneous nuclear ribonucleoprotein U-like protein 1 (Adenovirus early region 1B-associated protein 5) (E1B-55 kDa-associated protein 5) (E1B-AP5)	HNRNPUL1 E1BAP5 HNRPUL1	Homo sapiens (Human)	856
HPV-31_E6	P67809	YBOX1	0.00797704	0.971341	0.0757524	0.351664	ME5.18,ME6.17,ME7.18,ME8.2,ME9.5	YBOX1_HUMAN	reviewed	Nuclease-sensitive element-binding protein 1 (CCAAT-binding transcription factor I subunit A) (CBF-A) (DNA-binding protein B) (DBPB) (Enhancer factor I subunit A) (EFI-A) (Y-box transcription factor) (Y-box-binding protein 1) (YB-1)	YBX1 NSEP1 YB1	Homo sapiens (Human)	324
HPV-31_L1	P40429	RL13A	0.00381331	0.835829	0.136766	0.351656	ME6.20,ME7.22,ME8.10,ME9.12	RL13A_HUMAN	reviewed	60S ribosomal protein L13a (23 kDa highly basic protein)	RPL13A	Homo sapiens (Human)	203
HPV-31_L2	Q8WWM7	ATX2L	0.00976239	0.955281	0.0829203	0.351634	ME5.22,ME6.21,ME7.20,ME8.7,ME9.7	ATX2L_HUMAN	reviewed	Ataxin-2-like protein (Ataxin-2 domain protein) (Ataxin-2-related protein)	ATXN2L A2D A2LG A2LP A2RP	Homo sapiens (Human)	1075
HPV-31_E7	P46779	RL28	0.0069939	0.918673	0.0990791	0.3514	ME5.19,ME6.23,ME7.19,ME8.8,ME9.8	RL28_HUMAN	reviewed	60S ribosomal protein L28	RPL28	Homo sapiens (Human)	137
HPV-31_E7	P68104	EF1A1	0.00753672	0.845757	0.131819	0.351349	ME6.23,ME7.19,ME8.8,ME9.8	EF1A1_HUMAN	reviewed	Elongation factor 1-alpha 1 (EF-1-alpha-1) (Elongation factor Tu) (EF-Tu) (Eukaryotic elongation factor 1 A-1) (eEF1A-1) (Leukocyte receptor cluster member 7)	EEF1A1 EEF1A EF1A LENG7	Homo sapiens (Human)	462
HPV-31_E1	P09651	ROA1	0.00517847	0.92704	0.0950823	0.35123	ME5.21,ME6.22,ME7.23,ME8.11,ME9.10	ROA1_HUMAN	reviewed	Heterogeneous nuclear ribonucleoprotein A1 (hnRNP A1) (Helix-destabilizing protein) (Single-strand RNA-binding protein) (hnRNP core protein A1)	HNRNPA1 HNRPA1	Homo sapiens (Human)	372
HPV-31_E1	P67809	YBOX1	0.0100167	0.909317	0.102995	0.351215	ME5.21,ME6.22,ME7.23,ME8.11,ME9.10	YBOX1_HUMAN	reviewed	Nuclease-sensitive element-binding protein 1 (CCAAT-binding transcription factor I subunit A) (CBF-A) (DNA-binding protein B) (DBPB) (Enhancer factor I subunit A) (EFI-A) (Y-box transcription factor) (Y-box-binding protein 1) (YB-1)	YBX1 NSEP1 YB1	Homo sapiens (Human)	324
HPV-31_L1	P13010	XRCC5	0.000768694	0.425517	0.320819	0.351214	ME7.22,ME9.12	XRCC5_HUMAN	reviewed	X-ray repair cross-complementing protein 5 (EC 3.6.4.-) (86 kDa subunit of Ku antigen) (ATP-dependent DNA helicase 2 subunit 2) (ATP-dependent DNA helicase II 80 kDa subunit) (CTC box-binding factor 85 kDa subunit) (CTC85) (CTCBF) (DNA repair protein XRCC5) (Ku80) (Ku86) (Lupus Ku autoantigen protein p86) (Nuclear factor IV) (Thyroid-lupus autoantigen) (TLAA) (X-ray repair complementing defective…	XRCC5 G22P2	Homo sapiens (Human)	732
HPV-31_E7	P84090	ERH	0.00525691	0.91128	0.102093	0.351174	ME5.19,ME6.23,ME7.19,ME8.8,ME9.8	ERH_HUMAN	reviewed	Enhancer of rudimentary homolog	ERH	Homo sapiens (Human)	104
HPV-31_L1	Q5SZQ8	CELF3	0.000109585	6.21335e-11	0.512159	0.351091	ME9.12	CELF3_HUMAN	reviewed	CUGBP Elav-like family member 3 (CELF-3) (Bruno-like protein 1) (CAG repeat protein 4) (CUG-BP- and ETR-3-like factor 3) (ELAV-type RNA-binding protein 1) (ETR-1) (Expanded repeat domain protein CAG/CTG 4) (RNA-binding protein BRUNOL-1) (Trinucleotide repeat-containing gene 4 protein)	CELF3 BRUNOL1 CAGH4 ERDA4 TNRC4	Homo sapiens (Human)	465
HPV-31_E1^E4	P67809	YBOX1	0.00805023	0.950066	0.0844836	0.351086	ME5.17,ME6.16,ME7.16,ME8.5,ME9.3	YBOX1_HUMAN	reviewed	Nuclease-sensitive element-binding protein 1 (CCAAT-binding transcription factor I subunit A) (CBF-A) (DNA-binding protein B) (DBPB) (Enhancer factor I subunit A) (EFI-A) (Y-box transcription factor) (Y-box-binding protein 1) (YB-1)	YBX1 NSEP1 YB1	Homo sapiens (Human)	324
HPV-31_E8^E2C	P08107	HSP71	0.017538	0.904228	0.105026	0.351083	ME5.15,ME6.15,ME7.15,ME8.4,ME9.2	HSP71_HUMAN	reviewed	Heat shock 70 kDa protein 1A/1B (Heat shock 70 kDa protein 1/2) (HSP70-1/HSP70-2) (HSP70.1/HSP70.2)	HSPA1A HSPA1; HSPA1B	Homo sapiens (Human)	641
HPV-31_E2	P62888	RL30	0.00885575	0.794787	0.15424	0.351002	ME5.20,ME7.21,ME8.9,ME9.9	RL30_HUMAN	reviewed	60S ribosomal protein L30	RPL30	Homo sapiens (Human)	115
HPV-31_E8^E2C	P34931	HS71L	0.00916829	0.893436	0.109776	0.350959	ME5.15,ME6.15,ME7.15,ME8.4,ME9.2	HS71L_HUMAN	reviewed	Heat shock 70 kDa protein 1-like (Heat shock 70 kDa protein 1L) (Heat shock 70 kDa protein 1-Hom) (HSP70-Hom)	HSPA1L	Homo sapiens (Human)	641
HPV-31_L2	Q9P2E9	RRBP1	5.72593e-05	6.21335e-11	0.511689	0.350769	ME7.20	RRBP1_HUMAN	reviewed	Ribosome-binding protein 1 (180 kDa ribosome receptor homolog) (RRp) (ES/130-related protein) (Ribosome receptor protein)	RRBP1 KIAA1398	Homo sapiens (Human)	1410
HPV-31_E2	Q7L7X3	TAOK1	0.000549946	0.591595	0.245389	0.350744	ME5.20,ME7.21,ME8.9	TAOK1_HUMAN	reviewed	Serine/threonine-protein kinase TAO1 (EC 2.7.11.1) (Kinase from chicken homolog B) (hKFC-B) (MARK Kinase) (MARKK) (Prostate-derived sterile 20-like kinase 2) (PSK-2) (PSK2) (Prostate-derived STE20-like kinase 2) (Thousand and one amino acid protein kinase 1) (TAOK1) (hTAOK1)	TAOK1 KIAA1361 MAP3K16 MARKK	Homo sapiens (Human)	1001
HPV-31_E1^E4	O00161	SNP23	0.00452988	0.947356	0.0852087	0.350726	ME5.17,ME6.16,ME7.16,ME8.5,ME9.3	SNP23_HUMAN	reviewed	Synaptosomal-associated protein 23 (SNAP-23) (Vesicle-membrane fusion protein SNAP-23)	SNAP23	Homo sapiens (Human)	211
HPV-31_E5	P62158	CALM	0.00827255	0.738575	0.179118	0.350709	ME5.14,ME6.18,ME7.17,ME8.6	CALM_HUMAN	reviewed	Calmodulin (CaM)	CALM1 CALM CAM CAM1; CALM2 CAM2 CAMB; CALM3 CALML2 CAM3 CAMC CAMIII	Homo sapiens (Human)	149
HPV-31_E5	Q01130	SRSF2	0.000477281	6.21335e-11	0.511503	0.350643	ME8.6	SRSF2_HUMAN	reviewed	Serine/arginine-rich splicing factor 2 (Protein PR264) (Splicing component, 35 kDa) (Splicing factor SC35) (SC-35) (Splicing factor, arginine/serine-rich 2)	SRSF2 SFRS2	Homo sapiens (Human)	221
HPV-31_E8^E2C	P48741	HSP77	0.00594917	0.897628	0.107386	0.350595	ME5.15,ME6.15,ME7.15,ME8.4,ME9.2	HSP77_HUMAN	reviewed	Putative heat shock 70 kDa protein 7 (Heat shock 70 kDa protein B)	HSPA7 HSP70B	Homo sapiens (Human)	367
HPV-31_L2	P26196	DDX6	0.00801271	0.991512	0.0647014	0.350312	ME5.22,ME6.21,ME7.20,ME8.7,ME9.7	DDX6_HUMAN	reviewed	Probable ATP-dependent RNA helicase DDX6 (EC 3.6.4.13) (ATP-dependent RNA helicase p54) (DEAD box protein 6) (Oncogene RCK)	DDX6 HLR2 RCK	Homo sapiens (Human)	483
HPV-31_E2	P0CG47	UBB	0.00521014	0.840949	0.13249	0.350312	ME5.20,ME6.19,ME8.9,ME9.9	UBB_HUMAN	reviewed	Polyubiquitin-B [Cleaved into: Ubiquitin]	UBB	Homo sapiens (Human)	229
HPV-31_E1	P42766	RL35	0.0037426	0.856103	0.125682	0.350312	ME5.21,ME6.22,ME7.23,ME9.10	RL35_HUMAN	reviewed	60S ribosomal protein L35	RPL35	Homo sapiens (Human)	123
HPV-31_L1	P62888	RL30	0.00850788	0.843068	0.131505	0.35031	ME6.20,ME7.22,ME8.10,ME9.12	RL30_HUMAN	reviewed	60S ribosomal protein L30	RPL30	Homo sapiens (Human)	115
HPV-31_E8^E2C	P46779	RL28	0.00762426	0.859376	0.124155	0.350298	ME5.15,ME7.15,ME8.4,ME9.2	RL28_HUMAN	reviewed	60S ribosomal protein L28	RPL28	Homo sapiens (Human)	137
HPV-31_E1^E4	Q96EP5	DAZP1	0.00411763	0.916518	0.0984117	0.35026	ME5.17,ME6.16,ME7.16,ME8.5,ME9.3	DAZP1_HUMAN	reviewed	DAZ-associated protein 1 (Deleted in azoospermia-associated protein 1)	DAZAP1	Homo sapiens (Human)	407
HPV-31_E7	P49458	SRP09	0.00371232	0.831092	0.136853	0.350253	ME6.23,ME7.19,ME8.8,ME9.8	SRP09_HUMAN	reviewed	Signal recognition particle 9 kDa protein (SRP9)	SRP9	Homo sapiens (Human)	86
HPV-31_E5	P05387	RLA2	0.00941408	0.799635	0.150957	0.35025	ME6.18,ME7.17,ME8.6,ME9.6	RLA2_HUMAN	reviewed	60S acidic ribosomal protein P2 (Renal carcinoma antigen NY-REN-44)	RPLP2 D11S2243E RPP2	Homo sapiens (Human)	115
HPV-31_E6	P38646	GRP75	0.0066212	0.976094	0.0715297	0.350228	ME5.18,ME6.17,ME7.18,ME8.2,ME9.5	GRP75_HUMAN	reviewed	Stress-70 protein, mitochondrial (75 kDa glucose-regulated protein) (GRP-75) (Heat shock 70 kDa protein 9) (Mortalin) (MOT) (Peptide-binding protein 74) (PBP74)	HSPA9 GRP75 HSPA9B	Homo sapiens (Human)	679
HPV-31_E1	P68363	TBA1B	0.0109865	0.943792	0.0859922	0.350202	ME5.21,ME6.22,ME7.23,ME8.11,ME9.10	TBA1B_HUMAN	reviewed	Tubulin alpha-1B chain (Alpha-tubulin ubiquitous) (Tubulin K-alpha-1) (Tubulin alpha-ubiquitous chain)	TUBA1B	Homo sapiens (Human)	451
HPV-31_L2	P48741	HSP77	0.00522134	0.94414	0.0857556	0.350113	ME5.22,ME6.21,ME7.20,ME8.7,ME9.7	HSP77_HUMAN	reviewed	Putative heat shock 70 kDa protein 7 (Heat shock 70 kDa protein B)	HSPA7 HSP70B	Homo sapiens (Human)	367
HPV-31_L1	Q15717	ELAV1	0.00472174	0.853996	0.126275	0.350074	ME6.20,ME7.22,ME8.10,ME9.12	ELAV1_HUMAN	reviewed	ELAV-like protein 1 (Hu-antigen R) (HuR)	ELAVL1 HUR	Homo sapiens (Human)	326
HPV-31_L1	Q9NZI8	IF2B1	0.00201849	0.846544	0.129389	0.349894	ME6.20,ME7.22,ME8.10,ME9.12	IF2B1_HUMAN	reviewed	Insulin-like growth factor 2 mRNA-binding protein 1 (IGF2 mRNA-binding protein 1) (IMP-1) (Coding region determinant-binding protein) (CRD-BP) (IGF-II mRNA-binding protein 1) (VICKZ family member 1) (Zip code-binding protein 1) (ZBP-1) (Zipcode-binding protein 1)	IGF2BP1 CRDBP VICKZ1 ZBP1	Homo sapiens (Human)	577
HPV-31_L2	Q9BQE3	TBA1C	0.0114902	0.839664	0.13238	0.349878	ME6.21,ME7.20,ME8.7,ME9.7	TBA1C_HUMAN	reviewed	Tubulin alpha-1C chain (Alpha-tubulin 6) (Tubulin alpha-6 chain)	TUBA1C TUBA6	Homo sapiens (Human)	449
HPV-31_E5	O15234	CASC3	5.30932e-05	6.21335e-11	0.510085	0.349669	ME7.17	CASC3_HUMAN	reviewed	Protein CASC3 (Cancer susceptibility candidate gene 3 protein) (Metastatic lymph node gene 51 protein) (MLN 51) (Protein barentsz) (Btz)	CASC3 MLN51	Homo sapiens (Human)	703
HPV-31_L2	P63244	GBLP	0.00131075	0.341262	0.356434	0.349637	ME7.20,ME9.7	GBLP_HUMAN	reviewed	Guanine nucleotide-binding protein subunit beta-2-like 1 (Cell proliferation-inducing gene 21 protein) (Guanine nucleotide-binding protein subunit beta-like protein 12.3) (Human lung cancer oncogene 7 protein) (HLC-7) (Receptor for activated C kinase) (Receptor of activated protein kinase C 1) (RACK1)	GNB2L1 HLC7 PIG21	Homo sapiens (Human)	317
HPV-31_E1^E4	P62857	RS28	0.0103315	0.965202	0.0752075	0.349411	ME5.17,ME6.16,ME7.16,ME8.5,ME9.3	RS28_HUMAN	reviewed	40S ribosomal protein S28	RPS28	Homo sapiens (Human)	69
HPV-31_E2	P42766	RL35	0.00393059	0.831936	0.135129	0.349333	ME5.20,ME6.19,ME7.21,ME9.9	RL35_HUMAN	reviewed	60S ribosomal protein L35	RPL35	Homo sapiens (Human)	123
HPV-31_E1^E4	P83731	RL24	0.00497911	0.961079	0.0769458	0.349299	ME5.17,ME6.16,ME7.16,ME8.5,ME9.3	RL24_HUMAN	reviewed	60S ribosomal protein L24 (60S ribosomal protein L30)	RPL24	Homo sapiens (Human)	157
HPV-31_L2	P11142	HSP7C	0.0221302	0.941228	0.0855046	0.349143	ME5.22,ME6.21,ME7.20,ME8.7,ME9.7	HSP7C_HUMAN	reviewed	Heat shock cognate 71 kDa protein (Heat shock 70 kDa protein 8)	HSPA8 HSC70 HSP73 HSPA10	Homo sapiens (Human)	646
HPV-31_L1	O60814	H2B1K	0.0161231	0.894683	0.106415	0.349081	ME5.23,ME6.20,ME7.22,ME8.10,ME9.12	H2B1K_HUMAN	reviewed	Histone H2B type 1-K (H2B K) (HIRA-interacting protein 1)	HIST1H2BK H2BFT HIRIP1	Homo sapiens (Human)	126
HPV-31_E8^E2C	P17066	HSP76	0.00583781	0.915504	0.0970116	0.348998	ME5.15,ME6.15,ME7.15,ME8.4,ME9.2	HSP76_HUMAN	reviewed	Heat shock 70 kDa protein 6 (Heat shock 70 kDa protein B')	HSPA6 HSP70B'	Homo sapiens (Human)	643
HPV-31_L2	P31943	HNRH1	0.0020722	0.966796	0.0738193	0.348902	ME5.22,ME6.21,ME7.20,ME8.7,ME9.7	HNRH1_HUMAN	reviewed	Heterogeneous nuclear ribonucleoprotein H (hnRNP H) [Cleaved into: Heterogeneous nuclear ribonucleoprotein H, N-terminally processed]	HNRNPH1 HNRPH HNRPH1	Homo sapiens (Human)	449
HPV-31_L2	P53007	TXTP	0.000382119	6.21335e-11	0.508947	0.348891	ME6.21	TXTP_HUMAN	reviewed	Tricarboxylate transport protein, mitochondrial (Citrate transport protein) (CTP) (Solute carrier family 25 member 1) (Tricarboxylate carrier protein)	SLC25A1 SLC20A3	Homo sapiens (Human)	311
HPV-31_E7	P09651	ROA1	0.0038002	0.990441	0.0630455	0.348822	ME5.19,ME6.23,ME7.19,ME8.8,ME9.8	ROA1_HUMAN	reviewed	Heterogeneous nuclear ribonucleoprotein A1 (hnRNP A1) (Helix-destabilizing protein) (Single-strand RNA-binding protein) (hnRNP core protein A1)	HNRNPA1 HNRPA1	Homo sapiens (Human)	372
HPV-31_E6	P11940	PABP1	0.0090276	0.951935	0.0799327	0.348549	ME5.18,ME6.17,ME7.18,ME8.2,ME9.5	PABP1_HUMAN	reviewed	Polyadenylate-binding protein 1 (PABP-1) (Poly(A)-binding protein 1)	PABPC1 PAB1 PABP1 PABPC2	Homo sapiens (Human)	636
HPV-31_E8^E2C	Q96EP5	DAZP1	0.00301886	0.96936	0.0719515	0.348418	ME5.15,ME6.15,ME7.15,ME8.4,ME9.2	DAZP1_HUMAN	reviewed	DAZ-associated protein 1 (Deleted in azoospermia-associated protein 1)	DAZAP1	Homo sapiens (Human)	407
HPV-31_L2	P68104	EF1A1	0.00392237	0.976208	0.068603	0.348241	ME5.22,ME6.21,ME7.20,ME8.7,ME9.7	EF1A1_HUMAN	reviewed	Elongation factor 1-alpha 1 (EF-1-alpha-1) (Elongation factor Tu) (EF-Tu) (Eukaryotic elongation factor 1 A-1) (eEF1A-1) (Leukocyte receptor cluster member 7)	EEF1A1 EEF1A EF1A LENG7	Homo sapiens (Human)	462
HPV-31_E6	P62241	RS8	0.00815061	0.983577	0.0650519	0.348105	ME5.18,ME6.17,ME7.18,ME8.2,ME9.5	RS8_HUMAN	reviewed	40S ribosomal protein S8	RPS8 OK/SW-cl.83	Homo sapiens (Human)	208
HPV-31_E1^E4	Q9NX20	RM16	0.000142934	6.21335e-11	0.507768	0.348081	ME7.16	RM16_HUMAN	reviewed	39S ribosomal protein L16, mitochondrial (L16mt) (MRP-L16)	MRPL16 PNAS-111	Homo sapiens (Human)	251
HPV-31_E1^E4	O14950	ML12B	0.000526586	0.415857	0.320456	0.347983	ME7.16,ME9.3	ML12B_HUMAN	reviewed	Myosin regulatory light chain 12B (MLC-2A) (MLC-2) (Myosin regulatory light chain 2-B, smooth muscle isoform) (Myosin regulatory light chain 20 kDa) (MLC20) (Myosin regulatory light chain MRLC2) (SHUJUN-1)	MYL12B MRLC2 MYLC2B	Homo sapiens (Human)	172
HPV-31_L1	P68104	EF1A1	0.00366949	0.985149	0.0641802	0.347966	ME5.23,ME6.20,ME7.22,ME8.10,ME9.12	EF1A1_HUMAN	reviewed	Elongation factor 1-alpha 1 (EF-1-alpha-1) (Elongation factor Tu) (EF-Tu) (Eukaryotic elongation factor 1 A-1) (eEF1A-1) (Leukocyte receptor cluster member 7)	EEF1A1 EEF1A EF1A LENG7	Homo sapiens (Human)	462
HPV-31_E1^E4	P62913	RL11	0.00389699	0.941005	0.0839874	0.347926	ME5.17,ME6.16,ME7.16,ME8.5,ME9.3	RL11_HUMAN	reviewed	60S ribosomal protein L11 (CLL-associated antigen KW-12)	RPL11	Homo sapiens (Human)	178
HPV-31_E1^E4	Q00325	MPCP	0.00168439	0.828337	0.134509	0.347784	ME5.17,ME6.16,ME7.16,ME8.5	MPCP_HUMAN	reviewed	Phosphate carrier protein, mitochondrial (Phosphate transport protein) (PTP) (Solute carrier family 25 member 3)	SLC25A3 PHC OK/SW-cl.48	Homo sapiens (Human)	362
HPV-31_E1^E4	P15880	RS2	0.00496004	0.94075	0.083883	0.347782	ME5.17,ME6.16,ME7.16,ME8.5,ME9.3	RS2_HUMAN	reviewed	40S ribosomal protein S2 (40S ribosomal protein S4) (Protein LLRep3)	RPS2 RPS4	Homo sapiens (Human)	293
HPV-31_E5	Q86VP6	CAND1	2.96962e-05	6.21335e-11	0.507202	0.347692	ME7.17	CAND1_HUMAN	reviewed	Cullin-associated NEDD8-dissociated protein 1 (Cullin-associated and neddylation-dissociated protein 1) (TBP-interacting protein of 120 kDa A) (TBP-interacting protein 120A) (p120 CAND1)	CAND1 KIAA0829 TIP120 TIP120A	Homo sapiens (Human)	1230
HPV-31_E5	Q9Y4A5	TRRAP	9.24926e-06	6.21335e-11	0.507202	0.347692	ME7.17	TRRAP_HUMAN	reviewed	Transformation/transcription domain-associated protein (350/400 kDa PCAF-associated factor) (PAF350/400) (STAF40) (Tra1 homolog)	TRRAP PAF400	Homo sapiens (Human)	3859
HPV-31_L1	P26368	U2AF2	0.000268142	6.21335e-11	0.507015	0.347565	ME7.22	U2AF2_HUMAN	reviewed	Splicing factor U2AF 65 kDa subunit (U2 auxiliary factor 65 kDa subunit) (hU2AF(65)) (hU2AF65) (U2 snRNP auxiliary factor large subunit)	U2AF2 U2AF65	Homo sapiens (Human)	475
HPV-31_L2	Q02978	M2OM	0.000437469	0.651718	0.213565	0.347478	ME6.21,ME7.20,ME9.7	M2OM_HUMAN	reviewed	Mitochondrial 2-oxoglutarate/malate carrier protein (OGCP) (Solute carrier family 25 member 11)	SLC25A11 SLC20A4	Homo sapiens (Human)	314
HPV-31_L2	P46777	RL5	0.00214425	0.928923	0.0886605	0.347391	ME5.22,ME6.21,ME7.20,ME8.7,ME9.7	RL5_HUMAN	reviewed	60S ribosomal protein L5	RPL5 MSTP030	Homo sapiens (Human)	297
HPV-31_E6	P84090	ERH	0.00431992	0.939388	0.0838962	0.347367	ME5.18,ME6.17,ME7.18,ME8.2,ME9.5	ERH_HUMAN	reviewed	Enhancer of rudimentary homolog	ERH	Homo sapiens (Human)	104
HPV-31_E1	P34931	HS71L	0.00921188	0.8795	0.110796	0.347359	ME5.21,ME6.22,ME7.23,ME8.11,ME9.10	HS71L_HUMAN	reviewed	Heat shock 70 kDa protein 1-like (Heat shock 70 kDa protein 1L) (Heat shock 70 kDa protein 1-Hom) (HSP70-Hom)	HSPA1L	Homo sapiens (Human)	641
HPV-31_E1^E4	P62829	RL23	0.00644599	0.973003	0.068691	0.347327	ME5.17,ME6.16,ME7.16,ME8.5,ME9.3	RL23_HUMAN	reviewed	60S ribosomal protein L23 (60S ribosomal protein L17)	RPL23	Homo sapiens (Human)	140
HPV-31_E2	P46779	RL28	0.00917984	0.799685	0.145793	0.346724	ME5.20,ME7.21,ME8.9,ME9.9	RL28_HUMAN	reviewed	60S ribosomal protein L28	RPL28	Homo sapiens (Human)	137
HPV-31_L2	P05387	RLA2	0.00780964	0.845302	0.12523	0.346694	ME5.22,ME6.21,ME7.20,ME9.7	RLA2_HUMAN	reviewed	60S acidic ribosomal protein P2 (Renal carcinoma antigen NY-REN-44)	RPLP2 D11S2243E RPP2	Homo sapiens (Human)	115
HPV-31_E8^E2C	O43390	HNRPR	0.00151309	0.843922	0.125713	0.346562	ME5.15,ME7.15,ME8.4,ME9.2	HNRPR_HUMAN	reviewed	Heterogeneous nuclear ribonucleoprotein R (hnRNP R)	HNRNPR HNRPR	Homo sapiens (Human)	633
HPV-31_E8^E2C	P26373	RL13	0.00565541	0.838818	0.127861	0.346484	ME5.15,ME7.15,ME8.4,ME9.2	RL13_HUMAN	reviewed	60S ribosomal protein L13 (Breast basic conserved protein 1)	RPL13 BBC1 OK/SW-cl.46	Homo sapiens (Human)	211
HPV-31_L2	P47914	RL29	0.00244579	0.977733	0.0648077	0.346101	ME5.22,ME6.21,ME7.20,ME8.7,ME9.7	RL29_HUMAN	reviewed	60S ribosomal protein L29 (Cell surface heparin-binding protein HIP)	RPL29	Homo sapiens (Human)	159
HPV-31_E8^E2C	Q08211	DHX9	0.0018456	0.814992	0.137695	0.345852	ME6.15,ME7.15,ME8.4,ME9.2	DHX9_HUMAN	reviewed	ATP-dependent RNA helicase A (RHA) (EC 3.6.4.13) (DEAH box protein 9) (Leukophysin) (LKP) (Nuclear DNA helicase II) (NDH II)	DHX9 DDX9 LKP NDH2	Homo sapiens (Human)	1270
HPV-31_L1	P23396	RS3	0.0082786	0.834786	0.127891	0.345276	ME6.20,ME7.22,ME8.10,ME9.12	RS3_HUMAN	reviewed	40S ribosomal protein S3	RPS3 OK/SW-cl.26	Homo sapiens (Human)	243
HPV-31_E1	P04350	TBB4A	0.0105523	0.847923	0.121956	0.345275	ME6.22,ME7.23,ME8.11,ME9.10	TBB4A_HUMAN	reviewed	Tubulin beta-4A chain (Tubulin 5 beta) (Tubulin beta-4 chain)	TUBB4A TUBB4 TUBB5	Homo sapiens (Human)	444
HPV-31_E1	O14950	ML12B	0.000530822	0.403149	0.322204	0.34526	ME7.23,ME9.10	ML12B_HUMAN	reviewed	Myosin regulatory light chain 12B (MLC-2A) (MLC-2) (Myosin regulatory light chain 2-B, smooth muscle isoform) (Myosin regulatory light chain 20 kDa) (MLC20) (Myosin regulatory light chain MRLC2) (SHUJUN-1)	MYL12B MRLC2 MYLC2B	Homo sapiens (Human)	172
HPV-31_E2	P48741	HSP77	0.00548641	0.896807	0.099867	0.345184	ME5.20,ME6.19,ME7.21,ME8.9,ME9.9	HSP77_HUMAN	reviewed	Putative heat shock 70 kDa protein 7 (Heat shock 70 kDa protein B)	HSPA7 HSP70B	Homo sapiens (Human)	367
HPV-31_E1	P11498	PYC	0.0125148	0.89021	0.1025	0.344996	ME5.21,ME6.22,ME7.23,ME8.11,ME9.10	PYC_HUMAN	reviewed	Pyruvate carboxylase, mitochondrial (EC 6.4.1.1) (Pyruvic carboxylase) (PCB)	PC	Homo sapiens (Human)	1178
HPV-31_E1^E4	P11498	PYC	0.00988863	0.933595	0.0827713	0.344841	ME5.17,ME6.16,ME7.16,ME8.5,ME9.3	PYC_HUMAN	reviewed	Pyruvate carboxylase, mitochondrial (EC 6.4.1.1) (Pyruvic carboxylase) (PCB)	PC	Homo sapiens (Human)	1178
HPV-31_E6	P10412	H14	0.00757381	0.973565	0.0647782	0.344825	ME5.18,ME6.17,ME7.18,ME8.2,ME9.5	H14_HUMAN	reviewed	Histone H1.4 (Histone H1b) (Histone H1s-4)	HIST1H1E H1F4	Homo sapiens (Human)	219
HPV-31_E2	P62701	RS4X	0.00716218	0.825079	0.131519	0.344762	ME6.19,ME7.21,ME8.9,ME9.9	RS4X_HUMAN	reviewed	40S ribosomal protein S4, X isoform (SCR10) (Single copy abundant mRNA protein)	RPS4X CCG2 RPS4 SCAR	Homo sapiens (Human)	263
HPV-31_E7	P16403	H12	0.0138198	0.853225	0.118763	0.344741	ME5.19,ME6.23,ME7.19,ME8.8,ME9.8	H12_HUMAN	reviewed	Histone H1.2 (Histone H1c) (Histone H1d) (Histone H1s-1)	HIST1H1C H1F2	Homo sapiens (Human)	213
HPV-31_E6	O43283	M3K13	3.63299e-05	6.21335e-11	0.502884	0.344732	ME7.18	M3K13_HUMAN	reviewed	Mitogen-activated protein kinase kinase kinase 13 (EC 2.7.11.25) (Leucine zipper-bearing kinase) (Mixed lineage kinase) (MLK)	MAP3K13 LZK	Homo sapiens (Human)	966
HPV-31_E2	P11142	HSP7C	0.0218889	0.908503	0.0937864	0.344723	ME5.20,ME6.19,ME7.21,ME8.9,ME9.9	HSP7C_HUMAN	reviewed	Heat shock cognate 71 kDa protein (Heat shock 70 kDa protein 8)	HSPA8 HSC70 HSP73 HSPA10	Homo sapiens (Human)	646
HPV-31_E1^E4	Q3MHD2	LSM12	0.00778912	0.9647	0.0685946	0.344708	ME5.17,ME6.16,ME7.16,ME8.5,ME9.3	LSM12_HUMAN	reviewed	Protein LSM12 homolog	LSM12	Homo sapiens (Human)	195
HPV-31_E2	P14649	MYL6B	0.000466362	0.408712	0.318891	0.344706	ME7.21,ME9.9	MYL6B_HUMAN	reviewed	Myosin light chain 6B (Myosin light chain 1 slow-twitch muscle A isoform) (MLC1sa) (Smooth muscle and nonmuscle myosin light chain alkali 6B)	MYL6B MLC1SA	Homo sapiens (Human)	208
HPV-31_E1	A6NNZ2	TBB8L	0.00138865	6.21335e-11	0.502787	0.344674	ME6.22	TBB8L_HUMAN	reviewed	Tubulin beta-8 chain-like protein LOC260334		Homo sapiens (Human)	444
HPV-31_E8^E2C	P62263	RS14	0.00611064	0.849126	0.120539	0.344648	ME5.15,ME7.15,ME8.4,ME9.2	RS14_HUMAN	reviewed	40S ribosomal protein S14	RPS14 PRO2640	Homo sapiens (Human)	151
HPV-31_E1^E4	P61978	HNRPK	0.0022022	0.846334	0.121768	0.344606	ME6.16,ME7.16,ME8.5,ME9.3	HNRPK_HUMAN	reviewed	Heterogeneous nuclear ribonucleoprotein K (hnRNP K) (Transformation up-regulated nuclear protein) (TUNP)	HNRNPK HNRPK	Homo sapiens (Human)	463
HPV-31_L1	P22626	ROA2	0.0116222	0.826802	0.130442	0.344582	ME5.23,ME6.20,ME7.22,ME8.10,ME9.12	ROA2_HUMAN	reviewed	Heterogeneous nuclear ribonucleoproteins A2/B1 (hnRNP A2/B1)	HNRNPA2B1 HNRPA2B1	Homo sapiens (Human)	353
HPV-31_E1^E4	Q08211	DHX9	0.00175353	0.839109	0.1249	0.344521	ME6.16,ME7.16,ME8.5,ME9.3	DHX9_HUMAN	reviewed	ATP-dependent RNA helicase A (RHA) (EC 3.6.4.13) (DEAH box protein 9) (Leukophysin) (LKP) (Nuclear DNA helicase II) (NDH II)	DHX9 DDX9 LKP NDH2	Homo sapiens (Human)	1270
HPV-31_E6	P48741	HSP77	0.00459095	0.948807	0.075402	0.344452	ME5.18,ME6.17,ME7.18,ME8.2,ME9.5	HSP77_HUMAN	reviewed	Putative heat shock 70 kDa protein 7 (Heat shock 70 kDa protein B)	HSPA7 HSP70B	Homo sapiens (Human)	367
HPV-31_E5	Q9HAV7	GRPE1	0.000338436	6.21335e-11	0.502368	0.34438	ME9.6	GRPE1_HUMAN	reviewed	GrpE protein homolog 1, mitochondrial (HMGE) (Mt-GrpE#1)	GRPEL1 GREPEL1	Homo sapiens (Human)	217
HPV-31_L1	P16402	H13	0.00702713	0.807358	0.138651	0.344183	ME6.20,ME7.22,ME8.10,ME9.12	H13_HUMAN	reviewed	Histone H1.3 (Histone H1c) (Histone H1s-2)	HIST1H1D H1F3	Homo sapiens (Human)	221
HPV-31_E7	P62753	RS6	0.00380838	0.986836	0.0579005	0.344183	ME5.19,ME6.23,ME7.19,ME8.8,ME9.8	RS6_HUMAN	reviewed	40S ribosomal protein S6 (Phosphoprotein NP33)	RPS6 OK/SW-cl.2	Homo sapiens (Human)	249
HPV-31_E6	P62753	RS6	0.00433596	0.968933	0.0659216	0.344161	ME5.18,ME6.17,ME7.18,ME8.2,ME9.5	RS6_HUMAN	reviewed	40S ribosomal protein S6 (Phosphoprotein NP33)	RPS6 OK/SW-cl.2	Homo sapiens (Human)	249
HPV-31_L2	Q96HS1	PGAM5	0.00147844	0.860122	0.114875	0.34413	ME5.22,ME6.21,ME7.20,ME9.7	PGAM5_HUMAN	reviewed	Serine/threonine-protein phosphatase PGAM5, mitochondrial (EC 3.1.3.16) (Bcl-XL-binding protein v68) (Phosphoglycerate mutase family member 5)	PGAM5	Homo sapiens (Human)	289
HPV-31_E6	P11021	GRP78	0.0057209	0.953104	0.0729721	0.344118	ME5.18,ME6.17,ME7.18,ME8.2,ME9.5	GRP78_HUMAN	reviewed	78 kDa glucose-regulated protein (GRP-78) (Endoplasmic reticulum lumenal Ca(2+)-binding protein grp78) (Heat shock 70 kDa protein 5) (Immunoglobulin heavy chain-binding protein) (BiP)	HSPA5 GRP78	Homo sapiens (Human)	654
HPV-31_E1^E4	P62249	RS16	0.00570751	0.953975	0.0724994	0.344063	ME5.17,ME6.16,ME7.16,ME8.5,ME9.3	RS16_HUMAN	reviewed	40S ribosomal protein S16	RPS16	Homo sapiens (Human)	146
HPV-31_L1	P18124	RL7	0.0057604	0.849054	0.119473	0.343893	ME6.20,ME7.22,ME8.10,ME9.12	RL7_HUMAN	reviewed	60S ribosomal protein L7	RPL7	Homo sapiens (Human)	248
HPV-31_E6	Q14980	NUMA1	5.12388e-05	6.21335e-11	0.501653	0.343888	ME8.2	NUMA1_HUMAN	reviewed	Nuclear mitotic apparatus protein 1 (NuMA protein) (SP-H antigen)	NUMA1 NUMA	Homo sapiens (Human)	2115
HPV-31_E5	P10412	H14	0.00828195	0.956926	0.0708348	0.343848	ME5.14,ME6.18,ME7.17,ME8.6,ME9.6	H14_HUMAN	reviewed	Histone H1.4 (Histone H1b) (Histone H1s-4)	HIST1H1E H1F4	Homo sapiens (Human)	219
HPV-31_E1	P11021	GRP78	0.00620059	0.922045	0.0863975	0.343742	ME5.21,ME6.22,ME7.23,ME8.11,ME9.10	GRP78_HUMAN	reviewed	78 kDa glucose-regulated protein (GRP-78) (Endoplasmic reticulum lumenal Ca(2+)-binding protein grp78) (Heat shock 70 kDa protein 5) (Immunoglobulin heavy chain-binding protein) (BiP)	HSPA5 GRP78	Homo sapiens (Human)	654
HPV-31_E1	P11940	PABP1	0.00827799	0.93363	0.0810287	0.343648	ME5.21,ME6.22,ME7.23,ME8.11,ME9.10	PABP1_HUMAN	reviewed	Polyadenylate-binding protein 1 (PABP-1) (Poly(A)-binding protein 1)	PABPC1 PAB1 PABP1 PABPC2	Homo sapiens (Human)	636
HPV-31_L2	O00161	SNP23	0.00451772	0.93768	0.0792029	0.343624	ME5.22,ME6.21,ME7.20,ME8.7,ME9.7	SNP23_HUMAN	reviewed	Synaptosomal-associated protein 23 (SNAP-23) (Vesicle-membrane fusion protein SNAP-23)	SNAP23	Homo sapiens (Human)	211
HPV-31_E7	P19338	NUCL	0.00831873	0.904374	0.093682	0.343296	ME5.19,ME6.23,ME7.19,ME8.8,ME9.8	NUCL_HUMAN	reviewed	Nucleolin (Protein C23)	NCL	Homo sapiens (Human)	710
HPV-31_E1^E4	Q07020	RL18	0.00572192	0.925236	0.0841057	0.343153	ME5.17,ME6.16,ME7.16,ME8.5,ME9.3	RL18_HUMAN	reviewed	60S ribosomal protein L18	RPL18	Homo sapiens (Human)	188
HPV-31_E6	P11142	HSP7C	0.0174211	0.96184	0.0673101	0.343002	ME5.18,ME6.17,ME7.18,ME8.2,ME9.5	HSP7C_HUMAN	reviewed	Heat shock cognate 71 kDa protein (Heat shock 70 kDa protein 8)	HSPA8 HSC70 HSP73 HSPA10	Homo sapiens (Human)	646
HPV-31_E7	P38646	GRP75	0.00796972	0.919912	0.0860978	0.342889	ME5.19,ME6.23,ME7.19,ME8.8,ME9.8	GRP75_HUMAN	reviewed	Stress-70 protein, mitochondrial (75 kDa glucose-regulated protein) (GRP-75) (Heat shock 70 kDa protein 9) (Mortalin) (MOT) (Peptide-binding protein 74) (PBP74)	HSPA9 GRP75 HSPA9B	Homo sapiens (Human)	679
HPV-31_E1	Q07020	RL18	0.00787054	0.860999	0.112146	0.342568	ME5.21,ME6.22,ME7.23,ME8.11,ME9.10	RL18_HUMAN	reviewed	60S ribosomal protein L18	RPL18	Homo sapiens (Human)	188
HPV-31_E5	Q13405	RM49	0.00215938	0.415627	0.3123	0.342331	ME5.14,ME6.18	RM49_HUMAN	reviewed	39S ribosomal protein L49, mitochondrial (L49mt) (MRP-L49) (Neighbor of FAU) (NOF) (Protein NOF1)	MRPL49 C11orf4 NOF1 OK/SW-cl.67	Homo sapiens (Human)	166
HPV-31_L1	P42766	RL35	0.00464275	0.794995	0.141245	0.342132	ME6.20,ME7.22,ME8.10,ME9.12	RL35_HUMAN	reviewed	60S ribosomal protein L35	RPL35	Homo sapiens (Human)	123
HPV-31_E5	P16615	AT2A2	0.000281745	0.430676	0.30502	0.341972	ME6.18,ME7.17	AT2A2_HUMAN	reviewed	Sarcoplasmic/endoplasmic reticulum calcium ATPase 2 (SERCA2) (SR Ca(2+)-ATPase 2) (EC 3.6.3.8) (Calcium pump 2) (Calcium-transporting ATPase sarcoplasmic reticulum type, slow twitch skeletal muscle isoform) (Endoplasmic reticulum class 1/2 Ca(2+) ATPase)	ATP2A2 ATP2B	Homo sapiens (Human)	1042
HPV-31_E5	Q14980	NUMA1	5.09011e-05	6.21335e-11	0.498347	0.341622	ME8.6	NUMA1_HUMAN	reviewed	Nuclear mitotic apparatus protein 1 (NuMA protein) (SP-H antigen)	NUMA1 NUMA	Homo sapiens (Human)	2115
HPV-31_E8^E2C	P02461	CO3A1	8.52207e-05	6.21335e-11	0.498142	0.341482	ME9.2	CO3A1_HUMAN	reviewed	Collagen alpha-1(III) chain	COL3A1	Homo sapiens (Human)	1466
HPV-31_E1	Q9H4B7	TBB1	0.00133294	0.662588	0.199904	0.341472	ME6.22,ME7.23,ME8.11	TBB1_HUMAN	reviewed	Tubulin beta-1 chain	TUBB1	Homo sapiens (Human)	451
HPV-31_E2	P26373	RL13	0.0051534	0.844646	0.117849	0.341416	ME5.20,ME6.19,ME7.21,ME9.9	RL13_HUMAN	reviewed	60S ribosomal protein L13 (Breast basic conserved protein 1)	RPL13 BBC1 OK/SW-cl.46	Homo sapiens (Human)	211
HPV-31_E6	P34931	HS71L	0.00637172	0.95024	0.0700903	0.341263	ME5.18,ME6.17,ME7.18,ME8.2,ME9.5	HS71L_HUMAN	reviewed	Heat shock 70 kDa protein 1-like (Heat shock 70 kDa protein 1L) (Heat shock 70 kDa protein 1-Hom) (HSP70-Hom)	HSPA1L	Homo sapiens (Human)	641
HPV-31_L1	P62263	RS14	0.00683263	0.839024	0.120074	0.341217	ME6.20,ME7.22,ME8.10,ME9.12	RS14_HUMAN	reviewed	40S ribosomal protein S14	RPS14 PRO2640	Homo sapiens (Human)	151
HPV-31_E1^E4	Q9HAV7	GRPE1	0.000335245	6.21335e-11	0.497632	0.341134	ME7.16	GRPE1_HUMAN	reviewed	GrpE protein homolog 1, mitochondrial (HMGE) (Mt-GrpE#1)	GRPEL1 GREPEL1	Homo sapiens (Human)	217
HPV-31_E7	P32119	PRDX2	0.000572479	0.366497	0.33258	0.341066	ME6.23,ME7.19	PRDX2_HUMAN	reviewed	Peroxiredoxin-2 (EC 1.11.1.15) (Natural killer cell-enhancing factor B) (NKEF-B) (PRP) (Thiol-specific antioxidant protein) (TSA) (Thioredoxin peroxidase 1) (Thioredoxin-dependent peroxide reductase 1)	PRDX2 NKEFB TDPX1	Homo sapiens (Human)	198
HPV-31_E7	A6NNZ2	TBB8L	0.00137326	6.21335e-11	0.497213	0.340852	ME6.23	TBB8L_HUMAN	reviewed	Tubulin beta-8 chain-like protein LOC260334		Homo sapiens (Human)	444
HPV-31_E1^E4	P11021	GRP78	0.00663034	0.900574	0.0918357	0.340848	ME5.17,ME6.16,ME7.16,ME8.5,ME9.3	GRP78_HUMAN	reviewed	78 kDa glucose-regulated protein (GRP-78) (Endoplasmic reticulum lumenal Ca(2+)-binding protein grp78) (Heat shock 70 kDa protein 5) (Immunoglobulin heavy chain-binding protein) (BiP)	HSPA5 GRP78	Homo sapiens (Human)	654
HPV-31_E2	P62847	RS24	0.00513225	0.860626	0.10977	0.340808	ME6.19,ME7.21,ME8.9,ME9.9	RS24_HUMAN	reviewed	40S ribosomal protein S24	RPS24	Homo sapiens (Human)	133
HPV-31_E2	O43283	M3K13	3.59133e-05	6.21335e-11	0.497116	0.340779	ME7.21	M3K13_HUMAN	reviewed	Mitogen-activated protein kinase kinase kinase 13 (EC 2.7.11.25) (Leucine zipper-bearing kinase) (Mixed lineage kinase) (MLK)	MAP3K13 LZK	Homo sapiens (Human)	966
HPV-31_E8^E2C	P61313	RL15	0.0036714	0.833574	0.121634	0.340585	ME5.15,ME6.15,ME7.15,ME9.2	RL15_HUMAN	reviewed	60S ribosomal protein L15	RPL15 EC45 TCBAP0781	Homo sapiens (Human)	204
HPV-31_E7	O00161	SNP23	0.00454892	0.926243	0.0797499	0.34047	ME5.19,ME6.23,ME7.19,ME8.8,ME9.8	SNP23_HUMAN	reviewed	Synaptosomal-associated protein 23 (SNAP-23) (Vesicle-membrane fusion protein SNAP-23)	SNAP23	Homo sapiens (Human)	211
HPV-31_L1	P26373	RL13	0.00552367	0.854845	0.111851	0.340453	ME6.20,ME7.22,ME8.10,ME9.12	RL13_HUMAN	reviewed	60S ribosomal protein L13 (Breast basic conserved protein 1)	RPL13 BBC1 OK/SW-cl.46	Homo sapiens (Human)	211
HPV-31_E8^E2C	P19338	NUCL	0.00818744	0.87238	0.103767	0.340337	ME5.15,ME6.15,ME7.15,ME8.4,ME9.2	NUCL_HUMAN	reviewed	Nucleolin (Protein C23)	NCL	Homo sapiens (Human)	710
HPV-31_L1	P47914	RL29	0.00483569	0.818084	0.128135	0.34027	ME5.23,ME6.20,ME7.22,ME8.10,ME9.12	RL29_HUMAN	reviewed	60S ribosomal protein L29 (Cell surface heparin-binding protein HIP)	RPL29	Homo sapiens (Human)	159
HPV-31_E7	O75821	EIF3G	0.00104589	0.831092	0.122006	0.340059	ME6.23,ME7.19,ME8.8,ME9.8	EIF3G_HUMAN	reviewed	Eukaryotic translation initiation factor 3 subunit G (eIF3g) (Eukaryotic translation initiation factor 3 RNA-binding subunit) (eIF-3 RNA-binding subunit) (Eukaryotic translation initiation factor 3 subunit 4) (eIF-3-delta) (eIF3 p42) (eIF3 p44)	EIF3G EIF3S4	Homo sapiens (Human)	320
HPV-31_E6	P18124	RL7	0.00329007	0.950443	0.0682375	0.340037	ME5.18,ME6.17,ME7.18,ME8.2,ME9.5	RL7_HUMAN	reviewed	60S ribosomal protein L7	RPL7	Homo sapiens (Human)	248
HPV-31_E6	Q07020	RL18	0.00531545	0.946174	0.0700295	0.339961	ME5.18,ME6.17,ME7.18,ME8.2,ME9.5	RL18_HUMAN	reviewed	60S ribosomal protein L18	RPL18	Homo sapiens (Human)	188
HPV-31_E1^E4	P23246	SFPQ	0.00136669	0.806892	0.132477	0.339772	ME6.16,ME7.16,ME8.5,ME9.3	SFPQ_HUMAN	reviewed	Splicing factor, proline- and glutamine-rich (100 kDa DNA-pairing protein) (hPOMp100) (DNA-binding p52/p100 complex, 100 kDa subunit) (Polypyrimidine tract-binding protein-associated-splicing factor) (PSF) (PTB-associated-splicing factor)	SFPQ PSF	Homo sapiens (Human)	707
HPV-31_E2	P30050	RL12	0.00751219	0.808638	0.13153	0.339699	ME5.20,ME7.21,ME8.9,ME9.9	RL12_HUMAN	reviewed	60S ribosomal protein L12	RPL12	Homo sapiens (Human)	165
HPV-31_E5	P62191	PRS4	0.000909321	0.40821	0.311741	0.339652	ME7.17,ME9.6	PRS4_HUMAN	reviewed	26S protease regulatory subunit 4 (P26s4) (26S proteasome AAA-ATPase subunit RPT2) (Proteasome 26S subunit ATPase 1)	PSMC1	Homo sapiens (Human)	440
HPV-31_L2	P51571	SSRD	0.000497042	0.384386	0.322369	0.339585	ME6.21,ME7.20	SSRD_HUMAN	reviewed	Translocon-associated protein subunit delta (TRAP-delta) (Signal sequence receptor subunit delta) (SSR-delta)	SSR4 TRAPD	Homo sapiens (Human)	173
HPV-31_L2	Q07020	RL18	0.00511521	0.950622	0.0673914	0.339523	ME5.22,ME6.21,ME7.20,ME8.7,ME9.7	RL18_HUMAN	reviewed	60S ribosomal protein L18	RPL18	Homo sapiens (Human)	188
HPV-31_E7	P62633	CNBP	0.000950623	0.346806	0.339185	0.33952	ME6.23,ME7.19	CNBP_HUMAN	reviewed	Cellular nucleic acid-binding protein (CNBP) (Zinc finger protein 9)	CNBP RNF163 ZNF9	Homo sapiens (Human)	177
HPV-31_E1^E4	P31942	HNRH3	0.0012081	0.646769	0.204019	0.339412	ME7.16,ME8.5,ME9.3	HNRH3_HUMAN	reviewed	Heterogeneous nuclear ribonucleoprotein H3 (hnRNP H3) (Heterogeneous nuclear ribonucleoprotein 2H9) (hnRNP 2H9)	HNRNPH3 HNRPH3	Homo sapiens (Human)	346
HPV-31_L1	P62906	RL10A	0.00377274	0.82918	0.121874	0.339395	ME6.20,ME7.22,ME8.10,ME9.12	RL10A_HUMAN	reviewed	60S ribosomal protein L10a (CSA-19) (Neural precursor cell expressed developmentally down-regulated protein 6) (NEDD-6)	RPL10A NEDD6	Homo sapiens (Human)	217
HPV-31_L2	P62829	RL23	0.00608361	0.980814	0.0535527	0.339358	ME5.22,ME6.21,ME7.20,ME8.7,ME9.7	RL23_HUMAN	reviewed	60S ribosomal protein L23 (60S ribosomal protein L17)	RPL23	Homo sapiens (Human)	140
HPV-31_E1	P62857	RS28	0.0126032	0.89901	0.090252	0.339315	ME5.21,ME6.22,ME7.23,ME8.11,ME9.10	RS28_HUMAN	reviewed	40S ribosomal protein S28	RPS28	Homo sapiens (Human)	69
HPV-31_E6	C9JLW8	F195B	0.0230561	0.933607	0.0740896	0.338972	ME5.18,ME6.17,ME7.18,ME8.2,ME9.5	F195B_HUMAN	reviewed	Protein FAM195B	FAM195B	Homo sapiens (Human)	97
HPV-31_E6	P22626	ROA2	0.00784694	0.901948	0.0880701	0.338698	ME5.18,ME6.17,ME7.18,ME8.2,ME9.5	ROA2_HUMAN	reviewed	Heterogeneous nuclear ribonucleoproteins A2/B1 (hnRNP A2/B1)	HNRNPA2B1 HNRPA2B1	Homo sapiens (Human)	353
HPV-31_L1	P62750	RL23A	0.00419147	0.772983	0.145899	0.338529	ME6.20,ME7.22,ME8.10,ME9.12	RL23A_HUMAN	reviewed	60S ribosomal protein L23a	RPL23A	Homo sapiens (Human)	156
HPV-31_E1	P42704	LPPRC	6.99764e-05	6.21335e-11	0.493588	0.33836	ME7.23	LPPRC_HUMAN	reviewed	Leucine-rich PPR motif-containing protein, mitochondrial (130 kDa leucine-rich protein) (LRP 130) (GP130)	LRPPRC LRP130	Homo sapiens (Human)	1394
HPV-31_L2	P32969	RL9	0.00185681	0.834123	0.11807	0.338301	ME6.21,ME7.20,ME8.7,ME9.7	RL9_HUMAN	reviewed	60S ribosomal protein L9	RPL9 OK/SW-cl.103; RPL9P7; RPL9P8; RPL9P9	Homo sapiens (Human)	192
HPV-31_L1	P16401	H15	0.00411468	0.860199	0.106229	0.338243	ME6.20,ME7.22,ME8.10,ME9.12	H15_HUMAN	reviewed	Histone H1.5 (Histone H1a) (Histone H1b) (Histone H1s-3)	HIST1H1B H1F5	Homo sapiens (Human)	226
HPV-31_E5	P62241	RS8	0.00761251	0.961103	0.0607572	0.338224	ME5.14,ME6.18,ME7.17,ME8.6,ME9.6	RS8_HUMAN	reviewed	40S ribosomal protein S8	RPS8 OK/SW-cl.83	Homo sapiens (Human)	208
HPV-31_L1	Q07020	RL18	0.00538083	0.938581	0.0708908	0.338209	ME5.23,ME6.20,ME7.22,ME8.10,ME9.12	RL18_HUMAN	reviewed	60S ribosomal protein L18	RPL18	Homo sapiens (Human)	188
HPV-31_E6	P62269	RS18	0.00654874	0.958772	0.0616721	0.338126	ME5.18,ME6.17,ME7.18,ME8.2,ME9.5	RS18_HUMAN	reviewed	40S ribosomal protein S18 (Ke-3) (Ke3)	RPS18 D6S218E	Homo sapiens (Human)	152
HPV-31_E8^E2C	Q02878	RL6	0.00397979	0.858385	0.106719	0.338018	ME5.15,ME7.15,ME8.4,ME9.2	RL6_HUMAN	reviewed	60S ribosomal protein L6 (Neoplasm-related protein C140) (Tax-responsive enhancer element-binding protein 107) (TaxREB107)	RPL6 TXREB1	Homo sapiens (Human)	288
HPV-31_L1	Q99729	ROAA	0.00205134	0.682546	0.185773	0.337947	ME6.20,ME7.22,ME8.10	ROAA_HUMAN	reviewed	Heterogeneous nuclear ribonucleoprotein A/B (hnRNP A/B) (APOBEC1-binding protein 1) (ABBP-1)	HNRNPAB ABBP1 HNRPAB	Homo sapiens (Human)	332
HPV-31_L1	Q9BQ67	GRWD1	0.000402264	0.367532	0.327513	0.33791	ME7.22,ME9.12	GRWD1_HUMAN	reviewed	Glutamate-rich WD repeat-containing protein 1	GRWD1 GRWD KIAA1942 WDR28	Homo sapiens (Human)	446
HPV-31_E6	Q86VP6	CAND1	2.88528e-05	6.21335e-11	0.492798	0.337818	ME7.18	CAND1_HUMAN	reviewed	Cullin-associated NEDD8-dissociated protein 1 (Cullin-associated and neddylation-dissociated protein 1) (TBP-interacting protein of 120 kDa A) (TBP-interacting protein 120A) (p120 CAND1)	CAND1 KIAA0829 TIP120 TIP120A	Homo sapiens (Human)	1230
HPV-31_E6	Q9Y4A5	TRRAP	8.98658e-06	6.21335e-11	0.492798	0.337818	ME7.18	TRRAP_HUMAN	reviewed	Transformation/transcription domain-associated protein (350/400 kDa PCAF-associated factor) (PAF350/400) (STAF40) (Tra1 homolog)	TRRAP PAF400	Homo sapiens (Human)	3859
HPV-31_E1	P62899	RL31	0.008824	0.84218	0.11356	0.337737	ME5.21,ME6.22,ME7.23,ME8.11,ME9.10	RL31_HUMAN	reviewed	60S ribosomal protein L31	RPL31	Homo sapiens (Human)	125
HPV-31_E6	Q9NX20	RM16	0.000138561	6.21335e-11	0.492232	0.33743	ME7.18	RM16_HUMAN	reviewed	39S ribosomal protein L16, mitochondrial (L16mt) (MRP-L16)	MRPL16 PNAS-111	Homo sapiens (Human)	251
HPV-31_E1	Q14240	IF4A2	0.000159012	6.21335e-11	0.492165	0.337385	ME7.23	IF4A2_HUMAN	reviewed	Eukaryotic initiation factor 4A-II (eIF-4A-II) (eIF4A-II) (EC 3.6.4.13) (ATP-dependent RNA helicase eIF4A-2)	EIF4A2 DDX2B EIF4F	Homo sapiens (Human)	407
HPV-31_E8^E2C	P46778	RL21	0.00383717	0.848696	0.110118	0.337358	ME5.15,ME7.15,ME8.4,ME9.2	RL21_HUMAN	reviewed	60S ribosomal protein L21	RPL21	Homo sapiens (Human)	160
HPV-31_E8^E2C	Q96DU9	PABP5	0.000409515	6.21335e-11	0.492031	0.337295	ME9.2	PABP5_HUMAN	reviewed	Polyadenylate-binding protein 5 (PABP-5) (Poly(A)-binding protein 5)	PABPC5 PABP5	Homo sapiens (Human)	382
HPV-31_E1^E4	Q14103	HNRPD	0.00150563	0.852224	0.108431	0.337276	ME5.17,ME7.16,ME8.5,ME9.3	HNRPD_HUMAN	reviewed	Heterogeneous nuclear ribonucleoprotein D0 (hnRNP D0) (AU-rich element RNA-binding protein 1)	HNRNPD AUF1 HNRPD	Homo sapiens (Human)	355
HPV-31_E1^E4	Q9H9J2	RM44	0.000306096	6.21335e-11	0.492002	0.337274	ME5.17	RM44_HUMAN	reviewed	39S ribosomal protein L44, mitochondrial (L44mt) (MRP-L44) (EC 3.1.26.-)	MRPL44	Homo sapiens (Human)	332
HPV-31_L2	Q9Y5A9	YTHD2	0.000919931	0.651199	0.19883	0.33722	ME5.22,ME6.21,ME7.20	YTHD2_HUMAN	reviewed	YTH domain family protein 2 (CLL-associated antigen KW-14) (High-glucose-regulated protein 8) (Renal carcinoma antigen NY-REN-2)	YTHDF2 HGRG8	Homo sapiens (Human)	579
HPV-31_L2	P46782	RS5	0.00278939	0.816096	0.124456	0.337123	ME6.21,ME7.20,ME8.7,ME9.7	RS5_HUMAN	reviewed	40S ribosomal protein S5 [Cleaved into: 40S ribosomal protein S5, N-terminally processed]	RPS5	Homo sapiens (Human)	204
HPV-31_E2	Q12906	ILF3	0.00169136	0.823006	0.121262	0.337058	ME5.20,ME7.21,ME8.9,ME9.9	ILF3_HUMAN	reviewed	Interleukin enhancer-binding factor 3 (Double-stranded RNA-binding protein 76) (DRBP76) (M-phase phosphoprotein 4) (MPP4) (Nuclear factor associated with dsRNA) (NFAR) (Nuclear factor of activated T-cells 90 kDa) (NF-AT-90) (Translational control protein 80) (TCP80)	ILF3 DRBF MPHOSPH4 NF90	Homo sapiens (Human)	894
HPV-31_E5	P55036	PSMD4	0.00149528	0.577301	0.231578	0.336873	ME7.17,ME8.6,ME9.6	PSMD4_HUMAN	reviewed	26S proteasome non-ATPase regulatory subunit 4 (26S proteasome regulatory subunit RPN10) (26S proteasome regulatory subunit S5A) (Antisecretory factor 1) (AF) (ASF) (Multiubiquitin chain-binding protein)	PSMD4 MCB1	Homo sapiens (Human)	377
HPV-31_E1	P68371	TBB4B	0.0130929	0.84303	0.111809	0.336824	ME6.22,ME7.23,ME8.11,ME9.10	TBB4B_HUMAN	reviewed	Tubulin beta-4B chain (Tubulin beta-2 chain) (Tubulin beta-2C chain)	TUBB4B TUBB2C	Homo sapiens (Human)	445
HPV-31_E5	P25789	PSA4	0.000821914	0.395806	0.31303	0.336708	ME6.18,ME7.17	PSA4_HUMAN	reviewed	Proteasome subunit alpha type-4 (EC 3.4.25.1) (Macropain subunit C9) (Multicatalytic endopeptidase complex subunit C9) (Proteasome component C9) (Proteasome subunit L)	PSMA4 HC9 PSC9	Homo sapiens (Human)	261
HPV-31_E7	Q15365	PCBP1	0.00232683	0.669051	0.189705	0.336481	ME6.23,ME7.19,ME9.8	PCBP1_HUMAN	reviewed	Poly(rC)-binding protein 1 (Alpha-CP1) (Heterogeneous nuclear ribonucleoprotein E1) (hnRNP E1) (Nucleic acid-binding protein SUB2.3)	PCBP1	Homo sapiens (Human)	356
HPV-31_L2	P62750	RL23A	0.00361118	0.811096	0.1257	0.336438	ME5.22,ME6.21,ME7.20,ME9.7	RL23A_HUMAN	reviewed	60S ribosomal protein L23a	RPL23A	Homo sapiens (Human)	156
HPV-31_E1	P15880	RS2	0.00627821	0.859367	0.10386	0.336375	ME6.22,ME7.23,ME8.11,ME9.10	RS2_HUMAN	reviewed	40S ribosomal protein S2 (40S ribosomal protein S4) (Protein LLRep3)	RPS2 RPS4	Homo sapiens (Human)	293
HPV-31_E2	P17066	HSP76	0.00525662	0.893777	0.0882054	0.336254	ME5.20,ME6.19,ME7.21,ME8.9,ME9.9	HSP76_HUMAN	reviewed	Heat shock 70 kDa protein 6 (Heat shock 70 kDa protein B')	HSPA6 HSP70B'	Homo sapiens (Human)	643
HPV-31_L1	P68363	TBA1B	0.00797364	0.967144	0.0548932	0.33607	ME5.23,ME6.20,ME7.22,ME8.10,ME9.12	TBA1B_HUMAN	reviewed	Tubulin alpha-1B chain (Alpha-tubulin ubiquitous) (Tubulin K-alpha-1) (Tubulin alpha-ubiquitous chain)	TUBA1B	Homo sapiens (Human)	451
HPV-31_E8^E2C	P14866	HNRPL	0.00157939	0.843519	0.110548	0.336042	ME5.15,ME7.15,ME8.4,ME9.2	HNRPL_HUMAN	reviewed	Heterogeneous nuclear ribonucleoprotein L (hnRNP L)	HNRNPL HNRPL P/OKcl.14	Homo sapiens (Human)	589
HPV-31_E2	O15234	CASC3	5.09937e-05	6.21335e-11	0.489915	0.335842	ME7.21	CASC3_HUMAN	reviewed	Protein CASC3 (Cancer susceptibility candidate gene 3 protein) (Metastatic lymph node gene 51 protein) (MLN 51) (Protein barentsz) (Btz)	CASC3 MLN51	Homo sapiens (Human)	703
HPV-31_E5	C9JLW8	F195B	0.0358882	0.831289	0.115325	0.335748	ME5.14,ME6.18,ME7.17,ME8.6,ME9.6	F195B_HUMAN	reviewed	Protein FAM195B	FAM195B	Homo sapiens (Human)	97
HPV-31_L1	Q13283	G3BP1	0.00278073	0.830078	0.11606	0.335681	ME6.20,ME7.22,ME8.10,ME9.12	G3BP1_HUMAN	reviewed	Ras GTPase-activating protein-binding protein 1 (G3BP-1) (EC 3.6.4.12) (EC 3.6.4.13) (ATP-dependent DNA helicase VIII) (hDH VIII) (GAP SH3 domain-binding protein 1)	G3BP1 G3BP	Homo sapiens (Human)	466
HPV-31_E2	Q6UN15	FIP1	0.000117015	6.21335e-11	0.489632	0.335648	ME7.21	FIP1_HUMAN	reviewed	Pre-mRNA 3'-end-processing factor FIP1 (hFip1) (FIP1-like 1 protein) (Factor interacting with PAP) (Rearranged in hypereosinophilia)	FIP1L1 FIP1 RHE	Homo sapiens (Human)	594
HPV-31_L1	P07437	TBB5	0.0112595	0.956274	0.0591401	0.335648	ME5.23,ME6.20,ME7.22,ME8.10,ME9.12	TBB5_HUMAN	reviewed	Tubulin beta chain (Tubulin beta-5 chain)	TUBB TUBB5 OK/SW-cl.56	Homo sapiens (Human)	444
HPV-31_E6	P08107	HSP71	0.0120005	0.938335	0.0668278	0.335387	ME5.18,ME6.17,ME7.18,ME8.2,ME9.5	HSP71_HUMAN	reviewed	Heat shock 70 kDa protein 1A/1B (Heat shock 70 kDa protein 1/2) (HSP70-1/HSP70-2) (HSP70.1/HSP70.2)	HSPA1A HSPA1; HSPA1B	Homo sapiens (Human)	641
HPV-31_E7	Q6P2Q9	PRP8	3.31304e-05	6.21335e-11	0.489158	0.335323	ME6.23	PRP8_HUMAN	reviewed	Pre-mRNA-processing-splicing factor 8 (220 kDa U5 snRNP-specific protein) (PRP8 homolog) (Splicing factor Prp8) (p220)	PRPF8 PRPC8	Homo sapiens (Human)	2335
HPV-31_E6	O43933	PEX1	0.000290355	0.558755	0.237622	0.335286	ME6.17,ME7.18,ME8.2	PEX1_HUMAN	reviewed	Peroxisome biogenesis factor 1 (Peroxin-1) (Peroxisome biogenesis disorder protein 1)	PEX1	Homo sapiens (Human)	1283
HPV-31_E2	P60709	ACTB	0.00619043	0.793194	0.131841	0.335139	ME5.20,ME6.19,ME7.21,ME9.9	ACTB_HUMAN	reviewed	Actin, cytoplasmic 1 (Beta-actin) [Cleaved into: Actin, cytoplasmic 1, N-terminally processed]	ACTB	Homo sapiens (Human)	375
HPV-31_E7	P83731	RL24	0.00407816	0.957721	0.057765	0.335108	ME5.19,ME6.23,ME7.19,ME8.8,ME9.8	RL24_HUMAN	reviewed	60S ribosomal protein L24 (60S ribosomal protein L30)	RPL24	Homo sapiens (Human)	157
HPV-31_E7	P50914	RL14	0.00727424	0.748384	0.151873	0.335053	ME5.19,ME6.23,ME7.19,ME8.8,ME9.8	RL14_HUMAN	reviewed	60S ribosomal protein L14 (CAG-ISL 7)	RPL14	Homo sapiens (Human)	215
HPV-31_E1	P17066	HSP76	0.00550818	0.882078	0.0917079	0.335047	ME5.21,ME6.22,ME7.23,ME8.11,ME9.10	HSP76_HUMAN	reviewed	Heat shock 70 kDa protein 6 (Heat shock 70 kDa protein B')	HSPA6 HSP70B'	Homo sapiens (Human)	643
HPV-31_E5	Q9NP92	RT30	0.000323945	0.430666	0.294485	0.334747	ME7.17,ME9.6	RT30_HUMAN	reviewed	28S ribosomal protein S30, mitochondrial (MRP-S30) (S30mt) (Programmed cell death protein 9)	MRPS30 PDCD9 BM-047	Homo sapiens (Human)	439
HPV-31_E1	P30050	RL12	0.00598383	0.855546	0.10307	0.334653	ME5.21,ME7.23,ME8.11,ME9.10	RL12_HUMAN	reviewed	60S ribosomal protein L12	RPL12	Homo sapiens (Human)	165
HPV-31_E8^E2C	P23396	RS3	0.0059323	0.859159	0.101269	0.334532	ME5.15,ME7.15,ME8.4,ME9.2	RS3_HUMAN	reviewed	40S ribosomal protein S3	RPS3 OK/SW-cl.26	Homo sapiens (Human)	243
HPV-31_E7	Q3MHD2	LSM12	0.0128695	0.853818	0.10351	0.334462	ME5.19,ME6.23,ME7.19,ME8.8,ME9.8	LSM12_HUMAN	reviewed	Protein LSM12 homolog	LSM12	Homo sapiens (Human)	195
HPV-31_E1	P61313	RL15	0.0031478	0.848109	0.105836	0.334238	ME5.21,ME7.23,ME8.11,ME9.10	RL15_HUMAN	reviewed	60S ribosomal protein L15	RPL15 EC45 TCBAP0781	Homo sapiens (Human)	204
HPV-31_E1	P08107	HSP71	0.0160338	0.865817	0.0977372	0.334226	ME5.21,ME6.22,ME7.23,ME8.11,ME9.10	HSP71_HUMAN	reviewed	Heat shock 70 kDa protein 1A/1B (Heat shock 70 kDa protein 1/2) (HSP70-1/HSP70-2) (HSP70.1/HSP70.2)	HSPA1A HSPA1; HSPA1B	Homo sapiens (Human)	641
HPV-31_E7	P10412	H14	0.0130158	0.835069	0.111323	0.334034	ME5.19,ME6.23,ME7.19,ME8.8,ME9.8	H14_HUMAN	reviewed	Histone H1.4 (Histone H1b) (Histone H1s-4)	HIST1H1E H1F4	Homo sapiens (Human)	219
HPV-31_E2	Q9HC36	RMTL1	0.00030775	0.428895	0.294098	0.333936	ME7.21,ME9.9	RMTL1_HUMAN	reviewed	RNA methyltransferase-like protein 1 (EC 2.1.1.-)	RNMTL1 HC90	Homo sapiens (Human)	420
HPV-31_E2	P39023	RL3	0.00445875	0.848321	0.105168	0.333853	ME5.20,ME7.21,ME8.9,ME9.9	RL3_HUMAN	reviewed	60S ribosomal protein L3 (HIV-1 TAR RNA-binding protein B) (TARBP-B)	RPL3 OK/SW-cl.32	Homo sapiens (Human)	403
HPV-31_L1	P61254	RL26	0.00479506	0.829021	0.113601	0.333681	ME6.20,ME7.22,ME8.10,ME9.12	RL26_HUMAN	reviewed	60S ribosomal protein L26	RPL26	Homo sapiens (Human)	145
HPV-31_E1^E4	P62269	RS18	0.0063286	0.93064	0.0673643	0.333347	ME5.17,ME6.16,ME7.16,ME8.5,ME9.3	RS18_HUMAN	reviewed	40S ribosomal protein S18 (Ke-3) (Ke3)	RPS18 D6S218E	Homo sapiens (Human)	152
HPV-31_E1^E4	P23588	IF4B	0.000335261	0.676951	0.181523	0.333298	ME7.16,ME8.5,ME9.3	IF4B_HUMAN	reviewed	Eukaryotic translation initiation factor 4B (eIF-4B)	EIF4B	Homo sapiens (Human)	611
HPV-31_E1	P26373	RL13	0.00582975	0.7905	0.13029	0.333243	ME5.21,ME7.23,ME8.11,ME9.10	RL13_HUMAN	reviewed	60S ribosomal protein L13 (Breast basic conserved protein 1)	RPL13 BBC1 OK/SW-cl.46	Homo sapiens (Human)	211
HPV-31_E7	Q07020	RL18	0.0103521	0.776238	0.136386	0.333049	ME5.19,ME6.23,ME7.19,ME8.8,ME9.8	RL18_HUMAN	reviewed	60S ribosomal protein L18	RPL18	Homo sapiens (Human)	188
HPV-31_E2	P34931	HS71L	0.00738923	0.877983	0.0904003	0.332898	ME5.20,ME6.19,ME7.21,ME8.9,ME9.9	HS71L_HUMAN	reviewed	Heat shock 70 kDa protein 1-like (Heat shock 70 kDa protein 1L) (Heat shock 70 kDa protein 1-Hom) (HSP70-Hom)	HSPA1L	Homo sapiens (Human)	641
HPV-31_E5	O60814	H2B1K	0.013568	0.879615	0.089551	0.332857	ME5.14,ME6.18,ME7.17,ME8.6,ME9.6	H2B1K_HUMAN	reviewed	Histone H2B type 1-K (H2B K) (HIRA-interacting protein 1)	HIST1H2BK H2BFT HIRIP1	Homo sapiens (Human)	126
HPV-31_L1	Q9BXP5	SRRT	3.56057e-05	6.21335e-11	0.48541	0.332754	ME7.22	SRRT_HUMAN	reviewed	Serrate RNA effector molecule homolog (Arsenite-resistance protein 2)	SRRT ARS2 ASR2	Homo sapiens (Human)	876
HPV-31_E6	O00161	SNP23	0.00612624	0.839666	0.107403	0.332724	ME5.18,ME7.18,ME8.2,ME9.5	SNP23_HUMAN	reviewed	Synaptosomal-associated protein 23 (SNAP-23) (Vesicle-membrane fusion protein SNAP-23)	SNAP23	Homo sapiens (Human)	211
HPV-31_E5	P22061	PIMT	0.00297433	0.850773	0.102273	0.332616	ME6.18,ME7.17,ME8.6,ME9.6	PIMT_HUMAN	reviewed	Protein-L-isoaspartate(D-aspartate) O-methyltransferase (PIMT) (EC 2.1.1.77) (L-isoaspartyl protein carboxyl methyltransferase) (Protein L-isoaspartyl/D-aspartyl methyltransferase) (Protein-beta-aspartate methyltransferase)	PCMT1	Homo sapiens (Human)	227
HPV-31_E7	P47914	RL29	0.0032348	0.887205	0.0857146	0.332507	ME5.19,ME6.23,ME7.19,ME8.8,ME9.8	RL29_HUMAN	reviewed	60S ribosomal protein L29 (Cell surface heparin-binding protein HIP)	RPL29	Homo sapiens (Human)	159
HPV-31_E2	P46776	RL27A	0.00352523	0.824359	0.113995	0.332506	ME5.20,ME6.19,ME7.21,ME9.9	RL27A_HUMAN	reviewed	60S ribosomal protein L27a	RPL27A	Homo sapiens (Human)	148
HPV-31_L2	Q3MHD2	LSM12	0.00863652	0.922931	0.0694637	0.332422	ME5.22,ME6.21,ME7.20,ME8.7,ME9.7	LSM12_HUMAN	reviewed	Protein LSM12 homolog	LSM12	Homo sapiens (Human)	195
HPV-31_E7	P22626	ROA2	0.00490908	0.954679	0.055097	0.332346	ME5.19,ME6.23,ME7.19,ME8.8,ME9.8	ROA2_HUMAN	reviewed	Heterogeneous nuclear ribonucleoproteins A2/B1 (hnRNP A2/B1)	HNRNPA2B1 HNRPA2B1	Homo sapiens (Human)	353
HPV-31_E7	P11021	GRP78	0.00944348	0.808229	0.120455	0.331992	ME5.19,ME6.23,ME7.19,ME8.8,ME9.8	GRP78_HUMAN	reviewed	78 kDa glucose-regulated protein (GRP-78) (Endoplasmic reticulum lumenal Ca(2+)-binding protein grp78) (Heat shock 70 kDa protein 5) (Immunoglobulin heavy chain-binding protein) (BiP)	HSPA5 GRP78	Homo sapiens (Human)	654
HPV-31_E6	P17066	HSP76	0.00422504	0.931639	0.0645705	0.331727	ME5.18,ME6.17,ME7.18,ME8.2,ME9.5	HSP76_HUMAN	reviewed	Heat shock 70 kDa protein 6 (Heat shock 70 kDa protein B')	HSPA6 HSP70B'	Homo sapiens (Human)	643
HPV-31_E7	P18124	RL7	0.00434688	0.874059	0.0901562	0.331502	ME5.19,ME6.23,ME7.19,ME8.8,ME9.8	RL7_HUMAN	reviewed	60S ribosomal protein L7	RPL7	Homo sapiens (Human)	248
HPV-31_E1^E4	C9JLW8	F195B	0.0206774	0.914667	0.07173	0.331497	ME5.17,ME6.16,ME7.16,ME8.5,ME9.3	F195B_HUMAN	reviewed	Protein FAM195B	FAM195B	Homo sapiens (Human)	97
HPV-31_E6	Q96EP5	DAZP1	0.00536721	0.804235	0.121427	0.331402	ME5.18,ME7.18,ME8.2,ME9.5	DAZP1_HUMAN	reviewed	DAZ-associated protein 1 (Deleted in azoospermia-associated protein 1)	DAZAP1	Homo sapiens (Human)	407
HPV-31_E1^E4	Q12906	ILF3	0.00144268	0.853298	0.0990735	0.331192	ME5.17,ME6.16,ME7.16,ME8.5,ME9.3	ILF3_HUMAN	reviewed	Interleukin enhancer-binding factor 3 (Double-stranded RNA-binding protein 76) (DRBP76) (M-phase phosphoprotein 4) (MPP4) (Nuclear factor associated with dsRNA) (NFAR) (Nuclear factor of activated T-cells 90 kDa) (NF-AT-90) (Translational control protein 80) (TCP80)	ILF3 DRBF MPHOSPH4 NF90	Homo sapiens (Human)	894
HPV-31_E7	P23246	SFPQ	0.00112091	0.845221	0.102225	0.330859	ME6.23,ME7.19,ME8.8,ME9.8	SFPQ_HUMAN	reviewed	Splicing factor, proline- and glutamine-rich (100 kDa DNA-pairing protein) (hPOMp100) (DNA-binding p52/p100 complex, 100 kDa subunit) (Polypyrimidine tract-binding protein-associated-splicing factor) (PSF) (PTB-associated-splicing factor)	SFPQ PSF	Homo sapiens (Human)	707
HPV-31_E5	P39019	RS19	0.00481024	0.670062	0.180956	0.33081	ME7.17,ME8.6,ME9.6	RS19_HUMAN	reviewed	40S ribosomal protein S19	RPS19	Homo sapiens (Human)	145
HPV-31_E1^E4	Q5T653	RM02	0.000244219	6.21335e-11	0.482474	0.330742	ME7.16	RM02_HUMAN	reviewed	39S ribosomal protein L2, mitochondrial (L2mt) (MRP-L2)	MRPL2 CGI-22	Homo sapiens (Human)	305
HPV-31_E7	P68371	TBB4B	0.0137793	0.84842	0.100414	0.33068	ME6.23,ME7.19,ME8.8,ME9.8	TBB4B_HUMAN	reviewed	Tubulin beta-4B chain (Tubulin beta-2 chain) (Tubulin beta-2C chain)	TUBB4B TUBB2C	Homo sapiens (Human)	445
HPV-31_E8^E2C	P61353	RL27	0.00460603	0.757663	0.141179	0.330569	ME5.15,ME6.15,ME7.15,ME9.2	RL27_HUMAN	reviewed	60S ribosomal protein L27	RPL27	Homo sapiens (Human)	136
HPV-31_L1	P15880	RS2	0.00647109	0.851257	0.0989333	0.330497	ME6.20,ME7.22,ME8.10,ME9.12	RS2_HUMAN	reviewed	40S ribosomal protein S2 (40S ribosomal protein S4) (Protein LLRep3)	RPS2 RPS4	Homo sapiens (Human)	293
HPV-31_L2	P50914	RL14	0.00357311	0.90491	0.0745999	0.330352	ME5.22,ME6.21,ME7.20,ME8.7,ME9.7	RL14_HUMAN	reviewed	60S ribosomal protein L14 (CAG-ISL 7)	RPL14	Homo sapiens (Human)	215
HPV-31_L2	Q9UN86	G3BP2	0.00341554	0.911409	0.0710772	0.329941	ME5.22,ME6.21,ME7.20,ME8.7,ME9.7	G3BP2_HUMAN	reviewed	Ras GTPase-activating protein-binding protein 2 (G3BP-2) (GAP SH3 domain-binding protein 2)	G3BP2 KIAA0660	Homo sapiens (Human)	482
HPV-31_L1	P62851	RS25	0.00236655	0.615174	0.204335	0.329888	ME6.20,ME7.22,ME8.10	RS25_HUMAN	reviewed	40S ribosomal protein S25	RPS25	Homo sapiens (Human)	125
HPV-31_E8^E2C	Q9HC36	RMTL1	0.000304008	0.42128	0.291565	0.32985	ME7.15,ME9.2	RMTL1_HUMAN	reviewed	RNA methyltransferase-like protein 1 (EC 2.1.1.-)	RNMTL1 HC90	Homo sapiens (Human)	420
HPV-31_E7	P62857	RS28	0.0133344	0.871145	0.0889098	0.329802	ME5.19,ME6.23,ME7.19,ME8.8,ME9.8	RS28_HUMAN	reviewed	40S ribosomal protein S28	RPS28	Homo sapiens (Human)	69
HPV-31_E5	P22626	ROA2	0.0101852	0.81474	0.114313	0.329795	ME5.14,ME7.17,ME8.6,ME9.6	ROA2_HUMAN	reviewed	Heterogeneous nuclear ribonucleoproteins A2/B1 (hnRNP A2/B1)	HNRNPA2B1 HNRPA2B1	Homo sapiens (Human)	353
HPV-31_E7	P62241	RS8	0.0118562	0.858172	0.0946273	0.32971	ME5.19,ME6.23,ME7.19,ME8.8,ME9.8	RS8_HUMAN	reviewed	40S ribosomal protein S8	RPS8 OK/SW-cl.83	Homo sapiens (Human)	208
HPV-31_E6	P62829	RL23	0.0063832	0.943536	0.0561898	0.329666	ME5.18,ME6.17,ME7.18,ME8.2,ME9.5	RL23_HUMAN	reviewed	60S ribosomal protein L23 (60S ribosomal protein L17)	RPL23	Homo sapiens (Human)	140
HPV-31_L1	Q8WWM7	ATX2L	0.00822274	0.912802	0.0698427	0.329554	ME5.23,ME6.20,ME7.22,ME8.10,ME9.12	ATX2L_HUMAN	reviewed	Ataxin-2-like protein (Ataxin-2 domain protein) (Ataxin-2-related protein)	ATXN2L A2D A2LG A2LP A2RP	Homo sapiens (Human)	1075
HPV-31_L2	P84090	ERH	0.00286155	0.94414	0.0555734	0.329409	ME5.22,ME6.21,ME7.20,ME8.7,ME9.7	ERH_HUMAN	reviewed	Enhancer of rudimentary homolog	ERH	Homo sapiens (Human)	104
HPV-31_E5	Q9H7E9	CH033	0.000327999	6.21335e-11	0.480496	0.329387	ME9.6	CH033_HUMAN	reviewed	UPF0488 protein C8orf33	C8orf33	Homo sapiens (Human)	229
HPV-31_L1	Q07955	SRSF1	0.0014245	0.671738	0.178116	0.32936	ME7.22,ME8.10,ME9.12	SRSF1_HUMAN	reviewed	Serine/arginine-rich splicing factor 1 (Alternative-splicing factor 1) (ASF-1) (Splicing factor, arginine/serine-rich 1) (pre-mRNA-splicing factor SF2, P33 subunit)	SRSF1 ASF SF2 SF2P33 SFRS1 OK/SW-cl.3	Homo sapiens (Human)	248
HPV-31_L1	P36578	RL4	0.00761432	0.848373	0.0984575	0.329288	ME6.20,ME7.22,ME8.10,ME9.12	RL4_HUMAN	reviewed	60S ribosomal protein L4 (60S ribosomal protein L1)	RPL4 RPL1	Homo sapiens (Human)	427
HPV-31_E7	P36578	RL4	0.00784104	0.841353	0.101389	0.329133	ME5.19,ME6.23,ME7.19,ME8.8,ME9.8	RL4_HUMAN	reviewed	60S ribosomal protein L4 (60S ribosomal protein L1)	RPL4 RPL1	Homo sapiens (Human)	427
HPV-31_E7	Q99439	CNN2	0.000206065	6.21335e-11	0.479937	0.329003	ME7.19	CNN2_HUMAN	reviewed	Calponin-2 (Calponin H2, smooth muscle) (Neutral calponin)	CNN2	Homo sapiens (Human)	309
HPV-31_E5	P62829	RL23	0.00687495	0.93138	0.0605186	0.328886	ME5.14,ME6.18,ME7.17,ME8.6,ME9.6	RL23_HUMAN	reviewed	60S ribosomal protein L23 (60S ribosomal protein L17)	RPL23	Homo sapiens (Human)	140
HPV-31_L2	P62899	RL31	0.00512265	0.930951	0.0607086	0.328873	ME5.22,ME6.21,ME7.20,ME8.7,ME9.7	RL31_HUMAN	reviewed	60S ribosomal protein L31	RPL31	Homo sapiens (Human)	125
HPV-31_E7	P52597	HNRPF	0.00205451	0.840512	0.101311	0.328785	ME6.23,ME7.19,ME8.8,ME9.8	HNRPF_HUMAN	reviewed	Heterogeneous nuclear ribonucleoprotein F (hnRNP F) (Nucleolin-like protein mcs94-1) [Cleaved into: Heterogeneous nuclear ribonucleoprotein F, N-terminally processed]	HNRNPF HNRPF	Homo sapiens (Human)	415
HPV-31_L2	P62847	RS24	0.00558995	0.839291	0.101755	0.328734	ME6.21,ME7.20,ME8.7,ME9.7	RS24_HUMAN	reviewed	40S ribosomal protein S24	RPS24	Homo sapiens (Human)	133
HPV-31_E1^E4	P26599	PTBP1	0.00161372	0.619176	0.200747	0.328658	ME7.16,ME8.5,ME9.3	PTBP1_HUMAN	reviewed	Polypyrimidine tract-binding protein 1 (PTB) (57 kDa RNA-binding protein PPTB-1) (Heterogeneous nuclear ribonucleoprotein I) (hnRNP I)	PTBP1 PTB	Homo sapiens (Human)	531
HPV-31_E1	Q96S59	RANB9	9.46875e-05	6.21335e-11	0.479303	0.328567	ME7.23	RANB9_HUMAN	reviewed	Ran-binding protein 9 (RanBP9) (BPM-L) (BPM90) (Ran-binding protein M) (RanBPM) (RanBP7)	RANBP9 RANBPM	Homo sapiens (Human)	729
HPV-31_L1	P46783	RS10	0.00121682	0.429537	0.285913	0.328529	ME7.22,ME8.10	RS10_HUMAN	reviewed	40S ribosomal protein S10	RPS10	Homo sapiens (Human)	165
HPV-31_E5	P68371	TBB4B	0.0138264	0.83944	0.100758	0.328146	ME6.18,ME7.17,ME8.6,ME9.6	TBB4B_HUMAN	reviewed	Tubulin beta-4B chain (Tubulin beta-2 chain) (Tubulin beta-2C chain)	TUBB4B TUBB2C	Homo sapiens (Human)	445
HPV-31_E1^E4	P60709	ACTB	0.00523752	0.812535	0.112659	0.327951	ME5.17,ME6.16,ME7.16,ME8.5	ACTB_HUMAN	reviewed	Actin, cytoplasmic 1 (Beta-actin) [Cleaved into: Actin, cytoplasmic 1, N-terminally processed]	ACTB	Homo sapiens (Human)	375
HPV-31_E7	P67809	YBOX1	0.0127007	0.793652	0.12061	0.32762	ME5.19,ME6.23,ME7.19,ME8.8,ME9.8	YBOX1_HUMAN	reviewed	Nuclease-sensitive element-binding protein 1 (CCAAT-binding transcription factor I subunit A) (CBF-A) (DNA-binding protein B) (DBPB) (Enhancer factor I subunit A) (EFI-A) (Y-box transcription factor) (Y-box-binding protein 1) (YB-1)	YBX1 NSEP1 YB1	Homo sapiens (Human)	324
HPV-31_E5	P67809	YBOX1	0.00792538	0.894049	0.0752618	0.327481	ME5.14,ME6.18,ME7.17,ME8.6,ME9.6	YBOX1_HUMAN	reviewed	Nuclease-sensitive element-binding protein 1 (CCAAT-binding transcription factor I subunit A) (CBF-A) (DNA-binding protein B) (DBPB) (Enhancer factor I subunit A) (EFI-A) (Y-box transcription factor) (Y-box-binding protein 1) (YB-1)	YBX1 NSEP1 YB1	Homo sapiens (Human)	324
HPV-31_L1	Q92900	RENT1	0.000743946	0.600061	0.207535	0.327408	ME6.20,ME7.22,ME9.12	RENT1_HUMAN	reviewed	Regulator of nonsense transcripts 1 (EC 3.6.4.-) (ATP-dependent helicase RENT1) (Nonsense mRNA reducing factor 1) (NORF1) (Up-frameshift suppressor 1 homolog) (hUpf1)	UPF1 KIAA0221 RENT1	Homo sapiens (Human)	1129
HPV-31_E6	P23396	RS3	0.00441822	0.908343	0.0682542	0.327066	ME5.18,ME6.17,ME7.18,ME8.2,ME9.5	RS3_HUMAN	reviewed	40S ribosomal protein S3	RPS3 OK/SW-cl.26	Homo sapiens (Human)	243
HPV-31_L1	Q6P158	DHX57	7.11448e-05	6.21335e-11	0.477109	0.327064	ME9.12	DHX57_HUMAN	reviewed	Putative ATP-dependent RNA helicase DHX57 (EC 3.6.4.13) (DEAH box protein 57)	DHX57	Homo sapiens (Human)	1386
HPV-31_E6	P55884	EIF3B	0.00120474	0.806905	0.113927	0.327059	ME5.18,ME7.18,ME8.2,ME9.5	EIF3B_HUMAN	reviewed	Eukaryotic translation initiation factor 3 subunit B (eIF3b) (Eukaryotic translation initiation factor 3 subunit 9) (Prt1 homolog) (hPrt1) (eIF-3-eta) (eIF3 p110) (eIF3 p116)	EIF3B EIF3S9	Homo sapiens (Human)	814
HPV-31_E7	P27635	RL10	0.00405975	0.856032	0.0917537	0.327034	ME6.23,ME7.19,ME8.8,ME9.8	RL10_HUMAN	reviewed	60S ribosomal protein L10 (Laminin receptor homolog) (Protein QM) (Tumor suppressor QM)	RPL10 DXS648E QM	Homo sapiens (Human)	214
HPV-31_E8^E2C	P27635	RL10	0.00425486	0.811854	0.111466	0.326918	ME6.15,ME7.15,ME8.4,ME9.2	RL10_HUMAN	reviewed	60S ribosomal protein L10 (Laminin receptor homolog) (Protein QM) (Tumor suppressor QM)	RPL10 DXS648E QM	Homo sapiens (Human)	214
HPV-31_L2	Q9BUT9	F195A	0.00192285	0.840847	0.0982428	0.326784	ME5.22,ME7.20,ME8.7,ME9.7	F195A_HUMAN	reviewed	Protein FAM195A	FAM195A C16orf14	Homo sapiens (Human)	160
HPV-31_E1	P62906	RL10A	0.00385685	0.763162	0.132874	0.326568	ME5.21,ME7.23,ME8.11,ME9.10	RL10A_HUMAN	reviewed	60S ribosomal protein L10a (CSA-19) (Neural precursor cell expressed developmentally down-regulated protein 6) (NEDD-6)	RPL10A NEDD6	Homo sapiens (Human)	217
HPV-31_E7	Q9BQE3	TBA1C	0.00852906	0.839139	0.0982649	0.326312	ME6.23,ME7.19,ME8.8,ME9.8	TBA1C_HUMAN	reviewed	Tubulin alpha-1C chain (Alpha-tubulin 6) (Tubulin alpha-6 chain)	TUBA1C TUBA6	Homo sapiens (Human)	449
HPV-31_L1	P62266	RS23	0.00449598	0.828391	0.102908	0.326154	ME6.20,ME7.22,ME8.10,ME9.12	RS23_HUMAN	reviewed	40S ribosomal protein S23	RPS23	Homo sapiens (Human)	143
HPV-31_E2	P08107	HSP71	0.0125873	0.884063	0.0776822	0.326087	ME5.20,ME6.19,ME7.21,ME8.9,ME9.9	HSP71_HUMAN	reviewed	Heat shock 70 kDa protein 1A/1B (Heat shock 70 kDa protein 1/2) (HSP70-1/HSP70-2) (HSP70.1/HSP70.2)	HSPA1A HSPA1; HSPA1B	Homo sapiens (Human)	641
HPV-31_E8^E2C	Q99613	EIF3C	0.000671947	0.644545	0.185307	0.325896	ME7.15,ME8.4,ME9.2	EIF3C_HUMAN	reviewed	Eukaryotic translation initiation factor 3 subunit C (eIF3c) (Eukaryotic translation initiation factor 3 subunit 8) (eIF3 p110)	EIF3C EIF3S8; EIF3CL	Homo sapiens (Human)	913
HPV-31_L1	P18621	RL17	0.00298982	0.673848	0.171864	0.325734	ME6.20,ME7.22,ME9.12	RL17_HUMAN	reviewed	60S ribosomal protein L17 (60S ribosomal protein L23) (PD-1)	RPL17	Homo sapiens (Human)	184
HPV-31_E2	P23588	IF4B	0.000458378	0.532066	0.235678	0.325721	ME7.21,ME8.9,ME9.9	IF4B_HUMAN	reviewed	Eukaryotic translation initiation factor 4B (eIF-4B)	EIF4B	Homo sapiens (Human)	611
HPV-31_E8^E2C	P07737	PROF1	0.00134503	6.21335e-11	0.475015	0.325635	ME6.15	PROF1_HUMAN	reviewed	Profilin-1 (Epididymis tissue protein Li 184a) (Profilin I)	PFN1	Homo sapiens (Human)	140
HPV-31_E1^E4	P62847	RS24	0.00464535	0.846361	0.0938764	0.325509	ME5.17,ME7.16,ME8.5,ME9.3	RS24_HUMAN	reviewed	40S ribosomal protein S24	RPS24	Homo sapiens (Human)	133
HPV-31_E2	P27635	RL10	0.00607452	0.717398	0.151896	0.325501	ME6.19,ME7.21,ME8.9,ME9.9	RL10_HUMAN	reviewed	60S ribosomal protein L10 (Laminin receptor homolog) (Protein QM) (Tumor suppressor QM)	RPL10 DXS648E QM	Homo sapiens (Human)	214
HPV-31_L1	P61513	RL37A	0.00124148	0.425517	0.28316	0.325401	ME7.22,ME9.12	RL37A_HUMAN	reviewed	60S ribosomal protein L37a	RPL37A	Homo sapiens (Human)	92
HPV-31_E6	P19338	NUCL	0.00613841	0.900862	0.0691282	0.325368	ME5.18,ME6.17,ME7.18,ME8.2,ME9.5	NUCL_HUMAN	reviewed	Nucleolin (Protein C23)	NCL	Homo sapiens (Human)	710
HPV-31_E5	P68363	TBA1B	0.0115875	0.87656	0.0797722	0.325199	ME5.14,ME6.18,ME7.17,ME8.6,ME9.6	TBA1B_HUMAN	reviewed	Tubulin alpha-1B chain (Alpha-tubulin ubiquitous) (Tubulin K-alpha-1) (Tubulin alpha-ubiquitous chain)	TUBA1B	Homo sapiens (Human)	451
HPV-31_E6	P24534	EF1B	0.000618738	0.429205	0.281152	0.325159	ME5.18,ME9.5	EF1B_HUMAN	reviewed	Elongation factor 1-beta (EF-1-beta)	EEF1B2 EEF1B EF1B	Homo sapiens (Human)	225
HPV-31_L1	P46779	RL28	0.00679592	0.838034	0.0962746	0.324596	ME6.20,ME7.22,ME8.10,ME9.12	RL28_HUMAN	reviewed	60S ribosomal protein L28	RPL28	Homo sapiens (Human)	137
HPV-31_E8^E2C	Q12906	ILF3	0.00160164	0.794545	0.115573	0.324377	ME5.15,ME7.15,ME8.4,ME9.2	ILF3_HUMAN	reviewed	Interleukin enhancer-binding factor 3 (Double-stranded RNA-binding protein 76) (DRBP76) (M-phase phosphoprotein 4) (MPP4) (Nuclear factor associated with dsRNA) (NFAR) (Nuclear factor of activated T-cells 90 kDa) (NF-AT-90) (Translational control protein 80) (TCP80)	ILF3 DRBF MPHOSPH4 NF90	Homo sapiens (Human)	894
HPV-31_E8^E2C	P60709	ACTB	0.00387368	0.85769	0.0867817	0.324136	ME5.15,ME6.15,ME7.15,ME9.2	ACTB_HUMAN	reviewed	Actin, cytoplasmic 1 (Beta-actin) [Cleaved into: Actin, cytoplasmic 1, N-terminally processed]	ACTB	Homo sapiens (Human)	375
HPV-31_E8^E2C	P46777	RL5	0.00221205	0.834174	0.0973277	0.3241	ME6.15,ME7.15,ME8.4,ME9.2	RL5_HUMAN	reviewed	60S ribosomal protein L5	RPL5 MSTP030	Homo sapiens (Human)	297
HPV-31_L2	P46776	RL27A	0.00321104	0.850415	0.0898704	0.324005	ME5.22,ME6.21,ME7.20,ME9.7	RL27A_HUMAN	reviewed	60S ribosomal protein L27a	RPL27A	Homo sapiens (Human)	148
HPV-31_L2	P08238	HS90B	0.00129684	0.841936	0.0936525	0.32397	ME5.22,ME6.21,ME7.20,ME9.7	HS90B_HUMAN	reviewed	Heat shock protein HSP 90-beta (HSP 90) (Heat shock 84 kDa) (HSP 84) (HSP84)	HSP90AB1 HSP90B HSPC2 HSPCB	Homo sapiens (Human)	724
HPV-31_E7	Q9H4B7	TBB1	0.00164682	0.635751	0.186294	0.323864	ME6.23,ME7.19,ME8.8	TBB1_HUMAN	reviewed	Tubulin beta-1 chain	TUBB1	Homo sapiens (Human)	451
HPV-31_E1^E4	O00571	DDX3X	0.00113641	0.811863	0.106782	0.323691	ME6.16,ME7.16,ME8.5,ME9.3	DDX3X_HUMAN	reviewed	ATP-dependent RNA helicase DDX3X (EC 3.6.4.13) (DEAD box protein 3, X-chromosomal) (DEAD box, X isoform) (Helicase-like protein 2) (HLP2)	DDX3X DBX DDX3	Homo sapiens (Human)	662
HPV-31_E1^E4	Q9NVC3	S38A7	0.00057795	0.830458	0.0984046	0.323682	ME6.16,ME7.16,ME8.5,ME9.3	S38A7_HUMAN	reviewed	Putative sodium-coupled neutral amino acid transporter 7	SLC38A7 SNAT7	Homo sapiens (Human)	462
HPV-31_E6	P0CG47	UBB	0.00685675	0.678652	0.166549	0.323597	ME5.18,ME6.17,ME8.2	UBB_HUMAN	reviewed	Polyubiquitin-B [Cleaved into: Ubiquitin]	UBB	Homo sapiens (Human)	229
HPV-31_E1	Q13310	PABP4	0.00448926	0.851211	0.0885418	0.323347	ME6.22,ME7.23,ME8.11,ME9.10	PABP4_HUMAN	reviewed	Polyadenylate-binding protein 4 (PABP-4) (Poly(A)-binding protein 4) (Activated-platelet protein 1) (APP-1) (Inducible poly(A)-binding protein) (iPABP)	PABPC4 APP1 PABP4	Homo sapiens (Human)	644
HPV-31_E1^E4	Q92598	HS105	0.000983061	0.587499	0.207257	0.323343	ME5.17,ME7.16,ME8.5	HS105_HUMAN	reviewed	Heat shock protein 105 kDa (Antigen NY-CO-25) (Heat shock 110 kDa protein)	HSPH1 HSP105 HSP110 KIAA0201	Homo sapiens (Human)	858
HPV-31_L2	P27635	RL10	0.00436025	0.828516	0.0985452	0.323202	ME6.21,ME7.20,ME8.7,ME9.7	RL10_HUMAN	reviewed	60S ribosomal protein L10 (Laminin receptor homolog) (Protein QM) (Tumor suppressor QM)	RPL10 DXS648E QM	Homo sapiens (Human)	214
HPV-31_E8^E2C	P60228	EIF3E	0.000711772	0.657595	0.175358	0.323102	ME5.15,ME7.15,ME9.2	EIF3E_HUMAN	reviewed	Eukaryotic translation initiation factor 3 subunit E (eIF3e) (Eukaryotic translation initiation factor 3 subunit 6) (Viral integration site protein INT-6 homolog) (eIF-3 p48)	EIF3E EIF3S6 INT6	Homo sapiens (Human)	445
HPV-31_L2	P11498	PYC	0.00766022	0.918122	0.0580389	0.3231	ME5.22,ME6.21,ME7.20,ME8.7,ME9.7	PYC_HUMAN	reviewed	Pyruvate carboxylase, mitochondrial (EC 6.4.1.1) (Pyruvic carboxylase) (PCB)	PC	Homo sapiens (Human)	1178
HPV-31_E1	Q9UN86	G3BP2	0.00428934	0.826444	0.0990689	0.322921	ME6.22,ME7.23,ME8.11,ME9.10	G3BP2_HUMAN	reviewed	Ras GTPase-activating protein-binding protein 2 (G3BP-2) (GAP SH3 domain-binding protein 2)	G3BP2 KIAA0660	Homo sapiens (Human)	482
HPV-31_E8^E2C	P31943	HNRH1	0.00229436	0.85104	0.0877644	0.322748	ME5.15,ME6.15,ME7.15,ME9.2	HNRH1_HUMAN	reviewed	Heterogeneous nuclear ribonucleoprotein H (hnRNP H) [Cleaved into: Heterogeneous nuclear ribonucleoprotein H, N-terminally processed]	HNRNPH1 HNRPH HNRPH1	Homo sapiens (Human)	449
HPV-31_L2	Q92522	H1X	0.00129523	0.664277	0.171259	0.322357	ME6.21,ME7.20,ME9.7	H1X_HUMAN	reviewed	Histone H1x	H1FX	Homo sapiens (Human)	213
HPV-31_E7	P43243	MATR3	0.00144458	0.681774	0.163244	0.322262	ME6.23,ME7.19,ME8.8	MATR3_HUMAN	reviewed	Matrin-3	MATR3 KIAA0723	Homo sapiens (Human)	847
HPV-31_E1^E4	P46777	RL5	0.00168456	0.874976	0.0761688	0.322181	ME5.17,ME6.16,ME7.16,ME8.5,ME9.3	RL5_HUMAN	reviewed	60S ribosomal protein L5	RPL5 MSTP030	Homo sapiens (Human)	297
HPV-31_L1	P50914	RL14	0.00396013	0.860199	0.0826803	0.322099	ME6.20,ME7.22,ME8.10,ME9.12	RL14_HUMAN	reviewed	60S ribosomal protein L14 (CAG-ISL 7)	RPL14	Homo sapiens (Human)	215
HPV-31_E7	P62899	RL31	0.00927418	0.799475	0.109908	0.322061	ME5.19,ME6.23,ME7.19,ME8.8,ME9.8	RL31_HUMAN	reviewed	60S ribosomal protein L31	RPL31	Homo sapiens (Human)	125
HPV-31_L2	P09651	ROA1	0.00303543	0.931812	0.0503579	0.322031	ME5.22,ME6.21,ME7.20,ME8.7,ME9.7	ROA1_HUMAN	reviewed	Heterogeneous nuclear ribonucleoprotein A1 (hnRNP A1) (Helix-destabilizing protein) (Single-strand RNA-binding protein) (hnRNP core protein A1)	HNRNPA1 HNRPA1	Homo sapiens (Human)	372
HPV-31_E2	P62917	RL8	0.00345807	0.826713	0.097351	0.321821	ME5.20,ME7.21,ME8.9,ME9.9	RL8_HUMAN	reviewed	60S ribosomal protein L8	RPL8	Homo sapiens (Human)	257
HPV-31_E1^E4	Q9NYK5	RM39	0.000373606	0.425821	0.277681	0.321734	ME7.16,ME9.3	RM39_HUMAN	reviewed	39S ribosomal protein L39, mitochondrial (L39mt) (MRP-L39) (39S ribosomal protein L5, mitochondrial) (L5mt) (MRP-L5)	MRPL39 C21orf92 MRPL5 RPML5 MSTP003 PRED22	Homo sapiens (Human)	338
HPV-31_E1^E4	Q3ZCM7	TBB8	0.00567103	0.662496	0.170175	0.321091	ME5.17,ME6.16,ME8.5	TBB8_HUMAN	reviewed	Tubulin beta-8 chain	TUBB8	Homo sapiens (Human)	444
HPV-31_L2	C9JLW8	F195B	0.01633	0.923357	0.0524757	0.320953	ME5.22,ME6.21,ME7.20,ME8.7,ME9.7	F195B_HUMAN	reviewed	Protein FAM195B	FAM195B	Homo sapiens (Human)	97
HPV-31_E2	P05455	LA	0.000766142	0.639165	0.180317	0.320815	ME5.20,ME7.21,ME9.9	LA_HUMAN	reviewed	Lupus La protein (La autoantigen) (La ribonucleoprotein) (Sjoegren syndrome type B antigen) (SS-B)	SSB	Homo sapiens (Human)	408
HPV-31_L2	Q02543	RL18A	0.00271808	0.795441	0.10995	0.320806	ME5.22,ME6.21,ME7.20,ME9.7	RL18A_HUMAN	reviewed	60S ribosomal protein L18a	RPL18A	Homo sapiens (Human)	176
HPV-31_E1^E4	Q13310	PABP4	0.00480378	0.829966	0.0941608	0.320646	ME6.16,ME7.16,ME8.5,ME9.3	PABP4_HUMAN	reviewed	Polyadenylate-binding protein 4 (PABP-4) (Poly(A)-binding protein 4) (Activated-platelet protein 1) (APP-1) (Inducible poly(A)-binding protein) (iPABP)	PABPC4 APP1 PABP4	Homo sapiens (Human)	644
HPV-31_E7	P06748	NPM	0.00327849	0.704554	0.150513	0.320574	ME5.19,ME6.23,ME7.19,ME9.8	NPM_HUMAN	reviewed	Nucleophosmin (NPM) (Nucleolar phosphoprotein B23) (Nucleolar protein NO38) (Numatrin)	NPM1 NPM	Homo sapiens (Human)	294
HPV-31_E1^E4	P62701	RS4X	0.00376797	0.893192	0.0653149	0.320373	ME5.17,ME6.16,ME7.16,ME8.5,ME9.3	RS4X_HUMAN	reviewed	40S ribosomal protein S4, X isoform (SCR10) (Single copy abundant mRNA protein)	RPS4X CCG2 RPS4 SCAR	Homo sapiens (Human)	263
HPV-31_E7	P62158	CALM	0.00656624	0.722163	0.142173	0.320309	ME5.19,ME6.23,ME7.19,ME8.8	CALM_HUMAN	reviewed	Calmodulin (CaM)	CALM1 CALM CAM CAM1; CALM2 CAM2 CAMB; CALM3 CALML2 CAM3 CAMC CAMIII	Homo sapiens (Human)	149
HPV-31_E6	P62979	RS27A	0.00540592	0.391601	0.290958	0.320307	ME7.18,ME9.5	RS27A_HUMAN	reviewed	Ubiquitin-40S ribosomal protein S27a (Ubiquitin carboxyl extension protein 80) [Cleaved into: Ubiquitin; 40S ribosomal protein S27a]	RPS27A UBA80 UBCEP1	Homo sapiens (Human)	156
HPV-31_E6	Q00839	HNRPU	0.00222016	0.902832	0.0607606	0.320216	ME5.18,ME6.17,ME7.18,ME8.2,ME9.5	HNRPU_HUMAN	reviewed	Heterogeneous nuclear ribonucleoprotein U (hnRNP U) (Scaffold attachment factor A) (SAF-A) (p120) (pp120)	HNRNPU HNRPU SAFA U21.1	Homo sapiens (Human)	825
HPV-31_E5	P37108	SRP14	0.00195678	0.670841	0.164643	0.319851	ME7.17,ME8.6,ME9.6	SRP14_HUMAN	reviewed	Signal recognition particle 14 kDa protein (SRP14) (18 kDa Alu RNA-binding protein)	SRP14	Homo sapiens (Human)	136
HPV-31_E2	P17844	DDX5	0.00152604	0.818254	0.0981541	0.319751	ME5.20,ME6.19,ME7.21,ME9.9	DDX5_HUMAN	reviewed	Probable ATP-dependent RNA helicase DDX5 (EC 3.6.4.13) (DEAD box protein 5) (RNA helicase p68)	DDX5 G17P1 HELR HLR1	Homo sapiens (Human)	614
HPV-31_E2	P62158	CALM	0.00494771	0.781329	0.114599	0.319652	ME5.20,ME6.19,ME7.21,ME8.9	CALM_HUMAN	reviewed	Calmodulin (CaM)	CALM1 CALM CAM CAM1; CALM2 CAM2 CAMB; CALM3 CALML2 CAM3 CAMC CAMIII	Homo sapiens (Human)	149
HPV-31_E1	P62701	RS4X	0.00507157	0.84475	0.0859693	0.319594	ME6.22,ME7.23,ME8.11,ME9.10	RS4X_HUMAN	reviewed	40S ribosomal protein S4, X isoform (SCR10) (Single copy abundant mRNA protein)	RPS4X CCG2 RPS4 SCAR	Homo sapiens (Human)	263
HPV-31_L1	P38646	GRP75	0.0085134	0.830903	0.0919713	0.319456	ME5.23,ME6.20,ME7.22,ME8.10,ME9.12	GRP75_HUMAN	reviewed	Stress-70 protein, mitochondrial (75 kDa glucose-regulated protein) (GRP-75) (Heat shock 70 kDa protein 9) (Mortalin) (MOT) (Peptide-binding protein 74) (PBP74)	HSPA9 GRP75 HSPA9B	Homo sapiens (Human)	679
HPV-31_E8^E2C	Q96C55	ZN524	0.000206332	6.21335e-11	0.465715	0.319254	ME9.2	ZN524_HUMAN	reviewed	Zinc finger protein 524	ZNF524	Homo sapiens (Human)	264
HPV-31_E8^E2C	Q9BQA1	MEP50	0.000743587	6.21335e-11	0.465374	0.319023	ME8.4	MEP50_HUMAN	reviewed	Methylosome protein 50 (MEP-50) (Androgen receptor cofactor p44) (WD repeat-containing protein 77) (p44/Mep50)	WDR77 MEP50 HKMT1069 Nbla10071	Homo sapiens (Human)	342
HPV-31_E6	P62854	RS26	0.00427834	0.856851	0.0796802	0.319011	ME5.18,ME6.17,ME7.18,ME9.5	RS26_HUMAN	reviewed	40S ribosomal protein S26	RPS26	Homo sapiens (Human)	115
HPV-31_L2	P22061	PIMT	0.00176951	0.898579	0.0608449	0.318959	ME5.22,ME6.21,ME7.20,ME8.7,ME9.7	PIMT_HUMAN	reviewed	Protein-L-isoaspartate(D-aspartate) O-methyltransferase (PIMT) (EC 2.1.1.77) (L-isoaspartyl protein carboxyl methyltransferase) (Protein L-isoaspartyl/D-aspartyl methyltransferase) (Protein-beta-aspartate methyltransferase)	PCMT1	Homo sapiens (Human)	227
HPV-31_E1	P25398	RS12	0.00453704	0.831817	0.0904768	0.31869	ME5.21,ME7.23,ME8.11,ME9.10	RS12_HUMAN	reviewed	40S ribosomal protein S12	RPS12	Homo sapiens (Human)	132
HPV-31_E7	C9JLW8	F195B	0.0306003	0.81359	0.0983323	0.318607	ME5.19,ME6.23,ME7.19,ME8.8,ME9.8	F195B_HUMAN	reviewed	Protein FAM195B	FAM195B	Homo sapiens (Human)	97
HPV-31_E1^E4	Q86V81	THOC4	0.00154571	0.779026	0.113997	0.318509	ME6.16,ME7.16,ME8.5,ME9.3	THOC4_HUMAN	reviewed	THO complex subunit 4 (Tho4) (Ally of AML-1 and LEF-1) (Aly/REF export factor) (Transcriptional coactivator Aly/REF) (bZIP-enhancing factor BEF)	ALYREF ALY BEF THOC4	Homo sapiens (Human)	257
HPV-31_L1	P62249	RS16	0.00844229	0.832198	0.0900055	0.318508	ME6.20,ME7.22,ME8.10,ME9.12	RS16_HUMAN	reviewed	40S ribosomal protein S16	RPS16	Homo sapiens (Human)	146
HPV-31_E5	P84098	RL19	0.00281029	0.830753	0.0906386	0.318463	ME5.14,ME7.17,ME8.6,ME9.6	RL19_HUMAN	reviewed	60S ribosomal protein L19	RPL19	Homo sapiens (Human)	196
HPV-31_L1	P30050	RL12	0.00508336	0.851008	0.0814062	0.318397	ME6.20,ME7.22,ME8.10,ME9.12	RL12_HUMAN	reviewed	60S ribosomal protein L12	RPL12	Homo sapiens (Human)	165
HPV-31_L1	P38159	RBMX	0.00211117	0.839367	0.086332	0.318164	ME6.20,ME7.22,ME8.10,ME9.12	RBMX_HUMAN	reviewed	RNA-binding motif protein, X chromosome (Glycoprotein p43) (Heterogeneous nuclear ribonucleoprotein G) (hnRNP G) [Cleaved into: RNA-binding motif protein, X chromosome, N-terminally processed]	RBMX HNRPG RBMXP1	Homo sapiens (Human)	391
HPV-31_E6	Q9UN86	G3BP2	0.00336692	0.874825	0.0700654	0.31796	ME5.18,ME6.17,ME7.18,ME8.2,ME9.5	G3BP2_HUMAN	reviewed	Ras GTPase-activating protein-binding protein 2 (G3BP-2) (GAP SH3 domain-binding protein 2)	G3BP2 KIAA0660	Homo sapiens (Human)	482
HPV-31_E2	P63267	ACTH	0.00328359	0.617688	0.185786	0.317953	ME6.19,ME7.21,ME9.9	ACTH_HUMAN	reviewed	Actin, gamma-enteric smooth muscle (Alpha-actin-3) (Gamma-2-actin) (Smooth muscle gamma-actin)	ACTG2 ACTA3 ACTL3 ACTSG	Homo sapiens (Human)	376
HPV-31_E2	P62736	ACTA	0.00327497	0.617688	0.185786	0.317953	ME6.19,ME7.21,ME9.9	ACTA_HUMAN	reviewed	Actin, aortic smooth muscle (Alpha-actin-2) (Cell growth-inhibiting gene 46 protein)	ACTA2 ACTSA ACTVS GIG46	Homo sapiens (Human)	377
HPV-31_E8^E2C	P31942	HNRH3	0.000984429	0.633756	0.17804	0.317587	ME7.15,ME8.4,ME9.2	HNRH3_HUMAN	reviewed	Heterogeneous nuclear ribonucleoprotein H3 (hnRNP H3) (Heterogeneous nuclear ribonucleoprotein 2H9) (hnRNP 2H9)	HNRNPH3 HNRPH3	Homo sapiens (Human)	346
HPV-31_E5	P30050	RL12	0.00698505	0.780176	0.11186	0.317431	ME5.14,ME7.17,ME8.6,ME9.6	RL12_HUMAN	reviewed	60S ribosomal protein L12	RPL12	Homo sapiens (Human)	165
HPV-31_L1	Q13310	PABP4	0.00500955	0.827603	0.0902524	0.317239	ME6.20,ME7.22,ME8.10,ME9.12	PABP4_HUMAN	reviewed	Polyadenylate-binding protein 4 (PABP-4) (Poly(A)-binding protein 4) (Activated-platelet protein 1) (APP-1) (Inducible poly(A)-binding protein) (iPABP)	PABPC4 APP1 PABP4	Homo sapiens (Human)	644
HPV-31_E6	Q7L2H7	EIF3M	0.00054589	0.681584	0.155957	0.317202	ME5.18,ME7.18,ME9.5	EIF3M_HUMAN	reviewed	Eukaryotic translation initiation factor 3 subunit M (eIF3m) (Fetal lung protein B5) (hFL-B5) (PCI domain-containing protein 1)	EIF3M HFLB5 PCID1 GA17 PNAS-125	Homo sapiens (Human)	374
HPV-31_E1^E4	Q99729	ROAA	0.00183038	0.649088	0.170474	0.317136	ME6.16,ME7.16,ME9.3	ROAA_HUMAN	reviewed	Heterogeneous nuclear ribonucleoprotein A/B (hnRNP A/B) (APOBEC1-binding protein 1) (ABBP-1)	HNRNPAB ABBP1 HNRPAB	Homo sapiens (Human)	332
HPV-31_L1	Q9Y3I0	RTCB	0.002671	0.72375	0.136068	0.316591	ME6.20,ME7.22,ME8.10,ME9.12	RTCB_HUMAN	reviewed	tRNA-splicing ligase RtcB homolog (EC 6.5.1.3)	C22orf28 HSPC117	Homo sapiens (Human)	505
HPV-31_E7	P05198	IF2A	9.61219e-05	6.21335e-11	0.461465	0.316339	ME7.19	IF2A_HUMAN	reviewed	Eukaryotic translation initiation factor 2 subunit 1 (Eukaryotic translation initiation factor 2 subunit alpha) (eIF-2-alpha) (eIF-2A) (eIF-2alpha)	EIF2S1 EIF2A	Homo sapiens (Human)	315
HPV-31_E1	P52272	HNRPM	0.00219494	0.869618	0.0698089	0.316171	ME5.21,ME6.22,ME7.23,ME8.11,ME9.10	HNRPM_HUMAN	reviewed	Heterogeneous nuclear ribonucleoprotein M (hnRNP M)	HNRNPM HNRPM NAGR1	Homo sapiens (Human)	730
HPV-31_L2	Q99729	ROAA	0.00111999	0.799353	0.101429	0.316161	ME6.21,ME7.20,ME8.7,ME9.7	ROAA_HUMAN	reviewed	Heterogeneous nuclear ribonucleoprotein A/B (hnRNP A/B) (APOBEC1-binding protein 1) (ABBP-1)	HNRNPAB ABBP1 HNRPAB	Homo sapiens (Human)	332
HPV-31_E1	Q02878	RL6	0.00595443	0.687208	0.151767	0.316098	ME5.21,ME7.23,ME8.11,ME9.10	RL6_HUMAN	reviewed	60S ribosomal protein L6 (Neoplasm-related protein C140) (Tax-responsive enhancer element-binding protein 107) (TaxREB107)	RPL6 TXREB1	Homo sapiens (Human)	288
HPV-31_E1	Q04637	IF4G1	0.000189773	0.663252	0.162571	0.316078	ME7.23,ME8.11,ME9.10	IF4G1_HUMAN	reviewed	Eukaryotic translation initiation factor 4 gamma 1 (eIF-4-gamma 1) (eIF-4G 1) (eIF-4G1) (p220)	EIF4G1 EIF4F EIF4G EIF4GI	Homo sapiens (Human)	1599
HPV-31_L1	Q00577	PURA	0.000102774	6.21335e-11	0.461059	0.316061	ME7.22	PURA_HUMAN	reviewed	Transcriptional activator protein Pur-alpha (Purine-rich single-stranded DNA-binding protein alpha)	PURA PUR1	Homo sapiens (Human)	322
HPV-31_L1	P11498	PYC	0.0161059	0.752826	0.122029	0.316017	ME5.23,ME6.20,ME7.22,ME8.10,ME9.12	PYC_HUMAN	reviewed	Pyruvate carboxylase, mitochondrial (EC 6.4.1.1) (Pyruvic carboxylase) (PCB)	PC	Homo sapiens (Human)	1178
HPV-31_E7	Q8WVX9	FACR1	5.84934e-05	6.21335e-11	0.460902	0.315953	ME7.19	FACR1_HUMAN	reviewed	Fatty acyl-CoA reductase 1 (EC 1.2.1.n2) (Male sterility domain-containing protein 2)	FAR1 MLSTD2 UNQ2423/PRO4981	Homo sapiens (Human)	515
HPV-31_L1	P62753	RS6	0.00516641	0.849364	0.0785473	0.31593	ME6.20,ME7.22,ME8.10,ME9.12	RS6_HUMAN	reviewed	40S ribosomal protein S6 (Phosphoprotein NP33)	RPS6 OK/SW-cl.2	Homo sapiens (Human)	249
HPV-31_E7	Q14444	CAPR1	0.000846794	0.810822	0.0954858	0.315624	ME6.23,ME7.19,ME8.8,ME9.8	CAPR1_HUMAN	reviewed	Caprin-1 (Cell cycle-associated protein 1) (Cytoplasmic activation- and proliferation-associated protein 1) (GPI-anchored membrane protein 1) (GPI-anchored protein p137) (GPI-p137) (p137GPI) (Membrane component chromosome 11 surface marker 1) (RNA granule protein 105)	CAPRIN1 GPIAP1 GPIP137 M11S1 RNG105	Homo sapiens (Human)	709
HPV-31_E1	P14866	HNRPL	0.00212274	0.657394	0.164288	0.315459	ME6.22,ME7.23,ME8.11,ME9.10	HNRPL_HUMAN	reviewed	Heterogeneous nuclear ribonucleoprotein L (hnRNP L)	HNRNPL HNRPL P/OKcl.14	Homo sapiens (Human)	589
HPV-31_E2	P07305	H10	0.00101662	0.408712	0.276216	0.315455	ME7.21,ME9.9	H10_HUMAN	reviewed	Histone H1.0 (Histone H1') (Histone H1(0))	H1F0 H1FV	Homo sapiens (Human)	194
HPV-31_E7	P31943	HNRH1	0.00220236	0.847206	0.0784562	0.315184	ME5.19,ME6.23,ME7.19,ME9.8	HNRH1_HUMAN	reviewed	Heterogeneous nuclear ribonucleoprotein H (hnRNP H) [Cleaved into: Heterogeneous nuclear ribonucleoprotein H, N-terminally processed]	HNRNPH1 HNRPH HNRPH1	Homo sapiens (Human)	449
HPV-31_E7	P40429	RL13A	0.00363872	0.731372	0.130505	0.315134	ME5.19,ME7.19,ME8.8,ME9.8	RL13A_HUMAN	reviewed	60S ribosomal protein L13a (23 kDa highly basic protein)	RPL13A	Homo sapiens (Human)	203
HPV-31_E7	P11142	HSP7C	0.0213501	0.837156	0.0824907	0.314963	ME5.19,ME6.23,ME7.19,ME8.8,ME9.8	HSP7C_HUMAN	reviewed	Heat shock cognate 71 kDa protein (Heat shock 70 kDa protein 8)	HSPA8 HSC70 HSP73 HSPA10	Homo sapiens (Human)	646
HPV-31_E1^E4	Q9Y2A7	NCKP1	0.000841068	0.731437	0.130104	0.314863	ME5.17,ME6.16,ME7.16,ME9.3	NCKP1_HUMAN	reviewed	Nck-associated protein 1 (NAP 1) (Membrane-associated protein HEM-2) (p125Nap1)	NCKAP1 HEM2 KIAA0587 NAP1	Homo sapiens (Human)	1128
HPV-31_E2	P68032	ACTC	0.00327497	0.617688	0.181014	0.314682	ME6.19,ME7.21,ME9.9	ACTC_HUMAN	reviewed	Actin, alpha cardiac muscle 1 (Alpha-cardiac actin)	ACTC1 ACTC	Homo sapiens (Human)	377
HPV-31_E2	P68133	ACTS	0.00326639	0.617688	0.181014	0.314682	ME6.19,ME7.21,ME9.9	ACTS_HUMAN	reviewed	Actin, alpha skeletal muscle (Alpha-actin-1)	ACTA1 ACTA	Homo sapiens (Human)	377
HPV-31_E6	P62263	RS14	0.00517608	0.817668	0.0909628	0.314662	ME5.18,ME6.17,ME7.18,ME9.5	RS14_HUMAN	reviewed	40S ribosomal protein S14	RPS14 PRO2640	Homo sapiens (Human)	151
HPV-31_E7	P07437	TBB5	0.0147641	0.846689	0.077548	0.314477	ME6.23,ME7.19,ME8.8,ME9.8	TBB5_HUMAN	reviewed	Tubulin beta chain (Tubulin beta-5 chain)	TUBB TUBB5 OK/SW-cl.56	Homo sapiens (Human)	444
HPV-31_E8^E2C	Q8TAF8	TMHS	0.000243847	6.21335e-11	0.458606	0.31438	ME9.2	TMHS_HUMAN	reviewed	Tetraspan membrane protein of hair cell stereocilia (Lipoma HMGIC fusion partner-like 5 protein)	LHFPL5 TMHS	Homo sapiens (Human)	219
HPV-31_E6	P25398	RS12	0.0059074	0.763166	0.114973	0.31431	ME5.18,ME7.18,ME8.2,ME9.5	RS12_HUMAN	reviewed	40S ribosomal protein S12	RPS12	Homo sapiens (Human)	132
HPV-31_E7	P48741	HSP77	0.00438356	0.858224	0.0719958	0.314168	ME5.19,ME6.23,ME7.19,ME8.8,ME9.8	HSP77_HUMAN	reviewed	Putative heat shock 70 kDa protein 7 (Heat shock 70 kDa protein B)	HSPA7 HSP70B	Homo sapiens (Human)	367
HPV-31_L2	Q13310	PABP4	0.00414376	0.852262	0.0746544	0.314149	ME5.22,ME6.21,ME7.20,ME9.7	PABP4_HUMAN	reviewed	Polyadenylate-binding protein 4 (PABP-4) (Poly(A)-binding protein 4) (Activated-platelet protein 1) (APP-1) (Inducible poly(A)-binding protein) (iPABP)	PABPC4 APP1 PABP4	Homo sapiens (Human)	644
HPV-31_L2	Q3ZCM7	TBB8	0.00581122	0.675788	0.154031	0.314125	ME5.22,ME6.21,ME9.7	TBB8_HUMAN	reviewed	Tubulin beta-8 chain	TUBB8	Homo sapiens (Human)	444
HPV-31_E2	Q5JSJ4	DX26B	0.000191156	6.21335e-11	0.458054	0.314002	ME6.19	DX26B_HUMAN	reviewed	Protein DDX26B	DDX26B	Homo sapiens (Human)	861
HPV-31_E7	P34931	HS71L	0.00755587	0.832365	0.0831162	0.313831	ME5.19,ME6.23,ME7.19,ME8.8,ME9.8	HS71L_HUMAN	reviewed	Heat shock 70 kDa protein 1-like (Heat shock 70 kDa protein 1L) (Heat shock 70 kDa protein 1-Hom) (HSP70-Hom)	HSPA1L	Homo sapiens (Human)	641
HPV-31_E8^E2C	P40429	RL13A	0.00261622	0.794791	0.0998737	0.313697	ME5.15,ME7.15,ME8.4,ME9.2	RL13A_HUMAN	reviewed	60S ribosomal protein L13a (23 kDa highly basic protein)	RPL13A	Homo sapiens (Human)	203
HPV-31_E7	Q7Z417	NUFP2	0.0057375	0.853281	0.073379	0.313599	ME6.23,ME7.19,ME8.8,ME9.8	NUFP2_HUMAN	reviewed	Nuclear fragile X mental retardation-interacting protein 2 (82 kDa FMRP-interacting protein) (82-FIP) (Cell proliferation-inducing gene 1 protein) (FMRP-interacting protein 2)	NUFIP2 KIAA1321 PIG1	Homo sapiens (Human)	695
HPV-31_E2	P52272	HNRPM	0.0031413	0.794146	0.0998264	0.313469	ME6.19,ME7.21,ME8.9,ME9.9	HNRPM_HUMAN	reviewed	Heterogeneous nuclear ribonucleoprotein M (hnRNP M)	HNRNPM HNRPM NAGR1	Homo sapiens (Human)	730
HPV-31_L1	P52272	HNRPM	0.00273092	0.847812	0.0755507	0.313383	ME6.20,ME7.22,ME8.10,ME9.12	HNRPM_HUMAN	reviewed	Heterogeneous nuclear ribonucleoprotein M (hnRNP M)	HNRNPM HNRPM NAGR1	Homo sapiens (Human)	730
HPV-31_E6	P30050	RL12	0.00542088	0.822481	0.0868112	0.313302	ME5.18,ME7.18,ME8.2,ME9.5	RL12_HUMAN	reviewed	60S ribosomal protein L12	RPL12	Homo sapiens (Human)	165
HPV-31_E2	P50914	RL14	0.00454447	0.775418	0.107865	0.313209	ME5.20,ME6.19,ME7.21,ME9.9	RL14_HUMAN	reviewed	60S ribosomal protein L14 (CAG-ISL 7)	RPL14	Homo sapiens (Human)	215
HPV-31_E6	O60814	H2B1K	0.0122862	0.834582	0.0810909	0.313155	ME5.18,ME6.17,ME7.18,ME8.2,ME9.5	H2B1K_HUMAN	reviewed	Histone H2B type 1-K (H2B K) (HIRA-interacting protein 1)	HIST1H2BK H2BFT HIRIP1	Homo sapiens (Human)	126
HPV-31_E1	P82914	RT15	0.000415697	6.21335e-11	0.456805	0.313147	ME8.11	RT15_HUMAN	reviewed	28S ribosomal protein S15, mitochondrial (MRP-S15) (S15mt)	MRPS15 RPMS15 DC37	Homo sapiens (Human)	257
HPV-31_E5	P07437	TBB5	0.0158477	0.829278	0.0832394	0.313013	ME6.18,ME7.17,ME8.6,ME9.6	TBB5_HUMAN	reviewed	Tubulin beta chain (Tubulin beta-5 chain)	TUBB TUBB5 OK/SW-cl.56	Homo sapiens (Human)	444
HPV-31_E1^E4	P16401	H15	0.00317258	0.818487	0.0880911	0.312934	ME6.16,ME7.16,ME8.5,ME9.3	H15_HUMAN	reviewed	Histone H1.5 (Histone H1a) (Histone H1b) (Histone H1s-3)	HIST1H1B H1F5	Homo sapiens (Human)	226
HPV-31_E7	P25398	RS12	0.00530782	0.784212	0.103304	0.3128	ME6.23,ME7.19,ME8.8,ME9.8	RS12_HUMAN	reviewed	40S ribosomal protein S12	RPS12	Homo sapiens (Human)	132
HPV-31_E1^E4	O95816	BAG2	0.00240654	0.811752	0.0908984	0.312776	ME5.17,ME7.16,ME8.5,ME9.3	BAG2_HUMAN	reviewed	BAG family molecular chaperone regulator 2 (BAG-2) (Bcl-2-associated athanogene 2)	BAG2	Homo sapiens (Human)	211
HPV-31_L2	O14925	TIM23	0.000132934	6.21335e-11	0.456243	0.31276	ME7.20	TIM23_HUMAN	reviewed	Mitochondrial import inner membrane translocase subunit Tim23	TIMM23 TIM23	Homo sapiens (Human)	209
HPV-31_L2	P31153	METK2	6.68025e-05	6.21335e-11	0.456243	0.31276	ME7.20	METK2_HUMAN	reviewed	S-adenosylmethionine synthase isoform type-2 (AdoMet synthase 2) (EC 2.5.1.6) (Methionine adenosyltransferase 2) (MAT 2) (Methionine adenosyltransferase II) (MAT-II)	MAT2A AMS2 MATA2	Homo sapiens (Human)	395
HPV-31_E5	P55884	EIF3B	0.00160383	0.676422	0.151668	0.312676	ME5.14,ME7.17,ME9.6	EIF3B_HUMAN	reviewed	Eukaryotic translation initiation factor 3 subunit B (eIF3b) (Eukaryotic translation initiation factor 3 subunit 9) (Prt1 homolog) (hPrt1) (eIF-3-eta) (eIF3 p110) (eIF3 p116)	EIF3B EIF3S9	Homo sapiens (Human)	814
HPV-31_E1^E4	P62805	H4	0.0124342	0.767109	0.110641	0.312596	ME6.16,ME7.16,ME8.5,ME9.3	H4_HUMAN	reviewed	Histone H4	HIST1H4A H4/A H4FA; HIST1H4B H4/I H4FI; HIST1H4C H4/G H4FG; HIST1H4D H4/B H4FB; HIST1H4E H4/J H4FJ;	Homo sapiens (Human)	103
HPV-31_E7	O60814	H2B1K	0.00978852	0.869389	0.0646057	0.312579	ME5.19,ME6.23,ME7.19,ME8.8,ME9.8	H2B1K_HUMAN	reviewed	Histone H2B type 1-K (H2B K) (HIRA-interacting protein 1)	HIST1H2BK H2BFT HIRIP1	Homo sapiens (Human)	126
HPV-31_E7	P17066	HSP76	0.00451032	0.859411	0.0689304	0.312433	ME5.19,ME6.23,ME7.19,ME8.8,ME9.8	HSP76_HUMAN	reviewed	Heat shock 70 kDa protein 6 (Heat shock 70 kDa protein B')	HSPA6 HSP70B'	Homo sapiens (Human)	643
HPV-31_E1^E4	P40429	RL13A	0.00247632	0.782539	0.103302	0.312266	ME5.17,ME7.16,ME8.5,ME9.3	RL13A_HUMAN	reviewed	60S ribosomal protein L13a (23 kDa highly basic protein)	RPL13A	Homo sapiens (Human)	203
HPV-31_L1	P83731	RL24	0.00547482	0.839345	0.0775479	0.312156	ME6.20,ME7.22,ME8.10,ME9.12	RL24_HUMAN	reviewed	60S ribosomal protein L24 (60S ribosomal protein L30)	RPL24	Homo sapiens (Human)	157
HPV-31_E1	P31943	HNRH1	0.00212153	0.823273	0.0847538	0.312117	ME5.21,ME6.22,ME7.23,ME9.10	HNRH1_HUMAN	reviewed	Heterogeneous nuclear ribonucleoprotein H (hnRNP H) [Cleaved into: Heterogeneous nuclear ribonucleoprotein H, N-terminally processed]	HNRNPH1 HNRPH HNRPH1	Homo sapiens (Human)	449
HPV-31_E7	Q13310	PABP4	0.00434949	0.836926	0.0783608	0.31196	ME6.23,ME7.19,ME8.8,ME9.8	PABP4_HUMAN	reviewed	Polyadenylate-binding protein 4 (PABP-4) (Poly(A)-binding protein 4) (Activated-platelet protein 1) (APP-1) (Inducible poly(A)-binding protein) (iPABP)	PABPC4 APP1 PABP4	Homo sapiens (Human)	644
HPV-31_E7	P62318	SMD3	0.00210394	0.766337	0.11005	0.311891	ME6.23,ME7.19,ME8.8,ME9.8	SMD3_HUMAN	reviewed	Small nuclear ribonucleoprotein Sm D3 (Sm-D3) (snRNP core protein D3)	SNRPD3	Homo sapiens (Human)	126
HPV-31_E6	P11498	PYC	0.00971117	0.846925	0.0735783	0.311798	ME5.18,ME6.17,ME7.18,ME8.2,ME9.5	PYC_HUMAN	reviewed	Pyruvate carboxylase, mitochondrial (EC 6.4.1.1) (Pyruvic carboxylase) (PCB)	PC	Homo sapiens (Human)	1178
HPV-31_E7	P57721	PCBP3	0.000521366	0.397398	0.275905	0.311748	ME6.23,ME7.19	PCBP3_HUMAN	reviewed	Poly(rC)-binding protein 3 (Alpha-CP3)	PCBP3	Homo sapiens (Human)	371
HPV-31_E5	P42677	RS27	0.00856249	0.796007	0.0959807	0.311439	ME6.18,ME7.17,ME8.6,ME9.6	RS27_HUMAN	reviewed	40S ribosomal protein S27 (Metallopan-stimulin 1) (MPS-1)	RPS27 MPS1	Homo sapiens (Human)	84
HPV-31_E1	P61247	RS3A	0.00403197	0.801975	0.0928895	0.311134	ME5.21,ME7.23,ME8.11,ME9.10	RS3A_HUMAN	reviewed	40S ribosomal protein S3a (v-fos transformation effector protein) (Fte-1)	RPS3A FTE1 MFTL	Homo sapiens (Human)	264
HPV-31_E5	P68104	EF1A1	0.00389053	0.856687	0.0680462	0.310983	ME6.18,ME7.17,ME8.6,ME9.6	EF1A1_HUMAN	reviewed	Elongation factor 1-alpha 1 (EF-1-alpha-1) (Elongation factor Tu) (EF-Tu) (Eukaryotic elongation factor 1 A-1) (eEF1A-1) (Leukocyte receptor cluster member 7)	EEF1A1 EEF1A EF1A LENG7	Homo sapiens (Human)	462
HPV-31_E7	P47756	CAPZB	0.000144553	6.21335e-11	0.453297	0.310741	ME6.23	CAPZB_HUMAN	reviewed	F-actin-capping protein subunit beta (CapZ beta)	CAPZB	Homo sapiens (Human)	277
HPV-31_E1^E4	P46782	RS5	0.00182934	0.813328	0.0869642	0.310562	ME6.16,ME7.16,ME8.5,ME9.3	RS5_HUMAN	reviewed	40S ribosomal protein S5 [Cleaved into: 40S ribosomal protein S5, N-terminally processed]	RPS5	Homo sapiens (Human)	204
HPV-31_E5	P62316	SMD2	0.00556228	0.391775	0.276345	0.310345	ME5.14,ME8.6	SMD2_HUMAN	reviewed	Small nuclear ribonucleoprotein Sm D2 (Sm-D2) (snRNP core protein D2)	SNRPD2 SNRPD1	Homo sapiens (Human)	118
HPV-31_E8^E2C	O60814	H2B1K	0.0126436	0.809772	0.0878053	0.310106	ME5.15,ME7.15,ME8.4,ME9.2	H2B1K_HUMAN	reviewed	Histone H2B type 1-K (H2B K) (HIRA-interacting protein 1)	HIST1H2BK H2BFT HIRIP1	Homo sapiens (Human)	126
HPV-31_E7	P46782	RS5	0.00327315	0.680501	0.14604	0.310086	ME6.23,ME7.19,ME9.8	RS5_HUMAN	reviewed	40S ribosomal protein S5 [Cleaved into: 40S ribosomal protein S5, N-terminally processed]	RPS5	Homo sapiens (Human)	204
HPV-31_E6	Q562R1	ACTBL	0.00146769	0.796714	0.0937045	0.310054	ME5.18,ME6.17,ME7.18,ME9.5	ACTBL_HUMAN	reviewed	Beta-actin-like protein 2 (Kappa-actin)	ACTBL2	Homo sapiens (Human)	376
HPV-31_E6	P16401	H15	0.00277884	0.844526	0.0717416	0.309758	ME5.18,ME6.17,ME7.18,ME9.5	H15_HUMAN	reviewed	Histone H1.5 (Histone H1a) (Histone H1b) (Histone H1s-3)	HIST1H1B H1F5	Homo sapiens (Human)	226
HPV-31_E1^E4	P62424	RL7A	0.00428467	0.831604	0.0775197	0.309741	ME5.17,ME7.16,ME8.5,ME9.3	RL7A_HUMAN	reviewed	60S ribosomal protein L7a (PLA-X polypeptide) (Surfeit locus protein 3)	RPL7A SURF-3 SURF3	Homo sapiens (Human)	266
HPV-31_L1	Q562R1	ACTBL	0.00114005	0.841888	0.0727865	0.30965	ME6.20,ME7.22,ME8.10,ME9.12	ACTBL_HUMAN	reviewed	Beta-actin-like protein 2 (Kappa-actin)	ACTBL2	Homo sapiens (Human)	376
HPV-31_E7	P08107	HSP71	0.0118441	0.856173	0.0659567	0.30944	ME5.19,ME6.23,ME7.19,ME8.8,ME9.8	HSP71_HUMAN	reviewed	Heat shock 70 kDa protein 1A/1B (Heat shock 70 kDa protein 1/2) (HSP70-1/HSP70-2) (HSP70.1/HSP70.2)	HSPA1A HSPA1; HSPA1B	Homo sapiens (Human)	641
HPV-31_L1	Q9NVC3	S38A7	0.000470119	0.835587	0.0751361	0.309313	ME6.20,ME7.22,ME8.10,ME9.12	S38A7_HUMAN	reviewed	Putative sodium-coupled neutral amino acid transporter 7	SLC38A7 SNAT7	Homo sapiens (Human)	462
HPV-31_E2	Q14152	EIF3A	0.000690521	0.67543	0.147167	0.309279	ME5.20,ME7.21,ME9.9	EIF3A_HUMAN	reviewed	Eukaryotic translation initiation factor 3 subunit A (eIF3a) (Eukaryotic translation initiation factor 3 subunit 10) (eIF-3-theta) (eIF3 p167) (eIF3 p180) (eIF3 p185)	EIF3A EIF3S10 KIAA0139	Homo sapiens (Human)	1382
HPV-31_E5	Q14974	IMB1	0.000250444	0.396918	0.272358	0.309167	ME6.18,ME9.6	IMB1_HUMAN	reviewed	Importin subunit beta-1 (Importin-90) (Karyopherin subunit beta-1) (Nuclear factor p97) (Pore targeting complex 97 kDa subunit) (PTAC97)	KPNB1 NTF97	Homo sapiens (Human)	876
HPV-31_L1	Q9BYJ9	YTHD1	0.000117827	6.21335e-11	0.450862	0.309071	ME7.22	YTHD1_HUMAN	reviewed	YTH domain family protein 1 (Dermatomyositis associated with cancer putative autoantigen 1) (DACA-1)	YTHDF1 C20orf21	Homo sapiens (Human)	559
HPV-31_E5	P04350	TBB4A	0.00999494	0.78475	0.0974794	0.309002	ME5.14,ME6.18,ME7.17,ME8.6	TBB4A_HUMAN	reviewed	Tubulin beta-4A chain (Tubulin 5 beta) (Tubulin beta-4 chain)	TUBB4A TUBB4 TUBB5	Homo sapiens (Human)	444
HPV-31_E5	P36578	RL4	0.00405977	0.884679	0.0524951	0.30896	ME5.14,ME6.18,ME7.17,ME8.6,ME9.6	RL4_HUMAN	reviewed	60S ribosomal protein L4 (60S ribosomal protein L1)	RPL4 RPL1	Homo sapiens (Human)	427
HPV-31_E6	P46782	RS5	0.00155409	0.846763	0.0693399	0.308794	ME5.18,ME7.18,ME8.2,ME9.5	RS5_HUMAN	reviewed	40S ribosomal protein S5 [Cleaved into: 40S ribosomal protein S5, N-terminally processed]	RPS5	Homo sapiens (Human)	204
HPV-31_E5	P10809	CH60	0.00119353	0.815115	0.0835077	0.30874	ME6.18,ME7.17,ME8.6,ME9.6	CH60_HUMAN	reviewed	60 kDa heat shock protein, mitochondrial (60 kDa chaperonin) (Chaperonin 60) (CPN60) (Heat shock protein 60) (HSP-60) (Hsp60) (HuCHA60) (Mitochondrial matrix protein P1) (P60 lymphocyte protein)	HSPD1 HSP60	Homo sapiens (Human)	573
HPV-31_L2	P62280	RS11	0.00298658	0.813938	0.0834757	0.308366	ME5.22,ME6.21,ME7.20,ME9.7	RS11_HUMAN	reviewed	40S ribosomal protein S11	RPS11	Homo sapiens (Human)	158
HPV-31_L2	P08865	RSSA	0.00165479	0.811592	0.0842042	0.308133	ME5.22,ME7.20,ME8.7,ME9.7	RSSA_HUMAN	reviewed	40S ribosomal protein SA (37 kDa laminin receptor precursor) (37LRP) (37/67 kDa laminin receptor) (LRP/LR) (67 kDa laminin receptor) (67LR) (Colon carcinoma laminin-binding protein) (Laminin receptor 1) (LamR) (Laminin-binding protein precursor p40) (LBP/p40) (Multidrug resistance-associated protein MGr1-Ag) (NEM/1CHD4)	RPSA LAMBR LAMR1	Homo sapiens (Human)	295
HPV-31_E5	O00487	PSDE	0.000474241	6.21335e-11	0.449352	0.308038	ME9.6	PSDE_HUMAN	reviewed	26S proteasome non-ATPase regulatory subunit 14 (EC 3.4.19.-) (26S proteasome regulatory subunit RPN11) (26S proteasome-associated PAD1 homolog 1)	PSMD14 POH1	Homo sapiens (Human)	310
HPV-31_E1^E4	P18124	RL7	0.00273247	0.85818	0.0630129	0.307987	ME5.17,ME7.16,ME8.5,ME9.3	RL7_HUMAN	reviewed	60S ribosomal protein L7	RPL7	Homo sapiens (Human)	248
HPV-31_E2	Q92600	RCD1	0.000199121	6.21335e-11	0.449241	0.30796	ME9.9	RCD1_HUMAN	reviewed	Cell differentiation protein RCD1 homolog (Rcd-1) (CCR4-NOT transcription complex subunit 9)	RQCD1 CNOT9 RCD1	Homo sapiens (Human)	299
HPV-31_E7	P63208	SKP1	0.000557646	0.396007	0.270591	0.307676	ME7.19,ME9.8	SKP1_HUMAN	reviewed	S-phase kinase-associated protein 1 (Cyclin-A/CDK2-associated protein p19) (Organ of Corti protein 2) (OCP-2) (Organ of Corti protein II) (OCP-II) (RNA polymerase II elongation factor-like protein) (SIII) (Transcription elongation factor B) (p19A) (p19skp1)	SKP1 EMC19 OCP2 SKP1A TCEB1L	Homo sapiens (Human)	163
HPV-31_L1	P62913	RL11	0.00402664	0.826997	0.0765461	0.307651	ME6.20,ME7.22,ME8.10,ME9.12	RL11_HUMAN	reviewed	60S ribosomal protein L11 (CLL-associated antigen KW-12)	RPL11	Homo sapiens (Human)	178
HPV-31_E1	P0CG47	UBB	0.00353798	0.793125	0.0916691	0.307564	ME5.21,ME6.22,ME8.11,ME9.10	UBB_HUMAN	reviewed	Polyubiquitin-B [Cleaved into: Ubiquitin]	UBB	Homo sapiens (Human)	229
HPV-31_E5	P26196	DDX6	0.00760915	0.860191	0.0614426	0.307559	ME6.18,ME7.17,ME8.6,ME9.6	DDX6_HUMAN	reviewed	Probable ATP-dependent RNA helicase DDX6 (EC 3.6.4.13) (ATP-dependent RNA helicase p54) (DEAD box protein 6) (Oncogene RCK)	DDX6 HLR2 RCK	Homo sapiens (Human)	483
HPV-31_L2	Q6P161	RM54	0.00220679	0.779297	0.0978161	0.307504	ME6.21,ME7.20,ME8.7,ME9.7	RM54_HUMAN	reviewed	39S ribosomal protein L54, mitochondrial (L54mt) (MRP-L54)	MRPL54	Homo sapiens (Human)	138
HPV-31_E1	Q9BUT9	F195A	0.00317643	0.610976	0.173503	0.307461	ME5.21,ME7.23,ME9.10	F195A_HUMAN	reviewed	Protein FAM195A	FAM195A C16orf14	Homo sapiens (Human)	160
HPV-31_L1	Q7Z417	NUFP2	0.0049342	0.855769	0.0631054	0.307319	ME6.20,ME7.22,ME8.10,ME9.12	NUFP2_HUMAN	reviewed	Nuclear fragile X mental retardation-interacting protein 2 (82 kDa FMRP-interacting protein) (82-FIP) (Cell proliferation-inducing gene 1 protein) (FMRP-interacting protein 2)	NUFIP2 KIAA1321 PIG1	Homo sapiens (Human)	695
HPV-31_E6	P31689	DNJA1	0.00228582	0.823766	0.0774837	0.307286	ME5.18,ME6.17,ME7.18,ME8.2	DNJA1_HUMAN	reviewed	DnaJ homolog subfamily A member 1 (DnaJ protein homolog 2) (HSDJ) (Heat shock 40 kDa protein 4) (Heat shock protein J2) (HSJ-2) (Human DnaJ protein 2) (hDj-2)	DNAJA1 DNAJ2 HDJ2 HSJ2 HSPF4	Homo sapiens (Human)	397
HPV-31_L2	Q01844	EWS	4.25302e-05	6.21335e-11	0.448119	0.30719	ME7.20	EWS_HUMAN	reviewed	RNA-binding protein EWS (EWS oncogene) (Ewing sarcoma breakpoint region 1 protein)	EWSR1 EWS	Homo sapiens (Human)	656
HPV-31_E2	P62857	RS28	0.0160645	0.715815	0.125235	0.306796	ME5.20,ME6.19,ME7.21,ME8.9	RS28_HUMAN	reviewed	40S ribosomal protein S28	RPS28	Homo sapiens (Human)	69
HPV-31_E8^E2C	P08865	RSSA	0.00239209	0.668946	0.14611	0.306564	ME5.15,ME7.15,ME9.2	RSSA_HUMAN	reviewed	40S ribosomal protein SA (37 kDa laminin receptor precursor) (37LRP) (37/67 kDa laminin receptor) (LRP/LR) (67 kDa laminin receptor) (67LR) (Colon carcinoma laminin-binding protein) (Laminin receptor 1) (LamR) (Laminin-binding protein precursor p40) (LBP/p40) (Multidrug resistance-associated protein MGr1-Ag) (NEM/1CHD4)	RPSA LAMBR LAMR1	Homo sapiens (Human)	295
HPV-31_E5	Q08170	SRSF4	0.000501543	0.670841	0.145215	0.306524	ME7.17,ME8.6,ME9.6	SRSF4_HUMAN	reviewed	Serine/arginine-rich splicing factor 4 (Pre-mRNA-splicing factor SRP75) (SRP001LB) (Splicing factor, arginine/serine-rich 4)	SRSF4 SFRS4 SRP75	Homo sapiens (Human)	494
HPV-31_E6	P07910	HNRPC	0.00292005	0.756271	0.10649	0.30635	ME6.17,ME7.18,ME8.2,ME9.5	HNRPC_HUMAN	reviewed	Heterogeneous nuclear ribonucleoproteins C1/C2 (hnRNP C1/C2)	HNRNPC HNRPC	Homo sapiens (Human)	306
HPV-31_E1	P23396	RS3	0.00735927	0.723121	0.121238	0.306258	ME6.22,ME7.23,ME8.11,ME9.10	RS3_HUMAN	reviewed	40S ribosomal protein S3	RPS3 OK/SW-cl.26	Homo sapiens (Human)	243
HPV-31_E7	P11940	PABP1	0.00683443	0.858035	0.0605139	0.306253	ME6.23,ME7.19,ME8.8,ME9.8	PABP1_HUMAN	reviewed	Polyadenylate-binding protein 1 (PABP-1) (Poly(A)-binding protein 1)	PABPC1 PAB1 PABP1 PABPC2	Homo sapiens (Human)	636
HPV-31_L1	P84098	RL19	0.00224022	0.831712	0.0722527	0.306151	ME6.20,ME7.22,ME8.10,ME9.12	RL19_HUMAN	reviewed	60S ribosomal protein L19	RPL19	Homo sapiens (Human)	196
HPV-31_E8^E2C	P42677	RS27	0.00783984	0.777108	0.0965188	0.305972	ME5.15,ME6.15,ME7.15,ME9.2	RS27_HUMAN	reviewed	40S ribosomal protein S27 (Metallopan-stimulin 1) (MPS-1)	RPS27 MPS1	Homo sapiens (Human)	84
HPV-31_E1	C9JLW8	F195B	0.0229252	0.815738	0.0789122	0.305911	ME5.21,ME6.22,ME7.23,ME8.11,ME9.10	F195B_HUMAN	reviewed	Protein FAM195B	FAM195B	Homo sapiens (Human)	97
HPV-31_E7	P26373	RL13	0.00335772	0.840097	0.0679918	0.305824	ME6.23,ME7.19,ME8.8,ME9.8	RL13_HUMAN	reviewed	60S ribosomal protein L13 (Breast basic conserved protein 1)	RPL13 BBC1 OK/SW-cl.46	Homo sapiens (Human)	211
HPV-31_L2	P46778	RL21	0.00302249	0.81608	0.0781751	0.305393	ME5.22,ME6.21,ME7.20,ME9.7	RL21_HUMAN	reviewed	60S ribosomal protein L21	RPL21	Homo sapiens (Human)	160
HPV-31_L1	P09651	ROA1	0.0042562	0.832572	0.0706106	0.305303	ME6.20,ME7.22,ME8.10,ME9.12	ROA1_HUMAN	reviewed	Heterogeneous nuclear ribonucleoprotein A1 (hnRNP A1) (Helix-destabilizing protein) (Single-strand RNA-binding protein) (hnRNP core protein A1)	HNRNPA1 HNRPA1	Homo sapiens (Human)	372
HPV-31_E6	P05386	RLA1	0.0043317	0.664958	0.146027	0.305289	ME5.18,ME7.18,ME9.5	RLA1_HUMAN	reviewed	60S acidic ribosomal protein P1	RPLP1 RRP1	Homo sapiens (Human)	114
HPV-31_E2	P31943	HNRH1	0.00192904	0.822786	0.0748358	0.305166	ME5.20,ME6.19,ME7.21,ME9.9	HNRH1_HUMAN	reviewed	Heterogeneous nuclear ribonucleoprotein H (hnRNP H) [Cleaved into: Heterogeneous nuclear ribonucleoprotein H, N-terminally processed]	HNRNPH1 HNRPH HNRPH1	Homo sapiens (Human)	449
HPV-31_E6	P52272	HNRPM	0.00237371	0.84215	0.0656688	0.304859	ME5.18,ME6.17,ME7.18,ME8.2,ME9.5	HNRPM_HUMAN	reviewed	Heterogeneous nuclear ribonucleoprotein M (hnRNP M)	HNRNPM HNRPM NAGR1	Homo sapiens (Human)	730
HPV-31_E5	P16403	H12	0.0073128	0.848319	0.0628442	0.304856	ME5.14,ME7.17,ME8.6,ME9.6	H12_HUMAN	reviewed	Histone H1.2 (Histone H1c) (Histone H1d) (Histone H1s-1)	HIST1H1C H1F2	Homo sapiens (Human)	213
HPV-31_E6	P60709	ACTB	0.00441248	0.795012	0.086813	0.304822	ME5.18,ME6.17,ME7.18,ME9.5	ACTB_HUMAN	reviewed	Actin, cytoplasmic 1 (Beta-actin) [Cleaved into: Actin, cytoplasmic 1, N-terminally processed]	ACTB	Homo sapiens (Human)	375
HPV-31_E6	P46779	RL28	0.00469669	0.83993	0.0665357	0.304783	ME5.18,ME7.18,ME8.2,ME9.5	RL28_HUMAN	reviewed	60S ribosomal protein L28	RPL28	Homo sapiens (Human)	137
HPV-31_E7	P68363	TBA1B	0.00979466	0.836302	0.0674297	0.304306	ME6.23,ME7.19,ME8.8,ME9.8	TBA1B_HUMAN	reviewed	Tubulin alpha-1B chain (Alpha-tubulin ubiquitous) (Tubulin K-alpha-1) (Tubulin alpha-ubiquitous chain)	TUBA1B	Homo sapiens (Human)	451
HPV-31_E6	P23528	COF1	0.002889	0.659911	0.146732	0.304206	ME6.17,ME7.18,ME9.5	COF1_HUMAN	reviewed	Cofilin-1 (18 kDa phosphoprotein) (p18) (Cofilin, non-muscle isoform)	CFL1 CFL	Homo sapiens (Human)	166
HPV-31_E7	P42677	RS27	0.00701067	0.810822	0.0785856	0.304076	ME6.23,ME7.19,ME8.8,ME9.8	RS27_HUMAN	reviewed	40S ribosomal protein S27 (Metallopan-stimulin 1) (MPS-1)	RPS27 MPS1	Homo sapiens (Human)	84
HPV-31_E6	Q14444	CAPR1	0.000865709	0.768005	0.0976187	0.303876	ME5.18,ME7.18,ME8.2,ME9.5	CAPR1_HUMAN	reviewed	Caprin-1 (Cell cycle-associated protein 1) (Cytoplasmic activation- and proliferation-associated protein 1) (GPI-anchored membrane protein 1) (GPI-anchored protein p137) (GPI-p137) (p137GPI) (Membrane component chromosome 11 surface marker 1) (RNA granule protein 105)	CAPRIN1 GPIAP1 GPIP137 M11S1 RNG105	Homo sapiens (Human)	709
HPV-31_L1	P67809	YBOX1	0.00632274	0.851189	0.0600426	0.303815	ME6.20,ME7.22,ME8.10,ME9.12	YBOX1_HUMAN	reviewed	Nuclease-sensitive element-binding protein 1 (CCAAT-binding transcription factor I subunit A) (CBF-A) (DNA-binding protein B) (DBPB) (Enhancer factor I subunit A) (EFI-A) (Y-box transcription factor) (Y-box-binding protein 1) (YB-1)	YBX1 NSEP1 YB1	Homo sapiens (Human)	324
HPV-31_L2	P62081	RS7	0.00292313	0.670296	0.141336	0.303711	ME7.20,ME8.7,ME9.7	RS7_HUMAN	reviewed	40S ribosomal protein S7	RPS7	Homo sapiens (Human)	194
HPV-31_L1	A6NKH3	RL37L	0.000785274	6.21335e-11	0.442849	0.303582	ME6.20	RL37L_HUMAN	reviewed	Putative 60S ribosomal protein L37a-like	RPL37L	Homo sapiens (Human)	93
HPV-31_E1	Q3ZCM7	TBB8	0.00440296	0.678388	0.13735	0.303484	ME6.22,ME8.11,ME9.10	TBB8_HUMAN	reviewed	Tubulin beta-8 chain	TUBB8	Homo sapiens (Human)	444
HPV-31_E7	P62714	PP2AB	0.00100286	0.582368	0.179969	0.303054	ME6.23,ME7.19,ME9.8	PP2AB_HUMAN	reviewed	Serine/threonine-protein phosphatase 2A catalytic subunit beta isoform (PP2A-beta) (EC 3.1.3.16)	PPP2CB	Homo sapiens (Human)	309
HPV-31_E2	P42677	RS27	0.00798457	0.763602	0.0981259	0.302908	ME5.20,ME6.19,ME7.21,ME9.9	RS27_HUMAN	reviewed	40S ribosomal protein S27 (Metallopan-stimulin 1) (MPS-1)	RPS27 MPS1	Homo sapiens (Human)	84
HPV-31_E5	P11498	PYC	0.00773177	0.851252	0.058581	0.302841	ME5.14,ME6.18,ME7.17,ME8.6,ME9.6	PYC_HUMAN	reviewed	Pyruvate carboxylase, mitochondrial (EC 6.4.1.1) (Pyruvic carboxylase) (PCB)	PC	Homo sapiens (Human)	1178
HPV-31_E6	P07900	HS90A	0.00130951	0.781713	0.0898877	0.302809	ME5.18,ME6.17,ME7.18,ME8.2	HS90A_HUMAN	reviewed	Heat shock protein HSP 90-alpha (Heat shock 86 kDa) (HSP 86) (HSP86) (Renal carcinoma antigen NY-REN-38)	HSP90AA1 HSP90A HSPC1 HSPCA	Homo sapiens (Human)	732
HPV-31_L1	P41743	KPCI	5.25472e-05	6.21335e-11	0.441591	0.302715	ME7.22	KPCI_HUMAN	reviewed	Protein kinase C iota type (EC 2.7.11.13) (Atypical protein kinase C-lambda/iota) (PRKC-lambda/iota) (aPKC-lambda/iota) (nPKC-iota)	PRKCI DXS1179E	Homo sapiens (Human)	596
HPV-31_L1	Q92615	LAR4B	4.45072e-05	6.21335e-11	0.441591	0.302715	ME7.22	LAR4B_HUMAN	reviewed	La-related protein 4B (La ribonucleoprotein domain family member 4B) (La ribonucleoprotein domain family member 5) (La-related protein 5)	LARP4B KIAA0217 LARP5	Homo sapiens (Human)	738
HPV-31_L2	P43307	SSRA	9.0286e-05	6.21335e-11	0.441442	0.302614	ME7.20	SSRA_HUMAN	reviewed	Translocon-associated protein subunit alpha (TRAP-alpha) (Signal sequence receptor subunit alpha) (SSR-alpha)	SSR1 TRAPA PSEC0262	Homo sapiens (Human)	286
HPV-31_L2	Q06787	FMR1	4.08869e-05	6.21335e-11	0.441442	0.302613	ME7.20	FMR1_HUMAN	reviewed	Fragile X mental retardation protein 1 (FMRP) (Protein FMR-1)	FMR1	Homo sapiens (Human)	632
HPV-31_E1	Q96EP5	DAZP1	0.00236021	0.84969	0.0588825	0.302533	ME5.21,ME7.23,ME8.11,ME9.10	DAZP1_HUMAN	reviewed	DAZ-associated protein 1 (Deleted in azoospermia-associated protein 1)	DAZAP1	Homo sapiens (Human)	407
HPV-31_E6	P31943	HNRH1	0.00184072	0.833812	0.0655732	0.302218	ME5.18,ME6.17,ME7.18,ME9.5	HNRH1_HUMAN	reviewed	Heterogeneous nuclear ribonucleoprotein H (hnRNP H) [Cleaved into: Heterogeneous nuclear ribonucleoprotein H, N-terminally processed]	HNRNPH1 HNRPH HNRPH1	Homo sapiens (Human)	449
HPV-31_E1^E4	Q02878	RL6	0.00208662	0.848383	0.0590002	0.302209	ME5.17,ME7.16,ME8.5,ME9.3	RL6_HUMAN	reviewed	60S ribosomal protein L6 (Neoplasm-related protein C140) (Tax-responsive enhancer element-binding protein 107) (TaxREB107)	RPL6 TXREB1	Homo sapiens (Human)	288
HPV-31_L2	O00743	PPP6	0.000350925	0.429745	0.247071	0.301961	ME6.21,ME7.20	PPP6_HUMAN	reviewed	Serine/threonine-protein phosphatase 6 catalytic subunit (PP6C) (EC 3.1.3.16)	PPP6C PPP6	Homo sapiens (Human)	305
HPV-31_E7	P08865	RSSA	0.00222772	0.726618	0.113358	0.301905	ME5.19,ME6.23,ME7.19,ME9.8	RSSA_HUMAN	reviewed	40S ribosomal protein SA (37 kDa laminin receptor precursor) (37LRP) (37/67 kDa laminin receptor) (LRP/LR) (67 kDa laminin receptor) (67LR) (Colon carcinoma laminin-binding protein) (Laminin receptor 1) (LamR) (Laminin-binding protein precursor p40) (LBP/p40) (Multidrug resistance-associated protein MGr1-Ag) (NEM/1CHD4)	RPSA LAMBR LAMR1	Homo sapiens (Human)	295
HPV-31_E7	P25705	ATPA	0.00161459	0.641664	0.151344	0.30173	ME6.23,ME7.19,ME9.8	ATPA_HUMAN	reviewed	ATP synthase subunit alpha, mitochondrial	ATP5A1 ATP5A ATP5AL2 ATPM	Homo sapiens (Human)	553
HPV-31_E6	P26373	RL13	0.00287717	0.848288	0.0582609	0.301678	ME5.18,ME7.18,ME8.2,ME9.5	RL13_HUMAN	reviewed	60S ribosomal protein L13 (Breast basic conserved protein 1)	RPL13 BBC1 OK/SW-cl.46	Homo sapiens (Human)	211
HPV-31_E6	P36578	RL4	0.00570312	0.812937	0.0737445	0.301402	ME5.18,ME7.18,ME8.2,ME9.5	RL4_HUMAN	reviewed	60S ribosomal protein L4 (60S ribosomal protein L1)	RPL4 RPL1	Homo sapiens (Human)	427
HPV-31_E5	P62857	RS28	0.0189868	0.694897	0.126598	0.301294	ME5.14,ME6.18,ME7.17,ME8.6	RS28_HUMAN	reviewed	40S ribosomal protein S28	RPS28	Homo sapiens (Human)	69
HPV-31_E8^E2C	Q86V81	THOC4	0.00175864	0.675954	0.134734	0.300924	ME5.15,ME7.15,ME9.2	THOC4_HUMAN	reviewed	THO complex subunit 4 (Tho4) (Ally of AML-1 and LEF-1) (Aly/REF export factor) (Transcriptional coactivator Aly/REF) (bZIP-enhancing factor BEF)	ALYREF ALY BEF THOC4	Homo sapiens (Human)	257
HPV-31_E8^E2C	P62280	RS11	0.0041359	0.681535	0.1321	0.300854	ME7.15,ME8.4,ME9.2	RS11_HUMAN	reviewed	40S ribosomal protein S11	RPS11	Homo sapiens (Human)	158
HPV-31_E6	P16615	AT2A2	0.00025499	0.361676	0.276054	0.300827	ME5.18,ME7.18	AT2A2_HUMAN	reviewed	Sarcoplasmic/endoplasmic reticulum calcium ATPase 2 (SERCA2) (SR Ca(2+)-ATPase 2) (EC 3.6.3.8) (Calcium pump 2) (Calcium-transporting ATPase sarcoplasmic reticulum type, slow twitch skeletal muscle isoform) (Endoplasmic reticulum class 1/2 Ca(2+) ATPase)	ATP2A2 ATP2B	Homo sapiens (Human)	1042
HPV-31_E5	P62913	RL11	0.00381487	0.81346	0.0725204	0.300713	ME6.18,ME7.17,ME8.6,ME9.6	RL11_HUMAN	reviewed	60S ribosomal protein L11 (CLL-associated antigen KW-12)	RPL11	Homo sapiens (Human)	178
HPV-31_E1^E4	Q6P161	RM54	0.00342254	0.623507	0.157997	0.3007	ME6.16,ME7.16,ME8.5	RM54_HUMAN	reviewed	39S ribosomal protein L54, mitochondrial (L54mt) (MRP-L54)	MRPL54	Homo sapiens (Human)	138
HPV-31_E6	P05388	RLA0	0.0022915	0.837556	0.060949	0.300206	ME5.18,ME6.17,ME7.18,ME9.5	RLA0_HUMAN	reviewed	60S acidic ribosomal protein P0 (60S ribosomal protein L10E)	RPLP0	Homo sapiens (Human)	317
HPV-31_E6	P10809	CH60	0.00212467	0.641933	0.148657	0.299974	ME5.18,ME6.17,ME7.18	CH60_HUMAN	reviewed	60 kDa heat shock protein, mitochondrial (60 kDa chaperonin) (Chaperonin 60) (CPN60) (Heat shock protein 60) (HSP-60) (Hsp60) (HuCHA60) (Mitochondrial matrix protein P1) (P60 lymphocyte protein)	HSPD1 HSP60	Homo sapiens (Human)	573
[truncated: 2,378 more rows]

## Sheet: C33A high confidence PPIs
Bait	Prey	name	Abundance	Reproducibility	Specificity	MiST	Sample ID	Entry.name	Status	Protein.names	Gene.names	Organism	Length
[truncated: 137 more rows]

[truncated: 4 more sheets: HEK293, HEK293 high confidence PPIs, Het-1A, Het-1A high confidence PPIs]
