# Supplementary material for: Multiple Routes to Oncogenesis Are Promoted by the Human Papillomavirus–Host Protein Network
Source: Oxford University Press journal article supplement (doi:10.1158/2159-8290.cd-17-1018), 2018-09-12
Supplement: 21598290cd171018-sup-189143_3_supp_4844079_pbp08m.xlsx [file 21598290cd171018-sup-189143_3_supp_4844079_pbp08m.xlsx]

## Sheet: Sheet1
Supplemental Table S4. Differentially Mutated Genes in HPV(–) vs. HPV(+) Samples. Related to Figure 3.
Gene	Deviance	p-value	FDR	Coefficient	Mutation rate in HPV(+)	Mutation rate in HPV(-)	Mutation rate in our cohort	Activating / Inactivating mutations
TP53	230.845	3.8995e-52	5.42226e-48	3.59688	0.0644068	0.813492	0.536921	Inactivating
CDKN2A	121.849	2.49115e-28	1.73197e-24	3.2776	0.0237288	0.559524	0.361702	Inactivating
CDKN2B	38.9393	4.37192e-10	2.02639e-06	2.56037	0.0135593	0.271825	0.176471	Inactivating
C9orf53	36.8051	1.30547e-09	4.53815e-06	2.41629	0.0163265	0.332569	0.218796	Inactivating
CCND1	24.9367	5.9243e-07	0.00164755	1.70306	0.0338983	0.244048	0.166458	activating
FAT1	24.729	6.59844e-07	0.00152919	1.33471	0.0949153	0.305556	0.227785	Inactivating
NOTCH2	23.1693	1.48345e-06	0.00294677	2.75835	0.0135593	0.0873016	0.0600751	Inactivating
EGFR	16.243	5.57156e-05	0.0968407	1.73332	0.0271186	0.140873	0.0988736	activating
KLHL9	15.2894	9.22346e-05	0.142503	3.49828	0.00408163	0.0848624	0.0558003	Inactivating
USH2A	15.2173	9.58228e-05	0.133242	1.35819	0.0677966	0.154762	0.122653	Inactivating
MTAP	13.9841	0.000184361	0.233049	1.45432	0.0244898	0.231651	0.157122	Inactivating
IFNA5	13.9102	0.000191758	0.2222	3.4585	0.00408163	0.0756881	0.0499266	Inactivating
EBF2	13.5814	0.000228433	0.244335	3.9546	0.00408163	0.0389908	0.0264317	Inactivating
CHD8	13.5534	0.00023187	0.230297	2.74573	0.0244898	0.0481651	0.0396476	Inactivating
IFNA4	13.2259	0.0002761	0.255945	3.43795	0.00408163	0.0711009	0.0469897	Inactivating
CSMD1	12.918	0.000325436	0.282825	1.09766	0.0938776	0.302752	0.227606	Inactivating
SLITRK2	12.8168	0.000343517	0.280977	3.30765	0.00816327	0.0458716	0.0323054	Inactivating
CRTC1	12.6912	0.000367385	0.283805	3.73004	0.00816327	0.00917431	0.00881057	Inactivating
IFNA10	12.5453	0.000397207	0.290692	3.41693	0.00408163	0.0665138	0.0440529	Inactivating
XIRP2	12.4243	0.000423776	0.29463	1.66428	0.0489796	0.137615	0.105727	Inactivating
HMBOX1	12.2465	0.000466135	0.308648	3.93144	0.00408163	0.0298165	0.020558	Inactivating
DNAH8	11.9474	0.000547241	0.345881	2.05105	0.0285714	0.0963303	0.071953	Inactivating
MAST3	11.5782	0.0006673	0.403426	3.05898	0.0163265	0.0206422	0.0190896	Inactivating
GRIN2B	10.8591	0.000983089	0.569577	3.362	0.00408163	0.0550459	0.0367107	Inactivating
KIF21A	10.8472	0.000989431	0.550322	3.26326	0.00816327	0.0321101	0.0234949	Inactivating
IFNE	10.7677	0.00103286	0.552381	2.77004	0.00408163	0.0848624	0.0558003	Inactivating
XPC	10.6774	0.00108451	0.558521	2.08756	0.0101695	0.0357143	0.0262829	Inactivating
CFTR	10.6194	0.00111905	0.555727	2.90263	0.0122449	0.0389908	0.0293686	Inactivating
PURG	10.6194	0.00111905	0.536564	2.90263	0.0122449	0.0389908	0.0293686	Inactivating
RNMT	10.5948	0.00113403	0.525624	3.90183	0.00408163	0.0183486	0.0132159	Inactivating
SLFN5	10.5948	0.00113403	0.508669	3.90183	0.00408163	0.0183486	0.0132159	Inactivating
STRADA	10.5948	0.00113403	0.508669	3.90183	0.00408163	0.0183486	0.0132159	Inactivating
FAM47C	10.3014	0.00132929	0.560114	2.06806	0.0244898	0.0802752	0.0602056	Inactivating
LIG1	10.2668	0.00135448	0.553943	3.89582	0.00408163	0.016055	0.0117474	Inactivating
IFNA8	10.2028	0.00140231	0.557119	2.35892	0.00816327	0.087156	0.0587372	Inactivating
NCAM2	10.0056	0.00156064	0.602795	2.64566	0.0163265	0.0412844	0.0323054	Inactivating
DCC	9.873	0.00167721	0.630315	1.6297	0.0338983	0.0853175	0.0663329	Inactivating
KCNJ14	9.61282	0.00193224	0.707047	3.88369	0.00408163	0.0114679	0.00881057	Inactivating
CCT6B	9.61282	0.00193224	0.688917	3.88369	0.00408163	0.0114679	0.00881057	Inactivating
ARHGEF2	9.61282	0.00193224	0.671694	3.88369	0.00408163	0.0114679	0.00881057	Inactivating
DAAM1	9.55014	0.00199935	0.678071	3.23225	0.00816327	0.0229358	0.0176211	Inactivating
SERPINB7	9.52612	0.00202568	0.670643	3.31526	0.00408163	0.0458716	0.030837	Inactivating
CASP8	9.51439	0.00203867	0.659248	1.16205	0.0542373	0.132937	0.10388	Inactivating
B3GNT5	9.28695	0.00230792	0.729355	3.87757	0.00408163	0.00917431	0.00734214	Inactivating
ATP13A1	9.28695	0.00230792	0.713147	3.87757	0.00408163	0.00917431	0.00734214	Inactivating
PLVAP	9.28695	0.00230792	0.697644	3.87757	0.00408163	0.00917431	0.00734214	Inactivating
CNTNAP5	9.28378	0.00231191	0.683982	2.26678	0.0163265	0.0642202	0.0469897	Inactivating
NCKAP5	9.25018	0.00235472	0.682133	1.52469	0.0204082	0.135321	0.0939794	Inactivating
WDR62	9.22784	0.00238363	0.676416	3.2243	0.00816327	0.0206422	0.0161527	Inactivating
SLC5A5	9.22784	0.00238363	0.662888	3.2243	0.00816327	0.0206422	0.0161527	Inactivating
MYO5B	9.19507	0.00242668	0.661627	3.30313	0.00408163	0.043578	0.0293686	Inactivating
PRDM9	9.14945	0.00248793	0.665281	1.87481	0.0169492	0.0714286	0.0513141	Inactivating
NOTCH1	9.1133	0.00253758	0.665757	0.875435	0.0745763	0.204365	0.156446	Inactivating
MAGEL2	9.06143	0.00261057	0.672223	2.615	0.0163265	0.0344037	0.0279001	Inactivating
SPTA1	9.01427	0.0026788	0.67725	1.42438	0.0305085	0.0793651	0.0613267	Inactivating
SGSM3	8.96182	0.00275681	0.684525	3.87142	0.00408163	0.00688073	0.00587372	Inactivating
ARMC6	8.90632	0.00284185	0.693262	3.21626	0.00816327	0.0183486	0.0146843	Inactivating
DPYSL2	8.8649	0.00290707	0.696944	3.2908	0.00408163	0.0412844	0.0279001	Inactivating
IFNA17	8.78845	0.00303144	0.714443	2.64538	0.00408163	0.0711009	0.0469897	Inactivating
PGM5	8.72642	0.00313632	0.726842	2.43214	0.0122449	0.0550459	0.0396476	Inactivating
DNMT3A	8.70528	0.0031729	0.723266	2.84739	0.0101695	0.0218254	0.0175219	activating
LPO	8.63741	0.00329329	0.7386	3.86523	0.00408163	0.00458716	0.00440529	Inactivating
PARD3	8.63057	0.00330568	0.729611	1.90335	0.0285714	0.0711009	0.0558003	Inactivating
ZNF626	8.5856	0.00338833	0.736167	3.20814	0.00816327	0.016055	0.0132159	Inactivating
DSEL	8.5439	0.00346682	0.741634	1.83043	0.0204082	0.087156	0.0631424	Inactivating
IKBKB	8.53561	0.00348265	0.733731	3.27827	0.00408163	0.0389908	0.0264317	Inactivating
MLLT3	8.53561	0.00348265	0.72278	3.27827	0.00408163	0.0389908	0.0264317	Inactivating
PLXNB2	8.3399	0.00387837	0.79307	2.15597	0.0285714	0.043578	0.0381791	Inactivating
SLC25A42	8.26565	0.00404022	0.814192	3.19992	0.00816327	0.0137615	0.0117474	Inactivating
CCDC74A	8.26565	0.00404022	0.80256	3.19992	0.00816327	0.0137615	0.0117474	Inactivating
CSMD3	8.26079	0.00405105	0.793378	0.773927	0.0847458	0.232143	0.177722	Inactivating
RBBP7	8.2072	0.00417245	0.805805	3.26553	0.00408163	0.0366972	0.0249633	Inactivating
INTS3	8.04142	0.00457198	0.870868	3.19997	0.00677966	0.00595238	0.00625782	Inactivating
CD1E	7.87967	0.00499935	0.939405	3.25256	0.00408163	0.0344037	0.0234949	Inactivating
PPP2CB	7.87967	0.00499935	0.92688	3.25256	0.00408163	0.0344037	0.0234949	Inactivating
ZNF697	7.87967	0.00499935	0.914684	3.25256	0.00408163	0.0344037	0.0234949	Inactivating
SCARA5	7.87967	0.00499935	0.902805	3.25256	0.00408163	0.0344037	0.0234949	Inactivating
FAM69C	7.81651	0.0051771	0.922918	2.57545	0.00408163	0.0642202	0.0425844	Inactivating
IFNA21	7.81651	0.0051771	0.911235	2.57545	0.00408163	0.0642202	0.0425844	Inactivating
FBXO15	7.81651	0.0051771	0.899845	2.57545	0.00408163	0.0642202	0.0425844	Inactivating
PAPPA2	7.81576	0.00517926	0.889106	1.58414	0.0204082	0.103211	0.0734214	Inactivating
CACNA1I	7.70514	0.00550637	0.933733	2.38473	0.0204082	0.0298165	0.0264317	Inactivating
PNMA2	7.67127	0.0056107	0.939961	2.67775	0.00816327	0.0412844	0.0293686	Inactivating
PTK2B	7.61284	0.00579542	0.959349	1.82328	0.0169492	0.0436508	0.0337922	Inactivating
CRB1	7.60662	0.00581543	0.951337	1.93545	0.0244898	0.059633	0.0469897	Inactivating
WRN	7.56042	0.00596641	0.964686	2.03379	0.0101695	0.0456349	0.0325407	Inactivating
SCARA3	7.55303	0.00599092	0.957514	3.23935	0.00408163	0.0321101	0.0220264	Inactivating
CLU	7.55303	0.00599092	0.946634	3.23935	0.00408163	0.0321101	0.0220264	Inactivating
RBP3	7.55303	0.00599092	0.946634	3.23935	0.00408163	0.0321101	0.0220264	Inactivating
CCDC25	7.55303	0.00599092	0.925597	3.23935	0.00408163	0.0321101	0.0220264	Inactivating
EFCAB6	7.39347	0.00654612	1.00026	2.2087	0.0135593	0.0257937	0.0212766	Inactivating
IL1RAPL1	7.33	0.00678129	1.02493	1.40066	0.0204082	0.119266	0.0837004	Inactivating
FBXO16	7.22728	0.00718041	1.07359	3.22589	0.00408163	0.0298165	0.020558	Inactivating
SLCO1C1	7.22728	0.00718041	1.06217	3.22589	0.00408163	0.0298165	0.020558	Inactivating
DUSP26	7.22728	0.00718041	1.05098	3.22589	0.00408163	0.0298165	0.020558	Inactivating
PIAS3	7.22728	0.00718041	1.04004	3.22589	0.00408163	0.0298165	0.020558	Inactivating
INTS9	7.22728	0.00718041	1.02932	3.22589	0.00408163	0.0298165	0.020558	Inactivating
TTBK1	7.19795	0.00729868	1.03559	2.54882	0.0163265	0.0206422	0.0190896	Inactivating
PLXNC1	7.19795	0.00729868	1.02513	2.54882	0.0163265	0.0206422	0.0190896	Inactivating
NLGN4X	7.14206	0.00752965	1.047	2.15797	0.0163265	0.0481651	0.0367107	Inactivating
KANK1	7.14206	0.00752965	1.03663	2.15797	0.0163265	0.0481651	0.0367107	Inactivating
OLFM2	7.13356	0.00756546	1.03135	2.79755	0.0122449	0.0137615	0.0132159	Inactivating
DSCAM	7.09504	0.00772977	1.04352	1.32203	0.0271186	0.0753968	0.057572	Inactivating
NLRP5	7.03817	0.00797904	1.06681	2.64678	0.00816327	0.0366972	0.0264317	Inactivating
LRP1B	6.98888	0.00820178	1.08615	0.676335	0.132203	0.27381	0.221527	Inactivating
DUSP4	6.90241	0.00860797	1.12919	3.21218	0.00408163	0.0275229	0.0190896	Inactivating
DDX20	6.90241	0.00860797	1.11863	3.21218	0.00408163	0.0275229	0.0190896	Inactivating
BNIP3L	6.90241	0.00860797	1.10828	3.21218	0.00408163	0.0275229	0.0190896	Inactivating
NUGGC	6.90241	0.00860797	1.10828	3.21218	0.00408163	0.0275229	0.0190896	Inactivating
PBK	6.90241	0.00860797	1.10828	3.21218	0.00408163	0.0275229	0.0190896	Inactivating
PNOC	6.90241	0.00860797	1.10828	3.21218	0.00408163	0.0275229	0.0190896	Inactivating
GTF2E2	6.90241	0.00860797	1.0687	3.21218	0.00408163	0.0275229	0.0190896	Inactivating
LEPROTL1	6.90241	0.00860797	1.0687	3.21218	0.00408163	0.0275229	0.0190896	Inactivating
MBOAT4	6.90241	0.00860797	1.0687	3.21218	0.00408163	0.0275229	0.0190896	Inactivating
SMIM18	6.90241	0.00860797	1.0687	3.21218	0.00408163	0.0275229	0.0190896	Inactivating
SACS	6.89268	0.00865493	1.03747	1.80724	0.0285714	0.0573394	0.0469897	Inactivating
ADRA1A	6.86319	0.00879894	1.04572	2.33749	0.0122449	0.0412844	0.030837	Inactivating
CHD4	6.85595	0.00883465	1.04107	2.08859	0.0285714	0.0321101	0.030837	Inactivating
CNDP1	6.85199	0.00885427	1.03461	1.94554	0.00408163	0.0825688	0.0543319	Inactivating
EPB41	6.82178	0.0090053	1.04349	2.78709	0.0122449	0.0114679	0.0117474	Inactivating
FOXRED2	6.82178	0.0090053	1.03487	2.78709	0.0122449	0.0114679	0.0117474	Inactivating
RFX3	6.72322	0.00951657	1.08465	2.6307	0.00816327	0.0344037	0.0249633	Inactivating
POTEC	6.72322	0.00951657	1.07584	2.6307	0.00816327	0.0344037	0.0249633	Inactivating
TRIM35	6.72322	0.00951657	1.06716	2.6307	0.00816327	0.0344037	0.0249633	Inactivating
PCLO	6.59137	0.0102474	1.13992	0.841946	0.0644068	0.164683	0.12766	Inactivating
SI	6.5856	0.0102807	1.13455	0.98092	0.0508475	0.113095	0.0901126	Inactivating
OR2AK2	6.57843	0.0103222	1.13016	3.19818	0.00408163	0.0252294	0.0176211	Inactivating
SNRNP200	6.57843	0.0103222	1.12133	3.19818	0.00408163	0.0252294	0.0176211	Inactivating
ZNF804B	6.56937	0.0103749	1.11831	1.28048	0.0271186	0.0753968	0.057572	Inactivating
BCL9	6.55684	0.0104482	1.11755	2.32023	0.0122449	0.0389908	0.0293686	Inactivating
LRRC1	6.51085	0.0107218	1.13807	2.77645	0.0122449	0.00917431	0.010279	Inactivating
2017-09-03	6.51085	0.0107218	1.12944	2.77645	0.0122449	0.00917431	0.010279	Inactivating
TRIM17	6.51085	0.0107218	1.12095	2.77645	0.0122449	0.00917431	0.010279	Inactivating
DOK6	6.45108	0.0110885	1.15064	1.50343	0.0169492	0.0674603	0.048811	Inactivating
CUL3	6.44818	0.0111066	1.14398	1.18985	0.0305085	0.0714286	0.0563204	Inactivating
FAT4	6.41937	0.0112882	1.15414	1.16739	0.040678	0.0892857	0.0713392	Inactivating
PCDHA10	6.40934	0.0113521	1.1522	2.6142	0.00816327	0.0321101	0.0234949	Inactivating
DMRTA1	6.33958	0.0118073	1.18971	1.48558	0.00816327	0.103211	0.0690162	Inactivating
PARD6G	6.25587	0.0123782	1.23827	1.88328	0.00408163	0.0779817	0.051395	Inactivating
POLR3C	6.25534	0.0123819	1.22979	3.18389	0.00408163	0.0229358	0.0161527	Inactivating
HIST1H1C	6.25534	0.0123819	1.22107	3.18389	0.00408163	0.0229358	0.0161527	Inactivating
RNF122	6.25534	0.0123819	1.21247	3.18389	0.00408163	0.0229358	0.0161527	Inactivating
GLI2	6.25175	0.0124071	1.20644	2.30246	0.0122449	0.0366972	0.0279001	Inactivating
CBWD3	6.25175	0.0124071	1.19806	2.30246	0.0122449	0.0366972	0.0279001	Inactivating
KIF13B	6.25175	0.0124071	1.1898	2.30246	0.0122449	0.0366972	0.0279001	Inactivating
CPLX4	6.22529	0.0125938	1.19943	2.44348	0.00408163	0.0527523	0.0352423	Inactivating
CD226	6.22286	0.0126111	1.19291	1.8984	0.0122449	0.0619266	0.0440529	Inactivating
WNT7B	6.20079	0.0127693	1.19971	2.76561	0.0122449	0.00688073	0.00881057	Inactivating
PKHD1L1	6.1456	0.013174	1.22942	0.878145	0.0542373	0.126984	0.100125	Inactivating
ATP12A	6.09656	0.0135445	1.25558	2.59723	0.00816327	0.0298165	0.0220264	Inactivating
IFT88	6.09656	0.0135445	1.24726	2.59723	0.00816327	0.0298165	0.0220264	Inactivating
EXTL3	6.09656	0.0135445	1.23906	2.59723	0.00816327	0.0298165	0.0220264	Inactivating
TMEM132E	6.09656	0.0135445	1.23906	2.59723	0.00816327	0.0298165	0.0220264	Inactivating
DOCK9	6.09656	0.0135445	1.22297	2.59723	0.00816327	0.0298165	0.0220264	Inactivating
ROBO2	6.08592	0.0136264	1.22242	1.39765	0.0408163	0.0802752	0.0660793	Inactivating
LMF2	5.97441	0.0145149	1.29378	2.50023	0.0163265	0.0114679	0.0132159	Inactivating
ENPEP	5.94792	0.0147346	1.305	2.28414	0.0122449	0.0344037	0.0264317	Inactivating
CHL1	5.94705	0.014742	1.29739	2.08616	0.0163265	0.0389908	0.030837	Inactivating
GYS2	5.93315	0.0148586	1.29943	3.16929	0.00408163	0.0206422	0.0146843	Inactivating
GMIP	5.93315	0.0148586	1.29131	3.16929	0.00408163	0.0206422	0.0146843	Inactivating
SLC12A6	5.93315	0.0148586	1.28329	3.16929	0.00408163	0.0206422	0.0146843	Inactivating
GZMK	5.93315	0.0148586	1.27537	3.16929	0.00408163	0.0206422	0.0146843	Inactivating
PSME4	5.93315	0.0148586	1.27537	3.16929	0.00408163	0.0206422	0.0146843	Inactivating
GPR78	5.93315	0.0148586	1.25981	3.16929	0.00408163	0.0206422	0.0146843	Inactivating
TTI2	5.93315	0.0148586	1.25218	3.16929	0.00408163	0.0206422	0.0146843	Inactivating
BRF2	5.93315	0.0148586	1.24463	3.16929	0.00408163	0.0206422	0.0146843	Inactivating
SERPINB8	5.9117	0.0150407	1.25234	2.41419	0.00408163	0.0504587	0.0337739	Inactivating
PIGN	5.9117	0.0150407	1.24488	2.41419	0.00408163	0.0504587	0.0337739	Inactivating
KDSR	5.9117	0.0150407	1.23752	2.41419	0.00408163	0.0504587	0.0337739	Inactivating
COMP	5.8916	0.0152133	1.24436	2.75457	0.0122449	0.00458716	0.00734214	Inactivating
GSR	5.78488	0.0161646	1.31444	2.57978	0.00816327	0.0275229	0.020558	Inactivating
ZNF518B	5.78488	0.0161646	1.30679	2.57978	0.00816327	0.0275229	0.020558	Inactivating
AMY2B	5.78488	0.0161646	1.29924	2.57978	0.00816327	0.0275229	0.020558	Inactivating
FUT10	5.78488	0.0161646	1.29177	2.57978	0.00816327	0.0275229	0.020558	Inactivating
BAZ1B	5.77342	0.0162703	1.29279	2.29462	0.0101695	0.0198413	0.0162703	Inactivating
ANKRD20A4	5.65183	0.0174372	1.37764	2.06678	0.0163265	0.0366972	0.0293686	Inactivating
TUBA3C	5.65183	0.0174372	1.36985	2.06678	0.0163265	0.0366972	0.0293686	Inactivating
MOV10	5.6454	0.0175013	1.36716	2.26523	0.0122449	0.0321101	0.0249633	Inactivating
IQCH	5.6454	0.0175013	1.35953	2.26523	0.0122449	0.0321101	0.0249633	Inactivating
LARGE	5.6454	0.0175013	1.35953	2.26523	0.0122449	0.0321101	0.0249633	Inactivating
TMEM66	5.6454	0.0175013	1.3445	2.26523	0.0122449	0.0321101	0.0249633	Inactivating
ARHGAP30	5.61186	0.0178393	1.36294	3.15436	0.00408163	0.0183486	0.0132159	Inactivating
STK31	5.61186	0.0178393	1.36294	3.15436	0.00408163	0.0183486	0.0132159	Inactivating
OR6K2	5.61186	0.0178393	1.34813	3.15436	0.00408163	0.0183486	0.0132159	Inactivating
DACH2	5.61186	0.0178393	1.34084	3.15436	0.00408163	0.0183486	0.0132159	Inactivating
HIST1H4F	5.61186	0.0178393	1.33363	3.15436	0.00408163	0.0183486	0.0132159	Inactivating
LILRB4	5.61186	0.0178393	1.3265	3.15436	0.00408163	0.0183486	0.0132159	Inactivating
SAMD9	5.61186	0.0178393	1.31945	3.15436	0.00408163	0.0183486	0.0132159	Inactivating
CPSF1	5.61155	0.0178425	1.3127	2.14406	0.0244898	0.0183486	0.020558	Inactivating
RAX	5.59977	0.0179629	1.3146	2.38373	0.00408163	0.0481651	0.0323054	Inactivating
ELAC1	5.59977	0.0179629	1.30772	2.38373	0.00408163	0.0481651	0.0323054	Inactivating
MGAM	5.57422	0.0182268	1.32002	1.3598	0.0408163	0.0756881	0.0631424	Inactivating
TNRC18	5.52894	0.0187044	1.34759	1.92009	0.0326531	0.0252294	0.0279001	Inactivating
FAM47B	5.50804	0.0189293	1.35676	1.7124	0.0163265	0.059633	0.0440529	Inactivating
KIAA0947	5.48825	0.0191446	1.36516	1.7145	0.0285714	0.0458716	0.0396476	Inactivating
KAL1	5.47433	0.0192978	1.36906	2.56179	0.00816327	0.0252294	0.0190896	Inactivating
VWA3B	5.47433	0.0192978	1.36211	2.56179	0.00816327	0.0252294	0.0190896	Inactivating
ADAMTSL3	5.47433	0.0192978	1.35523	2.56179	0.00816327	0.0252294	0.0190896	Inactivating
TRIM42	5.47433	0.0192978	1.34842	2.56179	0.00816327	0.0252294	0.0190896	Inactivating
SLC4A3	5.47159	0.0193281	1.34378	1.57828	0.020339	0.0396825	0.0325407	Inactivating
AHCTF1	5.45063	0.0195613	1.35323	1.9096	0.0204082	0.0389908	0.0323054	Inactivating
SEC16A	5.45063	0.0195613	1.34653	1.9096	0.0204082	0.0389908	0.0323054	Inactivating
FAT2	5.43382	0.0197504	1.35285	0.961452	0.0508475	0.0873016	0.0738423	Inactivating
HCN1	5.42049	0.0199018	1.35654	1.61189	0.0204082	0.0619266	0.0469897	Inactivating
ADNP2	5.38077	0.0203599	1.381	1.78331	0.00408163	0.0711009	0.0469897	Inactivating
KCNG2	5.38077	0.0203599	1.3743	1.78331	0.00408163	0.0711009	0.0469897	Inactivating
CHKB	5.36842	0.0205046	1.37737	2.47427	0.0163265	0.00688073	0.010279	Inactivating
MPHOSPH8	5.35809	0.0206263	1.37889	2.04673	0.0163265	0.0344037	0.0279001	Inactivating
NEDD4L	5.35529	0.0206595	1.3745	1.82427	0.0122449	0.0550459	0.0396476	Inactivating
PPP2R2A	5.34419	0.0207914	1.37669	2.24568	0.0122449	0.0298165	0.0234949	Inactivating
NRG1	5.34419	0.0207914	1.37016	2.24568	0.0122449	0.0298165	0.0234949	Inactivating
NPY1R	5.34419	0.0207914	1.3637	2.24568	0.0122449	0.0298165	0.0234949	Inactivating
XRCC6	5.32271	0.0210492	1.37413	2.57609	0.00677966	0.0119048	0.0100125	Inactivating
DNAH17	5.3105	0.0211972	1.37732	1.78945	0.0244898	0.0412844	0.0352423	Inactivating
CYB5R3	5.29147	0.0214301	1.38598	3.13908	0.00408163	0.016055	0.0117474	Inactivating
ZNF681	5.29147	0.0214301	1.37956	3.13908	0.00408163	0.016055	0.0117474	Inactivating
PLCXD3	5.29147	0.0214301	1.37321	3.13908	0.00408163	0.016055	0.0117474	Inactivating
SLC26A9	5.29147	0.0214301	1.37321	3.13908	0.00408163	0.016055	0.0117474	Inactivating
KCNA1	5.29147	0.0214301	1.36067	3.13908	0.00408163	0.016055	0.0117474	Inactivating
KIAA0368	5.29147	0.0214301	1.36067	3.13908	0.00408163	0.016055	0.0117474	Inactivating
ZP4	5.29147	0.0214301	1.34835	3.13908	0.00408163	0.016055	0.0117474	Inactivating
VPS4B	5.28957	0.0214536	1.34375	2.35199	0.00408163	0.0458716	0.030837	Inactivating
GRP	5.28957	0.0214536	1.33772	2.35199	0.00408163	0.0458716	0.030837	Inactivating
KEAP1	5.26021	0.0218184	1.3544	2.00195	0.00816327	0.0504587	0.0352423	Inactivating
PTPRC	5.21265	0.0224231	1.38575	1.69415	0.0285714	0.043578	0.0381791	Inactivating
SKA3	5.16491	0.0230477	1.41804	2.54323	0.00816327	0.0229358	0.0176211	Inactivating
GJA3	5.16491	0.0230477	1.4118	2.54323	0.00816327	0.0229358	0.0176211	Inactivating
ZKSCAN5	5.16491	0.0230477	1.4056	2.54323	0.00816327	0.0229358	0.0176211	Inactivating
HIST1H2BG	5.16491	0.0230477	1.39947	2.54323	0.00816327	0.0229358	0.0176211	Inactivating
MYO18A	5.16491	0.0230477	1.39338	2.54323	0.00816327	0.0229358	0.0176211	Inactivating
SPANXN2	5.16491	0.0230477	1.38735	2.54323	0.00816327	0.0229358	0.0176211	Inactivating
PLAT	5.16491	0.0230477	1.38137	2.54323	0.00816327	0.0229358	0.0176211	Inactivating
PCDH11X	5.12761	0.0235481	1.4053	1.32634	0.0244898	0.0825688	0.061674	Inactivating
CDH7	5.12761	0.0235481	1.3993	1.32634	0.0244898	0.0825688	0.061674	Inactivating
ADAM28	5.07026	0.0243398	1.44019	1.79773	0.0122449	0.0527523	0.0381791	Inactivating
ZFP42	5.07025	0.0243399	1.43409	1.44963	0.0285714	0.0642202	0.051395	Inactivating
GPR64	5.06589	0.0244012	1.43164	2.02595	0.0163265	0.0321101	0.0264317	Inactivating
SON	5.04435	0.0247063	1.44345	2.22544	0.0122449	0.0275229	0.0220264	Inactivating
FUT9	5.04435	0.0247063	1.43741	2.22544	0.0122449	0.0275229	0.0220264	Inactivating
STMN4	5.04435	0.0247063	1.43142	2.22544	0.0122449	0.0275229	0.0220264	Inactivating
HRAS	5.02926	0.0249226	1.43796	1.336	0.0101695	0.0615079	0.0425532	activating
CTDP1	4.98368	0.0255875	1.47023	1.58731	0.00816327	0.0711009	0.0484581	Inactivating
HMSD	4.98117	0.0256247	1.4663	2.31883	0.00408163	0.043578	0.0293686	Inactivating
POLI	4.98117	0.0256247	1.46029	2.31883	0.00408163	0.043578	0.0293686	Inactivating
SERPINB5	4.98117	0.0256247	1.46029	2.31883	0.00408163	0.043578	0.0293686	Inactivating
TGIF1	4.97199	0.025761	1.45613	3.12343	0.00408163	0.0137615	0.010279	Inactivating
OTOF	4.97199	0.025761	1.45023	3.12343	0.00408163	0.0137615	0.010279	Inactivating
ZNF675	4.97199	0.025761	1.44438	3.12343	0.00408163	0.0137615	0.010279	Inactivating
ZNF829	4.97199	0.025761	1.44438	3.12343	0.00408163	0.0137615	0.010279	Inactivating
KRT86	4.97199	0.025761	1.43283	3.12343	0.00408163	0.0137615	0.010279	Inactivating
OR4K13	4.97199	0.025761	1.43283	3.12343	0.00408163	0.0137615	0.010279	Inactivating
TECPR1	4.97199	0.025761	1.42146	3.12343	0.00408163	0.0137615	0.010279	Inactivating
ZHX1	4.97199	0.025761	1.42146	3.12343	0.00408163	0.0137615	0.010279	Inactivating
DNAJB7	4.97199	0.025761	1.41026	3.12343	0.00408163	0.0137615	0.010279	Inactivating
TTC29	4.97199	0.025761	1.41026	3.12343	0.00408163	0.0137615	0.010279	Inactivating
ALG1	4.97199	0.025761	1.39925	3.12343	0.00408163	0.0137615	0.010279	Inactivating
SREBF2	4.97199	0.025761	1.39925	3.12343	0.00408163	0.0137615	0.010279	Inactivating
ZNF708	4.97199	0.025761	1.3884	3.12343	0.00408163	0.0137615	0.010279	Inactivating
SLC46A3	4.97199	0.025761	1.38304	3.12343	0.00408163	0.0137615	0.010279	Inactivating
DDX21	4.97199	0.025761	1.37772	3.12343	0.00408163	0.0137615	0.010279	Inactivating
PPM1D	4.97199	0.025761	1.37244	3.12343	0.00408163	0.0137615	0.010279	Inactivating
RBM17	4.97199	0.025761	1.3672	3.12343	0.00408163	0.0137615	0.010279	Inactivating
OR10G2	4.97199	0.025761	1.362	3.12343	0.00408163	0.0137615	0.010279	Inactivating
NEK5	4.9596	0.0259462	1.3666	1.60064	0.0169492	0.0376984	0.0300375	Inactivating
MYC	4.92222	0.0265135	1.39121	0.88273	0.0542373	0.119048	0.0951189	activating
ELAVL2	4.92136	0.0265267	1.38667	1.48363	0.0122449	0.0733945	0.051395	Inactivating
ANK2	4.91369	0.0266447	1.38762	1.21829	0.0530612	0.0756881	0.0675477	Inactivating
HDX	4.89712	0.0269014	1.39576	2.02873	0.00677966	0.0238095	0.0175219	Inactivating
FMN2	4.8902	0.0270095	1.39616	1.26487	0.0285714	0.0825688	0.0631424	Inactivating
ZNF527	4.85665	0.0275397	1.4183	2.52405	0.00816327	0.0206422	0.0161527	Inactivating
THADA	4.85665	0.0275397	1.41306	2.52405	0.00816327	0.0206422	0.0161527	Inactivating
EVPL	4.85665	0.0275397	1.40787	2.52405	0.00816327	0.0206422	0.0161527	Inactivating
ZKSCAN2	4.85665	0.0275397	1.40271	2.52405	0.00816327	0.0206422	0.0161527	Inactivating
N6AMT2	4.85665	0.0275397	1.39759	2.52405	0.00816327	0.0206422	0.0161527	Inactivating
DHX34	4.85665	0.0275397	1.39251	2.52405	0.00816327	0.0206422	0.0161527	Inactivating
FAM171A1	4.85665	0.0275397	1.38746	2.52405	0.00816327	0.0206422	0.0161527	Inactivating
KIAA0196	4.85665	0.0275397	1.38746	2.52405	0.00816327	0.0206422	0.0161527	Inactivating
FLNA	4.83781	0.0278422	1.39261	1.53113	0.0367347	0.0458716	0.0425844	Inactivating
SUMF1	4.82692	0.0280186	1.39641	1.22347	0.0237288	0.0416667	0.0350438	Inactivating
HSBP1L1	4.81133	0.0282731	1.40406	1.71158	0.00408163	0.0665138	0.0440529	Inactivating
RBFA	4.81133	0.0282731	1.40406	1.71158	0.00408163	0.0665138	0.0440529	Inactivating
CDH9	4.78312	0.0287401	1.41713	1.15938	0.0135593	0.0654762	0.0463079	Inactivating
DNAH5	4.778	0.0288256	1.41632	0.764651	0.0610169	0.134921	0.107635	Inactivating
AKAP2	4.77525	0.0288716	1.41359	2.00439	0.0163265	0.0298165	0.0249633	Inactivating
LATS2	4.77525	0.0288716	1.41359	2.00439	0.0163265	0.0298165	0.0249633	Inactivating
GABRB3	4.75864	0.0291515	1.41731	1.97969	0.00677966	0.031746	0.0225282	Inactivating
ALDH1A2	4.74591	0.0293681	1.42287	2.20445	0.0122449	0.0252294	0.020558	Inactivating
HTR1A	4.74591	0.0293681	1.41793	2.20445	0.0122449	0.0252294	0.020558	Inactivating
ATP7A	4.74591	0.0293681	1.41302	2.20445	0.0122449	0.0252294	0.020558	Inactivating
CDK8	4.74591	0.0293681	1.40815	2.20445	0.0122449	0.0252294	0.020558	Inactivating
COL4A2	4.74591	0.0293681	1.40815	2.20445	0.0122449	0.0252294	0.020558	Inactivating
CSPG4	4.74591	0.0293681	1.40815	2.20445	0.0122449	0.0252294	0.020558	Inactivating
TPTE2	4.74591	0.0293681	1.39373	2.20445	0.0122449	0.0252294	0.020558	Inactivating
ZNF257	4.74591	0.0293681	1.38899	2.20445	0.0122449	0.0252294	0.020558	Inactivating
FMO5	4.74591	0.0293681	1.38428	2.20445	0.0122449	0.0252294	0.020558	Inactivating
TCF4	4.67465	0.030611	1.43799	2.28412	0.00408163	0.0412844	0.0279001	Inactivating
MEX3C	4.67465	0.030611	1.43315	2.28412	0.00408163	0.0412844	0.0279001	Inactivating
MRO	4.67465	0.030611	1.42834	2.28412	0.00408163	0.0412844	0.0279001	Inactivating
WARS2	4.67465	0.030611	1.42356	2.28412	0.00408163	0.0412844	0.0279001	Inactivating
EP400	4.66719	0.0307442	1.42499	1.65123	0.0285714	0.0389908	0.0352423	Inactivating
ATP9B	4.6577	0.0309145	1.42813	1.45536	0.0122449	0.0711009	0.0499266	Inactivating
GHDC	4.65342	0.0309918	1.42696	3.10738	0.00408163	0.0114679	0.00881057	Inactivating
UAP1	4.65342	0.0309918	1.42225	3.10738	0.00408163	0.0114679	0.00881057	Inactivating
ALDOC	4.65342	0.0309918	1.41757	3.10738	0.00408163	0.0114679	0.00881057	Inactivating
PIK3R2	4.65342	0.0309918	1.41292	3.10738	0.00408163	0.0114679	0.00881057	Inactivating
SOX17	4.65342	0.0309918	1.4083	3.10738	0.00408163	0.0114679	0.00881057	Inactivating
FAM50B	4.65342	0.0309918	1.40372	3.10738	0.00408163	0.0114679	0.00881057	Inactivating
POLR3B	4.65342	0.0309918	1.40372	3.10738	0.00408163	0.0114679	0.00881057	Inactivating
CLK3	4.65342	0.0309918	1.39463	3.10738	0.00408163	0.0114679	0.00881057	Inactivating
CRNN	4.65342	0.0309918	1.39463	3.10738	0.00408163	0.0114679	0.00881057	Inactivating
AIFM3	4.65342	0.0309918	1.38566	3.10738	0.00408163	0.0114679	0.00881057	Inactivating
GCK	4.65342	0.0309918	1.38566	3.10738	0.00408163	0.0114679	0.00881057	Inactivating
OR5M1	4.65342	0.0309918	1.38566	3.10738	0.00408163	0.0114679	0.00881057	Inactivating
TRAM1	4.65342	0.0309918	1.37242	3.10738	0.00408163	0.0114679	0.00881057	Inactivating
ZNF37A	4.65342	0.0309918	1.37242	3.10738	0.00408163	0.0114679	0.00881057	Inactivating
KLHL26	4.65342	0.0309918	1.36374	3.10738	0.00408163	0.0114679	0.00881057	Inactivating
DCAF11	4.65342	0.0309918	1.35944	3.10738	0.00408163	0.0114679	0.00881057	Inactivating
PRTFDC1	4.65342	0.0309918	1.35944	3.10738	0.00408163	0.0114679	0.00881057	Inactivating
MN1	4.65342	0.0309918	1.35091	3.10738	0.00408163	0.0114679	0.00881057	Inactivating
PHF21B	4.65342	0.0309918	1.34669	3.10738	0.00408163	0.0114679	0.00881057	Inactivating
ST13	4.65342	0.0309918	1.34669	3.10738	0.00408163	0.0114679	0.00881057	Inactivating
CCDC47	4.65342	0.0309918	1.33833	3.10738	0.00408163	0.0114679	0.00881057	Inactivating
FOXK1	4.65342	0.0309918	1.33418	3.10738	0.00408163	0.0114679	0.00881057	Inactivating
RBM23	4.65342	0.0309918	1.33007	3.10738	0.00408163	0.0114679	0.00881057	Inactivating
KRT33A	4.65342	0.0309918	1.32597	3.10738	0.00408163	0.0114679	0.00881057	Inactivating
HP1BP3	4.65342	0.0309918	1.32191	3.10738	0.00408163	0.0114679	0.00881057	Inactivating
DHRS1	4.65342	0.0309918	1.31786	3.10738	0.00408163	0.0114679	0.00881057	Inactivating
KCNQ2	4.65342	0.0309918	1.31786	3.10738	0.00408163	0.0114679	0.00881057	Inactivating
DGCR2	4.65342	0.0309918	1.30985	3.10738	0.00408163	0.0114679	0.00881057	Inactivating
ZNF93	4.65342	0.0309918	1.30985	3.10738	0.00408163	0.0114679	0.00881057	Inactivating
PTPLA	4.65342	0.0309918	1.30194	3.10738	0.00408163	0.0114679	0.00881057	Inactivating
NETO1	4.63117	0.0313961	1.31495	1.38208	0.0163265	0.0733945	0.0528634	Inactivating
ITGA8	4.61213	0.0317465	1.32563	1.53869	0.0204082	0.0550459	0.0425844	Inactivating
CHD7	4.57586	0.0324254	1.34993	1.50954	0.0367347	0.043578	0.041116	Inactivating
FCGBP	4.57361	0.0324681	1.34767	1.46351	0.0244898	0.0573394	0.0455213	Inactivating
COL22A1	4.56157	0.0326971	1.35314	1.14828	0.020339	0.0753968	0.0550688	Inactivating
SMC1B	4.54958	0.0329269	1.3586	2.50419	0.00816327	0.0183486	0.0146843	Inactivating
NEK8	4.54958	0.0329269	1.35458	2.50419	0.00816327	0.0183486	0.0146843	Inactivating
MICU2	4.54958	0.0329269	1.35059	2.50419	0.00816327	0.0183486	0.0146843	Inactivating
ZDHHC20	4.54958	0.0329269	1.35059	2.50419	0.00816327	0.0183486	0.0146843	Inactivating
BMI1	4.54958	0.0329269	1.34266	2.50419	0.00816327	0.0183486	0.0146843	Inactivating
FCHO1	4.54958	0.0329269	1.34266	2.50419	0.00816327	0.0183486	0.0146843	Inactivating
GJB2	4.54958	0.0329269	1.33484	2.50419	0.00816327	0.0183486	0.0146843	Inactivating
INTS12	4.54958	0.0329269	1.33484	2.50419	0.00816327	0.0183486	0.0146843	Inactivating
MTMR11	4.54958	0.0329269	1.33484	2.50419	0.00816327	0.0183486	0.0146843	Inactivating
TAOK1	4.54958	0.0329269	1.33484	2.50419	0.00816327	0.0183486	0.0146843	Inactivating
ZNF551	4.54958	0.0329269	1.33484	2.50419	0.00816327	0.0183486	0.0146843	Inactivating
GGNBP2	4.54958	0.0329269	1.31566	2.50419	0.00816327	0.0183486	0.0146843	Inactivating
CES1	4.54958	0.0329269	1.31189	2.50419	0.00816327	0.0183486	0.0146843	Inactivating
WFIKKN2	4.54958	0.0329269	1.31189	2.50419	0.00816327	0.0183486	0.0146843	Inactivating
SCNN1G	4.54958	0.0329269	1.30441	2.50419	0.00816327	0.0183486	0.0146843	Inactivating
HEG1	4.54958	0.0329269	1.30071	2.50419	0.00816327	0.0183486	0.0146843	Inactivating
BTD	4.54958	0.0329269	1.29702	2.50419	0.00816327	0.0183486	0.0146843	Inactivating
LRFN5	4.53911	0.0331288	1.30129	1.58565	0.00677966	0.0416667	0.028786	Inactivating
CBLN2	4.5312	0.0332822	1.30363	1.67398	0.00408163	0.0642202	0.0425844	Inactivating
ME2	4.50695	0.0337574	1.31853	1.74143	0.0122449	0.0481651	0.0352423	Inactivating
PXDN	4.48625	0.0341686	1.33085	1.98195	0.0163265	0.0275229	0.0234949	Inactivating
FAM135B	4.47454	0.0344035	1.33626	0.914599	0.0338983	0.0992063	0.0750939	Inactivating
SETBP1	4.47002	0.0344945	1.33606	1.95001	0.00677966	0.0297619	0.0212766	activating
SLCO2A1	4.44889	0.0349239	1.34893	2.18262	0.0122449	0.0229358	0.0190896	Inactivating
CMIP	4.44889	0.0349239	1.3452	2.18262	0.0122449	0.0229358	0.0190896	Inactivating
IFNA16	4.44297	0.0350452	1.34614	1.52391	0.00816327	0.0665138	0.0455213	Inactivating
CCSER1	4.40713	0.0357891	1.37093	1.60887	0.0163265	0.0504587	0.0381791	Inactivating
VEGFC	4.39748	0.0359921	1.37492	1.62853	0.0285714	0.0366972	0.0337739	Inactivating
TSHZ1	4.39706	0.036001	1.37149	1.42618	0.0122449	0.0688073	0.0484581	Inactivating
ST8SIA3	4.3844	0.0362692	1.37793	1.91048	0.00816327	0.043578	0.030837	Inactivating
ZNF208	4.37693	0.0364287	1.38022	1.35499	0.0163265	0.0711009	0.051395	Inactivating
LRRC19	4.37011	0.0365746	1.38198	2.24767	0.00408163	0.0389908	0.0264317	Inactivating
NTRK3	4.34896	0.0370315	1.39546	1.76595	0.0101695	0.0277778	0.0212766	Inactivating
GMPR	4.33576	0.0373197	1.40251	3.0909	0.00408163	0.00917431	0.00734214	Inactivating
OSBPL11	4.33576	0.0373197	1.40251	3.0909	0.00408163	0.00917431	0.00734214	Inactivating
ZNF439	4.33576	0.0373197	1.40251	3.0909	0.00408163	0.00917431	0.00734214	Inactivating
CSH2	4.33576	0.0373197	1.39123	3.0909	0.00408163	0.00917431	0.00734214	Inactivating
XRCC1	4.33576	0.0373197	1.39123	3.0909	0.00408163	0.00917431	0.00734214	Inactivating
BCR	4.33576	0.0373197	1.38381	3.0909	0.00408163	0.00917431	0.00734214	Inactivating
GRHL3	4.33576	0.0373197	1.38381	3.0909	0.00408163	0.00917431	0.00734214	Inactivating
USP21	4.33576	0.0373197	1.38381	3.0909	0.00408163	0.00917431	0.00734214	Inactivating
WBP2NL	4.33576	0.0373197	1.37283	3.0909	0.00408163	0.00917431	0.00734214	Inactivating
CSF3R	4.33576	0.0373197	1.36921	3.0909	0.00408163	0.00917431	0.00734214	Inactivating
HAVCR2	4.33576	0.0373197	1.36921	3.0909	0.00408163	0.00917431	0.00734214	Inactivating
SPOP	4.33576	0.0373197	1.36921	3.0909	0.00408163	0.00917431	0.00734214	activating
C2orf53	4.33576	0.0373197	1.35846	3.0909	0.00408163	0.00917431	0.00734214	Inactivating
CPEB4	4.33576	0.0373197	1.35491	3.0909	0.00408163	0.00917431	0.00734214	Inactivating
COQ10A	4.33576	0.0373197	1.35138	3.0909	0.00408163	0.00917431	0.00734214	Inactivating
SLC22A17	4.33576	0.0373197	1.35138	3.0909	0.00408163	0.00917431	0.00734214	Inactivating
TCTN2	4.33576	0.0373197	1.35138	3.0909	0.00408163	0.00917431	0.00734214	Inactivating
C10orf68	4.33576	0.0373197	1.3409	3.0909	0.00408163	0.00917431	0.00734214	Inactivating
RNF180	4.33576	0.0373197	1.33745	3.0909	0.00408163	0.00917431	0.00734214	Inactivating
CSTF2T	4.33576	0.0373197	1.33401	3.0909	0.00408163	0.00917431	0.00734214	Inactivating
AKAP5	4.33576	0.0373197	1.33059	3.0909	0.00408163	0.00917431	0.00734214	Inactivating
SNRNP70	4.33576	0.0373197	1.32719	3.0909	0.00408163	0.00917431	0.00734214	Inactivating
WSB1	4.33576	0.0373197	1.32719	3.0909	0.00408163	0.00917431	0.00734214	Inactivating
HIST1H1A	4.33576	0.0373197	1.32043	3.0909	0.00408163	0.00917431	0.00734214	Inactivating
SIPA1	4.33576	0.0373197	1.32043	3.0909	0.00408163	0.00917431	0.00734214	Inactivating
ABHD15	4.33576	0.0373197	1.31375	3.0909	0.00408163	0.00917431	0.00734214	Inactivating
ELOVL2	4.33576	0.0373197	1.31375	3.0909	0.00408163	0.00917431	0.00734214	Inactivating
NT5C2	4.33576	0.0373197	1.31375	3.0909	0.00408163	0.00917431	0.00734214	Inactivating
DDX42	4.33576	0.0373197	1.30384	3.0909	0.00408163	0.00917431	0.00734214	Inactivating
MCAT	4.33576	0.0373197	1.30384	3.0909	0.00408163	0.00917431	0.00734214	Inactivating
ZNF354B	4.33576	0.0373197	1.29733	3.0909	0.00408163	0.00917431	0.00734214	Inactivating
RAB34	4.33576	0.0373197	1.29409	3.0909	0.00408163	0.00917431	0.00734214	Inactivating
SRGAP3	4.3274	0.0375034	1.29723	1.43095	0.0135593	0.031746	0.0250313	Inactivating
KIAA1468	4.32336	0.0375925	1.29708	1.27596	0.0101695	0.0515873	0.0362954	Inactivating
CTNNB1	4.31879	0.0376938	1.29736	2.50153	0.00677966	0.00992063	0.00876095	activating
TRIML2	4.30282	0.0380492	1.30636	1.33055	0.0326531	0.059633	0.0499266	Inactivating
LINC00908	4.25434	0.0391501	1.34084	1.63511	0.00408163	0.0619266	0.041116	Inactivating
IL6ST	4.24642	0.0393331	1.3438	1.94462	0.00677966	0.0238095	0.0175219	Inactivating
IRX4	4.24371	0.0393961	1.34265	2.48359	0.00816327	0.016055	0.0132159	Inactivating
EFTUD1	4.24371	0.0393961	1.33937	2.48359	0.00816327	0.016055	0.0132159	Inactivating
BMPR1B	4.24371	0.0393961	1.3361	2.48359	0.00816327	0.016055	0.0132159	Inactivating
CRB2	4.24371	0.0393961	1.3361	2.48359	0.00816327	0.016055	0.0132159	Inactivating
MED24	4.24371	0.0393961	1.32962	2.48359	0.00816327	0.016055	0.0132159	Inactivating
PTPN4	4.24371	0.0393961	1.3264	2.48359	0.00816327	0.016055	0.0132159	Inactivating
N4BP2L2	4.24371	0.0393961	1.32319	2.48359	0.00816327	0.016055	0.0132159	Inactivating
CASD1	4.24371	0.0393961	1.32001	2.48359	0.00816327	0.016055	0.0132159	Inactivating
DCLRE1A	4.24371	0.0393961	1.31683	2.48359	0.00816327	0.016055	0.0132159	Inactivating
GTF2IRD1	4.24371	0.0393961	1.31683	2.48359	0.00816327	0.016055	0.0132159	Inactivating
MIPEP	4.24371	0.0393961	1.31053	2.48359	0.00816327	0.016055	0.0132159	Inactivating
IL17D	4.24371	0.0393961	1.3074	2.48359	0.00816327	0.016055	0.0132159	Inactivating
MRP63	4.24371	0.0393961	1.3074	2.48359	0.00816327	0.016055	0.0132159	Inactivating
SAP18	4.24371	0.0393961	1.3074	2.48359	0.00816327	0.016055	0.0132159	Inactivating
PTPN14	4.22889	0.0397415	1.30949	1.71146	0.0122449	0.0458716	0.0337739	Inactivating
CD163	4.22889	0.0397415	1.3064	1.71146	0.0122449	0.0458716	0.0337739	Inactivating
LRP2	4.20934	0.040202	1.31842	1.04881	0.0530612	0.087156	0.0748899	Inactivating
TLE4	4.19893	0.0404496	1.32342	1.95856	0.0163265	0.0252294	0.0220264	Inactivating
DLC1	4.16733	0.0412107	1.34515	1.19539	0.0285714	0.0756881	0.0587372	Inactivating
MEF2C	4.16689	0.0412214	1.34235	1.23729	0.0135593	0.0436508	0.0325407	Inactivating
IL5RA	4.15336	0.041552	1.34995	2.15988	0.0122449	0.0206422	0.0176211	Inactivating
LIG3	4.15336	0.041552	1.34681	2.15988	0.0122449	0.0206422	0.0176211	Inactivating
BEND7	4.15336	0.041552	1.34368	2.15988	0.0122449	0.0206422	0.0176211	Inactivating
CLTC	4.15336	0.041552	1.34056	2.15988	0.0122449	0.0206422	0.0176211	Inactivating
SF3B3	4.15336	0.041552	1.33745	2.15988	0.0122449	0.0206422	0.0176211	Inactivating
PROM1	4.15336	0.041552	1.33437	2.15988	0.0122449	0.0206422	0.0176211	Inactivating
CDK5RAP2	4.15336	0.041552	1.33129	2.15988	0.0122449	0.0206422	0.0176211	Inactivating
FGF9	4.15336	0.041552	1.33129	2.15988	0.0122449	0.0206422	0.0176211	Inactivating
TFAP2A	4.15336	0.041552	1.32518	2.15988	0.0122449	0.0206422	0.0176211	Inactivating
KIF24	4.15336	0.041552	1.32215	2.15988	0.0122449	0.0206422	0.0176211	Inactivating
MAK16	4.15336	0.041552	1.31913	2.15988	0.0122449	0.0206422	0.0176211	Inactivating
ZNF493	4.15336	0.041552	1.31613	2.15988	0.0122449	0.0206422	0.0176211	Inactivating
NFE2L2	4.14434	0.0417738	1.32015	0.946851	0.0571429	0.105505	0.0881057	activating
TXNL4A	4.13956	0.041892	1.32088	1.39602	0.0122449	0.0665138	0.0469897	Inactivating
JMJD1C	4.13803	0.0419301	1.31909	1.58036	0.0163265	0.0481651	0.0367107	Inactivating
RTTN	4.12848	0.0421673	1.32356	1.27362	0.0204082	0.0711009	0.0528634	Inactivating
WDR17	4.09718	0.0429547	1.34524	1.23279	0.0408163	0.0619266	0.0543319	Inactivating
RNF17	4.08387	0.0432944	1.35283	1.52762	0.0326531	0.0366972	0.0352423	Inactivating
DMRT3	4.06766	0.0437118	1.36281	2.20927	0.00408163	0.0366972	0.0249633	Inactivating
PSG8	4.06766	0.0437118	1.35976	2.20927	0.00408163	0.0366972	0.0249633	Inactivating
ALDH1B1	4.06766	0.0437118	1.35672	2.20927	0.00408163	0.0366972	0.0249633	Inactivating
ZMYM2	4.0376	0.0444972	1.37802	1.79773	0.0204082	0.0275229	0.0249633	Inactivating
TRH	4.01904	0.0449894	1.39017	3.07396	0.00408163	0.00688073	0.00587372	Inactivating
IL4I1	4.01904	0.0449894	1.38709	3.07396	0.00408163	0.00688073	0.00587372	Inactivating
EHD3	4.01904	0.0449894	1.38402	3.07396	0.00408163	0.00688073	0.00587372	Inactivating
RHPN1	4.01904	0.0449894	1.38097	3.07396	0.00408163	0.00688073	0.00587372	Inactivating
RNF135	4.01904	0.0449894	1.38097	3.07396	0.00408163	0.00688073	0.00587372	Inactivating
2017-09-07	4.01904	0.0449894	1.3749	3.07396	0.00408163	0.00688073	0.00587372	Inactivating
ICAM2	4.01904	0.0449894	1.37188	3.07396	0.00408163	0.00688073	0.00587372	Inactivating
RBM43	4.01904	0.0449894	1.37188	3.07396	0.00408163	0.00688073	0.00587372	Inactivating
MMAA	4.01904	0.0449894	1.36589	3.07396	0.00408163	0.00688073	0.00587372	Inactivating
TAS2R13	4.01904	0.0449894	1.36589	3.07396	0.00408163	0.00688073	0.00587372	Inactivating
RAB3D	4.01904	0.0449894	1.35995	3.07396	0.00408163	0.00688073	0.00587372	Inactivating
LCP2	4.01904	0.0449894	1.357	3.07396	0.00408163	0.00688073	0.00587372	Inactivating
SHMT1	4.01904	0.0449894	1.357	3.07396	0.00408163	0.00688073	0.00587372	Inactivating
CCT2	4.01904	0.0449894	1.35114	3.07396	0.00408163	0.00688073	0.00587372	Inactivating
CDK5RAP3	4.01904	0.0449894	1.35114	3.07396	0.00408163	0.00688073	0.00587372	Inactivating
FCRL6	4.01904	0.0449894	1.35114	3.07396	0.00408163	0.00688073	0.00587372	Inactivating
ZNF805	4.01904	0.0449894	1.35114	3.07396	0.00408163	0.00688073	0.00587372	Inactivating
FBXW2	4.01904	0.0449894	1.33957	3.07396	0.00408163	0.00688073	0.00587372	Inactivating
FERMT2	4.01904	0.0449894	1.33957	3.07396	0.00408163	0.00688073	0.00587372	Inactivating
SLC25A39	4.01904	0.0449894	1.33957	3.07396	0.00408163	0.00688073	0.00587372	Inactivating
TMEM59L	4.01904	0.0449894	1.33102	3.07396	0.00408163	0.00688073	0.00587372	Inactivating
MRPS24	4.01904	0.0449894	1.32819	3.07396	0.00408163	0.00688073	0.00587372	Inactivating
RCSD1	4.01904	0.0449894	1.32819	3.07396	0.00408163	0.00688073	0.00587372	Inactivating
TBX4	4.01904	0.0449894	1.32819	3.07396	0.00408163	0.00688073	0.00587372	Inactivating
ANKLE1	4.01904	0.0449894	1.31979	3.07396	0.00408163	0.00688073	0.00587372	Inactivating
CORO6	4.01904	0.0449894	1.31979	3.07396	0.00408163	0.00688073	0.00587372	Inactivating
RAB3A	4.01904	0.0449894	1.31979	3.07396	0.00408163	0.00688073	0.00587372	Inactivating
G6PC	4.01904	0.0449894	1.31148	3.07396	0.00408163	0.00688073	0.00587372	Inactivating
LYZL1	4.01904	0.0449894	1.31148	3.07396	0.00408163	0.00688073	0.00587372	Inactivating
TMEM81	4.01904	0.0449894	1.30601	3.07396	0.00408163	0.00688073	0.00587372	Inactivating
C1orf85	4.01904	0.0449894	1.30329	3.07396	0.00408163	0.00688073	0.00587372	Inactivating
H1FX	4.01904	0.0449894	1.30329	3.07396	0.00408163	0.00688073	0.00587372	Inactivating
PNP	4.01904	0.0449894	1.30329	3.07396	0.00408163	0.00688073	0.00587372	Inactivating
HOXB2	4.01904	0.0449894	1.29519	3.07396	0.00408163	0.00688073	0.00587372	Inactivating
YWHAQ	4.01904	0.0449894	1.29519	3.07396	0.00408163	0.00688073	0.00587372	Inactivating
MYLK4	4.01904	0.0449894	1.28985	3.07396	0.00408163	0.00688073	0.00587372	Inactivating
C12orf77	4.01904	0.0449894	1.2872	3.07396	0.00408163	0.00688073	0.00587372	Inactivating
RHBDL3	4.01904	0.0449894	1.2872	3.07396	0.00408163	0.00688073	0.00587372	Inactivating
RHCG	4.01904	0.0449894	1.2872	3.07396	0.00408163	0.00688073	0.00587372	Inactivating
SPIC	4.01904	0.0449894	1.2872	3.07396	0.00408163	0.00688073	0.00587372	Inactivating
CCDC74B	4.01904	0.0449894	1.27669	3.07396	0.00408163	0.00688073	0.00587372	Inactivating
SH3BP1	4.01904	0.0449894	1.27409	3.07396	0.00408163	0.00688073	0.00587372	Inactivating
SLC38A2	4.01904	0.0449894	1.2715	3.07396	0.00408163	0.00688073	0.00587372	Inactivating
CENPM	4.01904	0.0449894	1.26892	3.07396	0.00408163	0.00688073	0.00587372	Inactivating
C10orf118	4.01904	0.0449894	1.26635	3.07396	0.00408163	0.00688073	0.00587372	Inactivating
ZNF250	4.01904	0.0449894	1.26635	3.07396	0.00408163	0.00688073	0.00587372	Inactivating
FAM102A	4.01904	0.0449894	1.26125	3.07396	0.00408163	0.00688073	0.00587372	Inactivating
ZNF536	4.00726	0.0453047	1.26753	1.11783	0.0367347	0.0779817	0.0631424	Inactivating
ITGAV	3.95339	0.0467771	1.3061	1.6801	0.0122449	0.043578	0.0323054	Inactivating
LAMA2	3.95202	0.0468151	1.30454	0.972885	0.044898	0.0986239	0.0792952	Inactivating
SERPINB9	3.93907	0.0471767	1.31198	2.46218	0.00816327	0.0137615	0.0117474	Inactivating
CPPED1	3.93907	0.0471767	1.30937	2.46218	0.00816327	0.0137615	0.0117474	Inactivating
EVX2	3.93907	0.0471767	1.30676	2.46218	0.00816327	0.0137615	0.0117474	Inactivating
ERCC6L	3.93907	0.0471767	1.30416	2.46218	0.00816327	0.0137615	0.0117474	Inactivating
TAF15	3.93907	0.0471767	1.30157	2.46218	0.00816327	0.0137615	0.0117474	Inactivating
ADAM17	3.93907	0.0471767	1.299	2.46218	0.00816327	0.0137615	0.0117474	Inactivating
SIN3A	3.93907	0.0471767	1.299	2.46218	0.00816327	0.0137615	0.0117474	Inactivating
OSBP	3.93907	0.0471767	1.29387	2.46218	0.00816327	0.0137615	0.0117474	Inactivating
UNC45B	3.93907	0.0471767	1.29387	2.46218	0.00816327	0.0137615	0.0117474	Inactivating
ZC3H7B	3.93907	0.0471767	1.29387	2.46218	0.00816327	0.0137615	0.0117474	Inactivating
KLHL31	3.93907	0.0471767	1.28626	2.46218	0.00816327	0.0137615	0.0117474	Inactivating
NDUFA5	3.93907	0.0471767	1.28626	2.46218	0.00816327	0.0137615	0.0117474	Inactivating
RPS6KL1	3.93907	0.0471767	1.28124	2.46218	0.00816327	0.0137615	0.0117474	Inactivating
TBC1D2B	3.93907	0.0471767	1.28124	2.46218	0.00816327	0.0137615	0.0117474	Inactivating
ZNF189	3.93907	0.0471767	1.27625	2.46218	0.00816327	0.0137615	0.0117474	Inactivating
OR10K2	3.93907	0.0471767	1.27377	2.46218	0.00816327	0.0137615	0.0117474	Inactivating
PSPC1	3.93211	0.0473725	1.27658	1.67591	0.0244898	0.0298165	0.0279001	Inactivating
LRRC4C	3.91506	0.0478553	1.2871	1.45608	0.00816327	0.0619266	0.0425844	Inactivating
UNC13A	3.91336	0.0479038	1.28591	1.93412	0.0163265	0.0229358	0.020558	Inactivating
ZNF276	3.91336	0.0479038	1.28343	1.93412	0.0163265	0.0229358	0.020558	Inactivating
WHSC1L1	3.90961	0.0480108	1.28383	1.50095	0.0169492	0.0297619	0.0250313	Inactivating
COL1A1	3.89926	0.0483074	1.28928	1.88644	0.00677966	0.0257937	0.0187735	Inactivating
PCDH15	3.89189	0.0485198	1.29247	0.775334	0.0372881	0.107143	0.0813517	Inactivating
PPFIA2	3.88537	0.0487086	1.29501	1.36482	0.0122449	0.0642202	0.0455213	Inactivating
LMAN1	3.87162	0.0491092	1.30317	1.5506	0.0163265	0.0458716	0.0352423	Inactivating
PTPRD	3.86568	0.0492831	1.3053	0.731474	0.0612245	0.167431	0.129222	Inactivating
ABCC4	3.85936	0.0494692	1.30774	2.13612	0.0122449	0.0183486	0.0161527	Inactivating
COG5	3.85936	0.0494692	1.30526	2.13612	0.0122449	0.0183486	0.0161527	Inactivating
TUBD1	3.85936	0.0494692	1.30278	2.13612	0.0122449	0.0183486	0.0161527	Inactivating
GCC2	3.85936	0.0494692	1.30032	2.13612	0.0122449	0.0183486	0.0161527	Inactivating
SPATA13	3.85936	0.0494692	1.29787	2.13612	0.0122449	0.0183486	0.0161527	Inactivating
BST1	3.85936	0.0494692	1.29542	2.13612	0.0122449	0.0183486	0.0161527	Inactivating
L1CAM	3.85936	0.0494692	1.29299	2.13612	0.0122449	0.0183486	0.0161527	Inactivating
MTNR1A	3.83243	0.0502701	1.31145	1.2421	0.0367347	0.0573394	0.0499266	Inactivating
CDH19	3.82469	0.0505027	1.31506	1.12671	0.0163265	0.0848624	0.0602056	Inactivating
DOPEY2	3.82402	0.0505229	1.31312	1.50312	0.0326531	0.0344037	0.0337739	Inactivating
HECW2	3.81212	0.0508831	1.32002	1.84203	0.00816327	0.0389908	0.0279001	Inactivating
STARD6	3.81212	0.0508831	1.32002	1.84203	0.00816327	0.0389908	0.0279001	Inactivating
EPHA5	3.80273	0.051169	1.3225	1.3277	0.0285714	0.0527523	0.0440529	Inactivating
RYR3	3.78127	0.0518292	1.33708	1.09457	0.0367347	0.0756881	0.061674	Inactivating
IFT74	3.76743	0.05226	1.3457	2.16868	0.00408163	0.0344037	0.0234949	Inactivating
FHOD3	3.76743	0.05226	1.34321	2.16868	0.00408163	0.0344037	0.0234949	Inactivating
CCDC68	3.76743	0.05226	1.34073	2.16868	0.00408163	0.0344037	0.0234949	Inactivating
DYNAP	3.76743	0.05226	1.34073	2.16868	0.00408163	0.0344037	0.0234949	Inactivating
MBD2	3.76743	0.05226	1.34073	2.16868	0.00408163	0.0344037	0.0234949	Inactivating
RAB27B	3.76743	0.05226	1.34073	2.16868	0.00408163	0.0344037	0.0234949	Inactivating
IMPG1	3.76743	0.05226	1.33091	2.16868	0.00408163	0.0344037	0.0234949	Inactivating
GNPTAB	3.76063	0.0524727	1.33388	1.77237	0.0204082	0.0252294	0.0234949	Inactivating
GMCL1	3.70324	0.0543069	1.37799	3.05652	0.00408163	0.00458716	0.00440529	Inactivating
C9orf114	3.70324	0.0543069	1.37548	3.05652	0.00408163	0.00458716	0.00440529	Inactivating
CSH1	3.70324	0.0543069	1.37298	3.05652	0.00408163	0.00458716	0.00440529	Inactivating
ERAL1	3.70324	0.0543069	1.37298	3.05652	0.00408163	0.00458716	0.00440529	Inactivating
HMOX1	3.70324	0.0543069	1.37298	3.05652	0.00408163	0.00458716	0.00440529	Inactivating
TIAF1	3.70324	0.0543069	1.37298	3.05652	0.00408163	0.00458716	0.00440529	Inactivating
C20orf112	3.70324	0.0543069	1.36306	3.05652	0.00408163	0.00458716	0.00440529	Inactivating
ADRM1	3.70324	0.0543069	1.36061	3.05652	0.00408163	0.00458716	0.00440529	Inactivating
CEBPA	3.70324	0.0543069	1.36061	3.05652	0.00408163	0.00458716	0.00440529	Inactivating
GSTT1	3.70324	0.0543069	1.36061	3.05652	0.00408163	0.00458716	0.00440529	Inactivating
DDX49	3.70324	0.0543069	1.35329	3.05652	0.00408163	0.00458716	0.00440529	Inactivating
KLRD1	3.70324	0.0543069	1.35329	3.05652	0.00408163	0.00458716	0.00440529	Inactivating
PAK4	3.70324	0.0543069	1.34846	3.05652	0.00408163	0.00458716	0.00440529	Inactivating
ING1	3.70324	0.0543069	1.34606	3.05652	0.00408163	0.00458716	0.00440529	Inactivating
TTC38	3.70324	0.0543069	1.34606	3.05652	0.00408163	0.00458716	0.00440529	Inactivating
CCDC117	3.70324	0.0543069	1.34128	3.05652	0.00408163	0.00458716	0.00440529	Inactivating
KMT2E	3.70324	0.0543069	1.34128	3.05652	0.00408163	0.00458716	0.00440529	Inactivating
PEX12	3.70324	0.0543069	1.34128	3.05652	0.00408163	0.00458716	0.00440529	Inactivating
NLE1	3.70324	0.0543069	1.33417	3.05652	0.00408163	0.00458716	0.00440529	Inactivating
OR1I1	3.70324	0.0543069	1.33417	3.05652	0.00408163	0.00458716	0.00440529	Inactivating
KLHL20	3.70324	0.0543069	1.32947	3.05652	0.00408163	0.00458716	0.00440529	Inactivating
SOX11	3.70324	0.0543069	1.32947	3.05652	0.00408163	0.00458716	0.00440529	Inactivating
TEF	3.70324	0.0543069	1.32947	3.05652	0.00408163	0.00458716	0.00440529	Inactivating
BZW2	3.70324	0.0543069	1.32248	3.05652	0.00408163	0.00458716	0.00440529	Inactivating
CHMP6	3.70324	0.0543069	1.32248	3.05652	0.00408163	0.00458716	0.00440529	Inactivating
PPWD1	3.70324	0.0543069	1.32248	3.05652	0.00408163	0.00458716	0.00440529	Inactivating
ADAP2	3.70324	0.0543069	1.31557	3.05652	0.00408163	0.00458716	0.00440529	Inactivating
SLAMF8	3.70324	0.0543069	1.31557	3.05652	0.00408163	0.00458716	0.00440529	Inactivating
UPK3A	3.70324	0.0543069	1.311	3.05652	0.00408163	0.00458716	0.00440529	Inactivating
WDR73	3.70324	0.0543069	1.311	3.05652	0.00408163	0.00458716	0.00440529	Inactivating
BIK	3.70324	0.0543069	1.30647	3.05652	0.00408163	0.00458716	0.00440529	Inactivating
EMP3	3.70324	0.0543069	1.30647	3.05652	0.00408163	0.00458716	0.00440529	Inactivating
MYL12A	3.70324	0.0543069	1.30196	3.05652	0.00408163	0.00458716	0.00440529	Inactivating
RGS11	3.70324	0.0543069	1.30196	3.05652	0.00408163	0.00458716	0.00440529	Inactivating
NXNL1	3.70324	0.0543069	1.29749	3.05652	0.00408163	0.00458716	0.00440529	Inactivating
ATE1	3.70324	0.0543069	1.29526	3.05652	0.00408163	0.00458716	0.00440529	Inactivating
HAAO	3.70324	0.0543069	1.29526	3.05652	0.00408163	0.00458716	0.00440529	Inactivating
USHBP1	3.70324	0.0543069	1.29526	3.05652	0.00408163	0.00458716	0.00440529	Inactivating
PCYT1A	3.70324	0.0543069	1.28863	3.05652	0.00408163	0.00458716	0.00440529	Inactivating
CDK3	3.70324	0.0543069	1.28644	3.05652	0.00408163	0.00458716	0.00440529	Inactivating
HSH2D	3.70324	0.0543069	1.28644	3.05652	0.00408163	0.00458716	0.00440529	Inactivating
ZCCHC17	3.70324	0.0543069	1.28644	3.05652	0.00408163	0.00458716	0.00440529	Inactivating
RHOT1	3.70324	0.0543069	1.27989	3.05652	0.00408163	0.00458716	0.00440529	Inactivating
ATP5L2	3.70324	0.0543069	1.27773	3.05652	0.00408163	0.00458716	0.00440529	Inactivating
EIF3H	3.70324	0.0543069	1.27773	3.05652	0.00408163	0.00458716	0.00440529	Inactivating
SNX11	3.70324	0.0543069	1.27773	3.05652	0.00408163	0.00458716	0.00440529	Inactivating
USP20	3.70324	0.0543069	1.27773	3.05652	0.00408163	0.00458716	0.00440529	Inactivating
CORO7	3.70324	0.0543069	1.26914	3.05652	0.00408163	0.00458716	0.00440529	Inactivating
QPCTL	3.70324	0.0543069	1.26914	3.05652	0.00408163	0.00458716	0.00440529	Inactivating
MBD4	3.70324	0.0543069	1.26489	3.05652	0.00408163	0.00458716	0.00440529	Inactivating
GATAD2A	3.70324	0.0543069	1.26277	3.05652	0.00408163	0.00458716	0.00440529	Inactivating
CDH13	3.7008	0.0543864	1.26251	1.14557	0.0285714	0.0711009	0.0558003	Inactivating
CACNA1G	3.6806	0.0550491	1.27576	1.64721	0.0122449	0.0412844	0.030837	Inactivating
ZNF676	3.6806	0.0550491	1.27364	1.64721	0.0122449	0.0412844	0.030837	Inactivating
PCDH10	3.64631	0.0561936	1.29796	1.21842	0.0204082	0.0665138	0.0499266	Inactivating
POLR1B	3.63571	0.0565525	1.30408	2.43987	0.00816327	0.0114679	0.010279	Inactivating
CCDC150	3.63571	0.0565525	1.30192	2.43987	0.00816327	0.0114679	0.010279	Inactivating
C17orf47	3.63571	0.0565525	1.29977	2.43987	0.00816327	0.0114679	0.010279	Inactivating
B3GALTL	3.63571	0.0565525	1.29763	2.43987	0.00816327	0.0114679	0.010279	Inactivating
TARS2	3.63571	0.0565525	1.29763	2.43987	0.00816327	0.0114679	0.010279	Inactivating
FAM129A	3.63571	0.0565525	1.29336	2.43987	0.00816327	0.0114679	0.010279	Inactivating
PROM2	3.63571	0.0565525	1.29124	2.43987	0.00816327	0.0114679	0.010279	Inactivating
ABHD8	3.63571	0.0565525	1.28912	2.43987	0.00816327	0.0114679	0.010279	Inactivating
NUP62	3.63571	0.0565525	1.28912	2.43987	0.00816327	0.0114679	0.010279	Inactivating
FKBP8	3.63571	0.0565525	1.28491	2.43987	0.00816327	0.0114679	0.010279	Inactivating
GUSB	3.63571	0.0565525	1.28281	2.43987	0.00816327	0.0114679	0.010279	Inactivating
CHST4	3.63571	0.0565525	1.28072	2.43987	0.00816327	0.0114679	0.010279	Inactivating
F8A2	3.63571	0.0565525	1.28072	2.43987	0.00816327	0.0114679	0.010279	Inactivating
CD2AP	3.63571	0.0565525	1.27656	2.43987	0.00816327	0.0114679	0.010279	Inactivating
TRIM37	3.63571	0.0565525	1.27656	2.43987	0.00816327	0.0114679	0.010279	Inactivating
CRLF1	3.63571	0.0565525	1.27243	2.43987	0.00816327	0.0114679	0.010279	Inactivating
ZNF613	3.63571	0.0565525	1.27243	2.43987	0.00816327	0.0114679	0.010279	Inactivating
OAS1	3.63571	0.0565525	1.26833	2.43987	0.00816327	0.0114679	0.010279	Inactivating
MAML1	3.62962	0.0567597	1.27092	1.90849	0.0163265	0.0206422	0.0190896	Inactivating
OTOP1	3.62962	0.0567597	1.27092	1.90849	0.0163265	0.0206422	0.0190896	Inactivating
NOS2	3.62962	0.0567597	1.26684	1.90849	0.0163265	0.0206422	0.0190896	Inactivating
OGDH	3.61735	0.0571799	1.27418	1.85222	0.00677966	0.0238095	0.0175219	Inactivating
ADAM18	3.61735	0.0571799	1.27214	1.85222	0.00677966	0.0238095	0.0175219	Inactivating
CCNB3	3.60805	0.0575004	1.27722	1.51945	0.0163265	0.043578	0.0337739	Inactivating
MYO16	3.60805	0.0575004	1.27519	1.51945	0.0163265	0.043578	0.0337739	Inactivating
GAK	3.60805	0.0575004	1.27316	1.51945	0.0163265	0.043578	0.0337739	Inactivating
ABCA13	3.608	0.0575021	1.27117	1.0514	0.0408163	0.0756881	0.0631424	Inactivating
PRKDC	3.57181	0.0587681	1.2971	1.25481	0.0326531	0.0527523	0.0455213	Inactivating
MAPK10	3.5704	0.0588182	1.29614	1.42713	0.0204082	0.0458716	0.0367107	Inactivating
ANKRD55	3.56695	0.0589406	1.29679	2.11124	0.0122449	0.016055	0.0146843	Inactivating
SNCAIP	3.56695	0.0589406	1.29474	2.11124	0.0122449	0.016055	0.0146843	Inactivating
C1QTNF9	3.56695	0.0589406	1.29269	2.11124	0.0122449	0.016055	0.0146843	Inactivating
ESRRB	3.56695	0.0589406	1.29269	2.11124	0.0122449	0.016055	0.0146843	Inactivating
TROAP	3.56695	0.0589406	1.28863	2.11124	0.0122449	0.016055	0.0146843	Inactivating
SLFN13	3.56695	0.0589406	1.28661	2.11124	0.0122449	0.016055	0.0146843	Inactivating
GJB6	3.56695	0.0589406	1.28459	2.11124	0.0122449	0.016055	0.0146843	Inactivating
SHANK3	3.56695	0.0589406	1.28258	2.11124	0.0122449	0.016055	0.0146843	Inactivating
CCDC158	3.56695	0.0589406	1.28058	2.11124	0.0122449	0.016055	0.0146843	Inactivating
NCOA1	3.56695	0.0589406	1.27858	2.11124	0.0122449	0.016055	0.0146843	Inactivating
FRG1	3.5577	0.0592699	1.28372	1.30048	0.0285714	0.0504587	0.0425844	Inactivating
ADAM7	3.5577	0.0592699	1.28172	1.30048	0.0285714	0.0504587	0.0425844	Inactivating
FGFR1	3.55397	0.059403	1.28261	1.40492	0.0101695	0.0277778	0.0212766	Inactivating
CHMP7	3.52986	0.0602729	1.29937	1.80504	0.00816327	0.0366972	0.0264317	Inactivating
STC1	3.52986	0.0602729	1.29937	1.80504	0.00816327	0.0366972	0.0264317	Inactivating
NPFFR2	3.52986	0.0602729	1.29535	1.80504	0.00816327	0.0366972	0.0264317	Inactivating
SHB	3.52986	0.0602729	1.29336	1.80504	0.00816327	0.0366972	0.0264317	Inactivating
MYOM1	3.52986	0.0602729	1.29136	1.80504	0.00816327	0.0366972	0.0264317	Inactivating
ITGA10	3.52986	0.0602729	1.28938	1.80504	0.00816327	0.0366972	0.0264317	Inactivating
PABPC3	3.48575	0.0618991	1.32213	1.74574	0.0204082	0.0229358	0.0220264	Inactivating
PLCG2	3.48575	0.0618991	1.3201	1.74574	0.0204082	0.0229358	0.0220264	Inactivating
OBSCN	3.48206	0.0620373	1.32102	1.02327	0.0653061	0.0665138	0.0660793	Inactivating
LRP1	3.47254	0.0623955	1.32662	1.11947	0.0285714	0.0688073	0.0543319	Inactivating
FBXL7	3.46956	0.0625081	1.32699	2.1256	0.00408163	0.0321101	0.0220264	Inactivating
KHDRBS2	3.46956	0.0625081	1.32699	2.1256	0.00408163	0.0321101	0.0220264	Inactivating
IDUA	3.46956	0.0625081	1.32295	2.1256	0.00408163	0.0321101	0.0220264	Inactivating
HSD3B2	3.46956	0.0625081	1.32093	2.1256	0.00408163	0.0321101	0.0220264	Inactivating
EYA1	3.46956	0.0625081	1.31893	2.1256	0.00408163	0.0321101	0.0220264	Inactivating
MYH13	3.46933	0.0625166	1.31711	0.841431	0.040678	0.0634921	0.0550688	Inactivating
COL11A1	3.46106	0.0628299	1.32171	0.740509	0.0508475	0.10119	0.0826033	Inactivating
HIST1H4E	3.44658	0.0633826	1.33132	1.5421	0.0135593	0.0238095	0.020025	Inactivating
AP4B1	3.41069	0.0647755	1.35853	1.61262	0.0122449	0.0389908	0.0293686	Inactivating
CBWD1	3.41069	0.0647755	1.35853	1.61262	0.0122449	0.0389908	0.0293686	Inactivating
TNFRSF10A	3.41069	0.0647755	1.35444	1.61262	0.0122449	0.0389908	0.0293686	Inactivating
KLKB1	3.396	0.0653546	1.3645	1.15955	0.0408163	0.0550459	0.0499266	Inactivating
KPNA3	3.39537	0.0653797	1.36298	1.62313	0.0244898	0.0252294	0.0249633	Inactivating
SOCS6	3.39254	0.0654921	1.36328	1.23721	0.0163265	0.0619266	0.0455213	Inactivating
CIB3	3.38838	0.0656573	1.36467	3.03855	0.00408163	0.00229358	0.00293686	Inactivating
C22orf46	3.38838	0.0656573	1.36263	3.03855	0.00408163	0.00229358	0.00293686	Inactivating
DESI1	3.38838	0.0656573	1.36263	3.03855	0.00408163	0.00229358	0.00293686	Inactivating
MEF2D	3.38838	0.0656573	1.36263	3.03855	0.00408163	0.00229358	0.00293686	Inactivating
PMM1	3.38838	0.0656573	1.36263	3.03855	0.00408163	0.00229358	0.00293686	Inactivating
BARX1	3.38838	0.0656573	1.35455	3.03855	0.00408163	0.00229358	0.00293686	Inactivating
BST2	3.38838	0.0656573	1.35455	3.03855	0.00408163	0.00229358	0.00293686	Inactivating
C19orf60	3.38838	0.0656573	1.35455	3.03855	0.00408163	0.00229358	0.00293686	Inactivating
CERS1	3.38838	0.0656573	1.35455	3.03855	0.00408163	0.00229358	0.00293686	Inactivating
GDF1	3.38838	0.0656573	1.35455	3.03855	0.00408163	0.00229358	0.00293686	Inactivating
IFI30	3.38838	0.0656573	1.35455	3.03855	0.00408163	0.00229358	0.00293686	Inactivating
KXD1	3.38838	0.0656573	1.35455	3.03855	0.00408163	0.00229358	0.00293686	Inactivating
MAU2	3.38838	0.0656573	1.35455	3.03855	0.00408163	0.00229358	0.00293686	Inactivating
MEF2B	3.38838	0.0656573	1.35455	3.03855	0.00408163	0.00229358	0.00293686	Inactivating
MEF2BNB	3.38838	0.0656573	1.35455	3.03855	0.00408163	0.00229358	0.00293686	Inactivating
MPV17L2	3.38838	0.0656573	1.35455	3.03855	0.00408163	0.00229358	0.00293686	Inactivating
PGPEP1	3.38838	0.0656573	1.35455	3.03855	0.00408163	0.00229358	0.00293686	Inactivating
PNPLA5	3.38838	0.0656573	1.35455	3.03855	0.00408163	0.00229358	0.00293686	Inactivating
PPP1CB	3.38838	0.0656573	1.35455	3.03855	0.00408163	0.00229358	0.00293686	Inactivating
RFXANK	3.38838	0.0656573	1.35455	3.03855	0.00408163	0.00229358	0.00293686	Inactivating
SDR16C5	3.38838	0.0656573	1.35455	3.03855	0.00408163	0.00229358	0.00293686	Inactivating
SUGP1	3.38838	0.0656573	1.35455	3.03855	0.00408163	0.00229358	0.00293686	Inactivating
SUGP2	3.38838	0.0656573	1.35455	3.03855	0.00408163	0.00229358	0.00293686	Inactivating
TMEM143	3.38838	0.0656573	1.35455	3.03855	0.00408163	0.00229358	0.00293686	Inactivating
TRAF4	3.38838	0.0656573	1.35455	3.03855	0.00408163	0.00229358	0.00293686	Inactivating
VEGFA	3.38838	0.0656573	1.35455	3.03855	0.00408163	0.00229358	0.00293686	Inactivating
ZNF101	3.38838	0.0656573	1.35455	3.03855	0.00408163	0.00229358	0.00293686	Inactivating
C22orf26	3.38838	0.0656573	1.31173	3.03855	0.00408163	0.00229358	0.00293686	Inactivating
CDPF1	3.38838	0.0656573	1.31173	3.03855	0.00408163	0.00229358	0.00293686	Inactivating
IL23A	3.38838	0.0656573	1.31173	3.03855	0.00408163	0.00229358	0.00293686	Inactivating
CNIH	3.38838	0.0656573	1.3061	3.03855	0.00408163	0.00229358	0.00293686	Inactivating
FAM109B	3.38838	0.0656573	1.3061	3.03855	0.00408163	0.00229358	0.00293686	Inactivating
FOXN1	3.38838	0.0656573	1.3061	3.03855	0.00408163	0.00229358	0.00293686	Inactivating
MECP2	3.38838	0.0656573	1.3061	3.03855	0.00408163	0.00229358	0.00293686	Inactivating
METTL2A	3.38838	0.0656573	1.3061	3.03855	0.00408163	0.00229358	0.00293686	Inactivating
LCE3C	3.38838	0.0656573	1.29682	3.03855	0.00408163	0.00229358	0.00293686	Inactivating
TACO1	3.38838	0.0656573	1.29498	3.03855	0.00408163	0.00229358	0.00293686	Inactivating
OSTC	3.38838	0.0656573	1.29315	3.03855	0.00408163	0.00229358	0.00293686	Inactivating
HGFAC	3.3478	0.0672948	1.32353	1.88154	0.0163265	0.0183486	0.0176211	Inactivating
DCTN1	3.3478	0.0672948	1.32166	1.88154	0.0163265	0.0183486	0.0176211	Inactivating
NWD1	3.3478	0.0672948	1.3198	1.88154	0.0163265	0.0183486	0.0176211	Inactivating
SSH2	3.3478	0.0672948	1.31794	1.88154	0.0163265	0.0183486	0.0176211	Inactivating
DSG4	3.3478	0.0672948	1.31608	1.88154	0.0163265	0.0183486	0.0176211	Inactivating
DENND4C	3.3478	0.0672948	1.31423	1.88154	0.0163265	0.0183486	0.0176211	Inactivating
FBXO11	3.3478	0.0672948	1.31423	1.88154	0.0163265	0.0183486	0.0176211	Inactivating
ZNF85	3.3478	0.0672948	1.31055	1.88154	0.0163265	0.0183486	0.0176211	Inactivating
BAZ2B	3.3475	0.067307	1.30896	1.48678	0.0163265	0.0412844	0.0323054	Inactivating
CEP192	3.34087	0.0675788	1.31241	1.5274	0.0285714	0.0275229	0.0279001	Inactivating
F8	3.34087	0.0675788	1.31058	1.5274	0.0285714	0.0275229	0.0279001	Inactivating
CSHL1	3.33365	0.0678761	1.31451	2.41657	0.00816327	0.00917431	0.00881057	Inactivating
FGF2	3.33365	0.0678761	1.31268	2.41657	0.00816327	0.00917431	0.00881057	Inactivating
PRR5	3.33365	0.0678761	1.31268	2.41657	0.00816327	0.00917431	0.00881057	Inactivating
ARRDC2	3.33365	0.0678761	1.30904	2.41657	0.00816327	0.00917431	0.00881057	Inactivating
FBXL20	3.33365	0.0678761	1.30723	2.41657	0.00816327	0.00917431	0.00881057	Inactivating
MRC2	3.33365	0.0678761	1.30723	2.41657	0.00816327	0.00917431	0.00881057	Inactivating
PELO	3.33365	0.0678761	1.30723	2.41657	0.00816327	0.00917431	0.00881057	Inactivating
CCRN4L	3.33365	0.0678761	1.30182	2.41657	0.00816327	0.00917431	0.00881057	Inactivating
FAIM3	3.33365	0.0678761	1.30182	2.41657	0.00816327	0.00917431	0.00881057	Inactivating
L3MBTL2	3.33365	0.0678761	1.29824	2.41657	0.00816327	0.00917431	0.00881057	Inactivating
AARSD1	3.33365	0.0678761	1.29645	2.41657	0.00816327	0.00917431	0.00881057	Inactivating
HEXDC	3.33365	0.0678761	1.29645	2.41657	0.00816327	0.00917431	0.00881057	Inactivating
HDAC10	3.33365	0.0678761	1.2929	2.41657	0.00816327	0.00917431	0.00881057	Inactivating
CLSTN3	3.33365	0.0678761	1.29113	2.41657	0.00816327	0.00917431	0.00881057	Inactivating
IDH2	3.33365	0.0678761	1.29113	2.41657	0.00816327	0.00917431	0.00881057	activating
CALB2	3.33365	0.0678761	1.28761	2.41657	0.00816327	0.00917431	0.00881057	Inactivating
CBLL1	3.33365	0.0678761	1.28761	2.41657	0.00816327	0.00917431	0.00881057	Inactivating
FMR1NB	3.33365	0.0678761	1.28761	2.41657	0.00816327	0.00917431	0.00881057	Inactivating
RNF157	3.33365	0.0678761	1.28761	2.41657	0.00816327	0.00917431	0.00881057	Inactivating
SDCBP	3.33365	0.0678761	1.28761	2.41657	0.00816327	0.00917431	0.00881057	Inactivating
SH3PXD2B	3.33365	0.0678761	1.27889	2.41657	0.00816327	0.00917431	0.00881057	Inactivating
OLA1	3.33365	0.0678761	1.27716	2.41657	0.00816327	0.00917431	0.00881057	Inactivating
UFD1L	3.33365	0.0678761	1.27716	2.41657	0.00816327	0.00917431	0.00881057	Inactivating
CCDC9	3.33365	0.0678761	1.27371	2.41657	0.00816327	0.00917431	0.00881057	Inactivating
KRT31	3.33365	0.0678761	1.27199	2.41657	0.00816327	0.00917431	0.00881057	Inactivating
LIN28A	3.33365	0.0678761	1.27199	2.41657	0.00816327	0.00917431	0.00881057	Inactivating
HIST1H2BC	3.33365	0.0678761	1.26857	2.41657	0.00816327	0.00917431	0.00881057	Inactivating
SLC25A12	3.33365	0.0678761	1.26687	2.41657	0.00816327	0.00917431	0.00881057	Inactivating
WDR76	3.33365	0.0678761	1.26517	2.41657	0.00816327	0.00917431	0.00881057	Inactivating
DIS3L	3.33365	0.0678761	1.26348	2.41657	0.00816327	0.00917431	0.00881057	Inactivating
UBA52	3.33365	0.0678761	1.26179	2.41657	0.00816327	0.00917431	0.00881057	Inactivating
PCYT2	3.33365	0.0678761	1.2601	2.41657	0.00816327	0.00917431	0.00881057	Inactivating
AMDHD1	3.33365	0.0678761	1.25842	2.41657	0.00816327	0.00917431	0.00881057	Inactivating
NAA35	3.33365	0.0678761	1.25675	2.41657	0.00816327	0.00917431	0.00881057	Inactivating
PTPRZ1	3.3173	0.0685542	1.26762	1.39608	0.0204082	0.043578	0.0352423	Inactivating
CANX	3.27619	0.0702918	1.29802	2.08508	0.0122449	0.0137615	0.0132159	Inactivating
GABRR1	3.27619	0.0702918	1.2963	2.08508	0.0122449	0.0137615	0.0132159	Inactivating
TEX14	3.27619	0.0702918	1.2963	2.08508	0.0122449	0.0137615	0.0132159	Inactivating
RPE65	3.27619	0.0702918	1.29287	2.08508	0.0122449	0.0137615	0.0132159	Inactivating
TRMU	3.27619	0.0702918	1.29287	2.08508	0.0122449	0.0137615	0.0132159	Inactivating
MLH3	3.27619	0.0702918	1.28946	2.08508	0.0122449	0.0137615	0.0132159	Inactivating
PNLIPRP3	3.27619	0.0702918	1.28946	2.08508	0.0122449	0.0137615	0.0132159	Inactivating
MKL2	3.27619	0.0702918	1.28606	2.08508	0.0122449	0.0137615	0.0132159	Inactivating
AP2B1	3.27619	0.0702918	1.28437	2.08508	0.0122449	0.0137615	0.0132159	Inactivating
CAGE1	3.27619	0.0702918	1.28437	2.08508	0.0122449	0.0137615	0.0132159	Inactivating
OR11H12	3.27619	0.0702918	1.28437	2.08508	0.0122449	0.0137615	0.0132159	Inactivating
BRCC3	3.27619	0.0702918	1.27933	2.08508	0.0122449	0.0137615	0.0132159	Inactivating
KAT5	3.27619	0.0702918	1.27766	2.08508	0.0122449	0.0137615	0.0132159	Inactivating
PYGO1	3.27619	0.0702918	1.27599	2.08508	0.0122449	0.0137615	0.0132159	Inactivating
SLC4A1AP	3.27619	0.0702918	1.27432	2.08508	0.0122449	0.0137615	0.0132159	Inactivating
PKD1L1	3.26975	0.0705683	1.27767	1.17816	0.020339	0.0357143	0.0300375	Inactivating
ZNF236	3.2695	0.070579	1.2762	0.91888	0.0408163	0.0894495	0.071953	Inactivating
KCNA3	3.25043	0.0714048	1.28946	1.76589	0.00816327	0.0344037	0.0249633	Inactivating
ESCO2	3.25043	0.0714048	1.28779	1.76589	0.00816327	0.0344037	0.0249633	Inactivating
ANKRD20A1	3.25043	0.0714048	1.28612	1.76589	0.00816327	0.0344037	0.0249633	Inactivating
PCDH7	3.25043	0.0714048	1.28445	1.76589	0.00816327	0.0344037	0.0249633	Inactivating
SLC22A15	3.25043	0.0714048	1.28445	1.76589	0.00816327	0.0344037	0.0249633	Inactivating
BICC1	3.25043	0.0714048	1.28114	1.76589	0.00816327	0.0344037	0.0249633	Inactivating
BAI1	3.21307	0.0730523	1.30901	1.7177	0.0204082	0.0206422	0.020558	Inactivating
GRIK1	3.21307	0.0730523	1.30901	1.7177	0.0204082	0.0206422	0.020558	Inactivating
SGOL2	3.21307	0.0730523	1.30564	1.7177	0.0204082	0.0206422	0.020558	Inactivating
SRRT	3.21307	0.0730523	1.30564	1.7177	0.0204082	0.0206422	0.020558	Inactivating
GRM1	3.20966	0.0732046	1.30501	1.12263	0.0244898	0.0642202	0.0499266	Inactivating
OLFML3	3.17423	0.0748085	1.3319	2.07968	0.00408163	0.0298165	0.020558	Inactivating
ACP6	3.17423	0.0748085	1.3302	2.07968	0.00408163	0.0298165	0.020558	Inactivating
MAN1A2	3.17423	0.0748085	1.3302	2.07968	0.00408163	0.0298165	0.020558	Inactivating
ERMP1	3.17423	0.0748085	1.3268	2.07968	0.00408163	0.0298165	0.020558	Inactivating
MOB3B	3.17423	0.0748085	1.32511	2.07968	0.00408163	0.0298165	0.020558	Inactivating
TMTC2	3.17423	0.0748085	1.32511	2.07968	0.00408163	0.0298165	0.020558	Inactivating
GRM3	3.14437	0.0761895	1.34614	1.26406	0.0122449	0.0573394	0.041116	Inactivating
CDH20	3.14437	0.0761895	1.34443	1.26406	0.0122449	0.0573394	0.041116	Inactivating
PEBP4	3.14385	0.0762139	1.34316	1.57612	0.0122449	0.0366972	0.0279001	Inactivating
GALNT13	3.14385	0.0762139	1.34146	1.57612	0.0122449	0.0366972	0.0279001	Inactivating
NHS	3.10941	0.0778414	1.36837	1.22844	0.0489796	0.0366972	0.041116	Inactivating
CPAMD8	3.09017	0.0787668	1.38289	1.45241	0.0163265	0.0389908	0.030837	Inactivating
CNTNAP3	3.09017	0.0787668	1.38115	1.45241	0.0163265	0.0389908	0.030837	Inactivating
PQLC1	3.07871	0.0793237	1.38916	1.11119	0.00816327	0.0733945	0.0499266	Inactivating
WWOX	3.07727	0.0793939	1.38864	1.24248	0.0285714	0.0458716	0.0396476	Inactivating
C1orf112	3.068	0.0798476	1.39482	1.85309	0.0163265	0.016055	0.0161527	Inactivating
PLK4	3.068	0.0798476	1.39307	1.85309	0.0163265	0.016055	0.0161527	Inactivating
CRYL1	3.068	0.0798476	1.39133	1.85309	0.0163265	0.016055	0.0161527	Inactivating
RNF40	3.068	0.0798476	1.38959	1.85309	0.0163265	0.016055	0.0161527	Inactivating
TTBK2	3.068	0.0798476	1.38785	1.85309	0.0163265	0.016055	0.0161527	Inactivating
RPUSD3	3.068	0.0798476	1.38612	1.85309	0.0163265	0.016055	0.0161527	Inactivating
MCF2L	3.068	0.0798476	1.38439	1.85309	0.0163265	0.016055	0.0161527	Inactivating
RASGRP2	3.068	0.0798476	1.38439	1.85309	0.0163265	0.016055	0.0161527	Inactivating
MYO1H	3.068	0.0798476	1.38095	1.85309	0.0163265	0.016055	0.0161527	Inactivating
CDHR2	3.068	0.0798476	1.37923	1.85309	0.0163265	0.016055	0.0161527	Inactivating
CFH	3.06749	0.0798726	1.37795	1.3635	0.0204082	0.0412844	0.0337739	Inactivating
THSD7A	3.06555	0.0799682	1.37789	0.702597	0.0474576	0.0813492	0.068836	Inactivating
MAST4	3.05967	0.0802579	1.38117	1.42246	0.0326531	0.0275229	0.0293686	Inactivating
LYPD3	3.03293	0.0815903	1.40237	2.39215	0.00816327	0.00688073	0.00734214	Inactivating
C5AR1	3.03293	0.0815903	1.40063	2.39215	0.00816327	0.00688073	0.00734214	Inactivating
MYCN	3.03293	0.0815903	1.39891	2.39215	0.00816327	0.00688073	0.00734214	activating
DPF3	3.03293	0.0815903	1.39718	2.39215	0.00816327	0.00688073	0.00734214	Inactivating
DDX19A	3.03293	0.0815903	1.39547	2.39215	0.00816327	0.00688073	0.00734214	Inactivating
PARVB	3.03293	0.0815903	1.39547	2.39215	0.00816327	0.00688073	0.00734214	Inactivating
LSM4	3.03293	0.0815903	1.39204	2.39215	0.00816327	0.00688073	0.00734214	Inactivating
PIM3	3.03293	0.0815903	1.39034	2.39215	0.00816327	0.00688073	0.00734214	Inactivating
LEFTY1	3.03293	0.0815903	1.38863	2.39215	0.00816327	0.00688073	0.00734214	Inactivating
RPUSD2	3.03293	0.0815903	1.38863	2.39215	0.00816327	0.00688073	0.00734214	Inactivating
HRH2	3.03293	0.0815903	1.38524	2.39215	0.00816327	0.00688073	0.00734214	Inactivating
ZNF607	3.03293	0.0815903	1.38524	2.39215	0.00816327	0.00688073	0.00734214	Inactivating
KMO	3.03293	0.0815903	1.38187	2.39215	0.00816327	0.00688073	0.00734214	Inactivating
PPARA	3.03293	0.0815903	1.38187	2.39215	0.00816327	0.00688073	0.00734214	Inactivating
MIER1	3.03293	0.0815903	1.37851	2.39215	0.00816327	0.00688073	0.00734214	Inactivating
CIDEB	3.03293	0.0815903	1.37684	2.39215	0.00816327	0.00688073	0.00734214	Inactivating
CIZ1	3.03293	0.0815903	1.37684	2.39215	0.00816327	0.00688073	0.00734214	Inactivating
VGF	3.03293	0.0815903	1.3735	2.39215	0.00816327	0.00688073	0.00734214	Inactivating
DDX5	3.03293	0.0815903	1.37184	2.39215	0.00816327	0.00688073	0.00734214	Inactivating
SNX29	3.03293	0.0815903	1.37184	2.39215	0.00816327	0.00688073	0.00734214	Inactivating
SP6	3.03293	0.0815903	1.37184	2.39215	0.00816327	0.00688073	0.00734214	Inactivating
OMG	3.03293	0.0815903	1.36688	2.39215	0.00816327	0.00688073	0.00734214	Inactivating
ZNF586	3.03293	0.0815903	1.36688	2.39215	0.00816327	0.00688073	0.00734214	Inactivating
SLFN12L	3.03293	0.0815903	1.3636	2.39215	0.00816327	0.00688073	0.00734214	Inactivating
ST7	3.03293	0.0815903	1.36196	2.39215	0.00816327	0.00688073	0.00734214	Inactivating
HOMER3	3.03293	0.0815903	1.36033	2.39215	0.00816327	0.00688073	0.00734214	Inactivating
FSCN2	3.03293	0.0815903	1.3587	2.39215	0.00816327	0.00688073	0.00734214	Inactivating
ZNF207	3.03293	0.0815903	1.3587	2.39215	0.00816327	0.00688073	0.00734214	Inactivating
HAT1	3.03293	0.0815903	1.35545	2.39215	0.00816327	0.00688073	0.00734214	Inactivating
NEK2	3.03293	0.0815903	1.35545	2.39215	0.00816327	0.00688073	0.00734214	Inactivating
CRLF3	3.03293	0.0815903	1.35222	2.39215	0.00816327	0.00688073	0.00734214	Inactivating
AHNAK	3.02051	0.0822177	1.361	0.696549	0.0372881	0.0972222	0.0750939	Inactivating
KRT28	2.98718	0.0839264	1.38763	2.0575	0.0122449	0.0114679	0.0117474	Inactivating
FAF1	2.98718	0.0839264	1.38598	2.0575	0.0122449	0.0114679	0.0117474	Inactivating
SNRNP48	2.98718	0.0839264	1.38598	2.0575	0.0122449	0.0114679	0.0117474	Inactivating
MAGEA11	2.98718	0.0839264	1.3827	2.0575	0.0122449	0.0114679	0.0117474	Inactivating
TADA3	2.98718	0.0839264	1.38106	2.0575	0.0122449	0.0114679	0.0117474	Inactivating
GDF5	2.98718	0.0839264	1.37943	2.0575	0.0122449	0.0114679	0.0117474	Inactivating
PHF15	2.98718	0.0839264	1.3778	2.0575	0.0122449	0.0114679	0.0117474	Inactivating
MSH2	2.98718	0.0839264	1.37618	2.0575	0.0122449	0.0114679	0.0117474	Inactivating
ZNF506	2.98718	0.0839264	1.37455	2.0575	0.0122449	0.0114679	0.0117474	Inactivating
LLGL2	2.98718	0.0839264	1.37294	2.0575	0.0122449	0.0114679	0.0117474	Inactivating
DNAI2	2.98718	0.0839264	1.37132	2.0575	0.0122449	0.0114679	0.0117474	Inactivating
CDC42BPG	2.98718	0.0839264	1.36971	2.0575	0.0122449	0.0114679	0.0117474	Inactivating
LRRC31	2.98718	0.0839264	1.36971	2.0575	0.0122449	0.0114679	0.0117474	Inactivating
LARP1	2.98718	0.0839264	1.36651	2.0575	0.0122449	0.0114679	0.0117474	Inactivating
NUP188	2.98718	0.0839264	1.36491	2.0575	0.0122449	0.0114679	0.0117474	Inactivating
SGK223	2.98531	0.0840229	1.36488	1.09321	0.0244898	0.0619266	0.0484581	Inactivating
KDM4C	2.97404	0.0846104	1.37282	1.72428	0.00816327	0.0321101	0.0234949	Inactivating
DGKQ	2.97404	0.0846104	1.37122	1.72428	0.00816327	0.0321101	0.0234949	Inactivating
SATB2	2.97404	0.0846104	1.36962	1.72428	0.00816327	0.0321101	0.0234949	Inactivating
KCTD9	2.97404	0.0846104	1.36803	1.72428	0.00816327	0.0321101	0.0234949	Inactivating
UGT2B4	2.97404	0.0846104	1.36644	1.72428	0.00816327	0.0321101	0.0234949	Inactivating
TNFRSF10C	2.97404	0.0846104	1.36486	1.72428	0.00816327	0.0321101	0.0234949	Inactivating
ZNF721	2.97404	0.0846104	1.36328	1.72428	0.00816327	0.0321101	0.0234949	Inactivating
ADAM30	2.97404	0.0846104	1.3617	1.72428	0.00816327	0.0321101	0.0234949	Inactivating
SLC25A37	2.97404	0.0846104	1.3617	1.72428	0.00816327	0.0321101	0.0234949	Inactivating
PIK3CG	2.96592	0.0850359	1.36539	1.0712	0.0135593	0.0416667	0.0312891	Inactivating
CHD1L	2.95659	0.085528	1.3717	1.35714	0.00677966	0.0337302	0.0237797	Inactivating
SORCS1	2.94989	0.0858836	1.37582	1.12809	0.0204082	0.059633	0.0455213	Inactivating
DOPEY1	2.94989	0.0858836	1.37424	1.12809	0.0204082	0.059633	0.0455213	Inactivating
ADCY8	2.94989	0.0858836	1.37266	1.12809	0.0169492	0.0515873	0.0387985	Inactivating
TDRD1	2.94271	0.0862657	1.37718	1.68806	0.0204082	0.0183486	0.0190896	Inactivating
SMARCC2	2.94271	0.0862657	1.3756	1.68806	0.0204082	0.0183486	0.0190896	Inactivating
PLAA	2.92611	0.0871574	1.38823	1.41789	0.00408163	0.0504587	0.0337739	Inactivating
HEPH	2.92347	0.0872998	1.38891	1.2538	0.0101695	0.0396825	0.028786	Inactivating
CNTNAP2	2.92114	0.0874259	1.38932	0.735273	0.0508475	0.077381	0.0675845	Inactivating
DRD5	2.88166	0.0895937	1.42215	2.03044	0.00408163	0.0275229	0.0190896	Inactivating
SMYD3	2.88166	0.0895937	1.42052	2.03044	0.00408163	0.0275229	0.0190896	Inactivating
TBX22	2.88166	0.0895937	1.41891	2.03044	0.00408163	0.0275229	0.0190896	Inactivating
ACE2	2.88166	0.0895937	1.41729	2.03044	0.00408163	0.0275229	0.0190896	Inactivating
C9orf66	2.88166	0.0895937	1.41568	2.03044	0.00408163	0.0275229	0.0190896	Inactivating
AK5	2.88166	0.0895937	1.41407	2.03044	0.00408163	0.0275229	0.0190896	Inactivating
HIST2H3D	2.88166	0.0895937	1.41247	2.03044	0.00408163	0.0275229	0.0190896	Inactivating
POTEH	2.88166	0.0895937	1.41247	2.03044	0.00408163	0.0275229	0.0190896	Inactivating
MFSD7	2.88166	0.0895937	1.40928	2.03044	0.00408163	0.0275229	0.0190896	Inactivating
MSL3	2.88166	0.0895937	1.40768	2.03044	0.00408163	0.0275229	0.0190896	Inactivating
ZNF595	2.88166	0.0895937	1.40609	2.03044	0.00408163	0.0275229	0.0190896	Inactivating
CHD2	2.88166	0.0895937	1.40451	2.03044	0.00408163	0.0275229	0.0190896	Inactivating
SPATA16	2.8803	0.0896692	1.40411	1.53747	0.0122449	0.0344037	0.0264317	Inactivating
ZNF831	2.8803	0.0896692	1.40253	1.53747	0.0122449	0.0344037	0.0264317	Inactivating
ZNF737	2.8803	0.0896692	1.40096	1.53747	0.0122449	0.0344037	0.0264317	Inactivating
ACACA	2.8803	0.0896692	1.39938	1.53747	0.0122449	0.0344037	0.0264317	Inactivating
DAAM2	2.8803	0.0896692	1.39938	1.53747	0.0122449	0.0344037	0.0264317	Inactivating
GLRA2	2.8803	0.0896692	1.39625	1.53747	0.0122449	0.0344037	0.0264317	Inactivating
LRRTM3	2.8803	0.0896692	1.39469	1.53747	0.0122449	0.0344037	0.0264317	Inactivating
TNFRSF10D	2.8803	0.0896692	1.39313	1.53747	0.0122449	0.0344037	0.0264317	Inactivating
GON4L	2.86833	0.0903388	1.40197	1.56456	0.0244898	0.0206422	0.0220264	Inactivating
VPS13C	2.85874	0.0908787	1.40877	1.01318	0.0326531	0.0642202	0.0528634	Inactivating
GALR1	2.85454	0.0911163	1.41088	1.07691	0.00816327	0.0711009	0.0484581	Inactivating
DUX4	2.84225	0.0918155	1.42013	1.21146	0.0285714	0.043578	0.0381791	Inactivating
DUX4L2	2.84225	0.0918155	1.42013	1.21146	0.0285714	0.043578	0.0381791	Inactivating
DUX4L3	2.84225	0.0918155	1.42013	1.21146	0.0285714	0.043578	0.0381791	Inactivating
DUX4L4	2.84225	0.0918155	1.42013	1.21146	0.0285714	0.043578	0.0381791	Inactivating
DUX4L5	2.84225	0.0918155	1.42013	1.21146	0.0285714	0.043578	0.0381791	Inactivating
DUX4L6	2.84225	0.0918155	1.42013	1.21146	0.0285714	0.043578	0.0381791	Inactivating
DUX4L7	2.84225	0.0918155	1.42013	1.21146	0.0285714	0.043578	0.0381791	Inactivating
FRG2	2.84225	0.0918155	1.42013	1.21146	0.0285714	0.043578	0.0381791	Inactivating
KCNU1	2.83626	0.0921584	1.41286	1.41612	0.0163265	0.0366972	0.0293686	Inactivating
SORBS3	2.83626	0.0921584	1.4113	1.41612	0.0163265	0.0366972	0.0293686	Inactivating
EVC2	2.83626	0.0921584	1.40975	1.41612	0.0163265	0.0366972	0.0293686	Inactivating
POSTN	2.83626	0.0921584	1.4082	1.41612	0.0163265	0.0366972	0.0293686	Inactivating
CAMTA1	2.82506	0.0928037	1.4165	1.26333	0.0244898	0.0412844	0.0352423	Inactivating
PDLIM3	2.82119	0.0930276	1.41836	1.32922	0.0204082	0.0389908	0.0323054	Inactivating
HIVEP1	2.81045	0.093652	1.42632	1.33092	0.0367347	0.0275229	0.030837	Inactivating
COLEC12	2.79034	0.0948341	1.44274	1.82293	0.0163265	0.0137615	0.0146843	Inactivating
AQR	2.79034	0.0948341	1.44117	1.82293	0.0163265	0.0137615	0.0146843	Inactivating
ABCD4	2.79034	0.0948341	1.43959	1.82293	0.0163265	0.0137615	0.0146843	Inactivating
TEX10	2.79034	0.0948341	1.43959	1.82293	0.0163265	0.0137615	0.0146843	Inactivating
ATP11B	2.79034	0.0948341	1.43646	1.82293	0.0163265	0.0137615	0.0146843	Inactivating
ZBED4	2.79034	0.0948341	1.43489	1.82293	0.0163265	0.0137615	0.0146843	Inactivating
RBM15	2.78739	0.095009	1.43598	1.73717	0.00677966	0.0178571	0.0137672	Inactivating
MUC17	2.76601	0.0962856	1.45369	0.80636	0.0571429	0.0894495	0.0778267	Inactivating
AKT3	2.73738	0.0980256	1.47836	1.57244	0.0101695	0.015873	0.0137672	Inactivating
HSPBAP1	2.73362	0.0982566	1.48024	2.36649	0.00816327	0.00458716	0.00587372	Inactivating
N6AMT1	2.73362	0.0982566	1.47863	2.36649	0.00816327	0.00458716	0.00587372	Inactivating
LRRC25	2.73362	0.0982566	1.47704	2.36649	0.00816327	0.00458716	0.00587372	Inactivating
DNAJB1	2.73362	0.0982566	1.47544	2.36649	0.00816327	0.00458716	0.00587372	Inactivating
IL17REL	2.73362	0.0982566	1.47544	2.36649	0.00816327	0.00458716	0.00587372	Inactivating
TTLL1	2.73362	0.0982566	1.47544	2.36649	0.00816327	0.00458716	0.00587372	Inactivating
MKS1	2.73362	0.0982566	1.47068	2.36649	0.00816327	0.00458716	0.00587372	Inactivating
RAD51	2.73362	0.0982566	1.4691	2.36649	0.00816327	0.00458716	0.00587372	Inactivating
TRABD	2.73362	0.0982566	1.4691	2.36649	0.00816327	0.00458716	0.00587372	Inactivating
EIF3I	2.73362	0.0982566	1.46594	2.36649	0.00816327	0.00458716	0.00587372	Inactivating
NUP85	2.73362	0.0982566	1.46437	2.36649	0.00816327	0.00458716	0.00587372	Inactivating
GLIS2	2.73362	0.0982566	1.4628	2.36649	0.00816327	0.00458716	0.00587372	Inactivating
PNCK	2.73362	0.0982566	1.46124	2.36649	0.00816327	0.00458716	0.00587372	Inactivating
RCAN3	2.73362	0.0982566	1.46124	2.36649	0.00816327	0.00458716	0.00587372	Inactivating
MFSD11	2.73362	0.0982566	1.45812	2.36649	0.00816327	0.00458716	0.00587372	Inactivating
FLJ27365	2.73362	0.0982566	1.45657	2.36649	0.00816327	0.00458716	0.00587372	Inactivating
RPL7L1	2.73362	0.0982566	1.45657	2.36649	0.00816327	0.00458716	0.00587372	Inactivating
ZCWPW1	2.73362	0.0982566	1.45347	2.36649	0.00816327	0.00458716	0.00587372	Inactivating
ATP5J	2.73362	0.0982566	1.45192	2.36649	0.00816327	0.00458716	0.00587372	Inactivating
CCDC124	2.73362	0.0982566	1.45192	2.36649	0.00816327	0.00458716	0.00587372	Inactivating
ADM2	2.73362	0.0982566	1.44884	2.36649	0.00816327	0.00458716	0.00587372	Inactivating
CASP14	2.73362	0.0982566	1.44884	2.36649	0.00816327	0.00458716	0.00587372	Inactivating
TTC5	2.73362	0.0982566	1.44578	2.36649	0.00816327	0.00458716	0.00587372	Inactivating
ZNF830	2.73362	0.0982566	1.44578	2.36649	0.00816327	0.00458716	0.00587372	Inactivating
TPTE	2.72567	0.0987464	1.44991	1.09564	0.0204082	0.0573394	0.0440529	Inactivating
F11	2.72445	0.0988219	1.44949	1.0775	0.0408163	0.0481651	0.0455213	Inactivating
MYCBP2	2.70322	0.100146	1.46737	0.96695	0.0367347	0.0642202	0.0543319	Inactivating
HSD3B1	2.70094	0.100289	1.46791	1.67985	0.00816327	0.0298165	0.0220264	Inactivating
POTEG	2.70094	0.100289	1.46637	1.67985	0.00816327	0.0298165	0.0220264	Inactivating
RGS7	2.70094	0.100289	1.46637	1.67985	0.00816327	0.0298165	0.0220264	Inactivating
AOX1	2.70094	0.100289	1.46329	1.67985	0.00816327	0.0298165	0.0220264	Inactivating
DCTN6	2.70094	0.100289	1.46329	1.67985	0.00816327	0.0298165	0.0220264	Inactivating
IGF1R	2.70094	0.100289	1.46329	1.67985	0.00816327	0.0298165	0.0220264	Inactivating
KIAA1199	2.70094	0.100289	1.4587	1.67985	0.00816327	0.0298165	0.0220264	Inactivating
PNPLA4	2.70094	0.100289	1.4587	1.67985	0.00816327	0.0298165	0.0220264	Inactivating
PKDREJ	2.70094	0.100289	1.45565	1.67985	0.00816327	0.0298165	0.0220264	Inactivating
FP15737	2.70094	0.100289	1.45414	1.67985	0.00816327	0.0298165	0.0220264	Inactivating
IDO1	2.70094	0.100289	1.45414	1.67985	0.00816327	0.0298165	0.0220264	Inactivating
KCNV1	2.70094	0.100289	1.45414	1.67985	0.00816327	0.0298165	0.0220264	Inactivating
R3HCC1	2.70094	0.100289	1.45414	1.67985	0.00816327	0.0298165	0.0220264	Inactivating
ANKRD20A2	2.70094	0.100289	1.4481	1.67985	0.00816327	0.0298165	0.0220264	Inactivating
ANKRD20A3	2.70094	0.100289	1.4481	1.67985	0.00816327	0.0298165	0.0220264	Inactivating
CBWD5	2.70094	0.100289	1.4481	1.67985	0.00816327	0.0298165	0.0220264	Inactivating
CBWD7	2.70094	0.100289	1.4481	1.67985	0.00816327	0.0298165	0.0220264	Inactivating
CNTNAP3B	2.70094	0.100289	1.4481	1.67985	0.00816327	0.0298165	0.0220264	Inactivating
FAM27A	2.70094	0.100289	1.4481	1.67985	0.00816327	0.0298165	0.0220264	Inactivating
FAM27B	2.70094	0.100289	1.4481	1.67985	0.00816327	0.0298165	0.0220264	Inactivating
FAM27C	2.70094	0.100289	1.4481	1.67985	0.00816327	0.0298165	0.0220264	Inactivating
FAM27D1	2.70094	0.100289	1.4481	1.67985	0.00816327	0.0298165	0.0220264	Inactivating
FAM27E1	2.70094	0.100289	1.4481	1.67985	0.00816327	0.0298165	0.0220264	Inactivating
FAM27E2	2.70094	0.100289	1.4481	1.67985	0.00816327	0.0298165	0.0220264	Inactivating
FAM27E3	2.70094	0.100289	1.4481	1.67985	0.00816327	0.0298165	0.0220264	Inactivating
FOXD4L2	2.70094	0.100289	1.4481	1.67985	0.00816327	0.0298165	0.0220264	Inactivating
FOXD4L3	2.70094	0.100289	1.4481	1.67985	0.00816327	0.0298165	0.0220264	Inactivating
FOXD4L4	2.70094	0.100289	1.4481	1.67985	0.00816327	0.0298165	0.0220264	Inactivating
FOXD4L6	2.70094	0.100289	1.4481	1.67985	0.00816327	0.0298165	0.0220264	Inactivating
SPATA31A1	2.70094	0.100289	1.4481	1.67985	0.00816327	0.0298165	0.0220264	Inactivating
SPATA31A2	2.70094	0.100289	1.4481	1.67985	0.00816327	0.0298165	0.0220264	Inactivating
SPATA31A3	2.70094	0.100289	1.4481	1.67985	0.00816327	0.0298165	0.0220264	Inactivating
SPATA31A4	2.70094	0.100289	1.4481	1.67985	0.00816327	0.0298165	0.0220264	Inactivating
SPATA31A5	2.70094	0.100289	1.4481	1.67985	0.00816327	0.0298165	0.0220264	Inactivating
SPATA31A6	2.70094	0.100289	1.4481	1.67985	0.00816327	0.0298165	0.0220264	Inactivating
SPATA31A7	2.70094	0.100289	1.4481	1.67985	0.00816327	0.0298165	0.0220264	Inactivating
ZNF395	2.70094	0.100289	1.41432	1.67985	0.00816327	0.0298165	0.0220264	Inactivating
GABPB1	2.69999	0.100349	1.41373	2.02828	0.0122449	0.00917431	0.010279	Inactivating
CCDC78	2.69999	0.100349	1.4123	2.02828	0.0122449	0.00917431	0.010279	Inactivating
SPPL2A	2.69999	0.100349	1.4123	2.02828	0.0122449	0.00917431	0.010279	Inactivating
TSPAN8	2.69999	0.100349	1.40945	2.02828	0.0122449	0.00917431	0.010279	Inactivating
TAF9	2.69999	0.100349	1.40803	2.02828	0.0122449	0.00917431	0.010279	Inactivating
TMPRSS11D	2.69999	0.100349	1.40803	2.02828	0.0122449	0.00917431	0.010279	Inactivating
ANXA3	2.69999	0.100349	1.40519	2.02828	0.0122449	0.00917431	0.010279	Inactivating
KRT1	2.69999	0.100349	1.40378	2.02828	0.0122449	0.00917431	0.010279	Inactivating
C12orf43	2.69999	0.100349	1.40237	2.02828	0.0122449	0.00917431	0.010279	Inactivating
ASPN	2.69999	0.100349	1.40096	2.02828	0.0122449	0.00917431	0.010279	Inactivating
CYP39A1	2.69999	0.100349	1.40096	2.02828	0.0122449	0.00917431	0.010279	Inactivating
UNK	2.69999	0.100349	1.39815	2.02828	0.0122449	0.00917431	0.010279	Inactivating
DIRC2	2.69999	0.100349	1.39675	2.02828	0.0122449	0.00917431	0.010279	Inactivating
EXOSC9	2.69999	0.100349	1.39675	2.02828	0.0122449	0.00917431	0.010279	Inactivating
ANGEL1	2.69999	0.100349	1.39396	2.02828	0.0122449	0.00917431	0.010279	Inactivating
OR13C2	2.69999	0.100349	1.39257	2.02828	0.0122449	0.00917431	0.010279	Inactivating
FAM19A5	2.69999	0.100349	1.39118	2.02828	0.0122449	0.00917431	0.010279	Inactivating
MAPK8IP2	2.69999	0.100349	1.3898	2.02828	0.0122449	0.00917431	0.010279	Inactivating
ZNF100	2.69999	0.100349	1.3898	2.02828	0.0122449	0.00917431	0.010279	Inactivating
ADCY2	2.69337	0.100766	1.3928	1.13679	0.0163265	0.0550459	0.041116	Inactivating
BBS9	2.68744	0.101142	1.39661	1.54367	0.0101695	0.0198413	0.0162703	Inactivating
COL6A5	2.67483	0.101946	1.40631	1.65657	0.0204082	0.016055	0.0176211	Inactivating
MEI1	2.67483	0.101946	1.40492	1.65657	0.0204082	0.016055	0.0176211	Inactivating
SYCP1	2.66123	0.102821	1.41558	1.26203	0.00816327	0.0504587	0.0352423	Inactivating
NINL	2.62032	0.105503	1.45106	1.49637	0.0122449	0.0321101	0.0249633	Inactivating
KCNJ12	2.62032	0.105503	1.44963	1.49637	0.0122449	0.0321101	0.0249633	Inactivating
ADAM32	2.62032	0.105503	1.4482	1.49637	0.0122449	0.0321101	0.0249633	Inactivating
FOXD4L5	2.62032	0.105503	1.4482	1.49637	0.0122449	0.0321101	0.0249633	Inactivating
CHRNA2	2.62032	0.105503	1.44534	1.49637	0.0122449	0.0321101	0.0249633	Inactivating
XKR4	2.62032	0.105503	1.44392	1.49637	0.0122449	0.0321101	0.0249633	Inactivating
CDK13	2.60883	0.10627	1.45298	1.53258	0.0244898	0.0183486	0.020558	Inactivating
PCNXL2	2.60883	0.10627	1.45156	1.53258	0.0244898	0.0183486	0.020558	Inactivating
ARID1A	2.6041	0.106588	1.45447	0.883613	0.0474576	0.0456349	0.0463079	Inactivating
USP17L2	2.59666	0.107089	1.45987	1.00568	0.0285714	0.059633	0.0484581	Inactivating
HAO2	2.59211	0.107397	1.46264	1.97734	0.00408163	0.0252294	0.0176211	Inactivating
PLXDC2	2.59211	0.107397	1.46121	1.97734	0.00408163	0.0252294	0.0176211	Inactivating
PRKX	2.59211	0.107397	1.46121	1.97734	0.00408163	0.0252294	0.0176211	Inactivating
ASB9	2.59211	0.107397	1.45836	1.97734	0.00408163	0.0252294	0.0176211	Inactivating
OR4Q3	2.59211	0.107397	1.45836	1.97734	0.00408163	0.0252294	0.0176211	Inactivating
HIST2H2BF	2.59211	0.107397	1.45552	1.97734	0.00408163	0.0252294	0.0176211	Inactivating
CDH6	2.59211	0.107397	1.4541	1.97734	0.00408163	0.0252294	0.0176211	Inactivating
CXorf28	2.59211	0.107397	1.4541	1.97734	0.00408163	0.0252294	0.0176211	Inactivating
SH3PXD2A	2.59211	0.107397	1.45127	1.97734	0.00408163	0.0252294	0.0176211	Inactivating
PRKCG	2.59211	0.107397	1.44986	1.97734	0.00408163	0.0252294	0.0176211	Inactivating
MOSPD2	2.59211	0.107397	1.44846	1.97734	0.00408163	0.0252294	0.0176211	Inactivating
MED12L	2.5887	0.107629	1.45017	1.22907	0.0244898	0.0389908	0.0337739	Inactivating
ZNF91	2.5887	0.107629	1.44877	1.22907	0.0244898	0.0389908	0.0337739	Inactivating
ANKRD30B	2.58605	0.107809	1.44979	1.37768	0.0163265	0.0344037	0.0279001	Inactivating
ZNF654	2.57864	0.108315	1.45518	1.29302	0.0204082	0.0366972	0.030837	Inactivating
VPS13A	2.55894	0.109672	1.472	1.02553	0.044898	0.0481651	0.0469897	Inactivating
UNC13C	2.55042	0.110265	1.47852	0.865008	0.0326531	0.0779817	0.061674	Inactivating
ROS1	2.54355	0.110746	1.48354	0.719919	0.040678	0.0694444	0.0588235	Inactivating
INPP4A	2.54071	0.110945	1.48478	1.2436	0.0101695	0.0238095	0.0187735	Inactivating
SULT1B1	2.51496	0.112771	1.50777	1.79079	0.0163265	0.0114679	0.0132159	Inactivating
CHST5	2.51496	0.112771	1.50632	1.79079	0.0163265	0.0114679	0.0132159	Inactivating
PHC2	2.51496	0.112771	1.50487	1.79079	0.0163265	0.0114679	0.0132159	Inactivating
SLC9A1	2.51496	0.112771	1.50487	1.79079	0.0163265	0.0114679	0.0132159	Inactivating
DSG3	2.51496	0.112771	1.50199	1.79079	0.0163265	0.0114679	0.0132159	Inactivating
RPAP1	2.51496	0.112771	1.50055	1.79079	0.0163265	0.0114679	0.0132159	Inactivating
MTTP	2.51496	0.112771	1.49912	1.79079	0.0163265	0.0114679	0.0132159	Inactivating
ZNF814	2.51496	0.112771	1.49768	1.79079	0.0163265	0.0114679	0.0132159	Inactivating
GFPT2	2.51496	0.112771	1.49626	1.79079	0.0163265	0.0114679	0.0132159	Inactivating
COL19A1	2.46121	0.116689	1.54677	1.07416	0.0367347	0.043578	0.041116	Inactivating
SLIT2	2.44216	0.118114	1.56416	0.955075	0.0326531	0.059633	0.0499266	Inactivating
COL14A1	2.44042	0.118244	1.5644	1.15035	0.0122449	0.0504587	0.0367107	Inactivating
ZNF532	2.44042	0.118244	1.56292	1.15035	0.0122449	0.0504587	0.0367107	Inactivating
DPYD	2.44042	0.118244	1.56143	1.15035	0.0122449	0.0504587	0.0367107	Inactivating
MFHAS1	2.44042	0.118244	1.55995	1.15035	0.0122449	0.0504587	0.0367107	Inactivating
C22orf34	2.43575	0.118597	1.56312	2.3394	0.00816327	0.00229358	0.00440529	Inactivating
DENND6B	2.43575	0.118597	1.56312	2.3394	0.00816327	0.00229358	0.00440529	Inactivating
MLC1	2.43575	0.118597	1.56312	2.3394	0.00816327	0.00229358	0.00440529	Inactivating
ODF3B	2.43575	0.118597	1.56312	2.3394	0.00816327	0.00229358	0.00440529	Inactivating
PPM1E	2.43575	0.118597	1.56312	2.3394	0.00816327	0.00229358	0.00440529	Inactivating
PPP6R2	2.43575	0.118597	1.56312	2.3394	0.00816327	0.00229358	0.00440529	Inactivating
RABL2B	2.43575	0.118597	1.56312	2.3394	0.00816327	0.00229358	0.00440529	Inactivating
SYCE3	2.43575	0.118597	1.56312	2.3394	0.00816327	0.00229358	0.00440529	Inactivating
CD320	2.43575	0.118597	1.55136	2.3394	0.00816327	0.00229358	0.00440529	Inactivating
NFYA	2.43575	0.118597	1.55136	2.3394	0.00816327	0.00229358	0.00440529	Inactivating
EPC1	2.43575	0.118597	1.54845	2.3394	0.00816327	0.00229358	0.00440529	Inactivating
PNPLA3	2.43575	0.118597	1.54845	2.3394	0.00816327	0.00229358	0.00440529	Inactivating
EIF3G	2.43575	0.118597	1.54554	2.3394	0.00816327	0.00229358	0.00440529	Inactivating
GTPBP2	2.43575	0.118597	1.54554	2.3394	0.00816327	0.00229358	0.00440529	Inactivating
C14orf183	2.43575	0.118597	1.54265	2.3394	0.00816327	0.00229358	0.00440529	Inactivating
ANKRD13B	2.43575	0.118597	1.54121	2.3394	0.00816327	0.00229358	0.00440529	Inactivating
SULT2B1	2.43575	0.118597	1.54121	2.3394	0.00816327	0.00229358	0.00440529	Inactivating
C17orf50	2.43575	0.118597	1.53834	2.3394	0.00816327	0.00229358	0.00440529	Inactivating
CENPK	2.43575	0.118597	1.53834	2.3394	0.00816327	0.00229358	0.00440529	Inactivating
P2RY4	2.43575	0.118597	1.53834	2.3394	0.00816327	0.00229358	0.00440529	Inactivating
APOBEC4	2.43575	0.118597	1.53404	2.3394	0.00816327	0.00229358	0.00440529	Inactivating
GALNT9	2.43575	0.118597	1.53404	2.3394	0.00816327	0.00229358	0.00440529	Inactivating
TM6SF2	2.43575	0.118597	1.53404	2.3394	0.00816327	0.00229358	0.00440529	Inactivating
ZBTB49	2.43145	0.118923	1.53397	1.63216	0.00816327	0.0275229	0.020558	Inactivating
SEMA3E	2.43145	0.118923	1.53255	1.63216	0.00816327	0.0275229	0.020558	Inactivating
GNRH1	2.43145	0.118923	1.53113	1.63216	0.00816327	0.0275229	0.020558	Inactivating
BAG4	2.43145	0.118923	1.52971	1.63216	0.00816327	0.0275229	0.020558	Inactivating
MYBPC1	2.43145	0.118923	1.5283	1.63216	0.00816327	0.0275229	0.020558	Inactivating
ACO1	2.43145	0.118923	1.52689	1.63216	0.00816327	0.0275229	0.020558	Inactivating
CDH18	2.43145	0.118923	1.52689	1.63216	0.00816327	0.0275229	0.020558	Inactivating
DDX53	2.43145	0.118923	1.52689	1.63216	0.00816327	0.0275229	0.020558	Inactivating
KIAA1211	2.43145	0.118923	1.52689	1.63216	0.00816327	0.0275229	0.020558	Inactivating
DMRT1	2.43145	0.118923	1.52127	1.63216	0.00816327	0.0275229	0.020558	Inactivating
KCNQ3	2.43145	0.118923	1.51987	1.63216	0.00816327	0.0275229	0.020558	Inactivating
NLRP7	2.43145	0.118923	1.51987	1.63216	0.00816327	0.0275229	0.020558	Inactivating
TCEB3B	2.43145	0.118923	1.51987	1.63216	0.00816327	0.0275229	0.020558	Inactivating
RGS22	2.43145	0.118923	1.51569	1.63216	0.00816327	0.0275229	0.020558	Inactivating
RBPMS	2.43145	0.118923	1.51431	1.63216	0.00816327	0.0275229	0.020558	Inactivating
SERPINB2	2.42596	0.11934	1.51823	1.31765	0.00408163	0.0458716	0.030837	Inactivating
SERPINB10	2.42379	0.119505	1.51894	1.21797	0.00816327	0.0481651	0.0337739	Inactivating
NETO2	2.42203	0.11964	1.51926	2.00616	0.00338983	0.0119048	0.00876095	Inactivating
ADAM15	2.41473	0.120199	1.52497	1.99716	0.0122449	0.00688073	0.00881057	Inactivating
PGBD5	2.41473	0.120199	1.52358	1.99716	0.0122449	0.00688073	0.00881057	Inactivating
ZNF519	2.41473	0.120199	1.52358	1.99716	0.0122449	0.00688073	0.00881057	Inactivating
HSD17B11	2.41473	0.120199	1.5208	1.99716	0.0122449	0.00688073	0.00881057	Inactivating
FCHO2	2.41473	0.120199	1.51942	1.99716	0.0122449	0.00688073	0.00881057	Inactivating
FRMD6	2.41473	0.120199	1.51942	1.99716	0.0122449	0.00688073	0.00881057	Inactivating
HAUS5	2.41473	0.120199	1.51942	1.99716	0.0122449	0.00688073	0.00881057	Inactivating
NR2C2AP	2.41473	0.120199	1.51529	1.99716	0.0122449	0.00688073	0.00881057	Inactivating
TTLL12	2.41473	0.120199	1.51392	1.99716	0.0122449	0.00688073	0.00881057	Inactivating
EXOC8	2.41473	0.120199	1.51255	1.99716	0.0122449	0.00688073	0.00881057	Inactivating
SPP1	2.41473	0.120199	1.51255	1.99716	0.0122449	0.00688073	0.00881057	Inactivating
TXNDC16	2.41473	0.120199	1.51255	1.99716	0.0122449	0.00688073	0.00881057	Inactivating
PHF12	2.41473	0.120199	1.50845	1.99716	0.0122449	0.00688073	0.00881057	Inactivating
CCDC77	2.41473	0.120199	1.50709	1.99716	0.0122449	0.00688073	0.00881057	Inactivating
DTX3L	2.41473	0.120199	1.50709	1.99716	0.0122449	0.00688073	0.00881057	Inactivating
DIRAS3	2.41473	0.120199	1.50438	1.99716	0.0122449	0.00688073	0.00881057	Inactivating
MFAP4	2.41473	0.120199	1.50302	1.99716	0.0122449	0.00688073	0.00881057	Inactivating
TCERG1L	2.41473	0.120199	1.50302	1.99716	0.0122449	0.00688073	0.00881057	Inactivating
MYH8	2.41144	0.120451	1.50348	0.729623	0.0338983	0.0615079	0.0513141	Inactivating
MEPE	2.40961	0.120592	1.50389	1.62295	0.0204082	0.0137615	0.0161527	Inactivating
ZNF620	2.40961	0.120592	1.50254	1.62295	0.0204082	0.0137615	0.0161527	Inactivating
FAM13A	2.40961	0.120592	1.5012	1.62295	0.0204082	0.0137615	0.0161527	Inactivating
MFAP1	2.40961	0.120592	1.49985	1.62295	0.0204082	0.0137615	0.0161527	Inactivating
ANKFN1	2.40961	0.120592	1.49851	1.62295	0.0204082	0.0137615	0.0161527	Inactivating
RB1CC1	2.39021	0.122097	1.51586	1.01859	0.0135593	0.0277778	0.0225282	Inactivating
RUNX1T1	2.38799	0.122271	1.51666	0.974506	0.0285714	0.0573394	0.0469897	Inactivating
TRPC4	2.38378	0.122601	1.5194	1.14464	0.0285714	0.0389908	0.0352423	Inactivating
FAM47A	2.3695	0.123726	1.53198	0.902099	0.0204082	0.0711009	0.0528634	Inactivating
FZD3	2.36421	0.124147	1.53582	1.45245	0.0122449	0.0298165	0.0234949	Inactivating
OR4M1	2.36421	0.124147	1.53445	1.45245	0.0122449	0.0298165	0.0234949	Inactivating
PIGG	2.36421	0.124147	1.53309	1.45245	0.0122449	0.0298165	0.0234949	Inactivating
MYO7A	2.36421	0.124147	1.53173	1.45245	0.0122449	0.0298165	0.0234949	Inactivating
POLA1	2.36421	0.124147	1.53173	1.45245	0.0122449	0.0298165	0.0234949	Inactivating
DZIP3	2.36421	0.124147	1.52901	1.45245	0.0122449	0.0298165	0.0234949	Inactivating
MAOA	2.36421	0.124147	1.52766	1.45245	0.0122449	0.0298165	0.0234949	Inactivating
ZNF423	2.3564	0.12477	1.53398	1.1929	0.0244898	0.0366972	0.0323054	Inactivating
KRAS	2.35049	0.125244	1.53844	0.832597	0.0440678	0.031746	0.0362954	activating
NAV3	2.34313	0.125837	1.54436	0.656341	0.0542373	0.0793651	0.0700876	Inactivating
AFF2	2.34015	0.126078	1.54595	1.25466	0.0204082	0.0344037	0.0293686	Inactivating
UFSP2	2.34015	0.126078	1.54595	1.25466	0.0204082	0.0344037	0.0293686	Inactivating
CNTNAP4	2.34015	0.126078	1.54323	1.25466	0.0204082	0.0344037	0.0293686	Inactivating
GRIN3A	2.33985	0.126102	1.54217	1.33678	0.0163265	0.0321101	0.0264317	Inactivating
NSD1	2.32715	0.127135	1.55344	0.520823	0.0576271	0.132937	0.105131	Inactivating
SALL3	2.32622	0.12721	1.553	0.802504	0.0204082	0.087156	0.0631424	Inactivating
SCML1	2.3059	0.128884	1.57204	1.91964	0.00408163	0.0229358	0.0161527	Inactivating
CIITA	2.3059	0.128884	1.57066	1.91964	0.00408163	0.0229358	0.0161527	Inactivating
OR8J1	2.3059	0.128884	1.56929	1.91964	0.00408163	0.0229358	0.0161527	Inactivating
SIN3B	2.3059	0.128884	1.56929	1.91964	0.00408163	0.0229358	0.0161527	Inactivating
DPPA4	2.3059	0.128884	1.56654	1.91964	0.00408163	0.0229358	0.0161527	Inactivating
KIAA1328	2.3059	0.128884	1.56654	1.91964	0.00408163	0.0229358	0.0161527	Inactivating
ASH2L	2.3059	0.128884	1.56381	1.91964	0.00408163	0.0229358	0.0161527	Inactivating
ERLIN2	2.3059	0.128884	1.56245	1.91964	0.00408163	0.0229358	0.0161527	Inactivating
NEGR1	2.3059	0.128884	1.56245	1.91964	0.00408163	0.0229358	0.0161527	Inactivating
FSHR	2.3059	0.128884	1.55973	1.91964	0.00408163	0.0229358	0.0161527	Inactivating
LETM2	2.3059	0.128884	1.55837	1.91964	0.00408163	0.0229358	0.0161527	Inactivating
FCGR1B	2.3059	0.128884	1.55702	1.91964	0.00408163	0.0229358	0.0161527	Inactivating
CTNNA2	2.29059	0.130161	1.57108	1.02661	0.0204082	0.0527523	0.041116	Inactivating
MDM2	2.2886	0.130327	1.57172	0.683182	0.0237288	0.0595238	0.0463079	activating
DPP6	2.24935	0.13367	1.61065	1.06252	0.0163265	0.0504587	0.0381791	Inactivating
MSR1	2.24935	0.13367	1.60925	1.06252	0.0163265	0.0504587	0.0381791	Inactivating
TUSC3	2.24935	0.13367	1.60925	1.06252	0.0163265	0.0504587	0.0381791	Inactivating
RASGRP4	2.24202	0.134305	1.6141	1.75635	0.0163265	0.00917431	0.0117474	Inactivating
SNW1	2.24202	0.134305	1.61271	1.75635	0.0163265	0.00917431	0.0117474	Inactivating
INTS2	2.24202	0.134305	1.61131	1.75635	0.0163265	0.00917431	0.0117474	Inactivating
SPATA2L	2.24202	0.134305	1.61131	1.75635	0.0163265	0.00917431	0.0117474	Inactivating
HIF1A	2.24202	0.134305	1.60854	1.75635	0.0163265	0.00917431	0.0117474	Inactivating
DIAPH2	2.23913	0.134557	1.61017	0.80401	0.0367347	0.0756881	0.061674	Inactivating
DMD	2.21677	0.136518	1.63223	0.552816	0.106122	0.142202	0.129222	Inactivating
ACE	2.20184	0.137846	1.64669	1.61158	0.00677966	0.0178571	0.0137672	Inactivating
FAM149A	2.20061	0.137956	1.64659	1.07159	0.0326531	0.0389908	0.0367107	Inactivating
SERPINB12	2.19159	0.138766	1.65484	1.17176	0.00816327	0.0458716	0.0323054	Inactivating
EPHA3	2.19079	0.138838	1.65428	0.666089	0.0474576	0.0634921	0.057572	Inactivating
GNAS	2.18668	0.139209	1.65728	1.1378	0.0237288	0.0238095	0.0237797	activating
CHRNA6	2.16593	0.141099	1.67834	1.58064	0.00816327	0.0252294	0.0190896	Inactivating
GABRG1	2.16593	0.141099	1.67834	1.58064	0.00816327	0.0252294	0.0190896	Inactivating
SCML2	2.16593	0.141099	1.67834	1.58064	0.00816327	0.0252294	0.0190896	Inactivating
NBPF15	2.16593	0.141099	1.67405	1.58064	0.00816327	0.0252294	0.0190896	Inactivating
SHANK1	2.16593	0.141099	1.67262	1.58064	0.00816327	0.0252294	0.0190896	Inactivating
REPS2	2.16593	0.141099	1.67119	1.58064	0.00816327	0.0252294	0.0190896	Inactivating
ZRSR2	2.16593	0.141099	1.66977	1.58064	0.00816327	0.0252294	0.0190896	Inactivating
MBD5	2.16593	0.141099	1.66835	1.58064	0.00816327	0.0252294	0.0190896	Inactivating
CYP4V2	2.16088	0.141564	1.67243	1.10845	0.0285714	0.0366972	0.0337739	Inactivating
DMBT1	2.16088	0.141564	1.67101	1.10845	0.0285714	0.0366972	0.0337739	Inactivating
HTT	2.16088	0.141564	1.66959	1.10845	0.0285714	0.0366972	0.0337739	Inactivating
BRD1	2.14726	0.142824	1.68303	1.58683	0.0204082	0.0114679	0.0146843	Inactivating
DSPP	2.14726	0.142824	1.6816	1.58683	0.0204082	0.0114679	0.0146843	Inactivating
ZNF8	2.14726	0.142824	1.68018	1.58683	0.0204082	0.0114679	0.0146843	Inactivating
CPT1B	2.14726	0.142824	1.67876	1.58683	0.0204082	0.0114679	0.0146843	Inactivating
CUBN	2.1469	0.142858	1.67774	0.581281	0.0474576	0.093254	0.0763454	Inactivating
PDZD4	2.13154	0.144296	1.6932	1.96384	0.0122449	0.00458716	0.00734214	Inactivating
ZNF234	2.13154	0.144296	1.69177	1.96384	0.0122449	0.00458716	0.00734214	Inactivating
GRAMD2	2.13154	0.144296	1.69034	1.96384	0.0122449	0.00458716	0.00734214	Inactivating
FAM92B	2.13154	0.144296	1.68892	1.96384	0.0122449	0.00458716	0.00734214	Inactivating
CERCAM	2.13154	0.144296	1.6875	1.96384	0.0122449	0.00458716	0.00734214	Inactivating
ERF	2.13154	0.144296	1.68608	1.96384	0.0122449	0.00458716	0.00734214	Inactivating
TYMP	2.13154	0.144296	1.68608	1.96384	0.0122449	0.00458716	0.00734214	Inactivating
ARL16	2.13154	0.144296	1.68325	1.96384	0.0122449	0.00458716	0.00734214	Inactivating
ARSA	2.13154	0.144296	1.68184	1.96384	0.0122449	0.00458716	0.00734214	Inactivating
SOCS2	2.13154	0.144296	1.68043	1.96384	0.0122449	0.00458716	0.00734214	Inactivating
LONRF1	2.13031	0.144412	1.68038	0.963467	0.0244898	0.0527523	0.0425844	Inactivating
IMPG2	2.12847	0.144585	1.68098	1.15456	0.0244898	0.0344037	0.030837	Inactivating
ACAN	2.12847	0.144585	1.67958	1.15456	0.0244898	0.0344037	0.030837	Inactivating
DGKI	2.12847	0.144585	1.67817	1.15456	0.0244898	0.0344037	0.030837	Inactivating
MLLT10	2.11242	0.146108	1.69444	1.04268	0.0169492	0.0277778	0.0237797	Inactivating
FGFRL1	2.11236	0.146114	1.69309	1.40527	0.0122449	0.0275229	0.0220264	Inactivating
SLC12A5	2.11236	0.146114	1.69168	1.40527	0.0122449	0.0275229	0.0220264	Inactivating
LARP4B	2.11236	0.146114	1.69028	1.40527	0.0122449	0.0275229	0.0220264	Inactivating
C7orf63	2.11236	0.146114	1.68887	1.40527	0.0122449	0.0275229	0.0220264	Inactivating
PDE4D	2.10876	0.146458	1.69145	0.818158	0.0285714	0.0711009	0.0558003	Inactivating
CCDC111	2.10605	0.146717	1.69303	1.21385	0.0204082	0.0321101	0.0279001	Inactivating
SIPA1L1	2.10605	0.146717	1.69163	1.21385	0.0204082	0.0321101	0.0279001	Inactivating
NDST4	2.10605	0.146717	1.69023	1.21385	0.0204082	0.0321101	0.0279001	Inactivating
MOV10L1	2.09896	0.147399	1.69668	1.4618	0.0244898	0.0137615	0.0176211	Inactivating
FBXO8	2.09802	0.14749	1.69632	1.29308	0.0163265	0.0298165	0.0249633	Inactivating
C9orf3	2.09802	0.14749	1.69492	1.29308	0.0163265	0.0298165	0.0249633	Inactivating
IMMP2L	2.09802	0.14749	1.69492	1.29308	0.0163265	0.0298165	0.0249633	Inactivating
EFHC2	2.09802	0.14749	1.69212	1.29308	0.0163265	0.0298165	0.0249633	Inactivating
OGDHL	2.09802	0.14749	1.69073	1.29308	0.0163265	0.0298165	0.0249633	Inactivating
LETM1	2.09802	0.14749	1.68933	1.29308	0.0163265	0.0298165	0.0249633	Inactivating
FAM9A	2.09802	0.14749	1.68794	1.29308	0.0163265	0.0298165	0.0249633	Inactivating
KIAA2022	2.09492	0.14779	1.68998	1.02555	0.0169492	0.031746	0.0262829	Inactivating
KIT	2.09492	0.14779	1.68859	1.02555	0.0169492	0.031746	0.0262829	activating
MX2	2.08369	0.14888	1.69965	1.16466	0.0101695	0.0198413	0.0162703	Inactivating
BACH1	2.08235	0.149011	1.69975	1.2919	0.0326531	0.0183486	0.0234949	Inactivating
TJP2	2.08051	0.149191	1.70041	1.36647	0.0285714	0.016055	0.020558	Inactivating
DOCK8	2.0803	0.149211	1.69925	0.98977	0.0204082	0.0504587	0.0396476	Inactivating
SMARCA2	2.0803	0.149211	1.69785	0.98977	0.0204082	0.0504587	0.0396476	Inactivating
ZNF516	2.08001	0.14924	1.69679	0.781549	0.0163265	0.0825688	0.0587372	Inactivating
SORBS2	2.04339	0.152869	1.73664	0.892329	0.0326531	0.0550459	0.0469897	Inactivating
PLXNA3	2.0395	0.15326	1.73966	1.01806	0.0305085	0.0297619	0.0300375	Inactivating
MTUS2	2.03519	0.153695	1.74317	1.00717	0.0367347	0.0389908	0.0381791	Inactivating
SOX7	2.03488	0.153726	1.7421	1.02277	0.0163265	0.0481651	0.0367107	Inactivating
LAMA1	2.03446	0.153768	1.74116	0.782956	0.0305085	0.0555556	0.0463079	Inactivating
ATP5I	2.02344	0.154888	1.75241	1.85638	0.00408163	0.0206422	0.0146843	Inactivating
EXOSC3	2.02344	0.154888	1.75099	1.85638	0.00408163	0.0206422	0.0146843	Inactivating
LSM1	2.02344	0.154888	1.74957	1.85638	0.00408163	0.0206422	0.0146843	Inactivating
PPM1J	2.02344	0.154888	1.74815	1.85638	0.00408163	0.0206422	0.0146843	Inactivating
MIER3	2.02344	0.154888	1.74673	1.85638	0.00408163	0.0206422	0.0146843	Inactivating
SH3BP2	2.02344	0.154888	1.74673	1.85638	0.00408163	0.0206422	0.0146843	Inactivating
TUBB8	2.02344	0.154888	1.74673	1.85638	0.00408163	0.0206422	0.0146843	Inactivating
C9orf163	2.02344	0.154888	1.74249	1.85638	0.00408163	0.0206422	0.0146843	Inactivating
DDX4	2.02344	0.154888	1.74108	1.85638	0.00408163	0.0206422	0.0146843	Inactivating
ZNF507	2.02344	0.154888	1.74108	1.85638	0.00408163	0.0206422	0.0146843	Inactivating
OR4K5	2.02344	0.154888	1.73827	1.85638	0.00408163	0.0206422	0.0146843	Inactivating
ZMAT4	2.02344	0.154888	1.73827	1.85638	0.00408163	0.0206422	0.0146843	Inactivating
KIF2B	2.02344	0.154888	1.73547	1.85638	0.00408163	0.0206422	0.0146843	Inactivating
STX18	2.02344	0.154888	1.73547	1.85638	0.00408163	0.0206422	0.0146843	Inactivating
WNT2B	2.02344	0.154888	1.73268	1.85638	0.00408163	0.0206422	0.0146843	Inactivating
OR2T2	2.02344	0.154888	1.73128	1.85638	0.00408163	0.0206422	0.0146843	Inactivating
PDZD8	2.02344	0.154888	1.73128	1.85638	0.00408163	0.0206422	0.0146843	Inactivating
POLR1E	2.02344	0.154888	1.73128	1.85638	0.00408163	0.0206422	0.0146843	Inactivating
ASB11	2.02344	0.154888	1.72712	1.85638	0.00408163	0.0206422	0.0146843	Inactivating
CLVS1	2.02344	0.154888	1.72712	1.85638	0.00408163	0.0206422	0.0146843	Inactivating
PRB1	2.02344	0.154888	1.72712	1.85638	0.00408163	0.0206422	0.0146843	Inactivating
TMEM27	2.02344	0.154888	1.72712	1.85638	0.00408163	0.0206422	0.0146843	Inactivating
ADRB3	2.02344	0.154888	1.7216	1.85638	0.00408163	0.0206422	0.0146843	Inactivating
FAM53A	2.02344	0.154888	1.7216	1.85638	0.00408163	0.0206422	0.0146843	Inactivating
KIR3DL2	2.02344	0.154888	1.7216	1.85638	0.00408163	0.0206422	0.0146843	Inactivating
PRPF38B	2.02344	0.154888	1.7216	1.85638	0.00408163	0.0206422	0.0146843	Inactivating
CASKIN1	2.02344	0.154888	1.71611	1.85638	0.00408163	0.0206422	0.0146843	Inactivating
DENND2D	2.02344	0.154888	1.71611	1.85638	0.00408163	0.0206422	0.0146843	Inactivating
XKR3	2.02344	0.154888	1.71338	1.85638	0.00408163	0.0206422	0.0146843	Inactivating
SLCO5A1	2.00675	0.156601	1.73095	1.18374	0.00677966	0.0257937	0.0187735	Inactivating
DNAH10	2.00303	0.156985	1.73382	0.916914	0.0489796	0.043578	0.0455213	Inactivating
GRIN2A	1.9956	0.157756	1.74095	1.06544	0.0122449	0.0458716	0.0337739	Inactivating
XKR6	1.9956	0.157756	1.73957	1.06544	0.0122449	0.0458716	0.0337739	Inactivating
ANGPT2	1.9956	0.157756	1.73819	1.06544	0.0122449	0.0458716	0.0337739	Inactivating
PPP1R3B	1.9956	0.157756	1.73682	1.06544	0.0122449	0.0458716	0.0337739	Inactivating
ALPK2	1.99176	0.158157	1.73985	0.781918	0.0326531	0.0711009	0.0572687	Inactivating
APOB	1.98626	0.158733	1.74481	0.538079	0.0677966	0.093254	0.0838548	Inactivating
ATP10A	1.98471	0.158895	1.74521	0.908197	0.0285714	0.0527523	0.0440529	Inactivating
NDST2	1.97174	0.160264	1.75885	1.71918	0.0163265	0.00688073	0.010279	Inactivating
ELF3	1.97174	0.160264	1.75746	1.71918	0.0163265	0.00688073	0.010279	Inactivating
C17orf75	1.97174	0.160264	1.75608	1.71918	0.0163265	0.00688073	0.010279	Inactivating
TPSAB1	1.97174	0.160264	1.75608	1.71918	0.0163265	0.00688073	0.010279	Inactivating
PM20D2	1.97174	0.160264	1.75332	1.71918	0.0163265	0.00688073	0.010279	Inactivating
MALT1	1.96504	0.160975	1.75972	1.12316	0.00816327	0.043578	0.030837	Inactivating
SERPINB3	1.96504	0.160975	1.75834	1.12316	0.00816327	0.043578	0.030837	Inactivating
FGA	1.94266	0.16338	1.7832	1.07009	0.0285714	0.0344037	0.0323054	Inactivating
ATR	1.92849	0.164923	1.79863	0.927455	0.0244898	0.0504587	0.041116	Inactivating
GRM7	1.92849	0.164923	1.79722	0.927455	0.0244898	0.0504587	0.041116	Inactivating
TRIML1	1.91374	0.166548	1.81351	0.84747	0.0367347	0.0550459	0.0484581	Inactivating
RFX6	1.9053	0.167486	1.82229	1.11376	0.0244898	0.0321101	0.0293686	Inactivating
CHMP2B	1.9053	0.167486	1.82087	1.11376	0.0244898	0.0321101	0.0293686	Inactivating
SLC26A1	1.90485	0.167537	1.82	1.52456	0.00816327	0.0229358	0.0176211	Inactivating
FKSG52	1.90485	0.167537	1.81858	1.52456	0.00816327	0.0229358	0.0176211	Inactivating
FIGF	1.90485	0.167537	1.81716	1.52456	0.00816327	0.0229358	0.0176211	Inactivating
CACNB2	1.90485	0.167537	1.81574	1.52456	0.00816327	0.0229358	0.0176211	Inactivating
AP1S2	1.90485	0.167537	1.81433	1.52456	0.00816327	0.0229358	0.0176211	Inactivating
IPO11	1.90485	0.167537	1.81292	1.52456	0.00816327	0.0229358	0.0176211	Inactivating
TRIM58	1.90485	0.167537	1.81151	1.52456	0.00816327	0.0229358	0.0176211	Inactivating
ELTD1	1.90485	0.167537	1.8101	1.52456	0.00816327	0.0229358	0.0176211	Inactivating
NES	1.90485	0.167537	1.8101	1.52456	0.00816327	0.0229358	0.0176211	Inactivating
PIGA	1.90485	0.167537	1.8101	1.52456	0.00816327	0.0229358	0.0176211	Inactivating
RPS6KA1	1.90485	0.167537	1.8101	1.52456	0.00816327	0.0229358	0.0176211	Inactivating
TSGA10	1.90485	0.167537	1.8101	1.52456	0.00816327	0.0229358	0.0176211	Inactivating
MX1	1.90485	0.167537	1.80309	1.52456	0.00816327	0.0229358	0.0176211	Inactivating
MC5R	1.90485	0.167537	1.8017	1.52456	0.00816327	0.0229358	0.0176211	Inactivating
ZMYM3	1.90485	0.167537	1.8017	1.52456	0.00816327	0.0229358	0.0176211	Inactivating
PDE6B	1.90485	0.167537	1.79892	1.52456	0.00816327	0.0229358	0.0176211	Inactivating
PCNXL3	1.90485	0.167537	1.79753	1.52456	0.00816327	0.0229358	0.0176211	Inactivating
ACSM2B	1.90485	0.167537	1.79614	1.52456	0.00816327	0.0229358	0.0176211	Inactivating
PIR	1.90485	0.167537	1.79476	1.52456	0.00816327	0.0229358	0.0176211	Inactivating
SYT4	1.90485	0.167537	1.79476	1.52456	0.00816327	0.0229358	0.0176211	Inactivating
STAR	1.90485	0.167537	1.792	1.52456	0.00816327	0.0229358	0.0176211	Inactivating
HNRNPL	1.90485	0.167537	1.79062	1.52456	0.00816327	0.0229358	0.0176211	Inactivating
TXNIP	1.90485	0.167537	1.79062	1.52456	0.00816327	0.0229358	0.0176211	Inactivating
VCX2	1.90485	0.167537	1.78787	1.52456	0.00816327	0.0229358	0.0176211	Inactivating
PIK3R4	1.90485	0.167537	1.7865	1.52456	0.00816327	0.0229358	0.0176211	Inactivating
CARD11	1.9004	0.168033	1.79043	0.810612	0.0237288	0.0436508	0.0362954	activating
UBE2O	1.88805	0.169422	1.80384	1.54773	0.0204082	0.00917431	0.0132159	Inactivating
TTLL8	1.88805	0.169422	1.80246	1.54773	0.0204082	0.00917431	0.0132159	Inactivating
LRP2BP	1.87676	0.170702	1.81469	1.17021	0.0204082	0.0298165	0.0264317	Inactivating
PARP4	1.87676	0.170702	1.81469	1.17021	0.0204082	0.0298165	0.0264317	Inactivating
KIAA0020	1.87676	0.170702	1.81192	1.17021	0.0204082	0.0298165	0.0264317	Inactivating
MSH4	1.87676	0.170702	1.81054	1.17021	0.0204082	0.0298165	0.0264317	Inactivating
GOLGA3	1.87676	0.170702	1.80916	1.17021	0.0204082	0.0298165	0.0264317	Inactivating
ZNF41	1.87676	0.170702	1.80916	1.17021	0.0204082	0.0298165	0.0264317	Inactivating
C4orf47	1.87676	0.170702	1.80641	1.17021	0.0204082	0.0298165	0.0264317	Inactivating
CLDN22	1.87676	0.170702	1.80503	1.17021	0.0204082	0.0298165	0.0264317	Inactivating
MLF1IP	1.87676	0.170702	1.80503	1.17021	0.0204082	0.0298165	0.0264317	Inactivating
DST	1.87552	0.170844	1.80379	0.539519	0.0711864	0.0912698	0.0838548	Inactivating
MAP3K5	1.86899	0.17159	1.81029	1.19489	0.0367347	0.0183486	0.0249633	Inactivating
DNAJC1	1.86522	0.172024	1.81349	1.35427	0.0122449	0.0252294	0.020558	Inactivating
GNL3L	1.86522	0.172024	1.81211	1.35427	0.0122449	0.0252294	0.020558	Inactivating
PCDH18	1.86522	0.172024	1.81074	1.35427	0.0122449	0.0252294	0.020558	Inactivating
ZMYND11	1.86522	0.172024	1.81074	1.35427	0.0122449	0.0252294	0.020558	Inactivating
ABCB5	1.86522	0.172024	1.808	1.35427	0.0122449	0.0252294	0.020558	Inactivating
FAM9B	1.86522	0.172024	1.808	1.35427	0.0122449	0.0252294	0.020558	Inactivating
ZFAT	1.86522	0.172024	1.808	1.35427	0.0122449	0.0252294	0.020558	Inactivating
C9orf131	1.86522	0.172024	1.80391	1.35427	0.0122449	0.0252294	0.020558	Inactivating
UHRF2	1.86522	0.172024	1.80391	1.35427	0.0122449	0.0252294	0.020558	Inactivating
PAX1	1.86522	0.172024	1.8012	1.35427	0.0122449	0.0252294	0.020558	Inactivating
USP54	1.86522	0.172024	1.79984	1.35427	0.0122449	0.0252294	0.020558	Inactivating
GMDS	1.86522	0.172024	1.79849	1.35427	0.0122449	0.0252294	0.020558	Inactivating
TMEM175	1.86522	0.172024	1.79714	1.35427	0.0122449	0.0252294	0.020558	Inactivating
SUPT6H	1.86099	0.172511	1.80087	1.2461	0.0163265	0.0275229	0.0234949	Inactivating
TMTC3	1.86099	0.172511	1.79952	1.2461	0.0163265	0.0275229	0.0234949	Inactivating
GPATCH8	1.86099	0.172511	1.79817	1.2461	0.0163265	0.0275229	0.0234949	Inactivating
KIF16B	1.86099	0.172511	1.79682	1.2461	0.0163265	0.0275229	0.0234949	Inactivating
TENM3	1.86099	0.172511	1.79548	1.2461	0.0163265	0.0275229	0.0234949	Inactivating
HACL1	1.86099	0.172511	1.79414	1.2461	0.0163265	0.0275229	0.0234949	Inactivating
PPP1R3A	1.86099	0.172511	1.79279	1.2461	0.0163265	0.0275229	0.0234949	Inactivating
UNC13B	1.86099	0.172511	1.79146	1.2461	0.0163265	0.0275229	0.0234949	Inactivating
FLT4	1.86099	0.172511	1.79012	1.2461	0.0163265	0.0275229	0.0234949	Inactivating
ALDH4A1	1.85056	0.173718	1.8013	1.92789	0.0122449	0.00229358	0.00587372	Inactivating
ELL3	1.85056	0.173718	1.79996	1.92789	0.0122449	0.00229358	0.00587372	Inactivating
CCPG1	1.84709	0.174122	1.80281	1.25336	0.0326531	0.016055	0.0220264	Inactivating
PLXNA1	1.82595	0.176606	1.82717	0.981026	0.0163265	0.0458716	0.0352423	Inactivating
GRIK2	1.82595	0.176606	1.82581	0.981026	0.0163265	0.0458716	0.0352423	Inactivating
ATRX	1.81001	0.178507	1.84409	0.731171	0.0372881	0.047619	0.0438048	Inactivating
SPAG11A	1.7817	0.181941	1.87816	1.01967	0.0122449	0.043578	0.0323054	Inactivating
KBTBD11	1.7817	0.181941	1.87677	1.01967	0.0122449	0.043578	0.0323054	Inactivating
MYO18B	1.7817	0.181941	1.87538	1.01967	0.0122449	0.043578	0.0323054	Inactivating
DEFB4A	1.7817	0.181941	1.87399	1.01967	0.0122449	0.043578	0.0323054	Inactivating
BRCA2	1.774	0.182887	1.88235	0.713223	0.0271186	0.0456349	0.0387985	Inactivating
F13B	1.76223	0.184346	1.89596	1.10937	0.00677966	0.0277778	0.020025	Inactivating
IDI1	1.74526	0.186474	1.91642	1.78627	0.00408163	0.0183486	0.0132159	Inactivating
CRIPAK	1.74526	0.186474	1.91501	1.78627	0.00408163	0.0183486	0.0132159	Inactivating
JPH1	1.74526	0.186474	1.91359	1.78627	0.00408163	0.0183486	0.0132159	Inactivating
RASGRP1	1.74526	0.186474	1.91218	1.78627	0.00408163	0.0183486	0.0132159	Inactivating
NCAPG	1.74526	0.186474	1.91077	1.78627	0.00408163	0.0183486	0.0132159	Inactivating
VCP	1.74526	0.186474	1.90937	1.78627	0.00408163	0.0183486	0.0132159	Inactivating
OR5M8	1.74526	0.186474	1.90796	1.78627	0.00408163	0.0183486	0.0132159	Inactivating
PTPN3	1.74526	0.186474	1.90796	1.78627	0.00408163	0.0183486	0.0132159	Inactivating
LRRC8A	1.74526	0.186474	1.90516	1.78627	0.00408163	0.0183486	0.0132159	Inactivating
SLC6A17	1.74526	0.186474	1.90516	1.78627	0.00408163	0.0183486	0.0132159	Inactivating
LUC7L3	1.74526	0.186474	1.90236	1.78627	0.00408163	0.0183486	0.0132159	Inactivating
FTSJD1	1.74526	0.186474	1.90097	1.78627	0.00408163	0.0183486	0.0132159	Inactivating
MRPS30	1.74526	0.186474	1.90097	1.78627	0.00408163	0.0183486	0.0132159	Inactivating
SLC44A5	1.74526	0.186474	1.90097	1.78627	0.00408163	0.0183486	0.0132159	Inactivating
ZNF33B	1.74526	0.186474	1.90097	1.78627	0.00408163	0.0183486	0.0132159	Inactivating
RAB3C	1.74526	0.186474	1.89541	1.78627	0.00408163	0.0183486	0.0132159	Inactivating
SIGLEC9	1.74526	0.186474	1.89541	1.78627	0.00408163	0.0183486	0.0132159	Inactivating
TAF2	1.74526	0.186474	1.89541	1.78627	0.00408163	0.0183486	0.0132159	Inactivating
ZNF280A	1.74526	0.186474	1.89541	1.78627	0.00408163	0.0183486	0.0132159	Inactivating
ALCAM	1.74526	0.186474	1.88988	1.78627	0.00408163	0.0183486	0.0132159	Inactivating
SLBP	1.74526	0.186474	1.88851	1.78627	0.00408163	0.0183486	0.0132159	Inactivating
WDR37	1.74526	0.186474	1.88851	1.78627	0.00408163	0.0183486	0.0132159	Inactivating
C1QTNF7	1.74526	0.186474	1.88576	1.78627	0.00408163	0.0183486	0.0132159	Inactivating
EBF3	1.74526	0.186474	1.88576	1.78627	0.00408163	0.0183486	0.0132159	Inactivating
HAS2	1.74526	0.186474	1.88576	1.78627	0.00408163	0.0183486	0.0132159	Inactivating
KCTD1	1.74526	0.186474	1.88576	1.78627	0.00408163	0.0183486	0.0132159	Inactivating
RNF4	1.74526	0.186474	1.88576	1.78627	0.00408163	0.0183486	0.0132159	Inactivating
SLC2A2	1.74526	0.186474	1.88576	1.78627	0.00408163	0.0183486	0.0132159	Inactivating
FAM19A2	1.74526	0.186474	1.87757	1.78627	0.00408163	0.0183486	0.0132159	Inactivating
ITGB2	1.74526	0.186474	1.87757	1.78627	0.00408163	0.0183486	0.0132159	Inactivating
KCNA10	1.74526	0.186474	1.87757	1.78627	0.00408163	0.0183486	0.0132159	Inactivating
AXIN1	1.74526	0.186474	1.8735	1.78627	0.00408163	0.0183486	0.0132159	Inactivating
C4orf50	1.74526	0.186474	1.8735	1.78627	0.00408163	0.0183486	0.0132159	Inactivating
ROR1	1.74526	0.186474	1.8735	1.78627	0.00408163	0.0183486	0.0132159	Inactivating
SPOPL	1.74526	0.186474	1.8735	1.78627	0.00408163	0.0183486	0.0132159	Inactivating
DBT	1.74526	0.186474	1.8681	1.78627	0.00408163	0.0183486	0.0132159	Inactivating
MAGEB17	1.74526	0.186474	1.8681	1.78627	0.00408163	0.0183486	0.0132159	Inactivating
SNTB1	1.74526	0.186474	1.8681	1.78627	0.00408163	0.0183486	0.0132159	Inactivating
CPT1C	1.74526	0.186474	1.86407	1.78627	0.00408163	0.0183486	0.0132159	Inactivating
EIF4EBP1	1.74526	0.186474	1.86407	1.78627	0.00408163	0.0183486	0.0132159	Inactivating
C8orf86	1.74526	0.186474	1.86139	1.78627	0.00408163	0.0183486	0.0132159	Inactivating
GABRE	1.74526	0.186474	1.86139	1.78627	0.00408163	0.0183486	0.0132159	Inactivating
ZFP37	1.74526	0.186474	1.86139	1.78627	0.00408163	0.0183486	0.0132159	Inactivating
RNF115	1.74526	0.186474	1.85739	1.78627	0.00408163	0.0183486	0.0132159	Inactivating
SLC1A1	1.74526	0.186474	1.85606	1.78627	0.00408163	0.0183486	0.0132159	Inactivating
SPATA6L	1.74526	0.186474	1.85606	1.78627	0.00408163	0.0183486	0.0132159	Inactivating
SPON2	1.74526	0.186474	1.85606	1.78627	0.00408163	0.0183486	0.0132159	Inactivating
TCEB3C	1.74526	0.186474	1.85208	1.78627	0.00408163	0.0183486	0.0132159	Inactivating
AKR1C2	1.74526	0.186474	1.85076	1.78627	0.00408163	0.0183486	0.0132159	Inactivating
KCNIP4	1.74466	0.18655	1.8502	1.07192	0.00816327	0.0412844	0.0293686	Inactivating
ZFHX4	1.73775	0.187424	1.85755	0.472568	0.0576271	0.0972222	0.0826033	Inactivating
AKAP9	1.73687	0.187536	1.85733	0.815938	0.0163265	0.0619266	0.0455213	Inactivating
SBF1	1.72953	0.188471	1.86526	1.02925	0.0285714	0.0321101	0.030837	Inactivating
EPHA6	1.71872	0.189858	1.87765	1.14779	0.00408163	0.0389908	0.0264317	Inactivating
FMNL1	1.70436	0.191719	1.89471	1.6787	0.0163265	0.00458716	0.00881057	Inactivating
SCO2	1.70436	0.191719	1.89336	1.6787	0.0163265	0.00458716	0.00881057	Inactivating
JUND	1.70436	0.191719	1.89202	1.6787	0.0163265	0.00458716	0.00881057	Inactivating
SAMD4A	1.70436	0.191719	1.89068	1.6787	0.0163265	0.00458716	0.00881057	Inactivating
PML	1.70436	0.191719	1.88934	1.6787	0.0163265	0.00458716	0.00881057	Inactivating
RPGR	1.68734	0.193952	1.90998	1.07012	0.0244898	0.0298165	0.0279001	Inactivating
SHQ1	1.68734	0.193952	1.90998	1.07012	0.0244898	0.0298165	0.0279001	Inactivating
CASP3	1.68734	0.193952	1.90728	1.07012	0.0244898	0.0298165	0.0279001	Inactivating
ANKRD37	1.68734	0.193952	1.90593	1.07012	0.0244898	0.0298165	0.0279001	Inactivating
C10orf12	1.65277	0.198582	1.95006	1.12331	0.0204082	0.0275229	0.0249633	Inactivating
RSF1	1.65277	0.198582	1.94868	1.12331	0.0204082	0.0275229	0.0249633	Inactivating
C3orf38	1.65277	0.198582	1.9473	1.12331	0.0204082	0.0275229	0.0249633	Inactivating
PHEX	1.65277	0.198582	1.94593	1.12331	0.0204082	0.0275229	0.0249633	Inactivating
SHROOM3	1.65277	0.198582	1.94593	1.12331	0.0204082	0.0275229	0.0249633	Inactivating
SLC25A4	1.65277	0.198582	1.94319	1.12331	0.0204082	0.0275229	0.0249633	Inactivating
KCNH4	1.64878	0.199125	1.94714	1.46298	0.00816327	0.0206422	0.0161527	Inactivating
SYNJ1	1.64878	0.199125	1.94577	1.46298	0.00816327	0.0206422	0.0161527	Inactivating
GK2	1.64878	0.199125	1.9444	1.46298	0.00816327	0.0206422	0.0161527	Inactivating
EPHA10	1.64878	0.199125	1.94304	1.46298	0.00816327	0.0206422	0.0161527	Inactivating
CTBP1	1.64878	0.199125	1.94168	1.46298	0.00816327	0.0206422	0.0161527	Inactivating
KCND3	1.64878	0.199125	1.94168	1.46298	0.00816327	0.0206422	0.0161527	Inactivating
CSF2RB	1.64878	0.199125	1.93896	1.46298	0.00816327	0.0206422	0.0161527	Inactivating
F13A1	1.64878	0.199125	1.9376	1.46298	0.00816327	0.0206422	0.0161527	Inactivating
LILRA2	1.64878	0.199125	1.9376	1.46298	0.00816327	0.0206422	0.0161527	Inactivating
MYL5	1.64878	0.199125	1.9376	1.46298	0.00816327	0.0206422	0.0161527	Inactivating
SLC38A9	1.64878	0.199125	1.9376	1.46298	0.00816327	0.0206422	0.0161527	Inactivating
ZNF264	1.64878	0.199125	1.9376	1.46298	0.00816327	0.0206422	0.0161527	Inactivating
BRPF3	1.64878	0.199125	1.93084	1.46298	0.00816327	0.0206422	0.0161527	Inactivating
GPHN	1.64878	0.199125	1.93084	1.46298	0.00816327	0.0206422	0.0161527	Inactivating
OR2T6	1.64878	0.199125	1.93084	1.46298	0.00816327	0.0206422	0.0161527	Inactivating
PFKL	1.64878	0.199125	1.93084	1.46298	0.00816327	0.0206422	0.0161527	Inactivating
PACS1	1.64878	0.199125	1.92547	1.46298	0.00816327	0.0206422	0.0161527	Inactivating
C2CD2	1.64878	0.199125	1.92413	1.46298	0.00816327	0.0206422	0.0161527	Inactivating
OR2L3	1.64878	0.199125	1.92413	1.46298	0.00816327	0.0206422	0.0161527	Inactivating
HTR1E	1.64878	0.199125	1.92146	1.46298	0.00816327	0.0206422	0.0161527	Inactivating
DRP2	1.64878	0.199125	1.92013	1.46298	0.00816327	0.0206422	0.0161527	Inactivating
MFSD10	1.64878	0.199125	1.9188	1.46298	0.00816327	0.0206422	0.0161527	Inactivating
RNF212	1.64878	0.199125	1.9188	1.46298	0.00816327	0.0206422	0.0161527	Inactivating
PLCB3	1.64878	0.199125	1.91614	1.46298	0.00816327	0.0206422	0.0161527	Inactivating
AKNAD1	1.64878	0.199125	1.91482	1.46298	0.00816327	0.0206422	0.0161527	Inactivating
STX19	1.64878	0.199125	1.91482	1.46298	0.00816327	0.0206422	0.0161527	Inactivating
HDHD1	1.64878	0.199125	1.91217	1.46298	0.00816327	0.0206422	0.0161527	Inactivating
URB2	1.64878	0.199125	1.91217	1.46298	0.00816327	0.0206422	0.0161527	Inactivating
VCX	1.64878	0.199125	1.91217	1.46298	0.00816327	0.0206422	0.0161527	Inactivating
VCX3A	1.64878	0.199125	1.91217	1.46298	0.00816327	0.0206422	0.0161527	Inactivating
LCA5	1.64878	0.199125	1.90691	1.46298	0.00816327	0.0206422	0.0161527	Inactivating
PRPF40B	1.64878	0.199125	1.90559	1.46298	0.00816327	0.0206422	0.0161527	Inactivating
WFS1	1.64878	0.199125	1.90559	1.46298	0.00816327	0.0206422	0.0161527	Inactivating
MKL1	1.64878	0.199125	1.90298	1.46298	0.00816327	0.0206422	0.0161527	Inactivating
TFE3	1.63829	0.200561	1.91538	0.980575	0.0135593	0.0257937	0.0212766	Inactivating
KLHDC7B	1.63231	0.201384	1.92192	1.50503	0.0204082	0.00688073	0.0117474	Inactivating
FARP1	1.6293	0.201799	1.92457	1.1953	0.0163265	0.0252294	0.0220264	Inactivating
SCN4A	1.6293	0.201799	1.92325	1.1953	0.0163265	0.0252294	0.0220264	Inactivating
TNC	1.6293	0.201799	1.92325	1.1953	0.0163265	0.0252294	0.0220264	Inactivating
SPCS3	1.6293	0.201799	1.92062	1.1953	0.0163265	0.0252294	0.0220264	Inactivating
RS1	1.6293	0.201799	1.9193	1.1953	0.0163265	0.0252294	0.0220264	Inactivating
SCLT1	1.6293	0.201799	1.9193	1.1953	0.0163265	0.0252294	0.0220264	Inactivating
NAV1	1.6293	0.201799	1.91668	1.1953	0.0163265	0.0252294	0.0220264	Inactivating
CLDN24	1.6293	0.201799	1.91537	1.1953	0.0163265	0.0252294	0.0220264	Inactivating
COL4A1	1.6293	0.201799	1.91537	1.1953	0.0163265	0.0252294	0.0220264	Inactivating
FAM65B	1.6293	0.201799	1.91537	1.1953	0.0163265	0.0252294	0.0220264	Inactivating
AGA	1.6293	0.201799	1.91146	1.1953	0.0163265	0.0252294	0.0220264	Inactivating
DTNA	1.6293	0.201799	1.91016	1.1953	0.0163265	0.0252294	0.0220264	Inactivating
ZNF440	1.6293	0.201799	1.91016	1.1953	0.0163265	0.0252294	0.0220264	Inactivating
SEMA6D	1.6293	0.201799	1.90756	1.1953	0.0163265	0.0252294	0.0220264	Inactivating
IL31RA	1.62336	0.202624	1.91406	1.29872	0.0122449	0.0229358	0.0190896	Inactivating
MORC3	1.62336	0.202624	1.91276	1.29872	0.0122449	0.0229358	0.0190896	Inactivating
RBM33	1.62336	0.202624	1.91276	1.29872	0.0122449	0.0229358	0.0190896	Inactivating
TARDBP	1.62336	0.202624	1.91016	1.29872	0.0122449	0.0229358	0.0190896	Inactivating
DDHD2	1.62336	0.202624	1.90887	1.29872	0.0122449	0.0229358	0.0190896	Inactivating
ZNF732	1.62336	0.202624	1.90758	1.29872	0.0122449	0.0229358	0.0190896	Inactivating
KIAA1024	1.62336	0.202624	1.90629	1.29872	0.0122449	0.0229358	0.0190896	Inactivating
RICTOR	1.62336	0.202624	1.90629	1.29872	0.0122449	0.0229358	0.0190896	Inactivating
SIPA1L3	1.62336	0.202624	1.90371	1.29872	0.0122449	0.0229358	0.0190896	Inactivating
SSFA2	1.62336	0.202624	1.90242	1.29872	0.0122449	0.0229358	0.0190896	Inactivating
IL33	1.62336	0.202624	1.90114	1.29872	0.0122449	0.0229358	0.0190896	Inactivating
KCNA6	1.62336	0.202624	1.90114	1.29872	0.0122449	0.0229358	0.0190896	Inactivating
PLXND1	1.62336	0.202624	1.90114	1.29872	0.0122449	0.0229358	0.0190896	Inactivating
ABLIM2	1.62336	0.202624	1.8973	1.29872	0.0122449	0.0229358	0.0190896	Inactivating
HIST1H1B	1.62336	0.202624	1.89602	1.29872	0.0122449	0.0229358	0.0190896	Inactivating
KIF13A	1.62336	0.202624	1.89602	1.29872	0.0122449	0.0229358	0.0190896	Inactivating
LDB2	1.62336	0.202624	1.89602	1.29872	0.0122449	0.0229358	0.0190896	Inactivating
TNS3	1.62336	0.202624	1.8922	1.29872	0.0122449	0.0229358	0.0190896	Inactivating
ADCY5	1.62336	0.202624	1.89093	1.29872	0.0122449	0.0229358	0.0190896	Inactivating
GABRQ	1.62336	0.202624	1.88967	1.29872	0.0122449	0.0229358	0.0190896	Inactivating
SPAG11B	1.62301	0.202673	1.88885	0.937082	0.0163265	0.043578	0.0337739	Inactivating
FRMPD4	1.62301	0.202673	1.88758	0.937082	0.0163265	0.043578	0.0337739	Inactivating
MCM3AP	1.62301	0.202673	1.88758	0.937082	0.0163265	0.043578	0.0337739	Inactivating
PRSS55	1.62301	0.202673	1.88506	0.937082	0.0163265	0.043578	0.0337739	Inactivating
ONECUT2	1.62301	0.202673	1.8838	0.937082	0.0163265	0.043578	0.0337739	Inactivating
COL1A2	1.62301	0.202673	1.88254	0.937082	0.0135593	0.0376984	0.028786	Inactivating
UNC5D	1.6184	0.203315	1.88724	0.666511	0.0271186	0.0555556	0.0450563	Inactivating
BAI3	1.61356	0.203992	1.89226	0.688982	0.0408163	0.0688073	0.0587372	Inactivating
SYNE1	1.60945	0.20457	1.89636	0.321995	0.155932	0.204365	0.186483	Inactivating
TRPM3	1.60232	0.205575	1.90441	0.835763	0.0285714	0.0481651	0.041116	Inactivating
ARHGEF11	1.60083	0.205786	1.90509	1.28428	0.0285714	0.0114679	0.0176211	Inactivating
TRIM9	1.60083	0.205786	1.90383	1.28428	0.0285714	0.0114679	0.0176211	Inactivating
ELP4	1.58888	0.207486	1.91828	1.11131	0.00677966	0.0178571	0.0137672	Inactivating
NRAS	1.5804	0.208703	1.92825	1.82351	0.00338983	0.00595238	0.00500626	activating
MYOM2	1.57698	0.209197	1.93153	0.72506	0.0285714	0.0642202	0.051395	Inactivating
SKP2	1.5769	0.209208	1.93035	0.73398	0.0489796	0.0550459	0.0528634	activating
DEFA1	1.57413	0.209608	1.93276	0.971365	0.0122449	0.0412844	0.030837	Inactivating
DEFA1B	1.57413	0.209608	1.93276	0.971365	0.0122449	0.0412844	0.030837	Inactivating
DEFA3	1.57413	0.209608	1.93276	0.971365	0.0122449	0.0412844	0.030837	Inactivating
DEFA5	1.57413	0.209608	1.93276	0.971365	0.0122449	0.0412844	0.030837	Inactivating
DEFB103A	1.57413	0.209608	1.93276	0.971365	0.0122449	0.0412844	0.030837	Inactivating
DEFB103B	1.57413	0.209608	1.93276	0.971365	0.0122449	0.0412844	0.030837	Inactivating
DEFB104B	1.57413	0.209608	1.93276	0.971365	0.0122449	0.0412844	0.030837	Inactivating
DEFB105A	1.57413	0.209608	1.93276	0.971365	0.0122449	0.0412844	0.030837	Inactivating
DEFB105B	1.57413	0.209608	1.93276	0.971365	0.0122449	0.0412844	0.030837	Inactivating
DEFB106A	1.57413	0.209608	1.93276	0.971365	0.0122449	0.0412844	0.030837	Inactivating
DEFB106B	1.57413	0.209608	1.93276	0.971365	0.0122449	0.0412844	0.030837	Inactivating
DEFB107A	1.57413	0.209608	1.93276	0.971365	0.0122449	0.0412844	0.030837	Inactivating
DEFB107B	1.57413	0.209608	1.93276	0.971365	0.0122449	0.0412844	0.030837	Inactivating
DEFB4B	1.57413	0.209608	1.93276	0.971365	0.0122449	0.0412844	0.030837	Inactivating
LRLE1	1.57413	0.209608	1.93276	0.971365	0.0122449	0.0412844	0.030837	Inactivating
ZNF705B	1.57413	0.209608	1.93276	0.971365	0.0122449	0.0412844	0.030837	Inactivating
ZNF705G	1.57413	0.209608	1.93276	0.971365	0.0122449	0.0412844	0.030837	Inactivating
DEFA4	1.57413	0.209608	1.91121	0.971365	0.0122449	0.0412844	0.030837	Inactivating
DEFB1	1.57413	0.209608	1.90996	0.971365	0.0122449	0.0412844	0.030837	Inactivating
CLDN23	1.57413	0.209608	1.90871	0.971365	0.0122449	0.0412844	0.030837	Inactivating
C8orf74	1.57413	0.209608	1.90746	0.971365	0.0122449	0.0412844	0.030837	Inactivating
BLK	1.57413	0.209608	1.90621	0.971365	0.0122449	0.0412844	0.030837	Inactivating
GLDC	1.57413	0.209608	1.90497	0.971365	0.0122449	0.0412844	0.030837	Inactivating
HR	1.57413	0.209608	1.90497	0.971365	0.0122449	0.0412844	0.030837	activating
LZTS1	1.57413	0.209608	1.90248	0.971365	0.0122449	0.0412844	0.030837	Inactivating
MED1	1.55939	0.211755	1.92071	0.882048	0.0372881	0.0238095	0.028786	activating
NALCN	1.55607	0.212242	1.92388	0.778854	0.0163265	0.059633	0.0440529	Inactivating
RYR2	1.54328	0.214131	1.93973	0.47607	0.0979592	0.12844	0.117474	Inactivating
KIAA1217	1.5416	0.21438	1.94072	0.850124	0.0244898	0.0458716	0.0381791	Inactivating
PINX1	1.5416	0.21438	1.93946	0.850124	0.0244898	0.0458716	0.0381791	Inactivating
GRID2	1.5416	0.21438	1.9382	0.850124	0.0244898	0.0458716	0.0381791	Inactivating
ANKRD11	1.5416	0.21438	1.93694	0.850124	0.0244898	0.0458716	0.0381791	Inactivating
KNDC1	1.53784	0.21494	1.94074	0.869608	0.020339	0.031746	0.0275344	Inactivating
MAPK4	1.53102	0.215959	1.94868	1.01772	0.00816327	0.0389908	0.0279001	Inactivating
KIAA1432	1.53102	0.215959	1.94741	1.01772	0.00816327	0.0389908	0.0279001	Inactivating
TRHDE	1.53102	0.215959	1.94615	1.01772	0.00816327	0.0389908	0.0279001	Inactivating
MYH15	1.52198	0.217319	1.95714	0.985583	0.0285714	0.0298165	0.0293686	Inactivating
PLCL2	1.52198	0.217319	1.95587	0.985583	0.0285714	0.0298165	0.0293686	Inactivating
CBL	1.51937	0.217714	1.95816	1.76279	0.00338983	0.00992063	0.00750939	activating
TET2	1.50711	0.21958	1.97366	0.792612	0.020339	0.0257937	0.0237797	Inactivating
ATP1A1	1.49672	0.221177	1.98674	1.08473	0.00408163	0.0366972	0.0249633	Inactivating
TNR	1.49672	0.221177	1.98546	1.08473	0.00408163	0.0366972	0.0249633	Inactivating
CCDC108	1.49375	0.221636	1.98829	0.874602	0.0408163	0.0344037	0.0367107	Inactivating
BRWD1	1.49375	0.221636	1.98701	0.874602	0.0408163	0.0344037	0.0367107	Inactivating
CDADC1	1.48896	0.222378	1.99238	0.905838	0.0169492	0.0257937	0.0225282	Inactivating
TEX15	1.4876	0.222589	1.99298	0.66928	0.0372881	0.047619	0.0438048	Inactivating
FDFT1	1.48286	0.223327	1.99831	0.868005	0.0204082	0.043578	0.0352423	Inactivating
KIAA1430	1.47513	0.224538	2.00785	1.02321	0.0244898	0.0275229	0.0264317	Inactivating
SPEF2	1.47513	0.224538	2.00655	1.02321	0.0244898	0.0275229	0.0264317	Inactivating
POU1F1	1.47513	0.224538	2.00527	1.02321	0.0244898	0.0275229	0.0264317	Inactivating
PDHA2	1.47513	0.224538	2.00398	1.02321	0.0244898	0.0275229	0.0264317	Inactivating
SERPINE1	1.47206	0.225022	2.00701	1.70749	0.00408163	0.016055	0.0117474	Inactivating
SESTD1	1.47206	0.225022	2.00572	1.70749	0.00408163	0.016055	0.0117474	Inactivating
KRT4	1.47206	0.225022	2.00444	1.70749	0.00408163	0.016055	0.0117474	Inactivating
BTN3A2	1.47206	0.225022	2.00315	1.70749	0.00408163	0.016055	0.0117474	Inactivating
PLEKHA2	1.47206	0.225022	2.00315	1.70749	0.00408163	0.016055	0.0117474	Inactivating
AMPD2	1.47206	0.225022	2.00059	1.70749	0.00408163	0.016055	0.0117474	Inactivating
C8orf34	1.47206	0.225022	1.99931	1.70749	0.00408163	0.016055	0.0117474	Inactivating
LRP10	1.47206	0.225022	1.99931	1.70749	0.00408163	0.016055	0.0117474	Inactivating
OC90	1.47206	0.225022	1.99931	1.70749	0.00408163	0.016055	0.0117474	Inactivating
CORIN	1.47206	0.225022	1.99549	1.70749	0.00408163	0.016055	0.0117474	Inactivating
KRT12	1.47206	0.225022	1.99549	1.70749	0.00408163	0.016055	0.0117474	Inactivating
PTDSS1	1.47206	0.225022	1.99549	1.70749	0.00408163	0.016055	0.0117474	Inactivating
CHST9	1.47206	0.225022	1.99168	1.70749	0.00408163	0.016055	0.0117474	Inactivating
CNGA2	1.47206	0.225022	1.99168	1.70749	0.00408163	0.016055	0.0117474	Inactivating
PRLR	1.47206	0.225022	1.99168	1.70749	0.00408163	0.016055	0.0117474	Inactivating
CCDC96	1.47206	0.225022	1.98788	1.70749	0.00408163	0.016055	0.0117474	Inactivating
DOK7	1.47206	0.225022	1.98788	1.70749	0.00408163	0.016055	0.0117474	Inactivating
GPR61	1.47206	0.225022	1.98788	1.70749	0.00408163	0.016055	0.0117474	Inactivating
NPC1	1.47206	0.225022	1.98788	1.70749	0.00408163	0.016055	0.0117474	Inactivating
OR7A5	1.47206	0.225022	1.98788	1.70749	0.00408163	0.016055	0.0117474	Inactivating
UVSSA	1.47206	0.225022	1.98788	1.70749	0.00408163	0.016055	0.0117474	Inactivating
ZFP91	1.47206	0.225022	1.98788	1.70749	0.00408163	0.016055	0.0117474	Inactivating
EMILIN1	1.47206	0.225022	1.97908	1.70749	0.00408163	0.016055	0.0117474	Inactivating
OR4D11	1.47206	0.225022	1.97908	1.70749	0.00408163	0.016055	0.0117474	Inactivating
PLEKHA5	1.47206	0.225022	1.97908	1.70749	0.00408163	0.016055	0.0117474	Inactivating
STXBP3	1.47206	0.225022	1.97908	1.70749	0.00408163	0.016055	0.0117474	Inactivating
TAPT1	1.47206	0.225022	1.97908	1.70749	0.00408163	0.016055	0.0117474	Inactivating
BCL2L13	1.47206	0.225022	1.97284	1.70749	0.00408163	0.016055	0.0117474	Inactivating
GPR123	1.47206	0.225022	1.97284	1.70749	0.00408163	0.016055	0.0117474	Inactivating
HHIP	1.47206	0.225022	1.97284	1.70749	0.00408163	0.016055	0.0117474	Inactivating
GAPT	1.47206	0.225022	1.96912	1.70749	0.00408163	0.016055	0.0117474	Inactivating
OR5F1	1.47206	0.225022	1.96912	1.70749	0.00408163	0.016055	0.0117474	Inactivating
PTF1A	1.47206	0.225022	1.96912	1.70749	0.00408163	0.016055	0.0117474	Inactivating
IGSF5	1.47206	0.225022	1.96541	1.70749	0.00408163	0.016055	0.0117474	Inactivating
PSD4	1.47206	0.225022	1.96541	1.70749	0.00408163	0.016055	0.0117474	Inactivating
ZIK1	1.47206	0.225022	1.96541	1.70749	0.00408163	0.016055	0.0117474	Inactivating
ZNF703	1.47206	0.225022	1.96541	1.70749	0.00408163	0.016055	0.0117474	Inactivating
ZZZ3	1.47206	0.225022	1.96541	1.70749	0.00408163	0.016055	0.0117474	Inactivating
AGPAT2	1.47206	0.225022	1.95925	1.70749	0.00408163	0.016055	0.0117474	Inactivating
HSPB3	1.47206	0.225022	1.95925	1.70749	0.00408163	0.016055	0.0117474	Inactivating
NAP1L2	1.47206	0.225022	1.95925	1.70749	0.00408163	0.016055	0.0117474	Inactivating
AGPAT6	1.47206	0.225022	1.95558	1.70749	0.00408163	0.016055	0.0117474	Inactivating
XPNPEP3	1.47206	0.225022	1.95436	1.70749	0.00408163	0.016055	0.0117474	Inactivating
CHST6	1.47206	0.225022	1.95314	1.70749	0.00408163	0.016055	0.0117474	Inactivating
DEPDC1	1.47206	0.225022	1.95314	1.70749	0.00408163	0.016055	0.0117474	Inactivating
MGMT	1.47206	0.225022	1.95314	1.70749	0.00408163	0.016055	0.0117474	Inactivating
UBN1	1.47206	0.225022	1.95314	1.70749	0.00408163	0.016055	0.0117474	Inactivating
NCAPH	1.47206	0.225022	1.94827	1.70749	0.00408163	0.016055	0.0117474	Inactivating
CEACAM18	1.47206	0.225022	1.94706	1.70749	0.00408163	0.016055	0.0117474	Inactivating
CHN1	1.47206	0.225022	1.94706	1.70749	0.00408163	0.016055	0.0117474	Inactivating
G6PD	1.47206	0.225022	1.94706	1.70749	0.00408163	0.016055	0.0117474	Inactivating
MYO19	1.47206	0.225022	1.94706	1.70749	0.00408163	0.016055	0.0117474	Inactivating
PTCHD3	1.47206	0.225022	1.94706	1.70749	0.00408163	0.016055	0.0117474	Inactivating
HIST1H2AH	1.47206	0.225022	1.94102	1.70749	0.00408163	0.016055	0.0117474	Inactivating
MRC1	1.47206	0.225022	1.94102	1.70749	0.00408163	0.016055	0.0117474	Inactivating
OR5M3	1.47206	0.225022	1.94102	1.70749	0.00408163	0.016055	0.0117474	Inactivating
FAM83C	1.47206	0.225022	1.93741	1.70749	0.00408163	0.016055	0.0117474	Inactivating
PIAS2	1.47206	0.225022	1.93741	1.70749	0.00408163	0.016055	0.0117474	Inactivating
ZNF513	1.47206	0.225022	1.93502	1.70749	0.00408163	0.016055	0.0117474	Inactivating
OR2S2	1.47206	0.225022	1.93382	1.70749	0.00408163	0.016055	0.0117474	Inactivating
SOX13	1.47206	0.225022	1.93382	1.70749	0.00408163	0.016055	0.0117474	Inactivating
SPOCD1	1.47206	0.225022	1.93382	1.70749	0.00408163	0.016055	0.0117474	Inactivating
LIMK1	1.46659	0.225885	1.93765	1.11773	0.0169492	0.0138889	0.0150188	Inactivating
ALMS1	1.44134	0.229923	1.97107	0.739746	0.0408163	0.0504587	0.0469897	Inactivating
HIP1	1.43507	0.230938	1.97856	0.788144	0.0169492	0.0277778	0.0237797	Inactivating
SLCO6A1	1.43468	0.231002	1.97788	1.07255	0.0204082	0.0252294	0.0234949	Inactivating
WDR90	1.43468	0.231002	1.97666	1.07255	0.0204082	0.0252294	0.0234949	Inactivating
CAB39L	1.43468	0.231002	1.97545	1.07255	0.0204082	0.0252294	0.0234949	Inactivating
CPZ	1.43468	0.231002	1.97545	1.07255	0.0204082	0.0252294	0.0234949	Inactivating
NRIP1	1.43468	0.231002	1.97302	1.07255	0.0204082	0.0252294	0.0234949	Inactivating
MYO10	1.43468	0.231002	1.97181	1.07255	0.0204082	0.0252294	0.0234949	Inactivating
DCTD	1.43468	0.231002	1.9706	1.07255	0.0204082	0.0252294	0.0234949	Inactivating
CGGBP1	1.43468	0.231002	1.96939	1.07255	0.0204082	0.0252294	0.0234949	Inactivating
ETV5	1.42978	0.2318	1.97499	1.43433	0.00677966	0.0119048	0.0100125	Inactivating
RPS6KB1	1.42978	0.2318	1.97378	1.43433	0.00677966	0.0119048	0.0100125	Inactivating
ABCB1	1.42658	0.232324	1.97703	0.890685	0.0163265	0.0412844	0.0323054	Inactivating
DEFB104A	1.42658	0.232324	1.97703	0.890685	0.0163265	0.0412844	0.0323054	Inactivating
LCP1	1.42658	0.232324	1.97461	0.890685	0.0163265	0.0412844	0.0323054	Inactivating
MCPH1	1.42658	0.232324	1.97461	0.890685	0.0163265	0.0412844	0.0323054	Inactivating
UNC5C	1.42658	0.232324	1.97461	0.890685	0.0163265	0.0412844	0.0323054	Inactivating
PHF3	1.42658	0.232324	1.971	0.890685	0.0163265	0.0412844	0.0323054	Inactivating
CNTN4	1.41991	0.233418	1.97907	0.796859	0.0285714	0.0458716	0.0396476	Inactivating
SGCZ	1.41082	0.234921	1.9906	0.691787	0.0285714	0.0619266	0.0499266	Inactivating
ZFYVE28	1.40361	0.23612	1.99954	1.13993	0.0163265	0.0229358	0.020558	Inactivating
USP31	1.40361	0.23612	1.99832	1.13993	0.0163265	0.0229358	0.020558	Inactivating
MS4A14	1.40361	0.23612	1.99711	1.13993	0.0163265	0.0229358	0.020558	Inactivating
CR1	1.40361	0.23612	1.99589	1.13993	0.0163265	0.0229358	0.020558	Inactivating
HAND2	1.40361	0.23612	1.99589	1.13993	0.0163265	0.0229358	0.020558	Inactivating
MFSD8	1.40361	0.23612	1.99589	1.13993	0.0163265	0.0229358	0.020558	Inactivating
TMPRSS15	1.40361	0.23612	1.99226	1.13993	0.0163265	0.0229358	0.020558	Inactivating
ASPH	1.40361	0.23612	1.99105	1.13993	0.0163265	0.0229358	0.020558	Inactivating
DYRK1A	1.40361	0.23612	1.98985	1.13993	0.0163265	0.0229358	0.020558	Inactivating
GLI3	1.40361	0.23612	1.98985	1.13993	0.0163265	0.0229358	0.020558	Inactivating
RXFP2	1.40361	0.23612	1.98985	1.13993	0.0163265	0.0229358	0.020558	Inactivating
OR5T3	1.40361	0.23612	1.98623	1.13993	0.0163265	0.0229358	0.020558	Inactivating
KLHDC7A	1.40361	0.23612	1.98503	1.13993	0.0163265	0.0229358	0.020558	Inactivating
RTN4	1.40361	0.23612	1.98503	1.13993	0.0163265	0.0229358	0.020558	Inactivating
SLC7A14	1.40361	0.23612	1.98264	1.13993	0.0135593	0.0198413	0.0175219	Inactivating
ULK1	1.39848	0.236977	1.98864	1.39459	0.00816327	0.0183486	0.0146843	Inactivating
CHRM3	1.39848	0.236977	1.98744	1.39459	0.00816327	0.0183486	0.0146843	Inactivating
PPIAL4A	1.39848	0.236977	1.98744	1.39459	0.00816327	0.0183486	0.0146843	Inactivating
CDYL2	1.39848	0.236977	1.98504	1.39459	0.00816327	0.0183486	0.0146843	Inactivating
MCM8	1.39848	0.236977	1.98385	1.39459	0.00816327	0.0183486	0.0146843	Inactivating
SLC12A7	1.39848	0.236977	1.98385	1.39459	0.00816327	0.0183486	0.0146843	Inactivating
ITGA11	1.39848	0.236977	1.98146	1.39459	0.00816327	0.0183486	0.0146843	Inactivating
MSX1	1.39848	0.236977	1.98146	1.39459	0.00816327	0.0183486	0.0146843	Inactivating
OR8H2	1.39848	0.236977	1.98146	1.39459	0.00816327	0.0183486	0.0146843	Inactivating
PLEKHG3	1.39848	0.236977	1.98146	1.39459	0.00816327	0.0183486	0.0146843	Inactivating
PRSS48	1.39848	0.236977	1.98146	1.39459	0.00816327	0.0183486	0.0146843	Inactivating
SLC38A10	1.39848	0.236977	1.98146	1.39459	0.00816327	0.0183486	0.0146843	Inactivating
ANAPC1	1.39848	0.236977	1.97434	1.39459	0.00816327	0.0183486	0.0146843	Inactivating
HPSE	1.39848	0.236977	1.97434	1.39459	0.00816327	0.0183486	0.0146843	Inactivating
SCD5	1.39848	0.236977	1.97434	1.39459	0.00816327	0.0183486	0.0146843	Inactivating
MED13L	1.39848	0.236977	1.9708	1.39459	0.00816327	0.0183486	0.0146843	Inactivating
TMC3	1.39848	0.236977	1.9708	1.39459	0.00816327	0.0183486	0.0146843	Inactivating
ZNF45	1.39848	0.236977	1.9708	1.39459	0.00816327	0.0183486	0.0146843	Inactivating
C8B	1.39848	0.236977	1.96727	1.39459	0.00816327	0.0183486	0.0146843	Inactivating
OR5W2	1.39848	0.236977	1.96727	1.39459	0.00816327	0.0183486	0.0146843	Inactivating
PDGFRB	1.39848	0.236977	1.96727	1.39459	0.00816327	0.0183486	0.0146843	Inactivating
ZBTB7C	1.39848	0.236977	1.96727	1.39459	0.00816327	0.0183486	0.0146843	Inactivating
ARNT	1.39848	0.236977	1.96258	1.39459	0.00816327	0.0183486	0.0146843	Inactivating
CARD10	1.39848	0.236977	1.96141	1.39459	0.00816327	0.0183486	0.0146843	Inactivating
OR4N2	1.39848	0.236977	1.96141	1.39459	0.00816327	0.0183486	0.0146843	Inactivating
OR5H15	1.39848	0.236977	1.96141	1.39459	0.00816327	0.0183486	0.0146843	Inactivating
AKR1C1	1.39848	0.236977	1.95792	1.39459	0.00816327	0.0183486	0.0146843	Inactivating
BMS1	1.39848	0.236977	1.95675	1.39459	0.00816327	0.0183486	0.0146843	Inactivating
ST6GALNAC3	1.39848	0.236977	1.95675	1.39459	0.00816327	0.0183486	0.0146843	Inactivating
ZNRF3	1.39848	0.236977	1.95675	1.39459	0.00816327	0.0183486	0.0146843	Inactivating
FGD6	1.39848	0.236977	1.95327	1.39459	0.00816327	0.0183486	0.0146843	Inactivating
RNF6	1.39848	0.236977	1.95327	1.39459	0.00816327	0.0183486	0.0146843	Inactivating
AKAP1	1.39848	0.236977	1.95096	1.39459	0.00816327	0.0183486	0.0146843	Inactivating
PNLIPRP1	1.39848	0.236977	1.95096	1.39459	0.00816327	0.0183486	0.0146843	Inactivating
CDC20B	1.39848	0.236977	1.94865	1.39459	0.00816327	0.0183486	0.0146843	Inactivating
GOT1L1	1.39848	0.236977	1.94865	1.39459	0.00816327	0.0183486	0.0146843	Inactivating
ZNF429	1.39848	0.236977	1.94865	1.39459	0.00816327	0.0183486	0.0146843	Inactivating
BHLHE40	1.39848	0.236977	1.9452	1.39459	0.00816327	0.0183486	0.0146843	Inactivating
GOLGA1	1.39848	0.236977	1.94405	1.39459	0.00816327	0.0183486	0.0146843	Inactivating
FBXL5	1.39848	0.236977	1.94291	1.39459	0.00816327	0.0183486	0.0146843	Inactivating
PVRL3	1.39848	0.236977	1.94176	1.39459	0.00677966	0.015873	0.0125156	Inactivating
CASR	1.39848	0.236977	1.94062	1.39459	0.00677966	0.015873	0.0125156	Inactivating
POLN	1.38749	0.238829	1.95463	1.23765	0.0122449	0.0206422	0.0176211	Inactivating
WWC1	1.38749	0.238829	1.95348	1.23765	0.0122449	0.0206422	0.0176211	Inactivating
ZMYM5	1.38749	0.238829	1.95233	1.23765	0.0122449	0.0206422	0.0176211	Inactivating
CRMP1	1.38749	0.238829	1.95119	1.23765	0.0122449	0.0206422	0.0176211	Inactivating
TRPV4	1.38749	0.238829	1.95119	1.23765	0.0122449	0.0206422	0.0176211	Inactivating
CHRM2	1.38749	0.238829	1.9489	1.23765	0.0122449	0.0206422	0.0176211	Inactivating
USP6NL	1.38749	0.238829	1.9489	1.23765	0.0122449	0.0206422	0.0176211	Inactivating
CTPS2	1.38749	0.238829	1.94661	1.23765	0.0122449	0.0206422	0.0176211	Inactivating
CLCC1	1.38749	0.238829	1.94547	1.23765	0.0122449	0.0206422	0.0176211	Inactivating
KDM3B	1.38749	0.238829	1.94547	1.23765	0.0122449	0.0206422	0.0176211	Inactivating
A1CF	1.38749	0.238829	1.9432	1.23765	0.0122449	0.0206422	0.0176211	Inactivating
IL4R	1.38749	0.238829	1.9432	1.23765	0.0122449	0.0206422	0.0176211	Inactivating
OR5D14	1.38749	0.238829	1.9432	1.23765	0.0122449	0.0206422	0.0176211	Inactivating
NF2	1.38749	0.238829	1.93979	1.23765	0.0122449	0.0206422	0.0176211	Inactivating
LRRC40	1.38749	0.238829	1.93866	1.23765	0.0122449	0.0206422	0.0176211	Inactivating
OR5L2	1.38749	0.238829	1.93866	1.23765	0.0122449	0.0206422	0.0176211	Inactivating
ACTBL2	1.38749	0.238829	1.9364	1.23765	0.0122449	0.0206422	0.0176211	Inactivating
MACC1	1.38749	0.238829	1.9364	1.23765	0.0122449	0.0206422	0.0176211	Inactivating
PIP5K1B	1.38749	0.238829	1.93414	1.23765	0.0122449	0.0206422	0.0176211	Inactivating
VCX3B	1.38749	0.238829	1.93302	1.23765	0.0122449	0.0206422	0.0176211	Inactivating
DCLK2	1.38749	0.238829	1.93189	1.23765	0.0122449	0.0206422	0.0176211	Inactivating
GRPR	1.38749	0.238829	1.93189	1.23765	0.0122449	0.0206422	0.0176211	Inactivating
SGIP1	1.38749	0.238829	1.93189	1.23765	0.0122449	0.0206422	0.0176211	Inactivating
SRRM4	1.38749	0.238829	1.93189	1.23765	0.0122449	0.0206422	0.0176211	Inactivating
GPBP1	1.38749	0.238829	1.92741	1.23765	0.0122449	0.0206422	0.0176211	Inactivating
ZNF582	1.38749	0.238829	1.92629	1.23765	0.0122449	0.0206422	0.0176211	Inactivating
PTPRU	1.38749	0.238829	1.92517	1.23765	0.0122449	0.0206422	0.0176211	Inactivating
GABRG2	1.38749	0.238829	1.92406	1.23765	0.0122449	0.0206422	0.0176211	Inactivating
HAUS6	1.38749	0.238829	1.92406	1.23765	0.0122449	0.0206422	0.0176211	Inactivating
ASTE1	1.38749	0.238829	1.92183	1.23765	0.0122449	0.0206422	0.0176211	Inactivating
NACA	1.37962	0.240165	1.93146	0.951664	0.0101695	0.0257937	0.020025	Inactivating
NLRP14	1.37349	0.241213	1.93877	0.920219	0.0122449	0.0389908	0.0293686	Inactivating
C8orf48	1.37349	0.241213	1.93765	0.920219	0.0122449	0.0389908	0.0293686	Inactivating
CTSB	1.37349	0.241213	1.93765	0.920219	0.0122449	0.0389908	0.0293686	Inactivating
DEFB135	1.37349	0.241213	1.93765	0.920219	0.0122449	0.0389908	0.0293686	Inactivating
FAM86B1	1.37349	0.241213	1.93765	0.920219	0.0122449	0.0389908	0.0293686	Inactivating
KIAA1456	1.37349	0.241213	1.93765	0.920219	0.0122449	0.0389908	0.0293686	Inactivating
RHOBTB2	1.37349	0.241213	1.93765	0.920219	0.0122449	0.0389908	0.0293686	Inactivating
ZNF705D	1.37349	0.241213	1.93765	0.920219	0.0122449	0.0389908	0.0293686	Inactivating
TRIM33	1.37349	0.241213	1.92984	0.920219	0.0122449	0.0389908	0.0293686	Inactivating
C8orf49	1.37349	0.241213	1.92873	0.920219	0.0122449	0.0389908	0.0293686	Inactivating
DIP2C	1.37349	0.241213	1.92873	0.920219	0.0122449	0.0389908	0.0293686	Inactivating
GATA4	1.37349	0.241213	1.92873	0.920219	0.0122449	0.0389908	0.0293686	Inactivating
AMPD1	1.37349	0.241213	1.92541	0.920219	0.0122449	0.0389908	0.0293686	Inactivating
C8orf12	1.37349	0.241213	1.92541	0.920219	0.0122449	0.0389908	0.0293686	Inactivating
DEFA6	1.37349	0.241213	1.92541	0.920219	0.0122449	0.0389908	0.0293686	Inactivating
SLC35G5	1.37349	0.241213	1.92541	0.920219	0.0122449	0.0389908	0.0293686	Inactivating
HIPK1	1.37349	0.241213	1.921	0.920219	0.0122449	0.0389908	0.0293686	Inactivating
NRXN3	1.37121	0.241604	1.92301	0.616633	0.0305085	0.0496032	0.0425532	Inactivating
ABCC8	1.3574	0.243988	1.94088	0.808424	0.0244898	0.043578	0.0367107	Inactivating
ZNF658	1.3574	0.243988	1.93977	0.808424	0.0244898	0.043578	0.0367107	Inactivating
HIST1H2BF	1.35147	0.245021	1.94687	1.02497	0.00677966	0.0198413	0.0150188	Inactivating
ZEB2	1.35021	0.245241	1.9475	0.693448	0.0305085	0.031746	0.0312891	Inactivating
WDR7	1.3445	0.246241	1.95433	0.693809	0.0244898	0.059633	0.0469897	Inactivating
HOOK3	1.33611	0.247722	1.96496	0.998986	0.00677966	0.0238095	0.0175219	Inactivating
FECH	1.32483	0.249727	1.97973	0.960195	0.00816327	0.0366972	0.0264317	Inactivating
FAM155A	1.32483	0.249727	1.97861	0.960195	0.00816327	0.0366972	0.0264317	Inactivating
LRRTM4	1.32483	0.249727	1.97748	0.960195	0.00816327	0.0366972	0.0264317	Inactivating
NOL4	1.32483	0.249727	1.97748	0.960195	0.00816327	0.0366972	0.0264317	Inactivating
SYTL5	1.32483	0.249727	1.97523	0.960195	0.00816327	0.0366972	0.0264317	Inactivating
NFIB	1.32162	0.250301	1.97865	1.10182	0.00338983	0.0178571	0.0125156	Inactivating
TBC1D5	1.3206	0.250484	1.97897	0.93862	0.0285714	0.0275229	0.0279001	Inactivating
CECR2	1.3089	0.252593	1.9945	0.749208	0.0326531	0.0458716	0.041116	Inactivating
KDR	1.30813	0.252733	1.99447	0.799573	0.0101695	0.0277778	0.0212766	Inactivating
ARPP21	1.30706	0.252928	1.99488	0.833559	0.0408163	0.0321101	0.0352423	Inactivating
CNKSR2	1.29641	0.25487	2.00905	0.822961	0.0204082	0.0412844	0.0337739	Inactivating
MYH4	1.29641	0.25487	2.00792	0.822961	0.0204082	0.0412844	0.0337739	Inactivating
LPL	1.29641	0.25487	2.00678	0.822961	0.0204082	0.0412844	0.0337739	Inactivating
MAGEB6	1.28283	0.257373	2.02534	1.01776	0.00408163	0.0344037	0.0234949	Inactivating
AGBL1	1.28283	0.257373	2.02419	1.01776	0.00408163	0.0344037	0.0234949	Inactivating
CASQ2	1.28283	0.257373	2.02419	1.01776	0.00408163	0.0344037	0.0234949	Inactivating
MYO3A	1.28283	0.257373	2.0219	1.01776	0.00408163	0.0344037	0.0234949	Inactivating
VPS13B	1.27844	0.25819	2.02718	0.559237	0.044898	0.0802752	0.0675477	Inactivating
SMAD4	1.27605	0.258635	2.02952	0.519624	0.0440678	0.0654762	0.057572	Inactivating
HRNR	1.27403	0.259012	2.03134	0.704005	0.0408163	0.0481651	0.0455213	Inactivating
CEP152	1.26932	0.259894	2.0371	0.972438	0.0244898	0.0252294	0.0249633	Inactivating
SPATA4	1.26932	0.259894	2.03595	0.972438	0.0244898	0.0252294	0.0249633	Inactivating
COL6A6	1.25077	0.263406	2.06231	0.657247	0.0285714	0.059633	0.0484581	Inactivating
AKT2	1.24963	0.263623	2.06285	1.67977	0.00338983	0.00793651	0.00625782	Inactivating
TUBGCP6	1.2448	0.264547	2.06891	0.847634	0.0367347	0.0298165	0.0323054	Inactivating
IRF2	1.24399	0.264703	2.06897	0.755903	0.0285714	0.043578	0.0381791	Inactivating
SNX25	1.24399	0.264703	2.06781	0.755903	0.0285714	0.043578	0.0381791	Inactivating
KLHL4	1.24399	0.264703	2.06665	0.755903	0.0285714	0.043578	0.0381791	Inactivating
UBR5	1.24119	0.265242	2.06969	0.503658	0.0474576	0.0515873	0.0500626	Inactivating
SCAND3	1.23726	0.265999	2.07444	0.841542	0.0163265	0.0389908	0.030837	Inactivating
PCDHB12	1.23726	0.265999	2.07327	0.841542	0.0163265	0.0389908	0.030837	Inactivating
AGPAT5	1.23726	0.265999	2.07211	0.841542	0.0163265	0.0389908	0.030837	Inactivating
MTMR9	1.23726	0.265999	2.07211	0.841542	0.0163265	0.0389908	0.030837	Inactivating
NEFM	1.23726	0.265999	2.07211	0.841542	0.0163265	0.0389908	0.030837	Inactivating
ENTPD4	1.23726	0.265999	2.06863	0.841542	0.0163265	0.0389908	0.030837	Inactivating
FSTL5	1.23368	0.266692	2.07287	0.56115	0.0372881	0.0575397	0.0500626	Inactivating
TMEM132D	1.22737	0.267919	2.08123	0.562437	0.020339	0.0575397	0.0438048	Inactivating
TRPC3	1.22323	0.268729	2.08636	1.01723	0.0204082	0.0229358	0.0220264	Inactivating
ZFX	1.22323	0.268729	2.08636	1.01723	0.0204082	0.0229358	0.0220264	Inactivating
PORCN	1.22323	0.268729	2.08403	1.01723	0.0204082	0.0229358	0.0220264	Inactivating
COL15A1	1.22323	0.268729	2.08287	1.01723	0.0204082	0.0229358	0.0220264	Inactivating
GPC6	1.22323	0.268729	2.08171	1.01723	0.0204082	0.0229358	0.0220264	Inactivating
COL17A1	1.22323	0.268729	2.08055	1.01723	0.0204082	0.0229358	0.0220264	Inactivating
ZFC3H1	1.22323	0.268729	2.08055	1.01723	0.0204082	0.0229358	0.0220264	Inactivating
ARID4A	1.22323	0.268729	2.07824	1.01723	0.0204082	0.0229358	0.0220264	Inactivating
TPO	1.22323	0.268729	2.07708	1.01723	0.0204082	0.0229358	0.0220264	Inactivating
XPO4	1.22323	0.268729	2.07708	1.01723	0.0204082	0.0229358	0.0220264	Inactivating
ZC3HAV1	1.22323	0.268729	2.07708	1.01723	0.0204082	0.0229358	0.0220264	Inactivating
COL27A1	1.22323	0.268729	2.07362	1.01723	0.0204082	0.0229358	0.0220264	Inactivating
RAD51B	1.22311	0.26875	2.07264	1.41073	0.00677966	0.00595238	0.00625782	Inactivating
PSD3	1.2139	0.270562	2.08546	0.700259	0.0163265	0.0550459	0.041116	Inactivating
BLM	1.20911	0.271509	2.0916	0.944557	0.0101695	0.015873	0.0137672	Inactivating
GPSM2	1.2048	0.272365	2.09703	1.61739	0.00408163	0.0137615	0.010279	Inactivating
ZNF24	1.2048	0.272365	2.09587	1.61739	0.00408163	0.0137615	0.010279	Inactivating
CCDC116	1.2048	0.272365	2.09471	1.61739	0.00408163	0.0137615	0.010279	Inactivating
CDCA7L	1.2048	0.272365	2.09471	1.61739	0.00408163	0.0137615	0.010279	Inactivating
NAT8L	1.2048	0.272365	2.09471	1.61739	0.00408163	0.0137615	0.010279	Inactivating
NCK2	1.2048	0.272365	2.09471	1.61739	0.00408163	0.0137615	0.010279	Inactivating
OR14C36	1.2048	0.272365	2.09009	1.61739	0.00408163	0.0137615	0.010279	Inactivating
CAPN13	1.2048	0.272365	2.08893	1.61739	0.00408163	0.0137615	0.010279	Inactivating
PRMT6	1.2048	0.272365	2.08893	1.61739	0.00408163	0.0137615	0.010279	Inactivating
MPEG1	1.2048	0.272365	2.08663	1.61739	0.00408163	0.0137615	0.010279	Inactivating
KRT74	1.2048	0.272365	2.08548	1.61739	0.00408163	0.0137615	0.010279	Inactivating
NR1H4	1.2048	0.272365	2.08548	1.61739	0.00408163	0.0137615	0.010279	Inactivating
AK3	1.2048	0.272365	2.08319	1.61739	0.00408163	0.0137615	0.010279	Inactivating
FAM53B	1.2048	0.272365	2.08319	1.61739	0.00408163	0.0137615	0.010279	Inactivating
NME7	1.2048	0.272365	2.08319	1.61739	0.00408163	0.0137615	0.010279	Inactivating
C7orf10	1.2048	0.272365	2.07976	1.61739	0.00408163	0.0137615	0.010279	Inactivating
CDH4	1.2048	0.272365	2.07976	1.61739	0.00408163	0.0137615	0.010279	Inactivating
ZSCAN1	1.2048	0.272365	2.07976	1.61739	0.00408163	0.0137615	0.010279	Inactivating
LIN7A	1.2048	0.272365	2.07634	1.61739	0.00408163	0.0137615	0.010279	Inactivating
NDUFB3	1.2048	0.272365	2.07634	1.61739	0.00408163	0.0137615	0.010279	Inactivating
SLC9A4	1.2048	0.272365	2.07634	1.61739	0.00408163	0.0137615	0.010279	Inactivating
CSAD	1.2048	0.272365	2.07293	1.61739	0.00408163	0.0137615	0.010279	Inactivating
DDX1	1.2048	0.272365	2.07293	1.61739	0.00408163	0.0137615	0.010279	Inactivating
LCORL	1.2048	0.272365	2.07293	1.61739	0.00408163	0.0137615	0.010279	Inactivating
MPP6	1.2048	0.272365	2.07293	1.61739	0.00408163	0.0137615	0.010279	Inactivating
OR5A2	1.2048	0.272365	2.07293	1.61739	0.00408163	0.0137615	0.010279	Inactivating
PPIL3	1.2048	0.272365	2.07293	1.61739	0.00408163	0.0137615	0.010279	Inactivating
SLC6A18	1.2048	0.272365	2.07293	1.61739	0.00408163	0.0137615	0.010279	Inactivating
ECT2	1.2048	0.272365	2.06502	1.61739	0.00408163	0.0137615	0.010279	Inactivating
PTER	1.2048	0.272365	2.06389	1.61739	0.00408163	0.0137615	0.010279	Inactivating
BBS10	1.2048	0.272365	2.06277	1.61739	0.00408163	0.0137615	0.010279	Inactivating
FAM188B	1.2048	0.272365	2.06277	1.61739	0.00408163	0.0137615	0.010279	Inactivating
FOXI1	1.2048	0.272365	2.06277	1.61739	0.00408163	0.0137615	0.010279	Inactivating
LINC00955	1.2048	0.272365	2.06277	1.61739	0.00408163	0.0137615	0.010279	Inactivating
OSBP2	1.2048	0.272365	2.06277	1.61739	0.00408163	0.0137615	0.010279	Inactivating
ARMCX5	1.2048	0.272365	2.05716	1.61739	0.00408163	0.0137615	0.010279	Inactivating
FAM83H	1.2048	0.272365	2.05716	1.61739	0.00408163	0.0137615	0.010279	Inactivating
FZD1	1.2048	0.272365	2.05716	1.61739	0.00408163	0.0137615	0.010279	Inactivating
GALNT1	1.2048	0.272365	2.05716	1.61739	0.00408163	0.0137615	0.010279	Inactivating
PNPT1	1.2048	0.272365	2.05716	1.61739	0.00408163	0.0137615	0.010279	Inactivating
SKIV2L	1.2048	0.272365	2.05716	1.61739	0.00408163	0.0137615	0.010279	Inactivating
STRN4	1.2048	0.272365	2.05716	1.61739	0.00408163	0.0137615	0.010279	Inactivating
AP1B1	1.2048	0.272365	2.04937	1.61739	0.00408163	0.0137615	0.010279	Inactivating
CYTL1	1.2048	0.272365	2.04937	1.61739	0.00408163	0.0137615	0.010279	Inactivating
DHRS9	1.2048	0.272365	2.04937	1.61739	0.00408163	0.0137615	0.010279	Inactivating
NELFA	1.2048	0.272365	2.04937	1.61739	0.00408163	0.0137615	0.010279	Inactivating
RFX4	1.2048	0.272365	2.04937	1.61739	0.00408163	0.0137615	0.010279	Inactivating
S100P	1.2048	0.272365	2.04937	1.61739	0.00408163	0.0137615	0.010279	Inactivating
SETD9	1.2048	0.272365	2.04937	1.61739	0.00408163	0.0137615	0.010279	Inactivating
ST3GAL5	1.2048	0.272365	2.04937	1.61739	0.00408163	0.0137615	0.010279	Inactivating
FAM171B	1.2048	0.272365	2.04054	1.61739	0.00408163	0.0137615	0.010279	Inactivating
FMO1	1.2048	0.272365	2.04054	1.61739	0.00408163	0.0137615	0.010279	Inactivating
GABRP	1.2048	0.272365	2.04054	1.61739	0.00408163	0.0137615	0.010279	Inactivating
TMPRSS3	1.2048	0.272365	2.04054	1.61739	0.00408163	0.0137615	0.010279	Inactivating
ABI3BP	1.2048	0.272365	2.03615	1.61739	0.00408163	0.0137615	0.010279	Inactivating
GSTM2	1.2048	0.272365	2.03615	1.61739	0.00408163	0.0137615	0.010279	Inactivating
OR4C46	1.2048	0.272365	2.03615	1.61739	0.00408163	0.0137615	0.010279	Inactivating
PITRM1	1.2048	0.272365	2.03615	1.61739	0.00408163	0.0137615	0.010279	Inactivating
RBBP6	1.2048	0.272365	2.03615	1.61739	0.00408163	0.0137615	0.010279	Inactivating
SOD3	1.2048	0.272365	2.03615	1.61739	0.00408163	0.0137615	0.010279	Inactivating
TARS	1.2048	0.272365	2.03615	1.61739	0.00408163	0.0137615	0.010279	Inactivating
ITGA3	1.2048	0.272365	2.02852	1.61739	0.00408163	0.0137615	0.010279	Inactivating
LRPAP1	1.2048	0.272365	2.02852	1.61739	0.00408163	0.0137615	0.010279	Inactivating
OR10A7	1.2048	0.272365	2.02852	1.61739	0.00408163	0.0137615	0.010279	Inactivating
TUBGCP3	1.2048	0.272365	2.02852	1.61739	0.00408163	0.0137615	0.010279	Inactivating
RLIM	1.2048	0.272365	2.02418	1.61739	0.00408163	0.0137615	0.010279	Inactivating
EIF2S2	1.2048	0.272365	2.0231	1.61739	0.00408163	0.0137615	0.010279	Inactivating
KRT83	1.2048	0.272365	2.0231	1.61739	0.00408163	0.0137615	0.010279	Inactivating
SLC15A2	1.2048	0.272365	2.0231	1.61739	0.00408163	0.0137615	0.010279	Inactivating
A4GNT	1.2048	0.272365	2.01986	1.61739	0.00408163	0.0137615	0.010279	Inactivating
RXRA	1.2048	0.272365	2.01986	1.61739	0.00408163	0.0137615	0.010279	Inactivating
UBXN7	1.2048	0.272365	2.01986	1.61739	0.00408163	0.0137615	0.010279	Inactivating
AKR1E2	1.2048	0.272365	2.01663	1.61739	0.00408163	0.0137615	0.010279	Inactivating
BHLHE22	1.2048	0.272365	2.01663	1.61739	0.00408163	0.0137615	0.010279	Inactivating
NDUFAF2	1.2048	0.272365	2.01663	1.61739	0.00408163	0.0137615	0.010279	Inactivating
SLC20A2	1.2048	0.272365	2.01663	1.61739	0.00408163	0.0137615	0.010279	Inactivating
CYP7B1	1.2048	0.272365	2.01235	1.61739	0.00408163	0.0137615	0.010279	Inactivating
PPAP2A	1.2048	0.272365	2.01235	1.61739	0.00408163	0.0137615	0.010279	Inactivating
RNF182	1.2048	0.272365	2.01235	1.61739	0.00408163	0.0137615	0.010279	Inactivating
SRRM3	1.2048	0.272365	2.01235	1.61739	0.00408163	0.0137615	0.010279	Inactivating
ASB4	1.2048	0.272365	2.00808	1.61739	0.00408163	0.0137615	0.010279	Inactivating
GPR128	1.2048	0.272365	2.00808	1.61739	0.00408163	0.0137615	0.010279	Inactivating
RLN2	1.2048	0.272365	2.00808	1.61739	0.00408163	0.0137615	0.010279	Inactivating
HRH4	1.2048	0.272365	2.00489	1.61739	0.00408163	0.0137615	0.010279	Inactivating
SMTNL1	1.2048	0.272365	2.00489	1.61739	0.00408163	0.0137615	0.010279	Inactivating
ZNF248	1.2048	0.272365	2.00489	1.61739	0.00408163	0.0137615	0.010279	Inactivating
LILRA4	1.2048	0.272365	2.00171	1.61739	0.00408163	0.0137615	0.010279	Inactivating
SLC35F5	1.2048	0.272365	2.00171	1.61739	0.00408163	0.0137615	0.010279	Inactivating
COQ5	1.2048	0.272365	1.9996	1.61739	0.00408163	0.0137615	0.010279	Inactivating
PTPRR	1.2048	0.272365	1.99854	1.61739	0.00408163	0.0137615	0.010279	Inactivating
PSG11	1.2048	0.272365	1.99749	1.61739	0.00408163	0.0137615	0.010279	Inactivating
ZNF331	1.2048	0.272365	1.99644	1.61739	0.00338983	0.0119048	0.00876095	Inactivating
NRXN2	1.20196	0.27293	1.99952	0.760045	0.0135593	0.0238095	0.020025	Inactivating
MERTK	1.18475	0.276391	2.02381	1.07903	0.0163265	0.0206422	0.0190896	Inactivating
SLC13A1	1.18475	0.276391	2.02275	1.07903	0.0163265	0.0206422	0.0190896	Inactivating
MADD	1.18475	0.276391	2.02168	1.07903	0.0163265	0.0206422	0.0190896	Inactivating
NOP14	1.18475	0.276391	2.02168	1.07903	0.0163265	0.0206422	0.0190896	Inactivating
SLC27A6	1.18475	0.276391	2.02168	1.07903	0.0163265	0.0206422	0.0190896	Inactivating
CEP44	1.18475	0.276391	2.0185	1.07903	0.0163265	0.0206422	0.0190896	Inactivating
MCM10	1.18475	0.276391	2.0185	1.07903	0.0163265	0.0206422	0.0190896	Inactivating
ZNF418	1.18475	0.276391	2.01638	1.07903	0.0163265	0.0206422	0.0190896	Inactivating
CNTNAP1	1.18475	0.276391	2.01532	1.07903	0.0163265	0.0206422	0.0190896	Inactivating
RFFL	1.18475	0.276391	2.01427	1.07903	0.0163265	0.0206422	0.0190896	Inactivating
NUDT10	1.18475	0.276391	2.01321	1.07903	0.0163265	0.0206422	0.0190896	Inactivating
SLC12A1	1.18475	0.276391	2.01216	1.07903	0.0163265	0.0206422	0.0190896	Inactivating
GAS2L2	1.18475	0.276391	2.01111	1.07903	0.0163265	0.0206422	0.0190896	Inactivating
APBB1IP	1.18475	0.276391	2.01005	1.07903	0.0163265	0.0206422	0.0190896	Inactivating
KNTC1	1.18434	0.276474	2.00961	0.86529	0.0326531	0.0275229	0.0293686	Inactivating
STYK1	1.18367	0.276611	2.00955	1.36123	0.00677966	0.00992063	0.00876095	Inactivating
MBP	1.18203	0.276943	2.01091	0.622714	0.0122449	0.0688073	0.0484581	Inactivating
LCT	1.18048	0.277258	2.01215	0.865873	0.0122449	0.0366972	0.0279001	Inactivating
SH2D4A	1.18048	0.277258	2.0111	0.865873	0.0122449	0.0366972	0.0279001	Inactivating
ZDHHC2	1.18048	0.277258	2.01005	0.865873	0.0122449	0.0366972	0.0279001	Inactivating
BMP1	1.18048	0.277258	2.009	0.865873	0.0122449	0.0366972	0.0279001	Inactivating
SYT6	1.18048	0.277258	2.00796	0.865873	0.0122449	0.0366972	0.0279001	Inactivating
FGF20	1.18048	0.277258	2.00691	0.865873	0.0122449	0.0366972	0.0279001	Inactivating
MPDZ	1.18007	0.277342	2.00648	0.764394	0.0244898	0.0412844	0.0352423	Inactivating
TAF1L	1.16372	0.280696	2.02968	0.623676	0.0326531	0.059633	0.0499266	Inactivating
KBTBD12	1.15854	0.281768	2.03637	1.16977	0.0122449	0.0183486	0.0161527	Inactivating
WDR49	1.15854	0.281768	2.03532	1.16977	0.0122449	0.0183486	0.0161527	Inactivating
VAV3	1.15854	0.281768	2.03426	1.16977	0.0122449	0.0183486	0.0161527	Inactivating
RUNX2	1.15854	0.281768	2.0332	1.16977	0.0122449	0.0183486	0.0161527	Inactivating
CLIP2	1.15854	0.281768	2.03215	1.16977	0.0122449	0.0183486	0.0161527	Inactivating
TLL2	1.15854	0.281768	2.03109	1.16977	0.0122449	0.0183486	0.0161527	Inactivating
TXLNG	1.15854	0.281768	2.03109	1.16977	0.0122449	0.0183486	0.0161527	Inactivating
ZFP36L2	1.15854	0.281768	2.02899	1.16977	0.0122449	0.0183486	0.0161527	Inactivating
ARAP1	1.15854	0.281768	2.02794	1.16977	0.0122449	0.0183486	0.0161527	Inactivating
DIS3	1.15854	0.281768	2.02689	1.16977	0.0122449	0.0183486	0.0161527	Inactivating
NR2F2	1.15854	0.281768	2.02689	1.16977	0.0122449	0.0183486	0.0161527	Inactivating
PPRC1	1.15854	0.281768	2.0248	1.16977	0.0122449	0.0183486	0.0161527	Inactivating
PROSC	1.15854	0.281768	2.0248	1.16977	0.0122449	0.0183486	0.0161527	Inactivating
RNF133	1.15854	0.281768	2.0248	1.16977	0.0122449	0.0183486	0.0161527	Inactivating
VPS52	1.15854	0.281768	2.0248	1.16977	0.0122449	0.0183486	0.0161527	Inactivating
IDO2	1.15854	0.281768	2.02062	1.16977	0.0122449	0.0183486	0.0161527	Inactivating
ADAMTS2	1.15854	0.281768	2.01958	1.16977	0.0122449	0.0183486	0.0161527	Inactivating
FILIP1L	1.15854	0.281768	2.01958	1.16977	0.0122449	0.0183486	0.0161527	Inactivating
HSPA13	1.15854	0.281768	2.01958	1.16977	0.0122449	0.0183486	0.0161527	Inactivating
KATNAL1	1.15854	0.281768	2.01958	1.16977	0.0122449	0.0183486	0.0161527	Inactivating
RNF32	1.15854	0.281768	2.01958	1.16977	0.0122449	0.0183486	0.0161527	Inactivating
CNNM1	1.15854	0.281768	2.01439	1.16977	0.0122449	0.0183486	0.0161527	Inactivating
GTSE1	1.15854	0.281768	2.01439	1.16977	0.0122449	0.0183486	0.0161527	Inactivating
VEZT	1.15854	0.281768	2.01439	1.16977	0.0122449	0.0183486	0.0161527	Inactivating
MPO	1.15854	0.281768	2.01128	1.16977	0.0122449	0.0183486	0.0161527	Inactivating
PHF20	1.15854	0.281768	2.01128	1.16977	0.0122449	0.0183486	0.0161527	Inactivating
RREB1	1.15854	0.281768	2.01128	1.16977	0.0122449	0.0183486	0.0161527	Inactivating
EDC4	1.15854	0.281768	2.00819	1.16977	0.0122449	0.0183486	0.0161527	Inactivating
SLC34A2	1.15854	0.281768	2.00819	1.16977	0.0122449	0.0183486	0.0161527	Inactivating
EIF4B	1.15854	0.281768	2.00614	1.16977	0.0122449	0.0183486	0.0161527	Inactivating
MYBBP1A	1.15854	0.281768	2.00511	1.16977	0.0122449	0.0183486	0.0161527	Inactivating
ACTC1	1.15854	0.281768	2.00408	1.16977	0.0101695	0.015873	0.0137672	Inactivating
JAK3	1.15854	0.281768	2.00306	1.16977	0.0101695	0.015873	0.0137672	activating
DUSP22	1.15495	0.282515	2.00734	1.31758	0.00816327	0.016055	0.0132159	Inactivating
SCUBE3	1.15495	0.282515	2.00734	1.31758	0.00816327	0.016055	0.0132159	Inactivating
FAM133A	1.15495	0.282515	2.0053	1.31758	0.00816327	0.016055	0.0132159	Inactivating
OR52N1	1.15495	0.282515	2.00427	1.31758	0.00816327	0.016055	0.0132159	Inactivating
DDB1	1.15495	0.282515	2.00325	1.31758	0.00816327	0.016055	0.0132159	Inactivating
GAB3	1.15495	0.282515	2.00325	1.31758	0.00816327	0.016055	0.0132159	Inactivating
USP25	1.15495	0.282515	2.00325	1.31758	0.00816327	0.016055	0.0132159	Inactivating
ARHGAP27	1.15495	0.282515	2.00019	1.31758	0.00816327	0.016055	0.0132159	Inactivating
PROL1	1.15495	0.282515	2.00019	1.31758	0.00816327	0.016055	0.0132159	Inactivating
ST6GAL2	1.15495	0.282515	2.00019	1.31758	0.00816327	0.016055	0.0132159	Inactivating
IKZF1	1.15495	0.282515	1.99714	1.31758	0.00816327	0.016055	0.0132159	Inactivating
ELOVL7	1.15495	0.282515	1.99613	1.31758	0.00816327	0.016055	0.0132159	Inactivating
TMEM129	1.15495	0.282515	1.99613	1.31758	0.00816327	0.016055	0.0132159	Inactivating
TOP3B	1.15495	0.282515	1.99613	1.31758	0.00816327	0.016055	0.0132159	Inactivating
GZMA	1.15495	0.282515	1.99309	1.31758	0.00816327	0.016055	0.0132159	Inactivating
OR13F1	1.15495	0.282515	1.99309	1.31758	0.00816327	0.016055	0.0132159	Inactivating
TDRD5	1.15495	0.282515	1.99309	1.31758	0.00816327	0.016055	0.0132159	Inactivating
CYLC1	1.15495	0.282515	1.99006	1.31758	0.00816327	0.016055	0.0132159	Inactivating
ITGBL1	1.15495	0.282515	1.99006	1.31758	0.00816327	0.016055	0.0132159	Inactivating
TMEM145	1.15495	0.282515	1.99006	1.31758	0.00816327	0.016055	0.0132159	Inactivating
ZNF548	1.15495	0.282515	1.99006	1.31758	0.00816327	0.016055	0.0132159	Inactivating
NFXL1	1.15495	0.282515	1.98603	1.31758	0.00816327	0.016055	0.0132159	Inactivating
MPP2	1.15495	0.282515	1.98503	1.31758	0.00816327	0.016055	0.0132159	Inactivating
NCKAP1L	1.15495	0.282515	1.98503	1.31758	0.00816327	0.016055	0.0132159	Inactivating
ZNF611	1.15495	0.282515	1.98503	1.31758	0.00816327	0.016055	0.0132159	Inactivating
ZSCAN18	1.15495	0.282515	1.98503	1.31758	0.00816327	0.016055	0.0132159	Inactivating
IRX2	1.15495	0.282515	1.98103	1.31758	0.00816327	0.016055	0.0132159	Inactivating
ITGB3	1.15495	0.282515	1.98103	1.31758	0.00816327	0.016055	0.0132159	Inactivating
RPH3A	1.15495	0.282515	1.97903	1.31758	0.00816327	0.016055	0.0132159	Inactivating
OR6N1	1.15495	0.282515	1.97803	1.31758	0.00816327	0.016055	0.0132159	Inactivating
RAB3GAP1	1.15495	0.282515	1.97803	1.31758	0.00816327	0.016055	0.0132159	Inactivating
A2M	1.15495	0.282515	1.97604	1.31758	0.00816327	0.016055	0.0132159	Inactivating
METTL3	1.15495	0.282515	1.97604	1.31758	0.00816327	0.016055	0.0132159	Inactivating
PACRGL	1.15495	0.282515	1.97604	1.31758	0.00816327	0.016055	0.0132159	Inactivating
QSOX2	1.15495	0.282515	1.97604	1.31758	0.00816327	0.016055	0.0132159	Inactivating
SLC18A3	1.15495	0.282515	1.97604	1.31758	0.00816327	0.016055	0.0132159	Inactivating
COCH	1.15495	0.282515	1.97109	1.31758	0.00816327	0.016055	0.0132159	Inactivating
ERC1	1.15495	0.282515	1.97109	1.31758	0.00816327	0.016055	0.0132159	Inactivating
OR2AT4	1.15495	0.282515	1.96911	1.31758	0.00816327	0.016055	0.0132159	Inactivating
SEC61A2	1.15495	0.282515	1.96911	1.31758	0.00816327	0.016055	0.0132159	Inactivating
TTC13	1.15495	0.282515	1.96911	1.31758	0.00816327	0.016055	0.0132159	Inactivating
ZNF415	1.15495	0.282515	1.96911	1.31758	0.00816327	0.016055	0.0132159	Inactivating
[truncated: 11,907 more rows]
